# Supplementary material for: Transcriptomic Analysis of Alternative Splicing Events during Different Fruit Ripening Stages of Coffea arabica L.
Source: MDPI journal article supplement (doi:10.3390/genes15040459), 2024-04-05

Figure S1: Trend analysis of overlapping genes between DSGs and DEGs in coffee fruit at six ripening stages. Block diagrams with colors indicate trend profiles with a significance level under the cutoff for statistical analysis ( $P < 0.05$ ). The numbers in the blocks indicate counts of genes in the trend profiles.

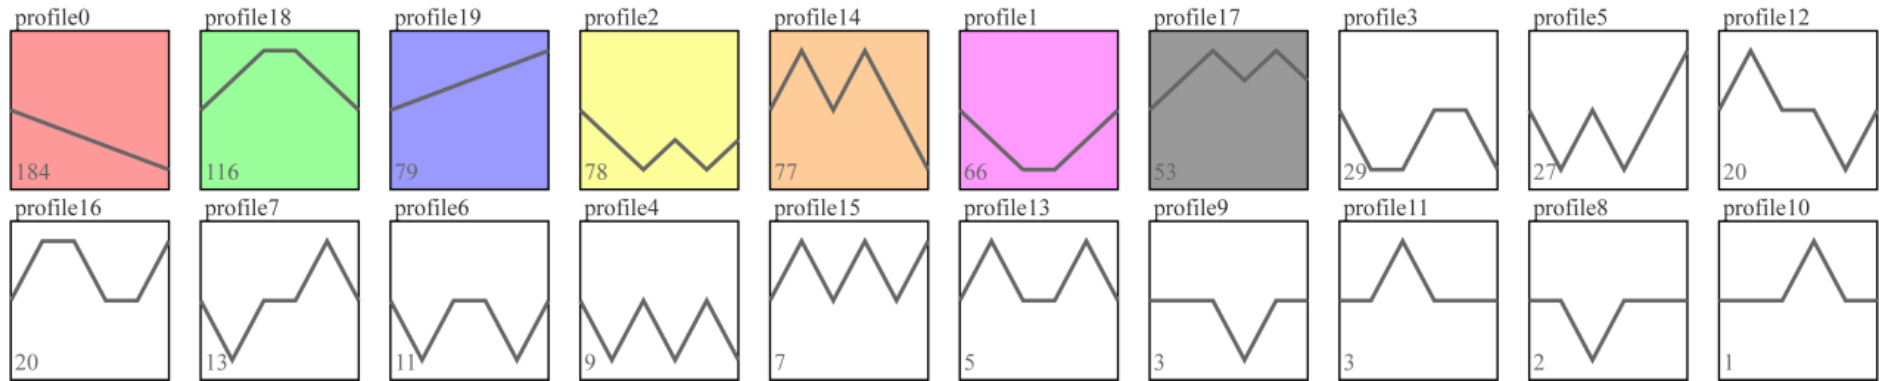

Supplement: s1 [file s1]
