# Supplementary material for: Transcriptomic Analysis of Alternative Splicing Events during Different Fruit Ripening Stages of Coffea arabica L
Source: Genes (Basel). 2024 Apr 5;15(4):459. doi: 10.3390/genes15040459 (PMC11050144; doi:10.3390/genes15040459)
Supplement: Supplementary file 1 [file genes-15-00459-s001.zip › TableS1.xlsx]

## Sheet: Sheet1
Table S1: Basic information - alignment
Sample ID	Number of raw reads	Number of clean reads	Error Rate(%)	Q20(%)	Q30(%)	GC Content(%)	Total mapped rate
S1-1	58459260	55778906	0.02	98.25	94.75	43.52	0.9371
S1-2	49658164	46846878	0.02	98.14	94.42	43.59	0.933
S1-3	55481340	52843682	0.02	98.29	94.8	43.39	0.9363
S2-1	46261302	42186322	0.02	98.24	94.72	43.17	0.9226
S2-2	47672838	45186754	0.03	98.03	94.28	41.11	0.9339
S2-3	48392156	44163468	0.02	98.21	94.69	43.2	0.9243
S3-1	47531040	43899206	0.02	98.15	94.48	43.35	0.9319
S3-2	48078698	43678546	0.02	98.24	94.74	43.43	0.929
S3-3	44237776	40122252	0.02	98.13	94.38	43.28	0.9295
S4-1	49310192	44649208	0.03	98.04	94.27	43.18	0.9319
S4-2	49860358	47972890	0.02	98.31	94.87	43.51	0.9388
S4-3	52652008	50328850	0.02	98.25	94.77	43.76	0.9357
S5-1	46895674	45024664	0.03	98.05	94.21	43.74	0.9329
S5-2	46346662	44112296	0.02	98.23	94.62	43.73	0.9345
S5-3	47558864	44508284	0.02	98.14	94.46	43.82	0.9308
S6-1	44966552	41177536	0.03	97.85	93.83	43.24	0.9162
S6-2	47746900	44440428	0.02	98.18	94.57	43.63	0.924
S6-3	46748728	43700932	0.02	98.13	94.49	43.89	0.9282
Average	4.87699e+07	4.55901e+07	0.0222222	98.1589	94.5194	43.3633	0.9306
