# Supplementary material for: Transcriptomic Analysis of Alternative Splicing Events during Different Fruit Ripening Stages of Coffea arabica L
Source: Genes (Basel). 2024 Apr 5;15(4):459. doi: 10.3390/genes15040459 (PMC11050144; doi:10.3390/genes15040459)
Supplement: Supplementary file 1 [file genes-15-00459-s001.zip › TableS2.xlsx]

## Sheet: Sheet1
Table S2: Comprehensive statistics for all AS events under different ripening stages of coffee fruits.
Types of AS	S1 vs. S2	S2 vs. S3	S3 vs. S4	S4 vs. S5	S5 vs. S6	Total AS events	Percentage
SE	26477	25180	26647	26969	26859	132132	64.775
RI	2489	2305	2430	2517	2500	12241	6.0009
MXE	2818	2660	3023	3081	3077	14659	7.18628
A5SS	3101	2915	3058	3143	3125	15342	7.5211
A3SS	6077	5670	5902	6012	5951	29612	14.5167
Total	40962	38730	41060	41722	41512	203986	100
