# Supplementary material for: Transcriptomic Analysis of Alternative Splicing Events during Different Fruit Ripening Stages of Coffea arabica L
Source: Genes (Basel). 2024 Apr 5;15(4):459. doi: 10.3390/genes15040459 (PMC11050144; doi:10.3390/genes15040459)
Supplement: Supplementary file 1 [file genes-15-00459-s001.zip › TableS3.xlsx]

## Sheet: Sheet1
Table S3. The numbers of AS genes with different types of alternative splicing at different ripening stages of Coffea arabica L.
S1 vs. S2					S2 vs. S3					S3 vs. S4					S4 vs. S5					S5 vs. S6
SE	RI	MXE	A5SS	A3SS	SE	RI	MXE	A5SS	A3SS	SE	RI	MXE	A5SS	A3SS	SE	RI	MXE	A5SS	A3SS	SE	RI	MXE	A5SS	A3SS
LOC113717047	LOC113731711	LOC113699186	LOC113742953	LOC113701912	LOC113731711	LOC113701912	LOC113714144	LOC113713189	LOC113704330	LOC113717047	LOC113701912	LOC113734085	LOC113693832	LOC113731711	LOC113725528	LOC113692621	LOC113719174	LOC113710454	LOC113701912	LOC113725528	LOC113699186	LOC113719174	LOC113726127	LOC113699186
LOC113701912	LOC113697255	LOC113725528	LOC113713189	LOC113733278	LOC113726917	LOC113710949	LOC113719174	LOC113727211	LOC113703243	LOC113710454	LOC113732403	LOC113734623	LOC113742953	LOC113702082	LOC113710454	LOC113704383	LOC113700042	LOC113704330	LOC113726127	LOC113725610	LOC113734623	LOC113726009	LOC113704330	LOC113704330
LOC113725528	LOC113732403	LOC113722490	LOC113717562	LOC113732403	LOC113733278	LOC113696721	LOC113696166	LOC113727201	LOC113690987	LOC113726917	LOC113730521	LOC113735098	LOC113712529	LOC113733278	LOC113726917	LOC113734623	LOC113727201	LOC113692621	LOC113732403	LOC113698205	LOC113732976	LOC113702899	LOC113704383	LOC113692621
LOC113734093	LOC113692621	LOC113731729	LOC113694499	LOC113704330	LOC113701199	LOC113730521	LOC113736316	LOC113708608	LOC113703667	LOC113733278	LOC113706485	LOC113719174	LOC113717562	LOC113726127	LOC113733278	LOC113736460	LOC113719305	LOC113717631	LOC113704330	LOC113706806	LOC113693973	LOC113719617	LOC113731869	LOC113703243
LOC113726917	LOC113717631	LOC113697872	LOC113703686	LOC113715161	LOC113731695	LOC113701924	LOC113707427	LOC113719487	LOC113701718	LOC113701199	LOC113730644	LOC113700042	LOC113694499	LOC113732403	LOC113714812	LOC113727572	LOC113699360	LOC113712529	LOC113704383	LOC113734085	LOC113688560	LOC113736316	LOC113702183	LOC113706999
LOC113701199	LOC113696721	LOC113730741	LOC113688193	LOC113734085	LOC113690429	LOC113706485	LOC113694152	LOC113732495	LOC113712810	LOC113731695	LOC113738230	LOC113732280	LOC113703686	LOC113709538	LOC113690429	LOC113695174	LOC113740281	LOC113694499	LOC113706999	LOC113734623	LOC113732495	LOC113692604	LOC113731530	LOC113724927
LOC113742757	LOC113714631	LOC113731190	LOC113727211	LOC113730592	LOC113742126	LOC113704217	LOC113692345	LOC113712325	LOC113693973	LOC113692621	LOC113715668	LOC113727211	LOC113706485	LOC113730592	LOC113742757	LOC113714364	LOC113736460	LOC113703686	LOC113739979	LOC113713189	LOC113715668	LOC113698220	LOC113727201	LOC113704673
LOC113716819	LOC113730521	LOC113725659	LOC113700432	LOC113724927	LOC113716819	LOC113742729	LOC113731446	LOC113714536	LOC113712529	LOC113706999	LOC113742201	LOC113695878	LOC113700432	LOC113719688	LOC113694683	LOC113716439	LOC113706838	LOC113734198	LOC113734623	LOC113701718	LOC113735913	LOC113732495	LOC113741368	LOC113695022
LOC113698205	LOC113702183	LOC113731377	LOC113734198	LOC113734623	LOC113698205	LOC113732495	LOC113690829	LOC113693583	LOC113717249	LOC113714144	LOC113724972	LOC113719065	LOC113716897	LOC113725659	LOC113725610	LOC113689881	LOC113714355	LOC113708608	LOC113719174	LOC113704673	LOC113714597	LOC113687997	LOC113706778	LOC113725659
LOC113704383	LOC113701924	LOC113706485	LOC113730585	LOC113712810	LOC113732403	LOC113736460	LOC113719126	LOC113688916	LOC113727391	LOC113691116	LOC113740007	LOC113727703	LOC113727201	LOC113698325	LOC113732403	LOC113717370	LOC113692635	LOC113695931	LOC113701718	LOC113731190	LOC113742023	LOC113712498	LOC113699360	LOC113717249
LOC113714144	LOC113704217	LOC113709380	LOC113695931	LOC113698325	LOC113734085	LOC113741666	LOC113734706	LOC113736006	LOC113688123	LOC113733104	LOC113726293	LOC113736186	LOC113719617	LOC113727391	LOC113706806	LOC113701670	LOC113694125	LOC113727319	LOC113704673	LOC113725659	LOC113737027	LOC113706838	LOC113732495	LOC113697968
LOC113691116	LOC113705280	LOC113739562	LOC113711948	LOC113727391	LOC113691116	LOC113715668	LOC113741256	LOC113688089	LOC113708608	LOC113734623	LOC113742023	LOC113696166	LOC113699360	LOC113697542	LOC113728136	LOC113690940	LOC113731824	LOC113736460	LOC113712810	LOC113693973	LOC113701670	LOC113734052	LOC113738230	LOC113688123
LOC113693505	LOC113730399	LOC113726708	LOC113719487	LOC113697542	LOC113733104	LOC113716787	LOC113701459	LOC113688234	LOC113704217	LOC113724183	LOC113709365	LOC113699360	LOC113712847	LOC113733173	LOC113692621	LOC113693900	LOC113734238	LOC113718552	LOC113688560	LOC113712529	LOC113733115	LOC113738477	LOC113742814	LOC113695904
LOC113737183	LOC113732495	LOC113711948	LOC113732495	LOC113726027	LOC113733024	LOC113724972	LOC113697040	LOC113741643	LOC113708547	LOC113731377	LOC113714510	LOC113697128	LOC113707993	LOC113695878	LOC113691750	LOC113707950	LOC113740407	LOC113703932	LOC113717249	LOC113709774	LOC113716514	LOC113698264	LOC113724972	LOC113708608
LOC113742953	LOC113738230	LOC113712498	LOC113712325	LOC113742135	LOC113742953	LOC113702144	LOC113730199	LOC113689705	LOC113693728	LOC113732053	LOC113704327	LOC113740281	LOC113739744	LOC113716897	LOC113725019	LOC113697196	LOC113714120	LOC113714355	LOC113731530	LOC113716999	LOC113715759	LOC113692635	LOC113739744	LOC113714994
LOC113734623	LOC113736460	LOC113743396	LOC113736460	LOC113719060	LOC113717631	LOC113695174	LOC113711396	LOC113742263	LOC113737000	LOC113711072	LOC113692705	LOC113732495	LOC113739542	LOC113735081	LOC113727493	LOC113726982	LOC113710614	LOC113712847	LOC113706485	LOC113727911	LOC113740314	LOC113694125	LOC113726293	LOC113741368
LOC113730741	LOC113731353	LOC113694152	LOC113718002	LOC113688123	LOC113738055	LOC113701057	LOC113706400	LOC113742663	LOC113715005	LOC113694499	LOC113714747	LOC113701835	LOC113725286	LOC113704217	LOC113695877	LOC113740407	LOC113718705	LOC113736199	LOC113734198	LOC113725347	LOC113690940	LOC113742109	LOC113693583	LOC113706778
LOC113734931	LOC113716787	LOC113731122	LOC113732593	LOC113699995	LOC113719174	LOC113718800	LOC113736911	LOC113689977	LOC113700488	LOC113707970	LOC113716855	LOC113712498	LOC113688089	LOC113709380	LOC113738749	LOC113692705	LOC113740457	LOC113707993	LOC113735081	LOC113700158	LOC113697196	LOC113688371	LOC113741577	LOC113699360
LOC113738055	LOC113722949	LOC113713171	LOC113717264	LOC113692741	LOC113730526	LOC113714510	LOC113743570	LOC113705937	LOC113714421	LOC113727391	LOC113699378	LOC113738042	LOC113731824	LOC113710521	LOC113691116	LOC113729729	LOC113698145	LOC113725431	LOC113695904	LOC113732280	LOC113719838	LOC113716855	LOC113742023	LOC113739667
LOC113719174	LOC113702144	LOC113692345	LOC113701767	LOC113714994	LOC113697813	LOC113707950	LOC113728122	LOC113691712	LOC113732495	LOC113701924	LOC113697952	LOC113688817	LOC113695746	LOC113703952	LOC113739979	LOC113719307	LOC113712416	LOC113739744	LOC113691792	LOC113727391	LOC113740407	LOC113739847	LOC113701670	LOC113719487
LOC113742742	LOC113740007	LOC113692785	LOC113732184	LOC113708547	LOC113731377	LOC113695796	LOC113726974	LOC113698961	LOC113718957	LOC113740112	LOC113691678	LOC113713221	LOC113716855	LOC113692552	LOC113742953	LOC113718705	LOC113694548	LOC113726293	LOC113730545	LOC113729829	LOC113692705	LOC113719307	LOC113734357	LOC113732495
LOC113701718	LOC113701057	LOC113715635	LOC113688916	LOC113693728	LOC113693973	LOC113714747	LOC113709857	LOC113719023	LOC113718552	LOC113706485	LOC113706532	LOC113691301	LOC113699378	LOC113695963	LOC113717631	LOC113698962	LOC113715366	LOC113732592	LOC113715005	LOC113738027	LOC113729729	LOC113731646	LOC113707950	LOC113718552
LOC113742903	LOC113718800	LOC113697227	LOC113736006	LOC113699360	LOC113734998	LOC113729729	LOC113700121	LOC113690967	LOC113715668	LOC113712785	LOC113719461	LOC113737027	LOC113710463	LOC113704588	LOC113722920	LOC113710581	LOC113730063	LOC113701670	LOC113732495	LOC113727211	LOC113701833	LOC113733893	LOC113725432	LOC113712847
LOC113731377	LOC113731865	LOC113732335	LOC113688089	LOC113706993	LOC113716999	LOC113719307	LOC113728035	LOC113692003	LOC113742201	LOC113736302	LOC113706786	LOC113705262	LOC113691639	LOC113732495	LOC113731377	LOC113691678	LOC113725648	LOC113706969	LOC113708956	LOC113695878	LOC113691364	LOC113733952	LOC113729729	LOC113699214
LOC113730363	LOC113717370	LOC113715349	LOC113742162	LOC113732495	LOC113725347	LOC113694731	LOC113726642	LOC113689920	LOC113706479	LOC113695936	LOC113718013	LOC113690829	LOC113698145	LOC113708956	LOC113730363	LOC113706532	LOC113742690	LOC113731527	LOC113738230	LOC113713525	LOC113719307	LOC113725214	LOC113699378	LOC113728216
LOC113738037	LOC113695796	LOC113713221	LOC113726051	LOC113712325	LOC113711072	LOC113698962	LOC113743318	LOC113700121	LOC113699214	LOC113717074	LOC113695271	LOC113742109	LOC113689705	LOC113715668	LOC113692736	LOC113719461	LOC113697477	LOC113707950	LOC113712498	LOC113688123	LOC113699378	LOC113730199	LOC113710463	LOC113724972
LOC113692736	LOC113729729	LOC113741577	LOC113740314	LOC113738230	LOC113727391	LOC113698061	LOC113691658	LOC113715611	LOC113728216	LOC113727201	LOC113688803	LOC113688371	LOC113703757	LOC113742201	LOC113705059	LOC113736973	LOC113717038	LOC113695746	LOC113712847	LOC113692750	LOC113718705	LOC113714498	LOC113730708	LOC113728223
LOC113727911	LOC113701356	LOC113692635	LOC113716319	LOC113718957	LOC113701924	LOC113701676	LOC113693889	LOC113700415	LOC113724972	LOC113691671	LOC113718978	LOC113699317	LOC113742663	LOC113728216	LOC113725347	LOC113701676	LOC113712133	LOC113742524	LOC113701917	LOC113727201	LOC113697952	LOC113736973	LOC113713686	LOC113735913
LOC113711072	LOC113694731	LOC113691301	LOC113725432	LOC113690556	LOC113726027	LOC113692745	LOC113704208	LOC113724760	LOC113726892	LOC113702899	LOC113725507	LOC113730753	LOC113733252	LOC113709365	LOC113711072	LOC113730922	LOC113742901	LOC113692705	LOC113728216	LOC113713349	LOC113698962	LOC113703939	LOC113739541	LOC113716514
LOC113707970	LOC113691603	LOC113726391	LOC113716855	LOC113718552	LOC113736302	LOC113694876	LOC113733292	LOC113723069	LOC113731247	LOC113704217	LOC113714762	LOC113722889	LOC113714986	LOC113733115	LOC113707970	LOC113710264	LOC113740105	LOC113738418	LOC113730060	LOC113702899	LOC113717683	LOC113717031	LOC113740386	LOC113725040
LOC113711772	LOC113697952	LOC113690829	LOC113689705	LOC113706479	LOC113717074	LOC113695271	LOC113702381	LOC113724984	LOC113739542	LOC113733051	LOC113709482	LOC113733080	LOC113700130	LOC113725040	LOC113731732	LOC113725248	LOC113714462	LOC113714747	LOC113692785	LOC113732295	LOC113688279	LOC113735412	LOC113718013	LOC113742109
LOC113701924	LOC113701459	LOC113742109	LOC113688279	LOC113728216	LOC113727201	LOC113725911	LOC113713950	LOC113688163	LOC113701767	LOC113719617	LOC113712463	LOC113716855	LOC113739541	LOC113697792	LOC113711772	LOC113691835	LOC113687987	LOC113729729	LOC113714445	LOC113704210	LOC113713686	LOC113714660	LOC113712416	LOC113727860
LOC113729829	LOC113719461	LOC113740314	LOC113703757	LOC113738236	LOC113730585	LOC113697394	LOC113741344	LOC113742971	LOC113718033	LOC113705956	LOC113727996	LOC113739847	LOC113712209	LOC113697295	LOC113729829	LOC113734796	LOC113718964	LOC113710463	LOC113688817	LOC113691792	LOC113712194	LOC113728207	LOC113689977	LOC113715785
LOC113733173	LOC113713686	LOC113706831	LOC113742263	LOC113729845	LOC113719113	LOC113725507	LOC113707766	LOC113711828	LOC113742217	LOC113697189	LOC113691642	LOC113694772	LOC113711396	LOC113716793	LOC113740112	LOC113714988	LOC113691658	LOC113730708	LOC113725286	LOC113708608	LOC113736973	LOC113736911	LOC113711396	LOC113692705
LOC113727211	LOC113695267	LOC113716319	LOC113730922	LOC113731247	LOC113704217	LOC113707652	LOC113709773	LOC113695194	LOC113716319	LOC113727703	LOC113690967	LOC113738695	LOC113717992	LOC113716791	LOC113726027	LOC113708009	LOC113711883	LOC113713686	LOC113701670	LOC113719113	LOC113719239	LOC113690809	LOC113697267	LOC113730924
LOC113726027	LOC113710264	LOC113730753	LOC113718013	LOC113739542	LOC113740250	LOC113729838	LOC113726864	LOC113708812	LOC113695746	LOC113696166	LOC113704216	LOC113733952	LOC113705937	LOC113713627	LOC113699389	LOC113707252	LOC113717396	LOC113733252	LOC113716514	LOC113733051	LOC113725248	LOC113731222	LOC113697806	LOC113738418
LOC113742135	LOC113725248	LOC113722889	LOC113725248	LOC113732184	LOC113719617	LOC113734796	LOC113714741	LOC113700456	LOC113712042	LOC113708652	LOC113702287	LOC113734706	LOC113733854	LOC113704273	LOC113706485	LOC113691642	LOC113714684	LOC113740386	LOC113725040	LOC113708547	LOC113699299	LOC113688184	LOC113722460	LOC113729729
LOC113738259	LOC113716375	LOC113732192	LOC113711396	LOC113702807	LOC113697189	LOC113727996	LOC113722334	LOC113743262	LOC113697295	LOC113719305	LOC113714462	LOC113712512	LOC113690540	LOC113701459	LOC113712785	LOC113689920	LOC113687933	LOC113710264	LOC113715556	LOC113705956	LOC113700933	LOC113719206	LOC113734157	LOC113725323
LOC113688123	LOC113732567	LOC113712999	LOC113691712	LOC113717998	LOC113693728	LOC113714988	LOC113716943	LOC113730450	LOC113712222	LOC113739562	LOC113715611	LOC113730199	LOC113714762	LOC113700179	LOC113734792	LOC113727805	LOC113730676	LOC113689977	LOC113727736	LOC113697189	LOC113716375	LOC113735263	LOC113696045	LOC113699378
LOC113688276	LOC113713590	LOC113714120	LOC113691482	LOC113730889	LOC113722993	LOC113690967	LOC113742260	LOC113710743	LOC113729729	LOC113727287	LOC113702115	LOC113714066	LOC113719056	LOC113698807	LOC113713525	LOC113717232	LOC113708812	LOC113725248	LOC113697792	LOC113725110	LOC113714988	LOC113712236	LOC113732893	LOC113725239
LOC113717074	LOC113742584	LOC113719307	LOC113725204	LOC113688038	LOC113717706	LOC113689920	LOC113725692	LOC113734980	LOC113702222	LOC113738453	LOC113700415	LOC113703939	LOC113690967	LOC113700495	LOC113688276	LOC113700415	LOC113729053	LOC113718696	LOC113697230	LOC113690583	LOC113707252	LOC113691642	LOC113719023	LOC113691343
LOC113730585	LOC113688341	LOC113694772	LOC113704228	LOC113731865	LOC113696166	LOC113700121	LOC113702777	LOC113692608	LOC113713286	LOC113732430	LOC113734826	LOC113693853	LOC113689920	LOC113703876	LOC113719246	LOC113691942	LOC113708504	LOC113694497	LOC113713837	LOC113696166	LOC113691642	LOC113712133	LOC113734805	LOC113713627
LOC113691792	LOC113707652	LOC113726478	LOC113719056	LOC113742217	LOC113734358	LOC113714462	LOC113727001	LOC113693619	LOC113733813	LOC113699360	LOC113724984	LOC113691732	LOC113727805	LOC113739541	LOC113695936	LOC113734826	LOC113742260	LOC113719056	LOC113727860	LOC113719305	LOC113713860	LOC113692583	LOC113719056	LOC113734023
LOC113708608	LOC113729838	LOC113724937	LOC113719206	LOC113733115	LOC113732774	LOC113715611	LOC113742551	LOC113695038	LOC113701803	LOC113710521	LOC113690721	LOC113706400	LOC113741578	LOC113722999	LOC113717074	LOC113736217	LOC113742551	LOC113734796	LOC113712222	LOC113727287	LOC113690967	LOC113690088	LOC113691642	LOC113697472
LOC113719113	LOC113714988	LOC113702766	LOC113736924	LOC113716514	LOC113719305	LOC113700415	LOC113702323	LOC113740172	LOC113726428	LOC113729300	LOC113714414	LOC113715366	LOC113734455	LOC113742845	LOC113727201	LOC113690813	LOC113742699	LOC113691095	LOC113692705	LOC113727068	LOC113689920	LOC113697936	LOC113690967	LOC113730199
LOC113690394	LOC113691642	LOC113706318	LOC113689920	LOC113689754	LOC113704588	LOC113724984	LOC113712961	LOC113710203	LOC113708073	LOC113702218	LOC113726986	LOC113731222	LOC113715611	LOC113716375	LOC113691792	LOC113698724	LOC113690340	LOC113736924	LOC113730924	LOC113706778	LOC113727805	LOC113718345	LOC113697265	LOC113688279
LOC113733051	LOC113690967	LOC113741256	LOC113694960	LOC113697176	LOC113702384	LOC113701382	LOC113690340	LOC113738762	LOC113704273	LOC113726708	LOC113703602	LOC113717092	LOC113732590	LOC113694548	LOC113690394	LOC113734499	LOC113700007	LOC113732590	LOC113729729	LOC113732430	LOC113710240	LOC113702940	LOC113700121	LOC113727218
LOC113691502	LOC113725543	LOC113695615	LOC113700121	LOC113695746	LOC113740281	LOC113723075	LOC113709684	LOC113712454	LOC113732906	LOC113704588	LOC113695194	LOC113719079	LOC113724984	LOC113702248	LOC113733051	LOC113690721	LOC113735089	LOC113700415	LOC113702222	LOC113699360	LOC113731854	LOC113740105	LOC113702940	LOC113713686
LOC113698562	LOC113689920	LOC113730199	LOC113692352	LOC113726982	LOC113712325	LOC113730094	LOC113708598	LOC113734663	LOC113703876	LOC113742301	LOC113700456	LOC113688139	LOC113730871	LOC113714577	LOC113719617	LOC113729929	LOC113719070	LOC113691942	LOC113725323	LOC113736316	LOC113715335	LOC113702355	LOC113716768	LOC113742263
LOC113709380	LOC113700121	LOC113731959	LOC113707383	LOC113712222	LOC113727319	LOC113695194	LOC113733128	LOC113719137	LOC113727086	LOC113702384	LOC113693737	LOC113730680	LOC113716407	LOC113692416	LOC113709380	LOC113710525	LOC113708816	LOC113736217	LOC113719307	LOC113739999	LOC113702287	LOC113742262	LOC113729929	LOC113743361
LOC113697189	LOC113710240	LOC113695874	LOC113717947	LOC113728076	LOC113730390	LOC113714478	LOC113695835	LOC113697522	LOC113727849	LOC113732495	LOC113733325	LOC113728264	LOC113742920	LOC113731839	LOC113712813	LOC113726986	LOC113694589	LOC113692630	LOC113725239	LOC113698220	LOC113714462	LOC113693889	LOC113703460	LOC113731913
LOC113693728	LOC113717232	LOC113727113	LOC113714462	LOC113702222	LOC113687997	LOC113700456	LOC113722896	LOC113736292	LOC113717031	LOC113730390	LOC113731960	LOC113690228	LOC113741478	LOC113704064	LOC113690583	LOC113703602	LOC113707757	LOC113741478	LOC113703200	LOC113706832	LOC113715611	LOC113716703	LOC113725869	LOC113718013
LOC113727703	LOC113715335	LOC113693853	LOC113732590	LOC113725794	LOC113701835	LOC113716842	LOC113696140	LOC113692755	LOC113687943	LOC113687997	LOC113688243	LOC113736924	LOC113724753	LOC113716846	LOC113703789	LOC113695194	LOC113694333	LOC113725285	LOC113691343	LOC113695963	LOC113691965	LOC113692667	LOC113741478	LOC113722999
LOC113733151	LOC113692352	LOC113710310	LOC113700415	LOC113710463	LOC113731874	LOC113712127	LOC113736780	LOC113710450	LOC113732656	LOC113701835	LOC113717012	LOC113731472	LOC113703602	LOC113741355	LOC113708652	LOC113700456	LOC113722896	LOC113695194	LOC113700990	LOC113742301	LOC113734499	LOC113713232	LOC113733026	LOC113725248
LOC113734358	LOC113719697	LOC113712209	LOC113731209	LOC113703200	LOC113713978	LOC113707831	LOC113732796	LOC113717856	LOC113710282	LOC113702848	LOC113709648	LOC113728035	LOC113695194	LOC113689712	LOC113743222	LOC113725695	LOC113706834	LOC113701867	LOC113713627	LOC113698244	LOC113716892	LOC113740284	LOC113725285	LOC113711979
LOC113741368	LOC113697493	LOC113724738	LOC113691942	LOC113733813	LOC113703932	LOC113709648	LOC113705982	LOC113693621	LOC113707650	LOC113712498	LOC113734210	LOC113703941	LOC113730163	LOC113719056	LOC113692245	LOC113688243	LOC113712382	LOC113730163	LOC113703944	LOC113732495	LOC113729929	LOC113708504	LOC113730163	LOC113704039
LOC113719305	LOC113717947	LOC113731884	LOC113688163	LOC113701803	LOC113694152	LOC113701250	LOC113734067	LOC113736789	LOC113702248	LOC113726596	LOC113702274	LOC113735246	LOC113700456	LOC113702491	LOC113719305	LOC113712127	LOC113732796	LOC113700456	LOC113704273	LOC113727319	LOC113733026	LOC113707766	LOC113700456	LOC113742845
LOC113742729	LOC113715611	LOC113706400	LOC113729929	LOC113713627	LOC113724972	LOC113722575	LOC113731718	LOC113688611	LOC113734022	LOC113725348	LOC113734980	LOC113718964	LOC113688243	LOC113727996	LOC113742729	LOC113717012	LOC113691670	LOC113688243	LOC113703876	LOC113716253	LOC113695194	LOC113722334	LOC113702889	LOC113687914
LOC113739562	LOC113700415	LOC113715366	LOC113725285	LOC113726428	LOC113713171	LOC113733101	LOC113706991	LOC113698525	LOC113692416	LOC113731346	LOC113700368	LOC113742920	LOC113707766	LOC113693646	LOC113739562	LOC113709648	LOC113734067	LOC113697431	LOC113727633	LOC113736460	LOC113708812	LOC113693812	LOC113703106	LOC113716375
LOC113725759	LOC113691942	LOC113730063	LOC113728081	LOC113697952	LOC113734052	LOC113734980	LOC113704050	LOC113741698	LOC113734088	LOC113688367	LOC113740172	LOC113732298	LOC113704992	LOC113691642	LOC113727287	LOC113699016	LOC113692396	LOC113741590	LOC113740441	LOC113690556	LOC113701867	LOC113709234	LOC113707766	LOC113742026
LOC113706778	LOC113734826	LOC113736911	LOC113692715	LOC113727566	LOC113694677	LOC113700368	LOC113743402	LOC113734084	LOC113701417	LOC113724972	LOC113700207	LOC113719477	LOC113709514	LOC113698654	LOC113738453	LOC113724974	LOC113739853	LOC113710743	LOC113743361	LOC113712498	LOC113700456	LOC113702777	LOC113709514	LOC113702248
LOC113699360	LOC113734499	LOC113742690	LOC113708812	LOC113712210	LOC113731542	LOC113726510	LOC113727527	LOC113713358	LOC113731562	LOC113713171	LOC113738478	LOC113693889	LOC113736620	LOC113690967	LOC113706565	LOC113692710	LOC113732569	LOC113732781	LOC113687943	LOC113738001	LOC113688243	LOC113729943	LOC113730450	LOC113701417
LOC113694138	LOC113701323	LOC113739928	LOC113731511	LOC113708073	LOC113718626	LOC113734415	LOC113714613	LOC113724743	LOC113724904	LOC113692781	LOC113736785	LOC113698293	LOC113709923	LOC113697611	LOC113695931	LOC113689813	LOC113727499	LOC113734980	LOC113718013	LOC113688164	LOC113717012	LOC113731658	LOC113692206	LOC113706891
LOC113692604	LOC113701382	LOC113709482	LOC113688907	LOC113710195	LOC113726785	LOC113730594	LOC113706674	LOC113704050	LOC113713384	LOC113694677	LOC113706490	LOC113730676	LOC113691493	LOC113736924	LOC113732430	LOC113734980	LOC113729783	LOC113712925	LOC113739540	LOC113703131	LOC113699016	LOC113725081	LOC113710743	LOC113713590
LOC113695372	LOC113716892	LOC113707982	LOC113711725	LOC113701459	LOC113709405	LOC113740172	LOC113714818	LOC113727313	LOC113733269	LOC113731004	LOC113701954	LOC113704208	LOC113736785	LOC113700121	LOC113699360	LOC113700368	LOC113741698	LOC113731553	LOC113711979	LOC113717769	LOC113704073	LOC113695745	LOC113743709	LOC113719135
LOC113688070	LOC113729929	LOC113726974	LOC113743709	LOC113734023	LOC113714364	LOC113708283	LOC113740437	LOC113694549	LOC113720659	LOC113704025	LOC113689762	LOC113703602	LOC113712454	LOC113710491	LOC113694138	LOC113732907	LOC113692821	LOC113714706	LOC113711396	LOC113731122	LOC113724974	LOC113742699	LOC113706801	LOC113713028
LOC113743348	LOC113723075	LOC113733269	LOC113742260	LOC113698807	LOC113732712	LOC113727149	LOC113714553	LOC113716801	LOC113713709	LOC113718626	LOC113734663	LOC113708812	LOC113743496	LOC113688189	LOC113692604	LOC113701188	LOC113702250	LOC113693781	LOC113687914	LOC113724972	LOC113734980	LOC113692226	LOC113712925	LOC113697899
LOC113732790	LOC113732084	LOC113728264	LOC113734980	LOC113688816	LOC113738236	LOC113703516	LOC113706039	LOC113724891	LOC113704662	LOC113695174	LOC113742803	LOC113698738	LOC113689762	LOC113693756	LOC113697915	LOC113697299	LOC113688846	LOC113709923	LOC113734088	LOC113702226	LOC113703320	LOC113703516	LOC113731553	LOC113693918
LOC113706832	LOC113714478	LOC113726457	LOC113693759	LOC113725266	LOC113731579	LOC113700207	LOC113688773	LOC113705550	LOC113736924	LOC113709405	LOC113707757	LOC113702381	LOC113734663	LOC113709999	LOC113739999	LOC113713500	LOC113690219	LOC113730600	LOC113722460	LOC113692781	LOC113700368	LOC113739973	LOC113700952	LOC113689712
LOC113695963	LOC113700456	LOC113705522	LOC113726866	LOC113727086	LOC113739542	LOC113731887	LOC113711849	LOC113727460	LOC113742909	LOC113692824	LOC113698371	LOC113731511	LOC113708829	LOC113736217	LOC113690524	LOC113690340	LOC113691358	LOC113707295	LOC113697950	LOC113720289	LOC113726510	LOC113690340	LOC113693619	LOC113706719
LOC113704588	LOC113717012	LOC113717326	LOC113693619	LOC113717031	LOC113688040	LOC113730600	LOC113705552	LOC113704132	LOC113722453	LOC113712749	LOC113694328	LOC113734079	LOC113706586	LOC113699232	LOC113726708	LOC113731887	LOC113702202	LOC113700007	LOC113734558	LOC113692785	LOC113695745	LOC113726060	LOC113693998	LOC113688139
LOC113698244	LOC113704150	LOC113690528	LOC113695038	LOC113739541	LOC113703950	LOC113699343	LOC113712314	LOC113742888	LOC113700121	LOC113733996	LOC113699202	LOC113719183	LOC113707757	LOC113702355	LOC113725737	LOC113730600	LOC113740018	LOC113710203	LOC113706719	LOC113688543	LOC113697761	LOC113702292	LOC113708785	LOC113742576
LOC113711948	LOC113722575	LOC113724881	LOC113704032	LOC113707474	LOC113736006	LOC113701954	LOC113707444	LOC113688133	LOC113741578	LOC113714729	LOC113712622	LOC113707766	LOC113725599	LOC113701382	LOC113727319	LOC113710223	LOC113731126	LOC113705568	LOC113714762	LOC113698403	LOC113740172	LOC113695876	LOC113740023	LOC113729922
LOC113719487	LOC113692710	LOC113700121	LOC113730600	LOC113687943	LOC113725077	LOC113713708	LOC113730044	LOC113730630	LOC113724951	LOC113710155	LOC113731200	LOC113707831	LOC113736932	LOC113695072	LOC113687997	LOC113727596	LOC113706674	LOC113736785	LOC113733257	LOC113728223	LOC113697299	LOC113700007	LOC113707295	LOC113698654
LOC113740281	LOC113734980	LOC113728035	LOC113730698	LOC113722999	LOC113691301	LOC113734663	LOC113739966	LOC113719412	LOC113717947	LOC113739542	LOC113693621	LOC113739845	LOC113693805	LOC113725007	LOC113738230	LOC113697905	LOC113736919	LOC113712454	LOC113733269	LOC113709405	LOC113713500	LOC113730454	LOC113691493	LOC113710997
LOC113727319	LOC113732412	LOC113726642	LOC113691493	LOC113733835	LOC113704762	LOC113742803	LOC113701760	LOC113742620	LOC113688514	LOC113736649	LOC113702239	LOC113693757	LOC113719137	LOC113692630	LOC113694152	LOC113736785	LOC113709230	LOC113713708	LOC113730082	LOC113739744	LOC113695805	LOC113694589	LOC113736785	LOC113730764
LOC113730390	LOC113703320	LOC113712259	LOC113701136	LOC113713608	LOC113727814	LOC113698371	LOC113704326	LOC113695709	LOC113702355	LOC113732553	LOC113724866	LOC113714741	LOC113699377	LOC113696124	LOC113731346	LOC113707723	LOC113741718	LOC113734663	LOC113730764	LOC113712843	LOC113730600	LOC113707631	LOC113692104	LOC113742718
LOC113730694	LOC113741770	LOC113724903	LOC113712454	LOC113725248	LOC113714675	LOC113703094	LOC113693880	LOC113697172	LOC113693743	LOC113738477	LOC113732102	LOC113722334	LOC113705982	LOC113708668	LOC113714355	LOC113712184	LOC113712221	LOC113731532	LOC113713432	LOC113726293	LOC113700007	LOC113701445	LOC113706490	LOC113722453
LOC113687997	LOC113740172	LOC113725122	LOC113730456	LOC113736398	LOC113703663	LOC113707249	LOC113723001	LOC113733050	LOC113691662	LOC113694118	LOC113739853	LOC113727131	LOC113715625	LOC113704278	LOC113712847	LOC113693736	LOC113710250	LOC113708829	LOC113705377	LOC113714729	LOC113736785	LOC113742803	LOC113713708	LOC113700121
LOC113701835	LOC113713500	LOC113730111	LOC113713708	LOC113741738	LOC113741281	LOC113740071	LOC113696146	LOC113701470	LOC113701382	LOC113703950	LOC113727704	LOC113710276	LOC113717856	LOC113695194	LOC113688367	LOC113734663	LOC113711849	LOC113707757	LOC113689920	LOC113714364	LOC113712454	LOC113707757	LOC113691878	LOC113715335
LOC113738230	LOC113727149	LOC113703941	LOC113688619	LOC113707650	LOC113714746	LOC113714584	LOC113720553	LOC113742840	LOC113724988	LOC113726522	LOC113738485	LOC113704354	LOC113693621	LOC113702889	LOC113724972	LOC113707757	LOC113695889	LOC113717855	LOC113699785	LOC113715349	LOC113690952	LOC113710207	LOC113708829	LOC113699785
LOC113736460	LOC113704005	LOC113687987	LOC113731532	LOC113691712	LOC113725040	LOC113693621	LOC113701470	LOC113735216	LOC113732523	LOC113732599	LOC113690219	LOC113739824	LOC113732925	LOC113738626	LOC113702226	LOC113743040	LOC113695763	LOC113691707	LOC113724951	LOC113710155	LOC113693736	LOC113736780	LOC113707757	LOC113728164
LOC113703932	LOC113703516	LOC113691942	LOC113698371	LOC113702248	LOC113699160	LOC113724866	LOC113726560	LOC113699047	LOC113703947	LOC113730657	LOC113732331	LOC113712925	LOC113732102	LOC113717012	LOC113720289	LOC113719137	LOC113718914	LOC113736225	LOC113709671	LOC113742866	LOC113689762	LOC113739998	LOC113725599	LOC113700415
LOC113725348	LOC113738478	LOC113710333	LOC113717855	LOC113689827	LOC113690829	LOC113732102	LOC113716815	LOC113710746	LOC113704229	LOC113730889	LOC113725078	LOC113727001	LOC113690408	LOC113730995	LOC113692345	LOC113727425	LOC113716738	LOC113736932	LOC113728164	LOC113688346	LOC113734663	LOC113732796	LOC113739827	LOC113730873
LOC113709675	LOC113693736	LOC113723069	LOC113736225	LOC113713256	LOC113697176	LOC113701955	LOC113695631	LOC113697450	LOC113709109	LOC113741577	LOC113706657	LOC113742551	LOC113739853	LOC113706286	LOC113717846	LOC113734909	LOC113734405	LOC113714527	LOC113700415	LOC113738477	LOC113743040	LOC113705982	LOC113736292	LOC113734826
LOC113694152	LOC113722574	LOC113731521	LOC113714527	LOC113701417	LOC113725671	LOC113736789	LOC113742534	LOC113742783	LOC113692630	LOC113730226	LOC113707057	LOC113725081	LOC113698525	LOC113708808	LOC113729566	LOC113736780	LOC113742847	LOC113709876	LOC113709999	LOC113738212	LOC113698024	LOC113740192	LOC113738558	LOC113702355
LOC113714355	LOC113707757	LOC113718964	LOC113736292	LOC113689712	LOC113725450	LOC113727499	LOC113712659	LOC113742157	LOC113711883	LOC113691301	LOC113705073	LOC113696123	LOC113722982	LOC113705370	LOC113688543	LOC113712479	LOC113723001	LOC113693621	LOC113734826	LOC113732599	LOC113734909	LOC113701904	LOC113688194	LOC113701382
LOC113710902	LOC113707249	LOC113697973	LOC113701117	LOC113725813	LOC113740314	LOC113711017	LOC113717243	LOC113736768	LOC113696124	LOC113694125	LOC113701331	LOC113703516	LOC113726965	LOC113733036	LOC113728223	LOC113704142	LOC113739573	LOC113702374	LOC113691658	LOC113730889	LOC113695906	LOC113704371	LOC113700076	LOC113729929
LOC113727920	LOC113705482	LOC113727135	LOC113738558	LOC113714762	LOC113719126	LOC113714297	LOC113741403	LOC113731420	LOC113726986	LOC113741281	LOC113736347	LOC113690340	LOC113694910	LOC113740084	LOC113741205	LOC113699202	LOC113726560	LOC113732102	LOC113701382	LOC113741577	LOC113740071	LOC113701809	LOC113698749	LOC113703947
LOC113727572	LOC113700441	LOC113690538	LOC113710450	LOC113731461	LOC113740264	LOC113719645	LOC113736472	LOC113696246	LOC113688975	LOC113706547	LOC113697850	LOC113712677	LOC113734084	LOC113732697	LOC113708590	LOC113710289	LOC113695631	LOC113739853	LOC113716892	LOC113730874	LOC113700076	LOC113717856	LOC113716813	LOC113703460
LOC113731704	LOC113726569	LOC113714684	LOC113688194	LOC113688139	LOC113738056	LOC113699356	LOC113728455	LOC113742191	LOC113730094	LOC113717021	LOC113729893	LOC113710444	LOC113713358	LOC113736716	LOC113709405	LOC113694010	LOC113696095	LOC113732569	LOC113729929	LOC113725077	LOC113695371	LOC113726628	LOC113743270	LOC113716734
LOC113731122	LOC113731200	LOC113731954	LOC113713051	LOC113727996	LOC113716319	LOC113705469	LOC113736605	LOC113712904	LOC113699011	LOC113742784	LOC113722924	LOC113708816	LOC113707363	LOC113702274	LOC113692824	LOC113702239	LOC113739843	LOC113736789	LOC113725007	LOC113733307	LOC113711863	LOC113732102	LOC113736789	LOC113708668
LOC113730060	LOC113714584	LOC113698293	LOC113732596	LOC113731562	LOC113695746	LOC113725078	LOC113698066	LOC113694253	LOC113727886	LOC113739693	LOC113737993	LOC113733128	LOC113726004	LOC113734980	LOC113717155	LOC113724866	LOC113712421	LOC113695068	LOC113726026	LOC113715107	LOC113714584	LOC113739853	LOC113698525	LOC113701746
LOC113725289	LOC113724866	LOC113733292	LOC113702374	LOC113733269	LOC113693780	LOC113736474	LOC113714593	LOC113713367	LOC113738043	LOC113742908	LOC113698739	LOC113695835	LOC113727313	LOC113732412	LOC113697227	LOC113715265	LOC113733097	LOC113698525	LOC113710940	LOC113704762	LOC113690121	LOC113710895	LOC113691623	LOC113717405
LOC113734052	LOC113715265	LOC113708812	LOC113716813	LOC113730082	LOC113690399	LOC113706980	LOC113703964	LOC113742332	LOC113695194	LOC113724908	LOC113725601	LOC113717263	LOC113707057	LOC113703713	LOC113714729	LOC113732102	LOC113727462	LOC113726692	LOC113719500	LOC113727814	LOC113693621	LOC113728747	LOC113734084	LOC113712072
LOC113692781	LOC113743270	LOC113697821	LOC113688611	LOC113713709	LOC113726982	LOC113702412	LOC113736582	LOC113693923	LOC113723048	LOC113699160	LOC113695820	LOC113701445	LOC113695152	LOC113696123	LOC113714364	LOC113739853	LOC113712909	LOC113734084	LOC113716734	LOC113694125	LOC113694010	LOC113710275	LOC113704050	LOC113730163
LOC113712750	LOC113711017	LOC113713950	LOC113741698	LOC113705377	LOC113691583	LOC113736347	LOC113689860	LOC113727509	LOC113716908	LOC113715759	LOC113701470	LOC113742575	LOC113701222	LOC113705647	LOC113710155	LOC113736789	LOC113739577	LOC113692661	LOC113699011	LOC113703663	LOC113740052	LOC113702202	LOC113727313	LOC113700456
LOC113694677	LOC113719645	LOC113728074	LOC113712407	LOC113689920	LOC113734238	LOC113712187	LOC113694253	LOC113716391	LOC113730836	LOC113742109	LOC113708571	LOC113716637	LOC113734997	LOC113725569	LOC113688817	LOC113729831	LOC113742065	LOC113726004	LOC113734012	LOC113741281	LOC113743270	LOC113727924	LOC113694549	LOC113705210
LOC113692345	LOC113726619	LOC113726648	LOC113719645	LOC113722453	LOC113708033	LOC113730630	LOC113688218	LOC113700127	LOC113693737	LOC113697176	LOC113701261	LOC113742803	LOC113727460	LOC113697761	LOC113697270	LOC113727704	LOC113735949	LOC113704050	LOC113704278	LOC113714746	LOC113736789	LOC113738148	LOC113702233	LOC113741344
LOC113728223	LOC113739710	LOC113691402	LOC113724743	LOC113700121	LOC113740120	LOC113691813	LOC113712571	LOC113736647	LOC113719183	LOC113688371	LOC113691328	LOC113698758	LOC113698698	LOC113697299	LOC113742866	LOC113718921	LOC113717570	LOC113697186	LOC113738082	LOC113701670	LOC113729831	LOC113706674	LOC113713222	LOC113695276
LOC113731004	LOC113699356	LOC113741344	LOC113694549	LOC113741578	LOC113702222	LOC113716896	LOC113688129	LOC113734761	LOC113699420	LOC113697487	LOC113693806	LOC113707757	LOC113688773	LOC113704032	LOC113688346	LOC113712407	LOC113735257	LOC113693888	LOC113723515	LOC113739658	LOC113718921	LOC113725332	LOC113706980	LOC113703106
LOC113731542	LOC113705469	LOC113707766	LOC113707728	LOC113708251	LOC113702743	LOC113712381	LOC113704403	LOC113729862	LOC113708808	LOC113731231	LOC113727146	LOC113722896	LOC113724529	LOC113718048	LOC113732553	LOC113743641	LOC113690418	LOC113712889	LOC113707153	LOC113706969	LOC113690219	LOC113691985	LOC113707728	LOC113708737
LOC113718626	LOC113689988	LOC113707831	LOC113705550	LOC113724951	LOC113726734	LOC113730930	LOC113742332	LOC113716489	LOC113730450	LOC113702262	LOC113704054	LOC113706834	LOC113730630	LOC113731570	LOC113734814	LOC113705469	LOC113714685	LOC113697229	LOC113741344	LOC113709365	LOC113719645	LOC113697054	LOC113731600	LOC113712185
LOC113726785	LOC113693863	LOC113694530	LOC113697941	LOC113717947	LOC113706854	LOC113715927	LOC113693923	LOC113705652	LOC113693757	LOC113719126	LOC113733473	LOC113739998	LOC113741336	LOC113710193	LOC113738212	LOC113736474	LOC113707935	LOC113738148	LOC113688635	LOC113742266	LOC113736352	LOC113698698	LOC113712264	LOC113697195
LOC113742523	LOC113736474	LOC113731760	LOC113699143	LOC113717335	LOC113697443	LOC113742840	LOC113699269	LOC113732951	LOC113710276	LOC113740264	LOC113708957	LOC113732796	LOC113699230	LOC113718979	LOC113730657	LOC113702223	LOC113699144	LOC113701222	LOC113695276	LOC113733115	LOC113736474	LOC113698157	LOC113738148	LOC113734980
LOC113726293	LOC113706980	LOC113707423	LOC113730476	LOC113728164	LOC113716855	LOC113708571	LOC113722905	LOC113734340	LOC113736716	LOC113710259	LOC113703948	LOC113732480	LOC113707824	LOC113740581	LOC113729648	LOC113736411	LOC113701336	LOC113727460	LOC113726998	LOC113694047	LOC113712889	LOC113688773	LOC113725623	LOC113692608
LOC113733996	LOC113705073	LOC113725946	LOC113697091	LOC113731707	LOC113719307	LOC113701261	LOC113690762	LOC113702015	LOC113734980	LOC113697196	LOC113704749	LOC113691670	LOC113739880	LOC113690340	LOC113740771	LOC113690924	LOC113731994	LOC113697941	LOC113731760	LOC113699160	LOC113715618	LOC113741718	LOC113701331	LOC113741770
LOC113714729	LOC113712889	LOC113722334	LOC113719593	LOC113700415	LOC113694772	LOC113703890	LOC113697577	LOC113691082	LOC113725915	LOC113725271	LOC113697827	LOC113734067	LOC113695709	LOC113726060	LOC113730889	LOC113727460	LOC113736809	LOC113688133	LOC113710276	LOC113715759	LOC113693993	LOC113710250	LOC113701222	LOC113714706
LOC113714364	LOC113715618	LOC113716943	LOC113706289	LOC113688189	LOC113726478	LOC113691328	LOC113705251	LOC113719296	LOC113729973	LOC113736794	LOC113738570	LOC113694477	LOC113712769	LOC113690404	LOC113741577	LOC113703583	LOC113688924	LOC113699143	LOC113697195	LOC113742109	LOC113701331	LOC113711849	LOC113734997	LOC113715437
LOC113732712	LOC113693866	LOC113704354	LOC113730630	LOC113693756	LOC113694731	LOC113732841	LOC113696185	LOC113697015	LOC113709751	LOC113726982	LOC113696246	LOC113743662	LOC113715681	LOC113700007	LOC113725077	LOC113736347	LOC113705251	LOC113688773	LOC113734980	LOC113725274	LOC113693866	LOC113730466	LOC113731595	LOC113727306
LOC113734099	LOC113698698	LOC113732412	LOC113716395	LOC113717305	LOC113719463	LOC113707148	LOC113709088	LOC113695921	LOC113705647	LOC113740120	LOC113705663	LOC113739770	LOC113694219	LOC113715176	LOC113733307	LOC113712187	LOC113690274	LOC113697091	LOC113731553	LOC113694680	LOC113728230	LOC113741568	LOC113718987	LOC113699398
LOC113731247	LOC113727481	LOC113710496	LOC113702658	LOC113735246	LOC113734937	LOC113712423	LOC113731941	LOC113738124	LOC113704128	LOC113730924	LOC113715659	LOC113705631	LOC113696146	LOC113734295	LOC113691301	LOC113697850	LOC113712576	LOC113730630	LOC113708638	LOC113725450	LOC113734300	LOC113723001	LOC113688133	LOC113693998
LOC113710155	LOC113741718	LOC113741770	LOC113707824	LOC113736217	LOC113700010	LOC113712421	LOC113734433	LOC113696275	LOC113725853	LOC113712999	LOC113736779	LOC113693925	LOC113697172	LOC113734819	LOC113704762	LOC113692116	LOC113742114	LOC113741336	LOC113705425	LOC113706698	LOC113702412	LOC113708922	LOC113699143	LOC113688832
LOC113697270	LOC113736347	LOC113702777	LOC113742620	LOC113734499	LOC113712998	LOC113699075	LOC113736758	LOC113712607	LOC113725569	LOC113710284	LOC113722960	LOC113717316	LOC113732927	LOC113736785	LOC113727814	LOC113707768	LOC113708369	LOC113734322	LOC113741770	LOC113688234	LOC113712187	LOC113699399	LOC113688773	LOC113702675
LOC113742866	LOC113730630	LOC113742551	LOC113727349	LOC113691662	LOC113723092	LOC113726953	LOC113692833	LOC113713312	LOC113725668	LOC113697443	LOC113698016	LOC113698755	LOC113732183	LOC113712184	LOC113714675	LOC113691813	LOC113709088	LOC113710243	LOC113703713	LOC113702305	LOC113699624	LOC113717328	LOC113697091	LOC113725569
LOC113737010	LOC113695980	LOC113714932	LOC113711033	LOC113691658	LOC113688998	LOC113738614	LOC113732151	LOC113718985	LOC113704032	LOC113716855	LOC113740317	LOC113739853	LOC113707148	LOC113731460	LOC113694125	LOC113699304	LOC113695900	LOC113699230	LOC113715437	LOC113731824	LOC113716395	LOC113735216	LOC113706289	LOC113725194
LOC113688040	LOC113707444	LOC113731658	LOC113717608	LOC113701382	LOC113727325	LOC113741300	LOC113706768	LOC113730599	LOC113708785	LOC113725794	LOC113703597	LOC113693987	LOC113710294	LOC113725259	LOC113741281	LOC113743539	LOC113719178	LOC113734917	LOC113699398	LOC113714438	LOC113707444	LOC113707421	LOC113712187	LOC113697299
LOC113703950	LOC113691813	LOC113690878	LOC113696146	LOC113718687	LOC113702232	LOC113702416	LOC113710232	LOC113733054	LOC113731570	LOC113710463	LOC113713822	LOC113695068	LOC113715594	LOC113708829	LOC113701670	LOC113716896	LOC113702176	LOC113712769	LOC113709923	LOC113719126	LOC113701776	LOC113739843	LOC113703098	LOC113713500
LOC113732599	LOC113699304	LOC113695745	LOC113697172	LOC113732523	LOC113708650	LOC113729902	LOC113699983	LOC113690767	LOC113710193	LOC113733893	LOC113702939	LOC113729783	LOC113713277	LOC113707757	LOC113726391	LOC113737993	LOC113736758	LOC113693820	LOC113697299	LOC113690940	LOC113707768	LOC113696072	LOC113716395	LOC113725806
LOC113730657	LOC113743539	LOC113702675	LOC113701470	LOC113729929	LOC113732251	LOC113736605	LOC113736373	LOC113694951	LOC113731376	LOC113713024	LOC113736809	LOC113712595	LOC113703909	LOC113730286	LOC113706969	LOC113711982	LOC113699066	LOC113688321	LOC113713500	LOC113725545	LOC113729893	LOC113703972	LOC113707824	LOC113733200
LOC113730889	LOC113737993	LOC113702114	LOC113732765	LOC113700064	LOC113711842	LOC113738570	LOC113719293	LOC113726403	LOC113690340	LOC113719463	LOC113716743	LOC113727610	LOC113695915	LOC113726528	LOC113698618	LOC113706881	LOC113724777	LOC113701340	LOC113704032	LOC113707950	LOC113722924	LOC113733097	LOC113742731	LOC113727591
LOC113741577	LOC113695709	LOC113731589	LOC113731946	LOC113704229	LOC113739167	LOC113696246	LOC113698098	LOC113725018	LOC113742810	LOC113734937	LOC113707463	LOC113731718	LOC113703340	LOC113728016	LOC113725040	LOC113695709	LOC113701698	LOC113717328	LOC113733200	LOC113724395	LOC113743539	LOC113734934	LOC113701776	LOC113731570
LOC113725077	LOC113698739	LOC113697299	LOC113699047	LOC113696124	LOC113715522	LOC113690778	LOC113712517	LOC113731011	LOC113707295	LOC113725740	LOC113732951	LOC113714297	LOC113736676	LOC113735620	LOC113715759	LOC113725601	LOC113742558	LOC113712109	LOC113727591	LOC113697196	LOC113716896	LOC113712659	LOC113740421	LOC113693678
LOC113709626	LOC113710156	LOC113742699	LOC113735097	LOC113726986	LOC113730199	LOC113742191	LOC113741354	LOC113725934	LOC113732219	LOC113732421	LOC113732150	LOC113706991	LOC113727756	LOC113706922	LOC113732288	LOC113715927	LOC113688575	LOC113732183	LOC113739973	LOC113725271	LOC113711982	LOC113695294	LOC113695709	LOC113731376
LOC113704762	LOC113715927	LOC113712961	LOC113730404	LOC113688975	LOC113716880	LOC113705663	LOC113703599	LOC113725923	LOC113735089	LOC113734943	LOC113699192	LOC113722523	LOC113736768	LOC113742807	LOC113742109	LOC113741568	LOC113705575	LOC113735216	LOC113690340	LOC113736794	LOC113706881	LOC113695778	LOC113697172	LOC113690340
LOC113691587	LOC113695820	LOC113707013	LOC113713277	LOC113708668	LOC113703876	LOC113707161	LOC113694805	LOC113710186	LOC113738478	LOC113733813	LOC113690588	LOC113693993	LOC113718277	LOC113690276	LOC113706698	LOC113730580	LOC113698713	LOC113707148	LOC113742810	LOC113731958	LOC113695709	LOC113714440	LOC113726115	LOC113742810
LOC113727814	LOC113741568	LOC113734731	LOC113718838	LOC113738043	LOC113697510	LOC113714439	LOC113699018	LOC113690760	LOC113732444	LOC113691639	LOC113734976	LOC113735199	LOC113731933	LOC113706921	LOC113688371	LOC113703890	LOC113734766	LOC113733289	LOC113734809	LOC113728037	LOC113715927	LOC113692046	LOC113715787	LOC113707295
LOC113731321	LOC113730580	LOC113709684	LOC113703909	LOC113740284	LOC113700165	LOC113698016	LOC113696100	LOC113725494	LOC113715775	LOC113689776	LOC113712058	LOC113697923	LOC113704052	LOC113735707	LOC113714438	LOC113735216	LOC113703902	LOC113710294	LOC113736785	LOC113690399	LOC113741568	LOC113734638	LOC113726287	LOC113714426
LOC113714675	LOC113703890	LOC113707295	LOC113742783	LOC113695194	LOC113742663	LOC113693923	LOC113714482	LOC113740323	LOC113702096	LOC113703944	LOC113705245	LOC113699355	LOC113696246	LOC113701246	LOC113714510	LOC113691328	LOC113712290	LOC113692610	LOC113742643	LOC113707307	LOC113739937	LOC113728129	LOC113688204	LOC113736785
LOC113694125	LOC113691328	LOC113708598	LOC113725288	LOC113723048	LOC113732827	LOC113688483	LOC113712068	LOC113740389	LOC113719282	LOC113731789	LOC113727223	LOC113726808	LOC113727132	LOC113713753	LOC113731231	LOC113735097	LOC113742221	LOC113699075	LOC113733883	LOC113691583	LOC113742840	LOC113690418	LOC113699564	LOC113743479
LOC113703663	LOC113735097	LOC113739971	LOC113742157	LOC113708812	LOC113690947	LOC113702939	LOC113708090	LOC113723071	LOC113703094	LOC113712124	LOC113692528	LOC113688773	LOC113703991	LOC113728083	LOC113697230	LOC113732841	LOC113722972	LOC113715594	LOC113713708	LOC113722889	LOC113698921	LOC113726991	LOC113731847	LOC113701900
LOC113722851	LOC113730284	LOC113731635	LOC113708579	LOC113703312	LOC113739541	LOC113710915	LOC113703792	LOC113717304	LOC113698512	LOC113700179	LOC113736354	LOC113710250	LOC113705663	LOC113730230	LOC113702262	LOC113730284	LOC113722937	LOC113713277	LOC113702410	LOC113731436	LOC113731072	LOC113726670	LOC113697450	LOC113726637
LOC113733174	LOC113734897	LOC113719070	LOC113695294	LOC113716908	LOC113703949	LOC113734761	LOC113732506	LOC113716447	LOC113722896	LOC113708650	LOC113708694	LOC113700110	LOC113699536	LOC113706945	LOC113713313	LOC113707148	LOC113725056	LOC113703909	LOC113691284	LOC113730924	LOC113703890	LOC113736605	LOC113713277	LOC113742643
LOC113694047	LOC113716094	LOC113690519	LOC113718096	LOC113712072	LOC113698165	LOC113732951	LOC113734965	LOC113732877	LOC113742807	LOC113740590	LOC113718022	LOC113701789	LOC113727877	LOC113705241	LOC113691002	LOC113688254	LOC113725771	LOC113712909	LOC113719282	LOC113729729	LOC113735216	LOC113703964	LOC113718838	LOC113732444
LOC113691312	LOC113712421	LOC113742575	LOC113731933	LOC113730163	LOC113688510	LOC113696233	LOC113703542	LOC113731502	LOC113706921	LOC113732918	LOC113699983	LOC113717321	LOC113740317	LOC113694010	LOC113707950	LOC113712423	LOC113692053	LOC113706972	LOC113707757	LOC113702222	LOC113691328	LOC113703991	LOC113736676	LOC113712804
LOC113716136	LOC113710421	LOC113706688	LOC113741300	LOC113691402	LOC113732082	LOC113734976	LOC113696096	LOC113694640	LOC113690309	LOC113739167	LOC113694228	LOC113730044	LOC113725297	LOC113734460	LOC113695746	LOC113704054	LOC113720368	LOC113727756	LOC113730286	LOC113702743	LOC113707148	LOC113707935	LOC113698601	LOC113733883
LOC113725040	LOC113738614	LOC113717546	LOC113712945	LOC113726657	LOC113733835	LOC113726000	LOC113690430	LOC113727865	LOC113713234	LOC113730199	LOC113732638	LOC113736201	LOC113742332	LOC113717316	LOC113730283	LOC113703340	LOC113712068	LOC113742157	LOC113722896	LOC113732192	LOC113734897	LOC113702149	LOC113706972	LOC113696022
LOC113731813	LOC113722941	LOC113707428	LOC113734519	LOC113719183	LOC113742626	LOC113702176	LOC113737069	LOC113701840	LOC113713181	LOC113738130	LOC113700103	LOC113716738	LOC113712812	LOC113702239	LOC113725271	LOC113732001	LOC113726260	LOC113708579	LOC113696140	LOC113717280	LOC113716094	LOC113699144	LOC113742157	LOC113731364
LOC113742162	LOC113703948	LOC113692303	LOC113714548	LOC113730450	LOC113739540	LOC113712470	LOC113726614	LOC113726865	LOC113710374	LOC113714805	LOC113734462	LOC113730441	LOC113702024	LOC113709229	LOC113712437	LOC113703948	LOC113726733	LOC113727284	LOC113690276	LOC113726734	LOC113712153	LOC113701336	LOC113727789	LOC113702410
LOC113699160	LOC113697297	LOC113726914	LOC113696246	LOC113705370	LOC113712416	LOC113704016	LOC113743378	LOC113729836	LOC113715214	LOC113714066	LOC113710347	LOC113693880	LOC113716391	LOC113729831	LOC113726982	LOC113741300	LOC113738575	LOC113717919	LOC113714648	LOC113706854	LOC113717346	LOC113695899	LOC113735227	LOC113707757
LOC113690829	LOC113741300	LOC113699953	LOC113690778	LOC113733036	LOC113732284	LOC113736354	LOC113693849	LOC113727189	LOC113730230	LOC113733019	LOC113697101	LOC113739573	LOC113705652	LOC113711017	LOC113740407	LOC113693609	LOC113696011	LOC113704052	LOC113690309	LOC113710284	LOC113703948	LOC113692846	LOC113692013	LOC113714678
LOC113742109	LOC113692046	LOC113722896	LOC113742191	LOC113693757	LOC113727113	LOC113730668	LOC113694904	LOC113690025	LOC113706945	LOC113714498	LOC113705141	LOC113706835	LOC113732951	LOC113728747	LOC113740120	LOC113712945	LOC113722738	LOC113714548	LOC113738558	LOC113714120	LOC113727284	LOC113704403	LOC113731360	LOC113717855
LOC113697176	LOC113693609	LOC113710207	LOC113710993	LOC113692711	LOC113727638	LOC113732887	LOC113727725	LOC113727684	LOC113702382	LOC113687712	LOC113695179	LOC113695121	LOC113699001	LOC113715584	LOC113722889	LOC113717919	LOC113734990	LOC113727690	LOC113735707	LOC113699352	LOC113741300	LOC113693923	LOC113734519	LOC113728016
LOC113717704	LOC113714548	LOC113701117	LOC113716981	LOC113711725	LOC113710310	LOC113699983	LOC113694077	LOC113716824	LOC113698502	LOC113728132	LOC113725723	LOC113695631	LOC113696264	LOC113719645	LOC113730924	LOC113714548	LOC113695090	LOC113731420	LOC113701246	LOC113699378	LOC113692046	LOC113688111	LOC113725782	LOC113699953
LOC113706698	LOC113698239	LOC113712382	LOC113730164	LOC113732697	LOC113719295	LOC113717265	LOC113695945	LOC113740599	LOC113725021	LOC113734359	LOC113688530	LOC113727311	LOC113704290	LOC113690741	LOC113725323	LOC113736605	LOC113734969	LOC113738570	LOC113704033	LOC113694772	LOC113712945	LOC113742785	LOC113736605	LOC113698512
LOC113697487	LOC113733981	LOC113732796	LOC113727167	LOC113732412	LOC113712209	LOC113693525	LOC113728092	LOC113703842	LOC113702239	LOC113742663	LOC113738186	LOC113698988	LOC113731942	LOC113702202	LOC113726734	LOC113690778	LOC113720205	LOC113690778	LOC113696259	LOC113727810	LOC113702416	LOC113727791	LOC113697005	LOC113708958
LOC113714438	LOC113736605	LOC113691670	LOC113712904	LOC113717203	LOC113711396	LOC113714893	LOC113730554	LOC113738410	LOC113736849	LOC113732827	LOC113692718	LOC113742534	LOC113709088	LOC113726466	LOC113706854	LOC113725257	LOC113698064	LOC113705663	LOC113730230	LOC113710463	LOC113714852	LOC113704024	LOC113710616	LOC113702107
LOC113717587	LOC113696246	LOC113692871	LOC113713367	LOC113740263	LOC113742845	LOC113702927	LOC113693946	LOC113703031	LOC113716813	LOC113716741	LOC113694012	LOC113731220	LOC113695900	LOC113725748	LOC113733080	LOC113715659	LOC113730835	LOC113738131	LOC113706945	LOC113725239	LOC113697827	LOC113709088	LOC113705663	LOC113714648
LOC113697792	LOC113690778	LOC113730068	LOC113709281	LOC113725915	LOC113725911	LOC113695921	LOC113707172	LOC113742679	LOC113722968	LOC113733252	LOC113736792	LOC113708085	LOC113743530	LOC113705073	LOC113725794	LOC113696973	LOC113733300	LOC113699536	LOC113694010	LOC113694731	LOC113736605	LOC113731142	LOC113725574	LOC113690309
LOC113707156	LOC113742191	LOC113704371	LOC113708643	LOC113729973	LOC113719356	LOC113700103	LOC113709682	LOC113734973	LOC113698930	LOC113690947	LOC113727846	LOC113734817	LOC113687978	LOC113704374	LOC113710463	LOC113690018	LOC113696214	LOC113727877	LOC113736789	LOC113736493	LOC113696246	LOC113731855	LOC113707161	LOC113718136
LOC113740314	LOC113691652	LOC113739770	LOC113725297	LOC113699398	LOC113716013	LOC113705141	LOC113701022	LOC113703482	LOC113700446	LOC113714854	LOC113694778	LOC113739843	LOC113699983	LOC113719713	LOC113725239	LOC113725136	LOC113736733	LOC113730164	LOC113688611	LOC113718705	LOC113690778	LOC113702176	LOC113711959	LOC113738696
LOC113719126	LOC113699536	LOC113734304	LOC113731699	LOC113726510	LOC113743492	LOC113695179	LOC113697057	LOC113707977	LOC113717011	LOC113703949	LOC113714736	LOC113701197	LOC113719296	LOC113725623	LOC113731880	LOC113742295	LOC113730554	LOC113714469	LOC113710242	LOC113700990	LOC113691652	LOC113736758	LOC113693665	LOC113726458
LOC113699317	LOC113707161	LOC113712253	LOC113700127	LOC113709751	LOC113707693	LOC113688530	LOC113726113	LOC113695314	LOC113691473	LOC113704377	LOC113732958	LOC113713763	LOC113715564	LOC113724891	LOC113734943	LOC113698016	LOC113687998	LOC113725297	LOC113698326	LOC113732038	LOC113705663	LOC113690292	LOC113713367	LOC113708507
LOC113706831	LOC113714357	LOC113730977	LOC113736647	LOC113705647	LOC113709581	LOC113712275	LOC113742985	LOC113687862	LOC113729813	LOC113727808	LOC113739591	LOC113703454	LOC113714709	LOC113697748	LOC113718705	LOC113703597	LOC113688264	LOC113702024	LOC113711017	LOC113687974	LOC113725257	LOC113708694	LOC113729872	LOC113730046
LOC113740264	LOC113698016	LOC113704078	LOC113742559	LOC113725569	LOC113688803	LOC113732958	LOC113698922	LOC113712979	LOC113690741	LOC113725111	LOC113712711	LOC113706846	LOC113717160	LOC113719626	LOC113700990	LOC113688483	LOC113732920	LOC113734761	LOC113726965	LOC113725524	LOC113715659	LOC113724777	LOC113742332	LOC113731681
LOC113733005	LOC113726047	LOC113725021	LOC113734761	LOC113697761	LOC113688991	LOC113728115	LOC113715528	LOC113703133	LOC113698599	LOC113743691	LOC113730549	LOC113742913	LOC113734462	LOC113701222	LOC113692144	LOC113702939	LOC113707172	LOC113715709	LOC113728747	LOC113691675	LOC113732449	LOC113715125	LOC113712812	LOC113700046
LOC113713313	LOC113693923	LOC113726628	LOC113705652	LOC113725668	LOC113714660	LOC113726564	LOC113741888	LOC113693638	LOC113726466	LOC113733835	LOC113690346	LOC113732028	LOC113740200	LOC113712716	LOC113709569	LOC113736809	LOC113703170	LOC113688924	LOC113726692	LOC113706318	LOC113687915	LOC113722174	LOC113693923	LOC113710295
LOC113738056	LOC113716391	LOC113710590	LOC113731983	LOC113725194	LOC113728207	LOC113730549	LOC113690566	LOC113739592	LOC113725748	LOC113736652	LOC113722738	LOC113734934	LOC113708580	LOC113707217	LOC113703944	LOC113734761	LOC113688520	LOC113732150	LOC113694556	LOC113707212	LOC113704044	LOC113691955	LOC113700127	LOC113728083
LOC113716319	LOC113702939	LOC113732102	LOC113732951	LOC113713500	LOC113725507	LOC113702894	LOC113703640	LOC113707178	LOC113716801	LOC113732284	LOC113726620	LOC113703488	LOC113717666	LOC113727460	LOC113725524	LOC113731983	LOC113708862	LOC113699192	LOC113739500	LOC113715765	LOC113725136	LOC113731238	LOC113688924	LOC113743390
LOC113695746	LOC113710915	LOC113732569	LOC113725992	LOC113718979	LOC113711488	LOC113739554	LOC113715147	LOC113693814	LOC113712889	LOC113734441	LOC113695057	LOC113725938	LOC113696275	LOC113728230	LOC113698962	LOC113715733	LOC113712957	LOC113731197	LOC113702202	LOC113695615	LOC113742295	LOC113714709	LOC113707463	LOC113693621
LOC113724395	LOC113700127	LOC113730411	LOC113716883	LOC113731376	LOC113741704	LOC113732654	LOC113735340	LOC113741780	LOC113697229	LOC113688841	LOC113701781	LOC113718096	LOC113705141	LOC113698698	LOC113731789	LOC113689783	LOC113736267	LOC113716883	LOC113725748	LOC113704093	LOC113698016	LOC113722958	LOC113706864	LOC113694010
LOC113694838	LOC113690759	LOC113731718	LOC113714587	LOC113690340	LOC113713028	LOC113715479	LOC113735157	LOC113725944	LOC113701331	LOC113704039	LOC113742516	LOC113717243	LOC113730434	LOC113691496	LOC113698526	LOC113703722	LOC113695947	LOC113742147	LOC113716801	LOC113711842	LOC113726047	LOC113689858	LOC113699192	LOC113702374
LOC113730283	LOC113706934	LOC113692821	LOC113734340	LOC113726060	LOC113718686	LOC113725350	LOC113696031	LOC113699020	LOC113727460	LOC113711396	LOC113715479	LOC113723024	LOC113698554	LOC113702412	LOC113740457	LOC113734976	LOC113707484	LOC113696264	LOC113716377	LOC113694521	LOC113693923	LOC113740569	LOC113699001	LOC113702239
LOC113693780	LOC113734761	LOC113726542	LOC113729784	LOC113742810	LOC113714821	LOC113705530	LOC113702001	LOC113701859	LOC113697311	LOC113691732	LOC113705530	LOC113714650	LOC113733054	LOC113711768	LOC113712124	LOC113704016	LOC113708852	LOC113739558	LOC113731786	LOC113700495	LOC113710915	LOC113734766	LOC113700098	LOC113740052
LOC113730753	LOC113731983	LOC113710404	LOC113726954	LOC113707295	LOC113710402	LOC113716447	LOC113701691	LOC113690508	LOC113730630	LOC113720825	LOC113697464	LOC113727284	LOC113740349	LOC113732619	LOC113727165	LOC113718022	LOC113714448	LOC113731942	LOC113730214	LOC113739167	LOC113695972	LOC113717666	LOC113712757	LOC113705061
LOC113722889	LOC113732951	LOC113706991	LOC113710494	LOC113732219	LOC113719023	LOC113694640	LOC113726070	LOC113711662	LOC113700110	LOC113716013	LOC113716493	LOC113741300	LOC113736793	LOC113727040	LOC113739677	LOC113691716	LOC113695731	LOC113702015	LOC113725148	LOC113688135	LOC113707463	LOC113703902	LOC113712272	LOC113734243
LOC113724581	LOC113701910	LOC113701629	LOC113695900	LOC113735089	LOC113701815	LOC113697464	LOC113719422	LOC113741579	LOC113716812	LOC113691857	LOC113709259	LOC113734638	LOC113736213	LOC113708952	LOC113687855	LOC113736867	LOC113693952	LOC113695964	LOC113691985	LOC113730199	LOC113717019	LOC113712290	LOC113742114	LOC113691070
LOC113730924	LOC113692528	LOC113722523	LOC113691082	LOC113734295	LOC113726186	LOC113716493	LOC113732683	LOC113739694	LOC113734242	LOC113727235	LOC113734783	LOC113728129	LOC113731011	LOC113720643	LOC113708650	LOC113694228	LOC113700202	LOC113729784	LOC113697591	LOC113733925	LOC113732951	LOC113712562	LOC113731942	LOC113733950
LOC113733849	LOC113724328	LOC113731674	LOC113731007	LOC113738478	LOC113734805	LOC113701645	LOC113727825	LOC113716926	LOC113701776	LOC113710256	LOC113738163	LOC113727414	LOC113725934	LOC113732252	LOC113740590	LOC113728032	LOC113710435	LOC113688098	LOC113742604	LOC113716880	LOC113732085	LOC113727754	LOC113688098	LOC113703651
LOC113734045	LOC113690949	LOC113707424	LOC113740391	LOC113734819	LOC113716840	LOC113709259	LOC113723528	LOC113731090	LOC113707768	LOC113734088	LOC113699048	LOC113703723	LOC113699057	LOC113704236	LOC113695615	LOC113693525	LOC113726109	LOC113702176	LOC113727460	LOC113716839	LOC113689783	LOC113742221	LOC113702264	LOC113715584
LOC113725432	LOC113693525	LOC113712889	LOC113719296	LOC113708570	LOC113717092	LOC113701840	LOC113730622	LOC113694892	LOC113727349	LOC113702120	LOC113698197	LOC113707476	LOC113732958	LOC113714506	LOC113727917	LOC113732638	LOC113690634	LOC113697917	LOC113704132	LOC113730259	LOC113734976	LOC113736925	LOC113702176	LOC113706741
LOC113729729	LOC113700205	LOC113727924	LOC113715564	LOC113736785	LOC113696243	LOC113741571	LOC113734545	LOC113742800	LOC113728148	LOC113709581	LOC113727189	LOC113707935	LOC113710186	LOC113727136	LOC113704093	LOC113691562	LOC113733886	LOC113731007	LOC113704303	LOC113714498	LOC113707378	LOC113708700	LOC113726333	LOC113719645
LOC113702743	LOC113691562	LOC113739699	LOC113719660	LOC113743479	LOC113714565	LOC113725505	LOC113742696	LOC113727655	LOC113708952	LOC113693857	LOC113725704	LOC113737990	LOC113732547	LOC113725788	LOC113732251	LOC113695921	LOC113690566	LOC113718022	LOC113708619	LOC113730984	LOC113716401	LOC113725056	LOC113704016	LOC113694556
LOC113732192	LOC113714893	LOC113743038	LOC113736373	LOC113732444	LOC113735263	LOC113732093	LOC113733966	LOC113725440	LOC113716896	LOC113728207	LOC113736503	LOC113702149	LOC113728115	LOC113723001	LOC113697040	LOC113700103	LOC113701678	LOC113740391	LOC113734979	LOC113688255	LOC113702176	LOC113699246	LOC113731007	LOC113707363
LOC113734019	LOC113734462	LOC113714613	LOC113722958	LOC113728011	LOC113705678	LOC113719145	LOC113701914	LOC113731975	LOC113708024	LOC113738085	LOC113743770	LOC113689860	LOC113738081	LOC113697172	LOC113711842	LOC113733144	LOC113742062	LOC113704133	LOC113730041	LOC113730922	LOC113730668	LOC113720368	LOC113726580	LOC113719110
LOC113712999	LOC113688060	LOC113696321	LOC113701247	LOC113712184	LOC113733257	LOC113699048	LOC113725713	LOC113695652	LOC113715927	LOC113718696	LOC113706475	LOC113731685	LOC113742242	LOC113742730	LOC113739167	LOC113730700	LOC113714721	LOC113699983	LOC113743239	LOC113739541	LOC113718022	LOC113725967	LOC113714709	LOC113690741
LOC113726734	LOC113725442	LOC113743544	LOC113698713	LOC113742211	LOC113734666	LOC113713276	LOC113695145	LOC113739888	LOC113715681	LOC113697477	LOC113695947	LOC113701832	LOC113711610	LOC113714632	LOC113717683	LOC113713819	LOC113732551	LOC113715564	LOC113739822	LOC113731913	LOC113732887	LOC113720754	LOC113722958	LOC113707184
LOC113710284	LOC113736584	LOC113697923	LOC113738124	LOC113736544	LOC113716760	LOC113691728	LOC113742181	LOC113734804	LOC113723001	LOC113713028	LOC113740599	LOC113688273	LOC113725224	LOC113701470	LOC113688135	LOC113693133	LOC113693814	LOC113714709	LOC113727308	LOC113740386	LOC113691716	LOC113714525	LOC113701247	LOC113691499
LOC113697443	LOC113716397	LOC113728430	LOC113691559	LOC113734351	LOC113725732	LOC113698197	LOC113694526	LOC113726021	LOC113742730	LOC113731222	LOC113727266	LOC113710918	LOC113742516	LOC113693934	LOC113714805	LOC113724850	LOC113710909	LOC113705575	LOC113697091	LOC113698165	LOC113736867	LOC113708091	LOC113701750	LOC113702202
LOC113716855	LOC113691559	LOC113699355	LOC113725035	LOC113715775	LOC113724986	LOC113727189	LOC113696027	LOC113741630	LOC113736410	LOC113703109	LOC113704761	LOC113694253	LOC113687935	LOC113739894	LOC113703876	LOC113730599	LOC113694267	LOC113698713	LOC113712187	LOC113718013	LOC113728032	LOC113734965	LOC113738124	LOC113736352
LOC113709067	LOC113738529	LOC113728230	LOC113690849	LOC113689762	LOC113717038	LOC113734846	LOC113731445	LOC113732285	LOC113701470	LOC113703262	LOC113739990	LOC113697816	LOC113730780	LOC113693955	LOC113697510	LOC113736688	LOC113726950	LOC113740200	LOC113707166	LOC113709635	LOC113730982	LOC113700431	LOC113740200	LOC113726466
LOC113694772	LOC113730700	LOC113735264	LOC113712607	LOC113722574	LOC113729968	LOC113696993	LOC113725362	LOC113706781	LOC113696013	LOC113710402	LOC113739950	LOC113712571	LOC113705530	LOC113689016	LOC113714498	LOC113710561	LOC113730022	LOC113701284	LOC113730630	LOC113722999	LOC113688575	LOC113692696	LOC113708580	LOC113709587
LOC113726478	LOC113713819	LOC113710962	LOC113696815	LOC113702096	LOC113705522	LOC113706475	LOC113706408	LOC113695673	LOC113703042	LOC113712493	LOC113742679	LOC113698656	LOC113690392	LOC113732183	LOC113687712	LOC113698484	LOC113734183	LOC113703847	LOC113707768	LOC113733835	LOC113691562	LOC113734990	LOC113691559	LOC113693783
LOC113727810	LOC113695650	LOC113698698	LOC113718985	LOC113708829	LOC113731735	LOC113725880	LOC113734297	LOC113730524	LOC113732183	LOC113725813	LOC113707174	LOC113693739	LOC113690449	LOC113695862	LOC113728132	LOC113738186	LOC113742464	LOC113708849	LOC113727349	LOC113739540	LOC113714893	LOC113715025	LOC113713819	LOC113702223
LOC113738695	LOC113705141	LOC113688773	LOC113690348	LOC113714678	LOC113704662	LOC113740599	LOC113736978	LOC113694100	LOC113693718	LOC113694110	LOC113717577	LOC113721955	LOC113727865	LOC113731946	LOC113727086	LOC113690359	LOC113701884	LOC113724850	LOC113733111	LOC113705330	LOC113695921	LOC113730683	LOC113733833	LOC113716801
LOC113713024	LOC113695179	LOC113741718	LOC113730599	LOC113728016	LOC113690228	LOC113717404	LOC113728703	LOC113704060	LOC113731072	LOC113734805	LOC113698838	LOC113702793	LOC113724744	LOC113731968	LOC113742663	LOC113732958	LOC113727342	LOC113730434	LOC113730635	LOC113693853	LOC113691494	LOC113722422	LOC113713312	LOC113731909
LOC113719463	LOC113732566	LOC113689028	LOC113733054	LOC113706922	LOC113732448	LOC113742679	LOC113687960	LOC113699063	LOC113706810	LOC113713854	LOC113712764	LOC113734313	LOC113727767	LOC113691328	LOC113736973	LOC113712711	LOC113701774	LOC113731916	LOC113699304	LOC113710310	LOC113718691	LOC113738150	LOC113699244	LOC113712889
LOC113734943	LOC113730599	LOC113708100	LOC113734653	LOC113698512	LOC113690528	LOC113725577	LOC113740251	LOC113740402	LOC113727398	LOC113697310	LOC113731507	LOC113704232	LOC113701154	LOC113732841	LOC113732827	LOC113688099	LOC113698692	LOC113694805	LOC113743539	LOC113711979	LOC113731037	LOC113698064	LOC113712442	LOC113712264
LOC113712998	LOC113732778	LOC113719077	LOC113694951	LOC113736225	LOC113709857	LOC113726983	LOC113716964	LOC113704372	LOC113731946	LOC113703020	LOC113703183	LOC113707649	LOC113729836	LOC113717164	LOC113716741	LOC113734797	LOC113710427	LOC113688036	LOC113716896	LOC113710282	LOC113736584	LOC113712256	LOC113724192	LOC113697229
LOC113723092	LOC113704297	LOC113711849	LOC113731011	LOC113716982	LOC113729936	LOC113727502	LOC113692794	LOC113716339	LOC113691328	LOC113743626	LOC113699858	LOC113732951	LOC113739871	LOC113704154	LOC113733252	LOC113726564	LOC113734545	LOC113730405	LOC113727263	LOC113727003	LOC113716397	LOC113719680	LOC113730599	LOC113705067
LOC113688998	LOC113698951	LOC113712314	LOC113699197	LOC113702107	LOC113722453	LOC113691409	LOC113708053	LOC113727523	LOC113735097	LOC113702755	LOC113725458	LOC113732150	LOC113727684	LOC113711830	LOC113714986	LOC113740389	LOC113697369	LOC113731011	LOC113700455	LOC113692233	LOC113730700	LOC113740353	LOC113710561	LOC113731786
LOC113718705	LOC113737032	LOC113721947	LOC113725934	LOC113690276	LOC113728035	LOC113717577	LOC113734270	LOC113739745	LOC113732841	LOC113719056	LOC113709119	LOC113714836	LOC113743770	LOC113711284	LOC113688255	LOC113730549	LOC113699939	LOC113699057	LOC113703655	LOC113702869	LOC113713819	LOC113705534	LOC113733054	LOC113693993
LOC113701803	LOC113712275	LOC113693585	LOC113740109	LOC113693694	LOC113694131	LOC113698625	LOC113711939	LOC113692701	LOC113734698	LOC113693725	LOC113697878	LOC113729828	LOC113716824	LOC113732946	LOC113739541	LOC113702894	LOC113742181	LOC113726733	LOC113696195	LOC113735412	LOC113697574	LOC113695945	LOC113712827	LOC113697748
LOC113727325	LOC113732958	LOC113739669	LOC113726733	LOC113706921	LOC113715148	LOC113701678	LOC113732983	LOC113717067	LOC113712704	LOC113709482	LOC113733960	LOC113699006	LOC113718685	LOC113725205	LOC113703949	LOC113726620	LOC113693664	LOC113690760	LOC113730930	LOC113716013	LOC113732566	LOC113713262	LOC113691132	LOC113701331
LOC113709569	LOC113711909	LOC113715143	LOC113710186	LOC113690309	LOC113726642	LOC113690776	LOC113694620	LOC113693762	LOC113695412	LOC113734796	LOC113688582	LOC113736602	LOC113734214	LOC113707837	LOC113718013	LOC113711610	LOC113688021	LOC113713669	LOC113715927	LOC113691857	LOC113690348	LOC113712388	LOC113734839	LOC113691985
LOC113703944	LOC113690760	LOC113704175	LOC113701589	LOC113718911	LOC113717232	LOC113703133	LOC113701893	LOC113699402	LOC113707148	LOC113688139	LOC113731413	LOC113705251	LOC113738410	LOC113739872	LOC113726618	LOC113739554	LOC113698740	LOC113697098	LOC113741568	LOC113694548	LOC113726403	LOC113740156	LOC113736793	LOC113728094
LOC113725524	LOC113694141	LOC113719154	LOC113740323	LOC113718136	LOC113732210	LOC113717651	LOC113690517	LOC113699931	LOC113712673	LOC113735263	LOC113725562	LOC113697889	LOC113703031	LOC113688573	LOC113712416	LOC113732654	LOC113700009	LOC113738081	LOC113727136	LOC113743492	LOC113708867	LOC113729836	LOC113726403	LOC113719068
LOC113742179	LOC113712711	LOC113741190	LOC113740389	LOC113701246	LOC113726074	LOC113703377	LOC113725343	LOC113733843	LOC113732946	LOC113727996	LOC113697369	LOC113709088	LOC113739547	LOC113725288	LOC113713608	LOC113715479	LOC113712433	LOC113734965	LOC113696146	LOC113727235	LOC113725228	LOC113730554	LOC113725018	LOC113707217
LOC113734706	LOC113736320	LOC113727049	LOC113734965	LOC113713181	LOC113696997	LOC113728023	LOC113730796	LOC113690337	LOC113696967	LOC113726046	LOC113723540	LOC113731941	LOC113742679	LOC113711111	LOC113693853	LOC113712054	LOC113734301	LOC113711610	LOC113697172	LOC113715366	LOC113710222	LOC113742183	LOC113725923	LOC113693866
LOC113698526	LOC113726564	LOC113739966	LOC113710405	LOC113708507	LOC113688896	LOC113691365	LOC113730916	LOC113724592	LOC113712421	LOC113734666	LOC113694968	LOC113695900	LOC113734973	LOC113712385	LOC113725461	LOC113705530	LOC113707875	LOC113730780	LOC113739894	LOC113732567	LOC113736670	LOC113713276	LOC113725719	LOC113704132
LOC113691675	LOC113738081	LOC113701760	LOC113722738	LOC113730046	LOC113725122	LOC113699858	LOC113712805	NA	LOC113702954	LOC113709847	LOC113690875	LOC113719335	LOC113707977	LOC113717243	LOC113710282	LOC113697202	LOC113732302	LOC113705530	LOC113713018	LOC113698961	LOC113739591	LOC113727189	LOC113732958	LOC113704303
LOC113706318	LOC113706965	LOC113723001	LOC113716447	LOC113710374	LOC113724752	LOC113732446	LOC113727590	NA	LOC113711123	LOC113725732	LOC113727655	LOC113719178	LOC113717898	LOC113723024	LOC113699039	LOC113694640	LOC113742894	LOC113690392	LOC113693955	LOC113734088	LOC113736320	LOC113732920	LOC113713669	LOC113743239
LOC113712124	LOC113730549	LOC113696146	LOC113694769	LOC113714539	LOC113732377	LOC113708575	LOC113717963	NA	LOC113738614	LOC113695079	LOC113698366	LOC113740158	LOC113690331	LOC113735227	LOC113704039	LOC113697464	LOC113693788	LOC113690577	LOC113731072	LOC113688803	LOC113728115	LOC113701723	LOC113701589	LOC113739822
LOC113707212	LOC113723071	LOC113701470	LOC113701820	LOC113716484	LOC113719234	LOC113701598	LOC113706737	NA	LOC113712385	LOC113690297	LOC113714815	LOC113692833	LOC113698289	LOC113725850	LOC113691732	LOC113699413	LOC113727973	LOC113701820	LOC113699564	LOC113693857	LOC113738081	LOC113703170	LOC113697098	LOC113717810
LOC113740277	LOC113715693	LOC113731473	LOC113694640	LOC113706945	LOC113718345	LOC113742665	LOC113702898	NA	LOC113732001	LOC113705522	LOC113710183	LOC113699066	LOC113732172	LOC113717284	LOC113742845	LOC113743378	LOC113698890	LOC113734990	LOC113691328	LOC113728207	LOC113706965	LOC113742970	LOC113695085	LOC113707166
LOC113694083	LOC113710405	LOC113726115	LOC113690857	LOC113694010	LOC113724951	LOC113708835	LOC113738160	NA	LOC113704220	LOC113717326	LOC113702767	LOC113735202	LOC113717651	LOC113718277	LOC113687914	LOC113725549	LOC113734756	LOC113692882	LOC113735097	LOC113694211	LOC113736934	LOC113714346	LOC113701157	LOC113716395
LOC113719621	LOC113739554	LOC113697126	LOC113712265	LOC113702374	LOC113732689	LOC113725458	LOC113709652	NA	LOC113732122	LOC113730764	LOC113732285	LOC113710232	LOC113725251	LOC113691846	LOC113716013	LOC113726851	LOC113701067	LOC113716493	LOC113704154	LOC113706891	LOC113723071	LOC113708862	LOC113710405	LOC113734242
LOC113712303	LOC113732654	LOC113692803	LOC113699413	LOC113743463	LOC113702940	LOC113709119	LOC113719075	NA	LOC113717243	LOC113736924	LOC113692051	LOC113715564	LOC113712339	LOC113699257	LOC113731965	LOC113734005	LOC113708600	LOC113727865	LOC113712704	LOC113713590	LOC113710405	LOC113702228	LOC113696080	LOC113707768
LOC113714622	LOC113715479	LOC113726560	LOC113716493	LOC113717316	LOC113728164	LOC113739861	LOC113695078	NA	LOC113723024	LOC113732448	LOC113712288	LOC113742558	LOC113707178	LOC113702416	LOC113689032	LOC113711044	LOC113740306	LOC113739833	LOC113707152	LOC113716351	LOC113722738	LOC113736267	LOC113712346	LOC113743539
LOC113689018	LOC113705530	LOC113694554	LOC113739868	LOC113702239	LOC113687987	LOC113694892	LOC113707685	NA	LOC113718992	LOC113690528	LOC113702088	LOC113692399	LOC113718793	LOC113739756	LOC113731884	LOC113715637	LOC113701223	LOC113725217	LOC113707148	LOC113725648	LOC113702894	LOC113726113	LOC113705530	LOC113716896
LOC113695615	LOC113716447	LOC113695631	LOC113724744	LOC113740052	LOC113727918	LOC113699256	LOC113697121	NA	LOC113735227	LOC113732533	LOC113729895	LOC113729930	LOC113693814	LOC113729902	LOC113743492	LOC113725436	LOC113694620	LOC113738163	LOC113704325	LOC113725204	LOC113711610	LOC113712065	LOC113732877	LOC113708024
LOC113712512	LOC113734990	LOC113699425	LOC113701840	LOC113698176	LOC113715611	LOC113697369	LOC113734288	NA	LOC113724780	LOC113701858	LOC113700691	LOC113742689	LOC113701598	LOC113708520	LOC113703594	LOC113706747	LOC113734772	LOC113715637	LOC113725003	LOC113743736	LOC113701781	LOC113691282	LOC113734990	LOC113727263
LOC113717970	LOC113694640	LOC113732100	LOC113727767	LOC113722968	LOC113699573	LOC113740011	LOC113717148	NA	LOC113714529	LOC113729936	LOC113742894	LOC113689858	LOC113722296	LOC113712295	LOC113715366	LOC113699048	LOC113739708	LOC113729836	LOC113709480	LOC113741704	LOC113739554	LOC113695731	LOC113694640	LOC113692377
LOC113739167	LOC113716493	LOC113714402	LOC113701154	LOC113732102	LOC113725929	LOC113690875	LOC113710299	NA	LOC113719101	LOC113697265	LOC113727685	LOC113725296	LOC113719008	LOC113696246	LOC113734088	LOC113698197	LOC113734181	LOC113706747	LOC113696967	LOC113713028	LOC113715479	LOC113695453	LOC113699413	LOC113734917
LOC113715522	LOC113701645	LOC113738026	LOC113727102	LOC113700446	LOC113730873	LOC113701665	NA	NA	LOC113718277	LOC113724881	LOC113705873	LOC113734766	LOC113713382	LOC113737990	LOC113709581	LOC113729865	LOC113713025	LOC113739871	LOC113710294	LOC113718686	LOC113712054	LOC113741555	LOC113701645	LOC113695663
LOC113703284	LOC113704376	LOC113691125	LOC113729847	LOC113688611	LOC113733359	LOC113719040	NA	NA	LOC113701899	LOC113692003	LOC113730598	LOC113732981	LOC113727901	LOC113706108	LOC113693857	LOC113739761	LOC113716779	LOC113703090	LOC113704054	LOC113738189	LOC113705530	LOC113690565	LOC113702712	LOC113737993
LOC113688135	LOC113701840	LOC113688312	LOC113703036	LOC113698525	LOC113704917	LOC113727655	NA	NA	LOC113730570	LOC113700121	LOC113711898	LOC113698098	LOC113710909	LOC113725136	LOC113700389	LOC113708617	LOC113730796	LOC113699298	LOC113731243	LOC113691835	LOC113716447	LOC113736706	LOC113701286	LOC113700455
LOC113730199	LOC113734005	LOC113739843	LOC113706747	LOC113733950	LOC113707366	LOC113725506	NA	NA	LOC113731611	LOC113703398	LOC113696119	LOC113703402	LOC113701859	LOC113710364	LOC113706341	LOC113743713	LOC113741234	LOC113740057	LOC113718838	LOC113732893	LOC113742580	LOC113703482	LOC113691129	LOC113690584
LOC113714805	LOC113715094	LOC113701197	LOC113739871	LOC113717011	LOC113735246	LOC113714815	NA	NA	LOC113729902	LOC113728035	LOC113702690	LOC113695844	LOC113690508	LOC113736779	LOC113714660	LOC113719209	LOC113712805	LOC113692753	LOC113707837	LOC113719023	LOC113734990	LOC113693834	LOC113740178	LOC113695944
LOC113718029	LOC113730925	LOC113706916	LOC113699048	LOC113699356	LOC113734499	LOC113710183	NA	NA	LOC113732323	LOC113715148	LOC113698871	LOC113736925	LOC113717677	LOC113724980	LOC113728466	LOC113740599	LOC113719679	LOC113697057	LOC113739872	LOC113725813	LOC113694640	LOC113729863	LOC113701154	LOC113732252
LOC113703876	LOC113719145	LOC113735152	LOC113701745	LOC113729813	LOC113712327	LOC113702767	NA	NA	LOC113736248	LOC113726642	LOC113698178	LOC113741354	LOC113698663	LOC113716717	LOC113713590	LOC113727266	LOC113738008	LOC113717945	LOC113688573	LOC113694110	LOC113697464	LOC113726452	LOC113714767	LOC113710578
LOC113697510	LOC113706747	LOC113739872	LOC113691728	LOC113702202	LOC113716407	LOC113699954	NA	NA	LOC113712295	LOC113708948	LOC113743455	LOC113716452	LOC113716347	LOC113706974	LOC113711488	LOC113704761	LOC113697368	LOC113716824	LOC113742799	LOC113733924	LOC113716493	LOC113697843	LOC113725505	LOC113742979
LOC113689790	LOC113699048	LOC113742799	LOC113727189	LOC113688106	LOC113696998	LOC113710158	NA	NA	LOC113736243	LOC113736745	LOC113710194	LOC113733195	LOC113731090	LOC113726010	LOC113725648	LOC113717404	LOC113722638	LOC113740599	LOC113703904	LOC113707141	LOC113698064	LOC113701678	LOC113742452	LOC113717605
LOC113687712	LOC113713276	LOC113734934	LOC113704388	LOC113701872	LOC113702355	LOC113732630	NA	NA	LOC113696246	LOC113712811	LOC113738008	LOC113712146	LOC113715222	LOC113712812	LOC113692692	LOC113739990	LOC113698115	LOC113738410	LOC113718634	LOC113716840	LOC113734005	LOC113709299	LOC113738163	LOC113714506
LOC113730984	LOC113725315	LOC113703488	LOC113742542	LOC113706980	LOC113718964	LOC113713190	NA	NA	LOC113725574	LOC113717232	LOC113713805	LOC113712068	LOC113698692	LOC113688188	LOC113742690	LOC113742679	LOC113715708	LOC113695731	LOC113712487	LOC113717092	LOC113741571	LOC113716979	LOC113742223	LOC113730930
LOC113731959	LOC113691728	LOC113690689	LOC113740057	LOC113712889	LOC113697973	LOC113736279	NA	NA	LOC113725257	LOC113699032	LOC113701478	LOC113708937	LOC113697369	LOC113734313	LOC113713028	LOC113725577	LOC113734696	LOC113693661	LOC113688536	LOC113696243	LOC113701154	LOC113732551	LOC113698197	LOC113741568
LOC113700165	LOC113698197	LOC113739577	LOC113727175	LOC113727924	LOC113693743	LOC113712771	NA	NA	LOC113715659	LOC113742901	LOC113742270	LOC113703792	LOC113726021	LOC113727280	LOC113725581	LOC113738593	LOC113690337	LOC113693952	LOC113712385	LOC113743626	LOC113740156	LOC113693814	LOC113700200	LOC113696146
LOC113717031	LOC113714723	LOC113712659	LOC113692753	LOC113724891	LOC113742262	LOC113717686	NA	NA	LOC113701832	LOC113697936	LOC113707810	LOC113692498	LOC113697552	LOC113688924	LOC113731222	LOC113691409	NA	LOC113738593	LOC113706587	LOC113730921	LOC113706747	LOC113727371	LOC113740057	LOC113739937
LOC113735237	LOC113725704	LOC113728116	LOC113743807	LOC113691437	LOC113691658	LOC113697209	NA	NA	LOC113742990	LOC113732496	LOC113734051	LOC113690764	LOC113732285	LOC113715757	LOC113738189	LOC113717577	NA	LOC113742358	LOC113722941	LOC113709482	LOC113699048	LOC113715147	LOC113743807	LOC113690503
LOC113688255	LOC113731292	LOC113725938	LOC113702228	LOC113697591	LOC113701382	LOC113732285	NA	NA	LOC113706108	LOC113725122	LOC113697121	LOC113693919	LOC113692051	LOC113707463	LOC113707160	LOC113725626	NA	LOC113732503	LOC113717243	LOC113702491	LOC113688264	LOC113719008	LOC113702128	LOC113715096
LOC113739541	LOC113697793	LOC113718096	LOC113729887	LOC113704132	LOC113716892	LOC113697085	NA	NA	LOC113710364	LOC113732377	NA	LOC113734965	LOC113697085	LOC113731983	LOC113697899	LOC113712764	NA	LOC113690331	LOC113697297	LOC113735263	LOC113724925	LOC113719217	LOC113702228	LOC113713534
LOC113740186	LOC113729865	LOC113699095	LOC113734214	LOC113708619	LOC113725223	LOC113691831	NA	NA	LOC113736779	LOC113743700	NA	LOC113703542	LOC113707875	LOC113734250	LOC113714821	LOC113690776	NA	LOC113732549	LOC113722486	LOC113712463	LOC113727175	LOC113739546	LOC113695947	LOC113689016
LOC113698165	LOC113706960	LOC113731291	LOC113703842	LOC113728230	LOC113690349	LOC113697789	NA	NA	LOC113711959	LOC113718345	NA	LOC113700431	LOC113695673	LOC113692851	LOC113732893	LOC113692318	NA	LOC113738021	LOC113726550	LOC113712854	LOC113739761	LOC113694267	LOC113740599	LOC113695862
LOC113704377	LOC113695947	LOC113742386	LOC113704406	LOC113697091	LOC113690004	LOC113729895	NA	NA	LOC113736412	LOC113732689	NA	LOC113692696	LOC113707651	LOC113690407	LOC113703109	LOC113703377	NA	LOC113738231	LOC113739756	LOC113726046	LOC113732662	LOC113726950	LOC113738410	LOC113706810
LOC113698393	LOC113692594	LOC113730511	LOC113730406	LOC113743676	LOC113700064	LOC113727685	NA	NA	LOC113724980	LOC113697493	NA	LOC113725350	LOC113694023	LOC113692173	LOC113719023	LOC113703183	NA	LOC113717651	LOC113717919	LOC113714850	LOC113706960	LOC113702001	LOC113695731	LOC113706714
LOC113706165	LOC113725880	LOC113701899	LOC113697499	LOC113700110	LOC113689618	LOC113705873	NA	NA	LOC113716981	LOC113732666	NA	LOC113696096	LOC113695282	LOC113704290	LOC113712493	LOC113705632	NA	LOC113739592	LOC113731611	LOC113699276	LOC113695947	LOC113741533	LOC113693952	LOC113727398
LOC113688510	LOC113719209	LOC113690418	LOC113731469	LOC113716812	LOC113710940	LOC113725580	NA	NA	LOC113742128	LOC113730138	NA	LOC113694769	LOC113694100	LOC113713536	LOC113726186	LOC113693814	NA	LOC113691672	LOC113714548	LOC113691642	LOC113740599	LOC113712767	LOC113703482	LOC113699564
LOC113709635	LOC113717216	LOC113731316	LOC113742679	LOC113724766	LOC113711883	LOC113730598	NA	NA	LOC113706944	LOC113715611	NA	LOC113720205	LOC113739696	LOC113743531	LOC113707141	LOC113711670	NA	LOC113690537	LOC113714602	LOC113713807	LOC113717404	LOC113739861	LOC113732212	LOC113731968
LOC113732082	LOC113740599	LOC113733981	LOC113707977	LOC113725622	LOC113714684	LOC113702690	NA	NA	LOC113712282	LOC113706814	NA	LOC113730835	LOC113699063	LOC113695964	LOC113734805	LOC113706988	NA	LOC113739930	LOC113708520	LOC113724986	LOC113706930	LOC113712166	LOC113742358	LOC113732371
LOC113733835	LOC113717404	LOC113736605	LOC113742358	LOC113695889	LOC113724753	LOC113719162	NA	NA	LOC113688218	LOC113731903	NA	LOC113712558	LOC113691370	LOC113708517	LOC113696243	LOC113694340	NA	LOC113693814	LOC113736248	LOC113717038	LOC113732420	LOC113733966	LOC113696838	LOC113732841
LOC113736652	LOC113709430	LOC113698066	LOC113696838	LOC113742731	LOC113692667	LOC113688052	NA	NA	LOC113710477	LOC113700415	NA	LOC113714797	LOC113699472	LOC113742608	LOC113696042	LOC113712890	NA	LOC113697986	LOC113731420	LOC113717326	LOC113726983	LOC113697369	LOC113712979	LOC113734698
LOC113742626	LOC113742679	LOC113703964	LOC113687862	LOC113734242	LOC113713685	LOC113712805	NA	NA	LOC113694000	LOC113725929	NA	LOC113727725	LOC113716339	LOC113704112	LOC113694497	LOC113715220	NA	LOC113701598	LOC113736243	LOC113704662	LOC113697298	LOC113742269	LOC113725139	LOC113704154
LOC113712416	LOC113738593	LOC113737866	LOC113712979	LOC113727349	LOC113698006	LOC113734635	NA	NA	LOC113701421	LOC113730873	NA	LOC113719357	LOC113702157	LOC113711841	LOC113704069	LOC113697878	NA	LOC113719008	LOC113690778	LOC113690528	LOC113696838	LOC113701914	LOC113738231	LOC113707152
LOC113688838	LOC113697298	LOC113693608	LOC113725139	LOC113716794	LOC113731373	LOC113726768	NA	NA	LOC113708657	LOC113734826	NA	LOC113731383	LOC113712931	LOC113706314	LOC113734796	LOC113733960	NA	LOC113711670	LOC113716398	LOC113726840	LOC113698625	LOC113695145	LOC113739592	LOC113707148
LOC113732284	LOC113691409	LOC113737990	LOC113732172	LOC113743539	LOC113692166	LOC113738160	NA	NA	LOC113726092	LOC113709670	NA	LOC113695945	LOC113692701	LOC113740158	LOC113712854	LOC113739861	NA	LOC113727901	LOC113690072	LOC113729936	LOC113725626	LOC113707764	LOC113727702	LOC113696967
LOC113727113	LOC113696838	LOC113730088	LOC113738231	LOC113740431	LOC113726155	LOC113701692	NA	NA	LOC113730435	LOC113733359	NA	LOC113713262	LOC113717067	LOC113704016	LOC113727996	LOC113729970	NA	LOC113719217	LOC113705663	LOC113715106	LOC113712764	LOC113742181	LOC113691672	LOC113704054
LOC113726636	LOC113698625	LOC113688273	LOC113739592	LOC113708024	LOC113708668	LOC113742270	NA	NA	LOC113736809	LOC113704917	NA	LOC113689856	LOC113733118	LOC113715125	LOC113731676	LOC113700141	NA	LOC113730022	LOC113725574	LOC113741369	LOC113703377	LOC113693664	LOC113702297	LOC113692444
LOC113725461	LOC113698838	LOC113694253	LOC113739930	LOC113695663	LOC113737103	LOC113719075	NA	NA	LOC113702793	LOC113708939	NA	LOC113740156	LOC113700380	LOC113688177	LOC113694842	LOC113699179	NA	LOC113701859	LOC113715659	LOC113705377	LOC113710983	LOC113714824	LOC113742610	LOC113725205
LOC113710310	LOC113701678	LOC113699144	LOC113693814	LOC113700455	LOC113742328	LOC113734051	NA	NA	LOC113701847	LOC113736217	NA	LOC113727484	LOC113710936	LOC113688216	LOC113726046	LOC113694892	NA	LOC113741755	LOC113730051	LOC113692003	LOC113692598	LOC113688021	LOC113730458	LOC113718838
LOC113719295	LOC113703377	LOC113695880	LOC113701598	LOC113711033	LOC113702653	LOC113698689	NA	NA	LOC113715465	LOC113716407	NA	LOC113742183	LOC113734051	LOC113733934	LOC113726974	LOC113703187	NA	LOC113698663	LOC113742990	LOC113722453	LOC113726685	LOC113722789	LOC113690537	LOC113707837
LOC113712209	LOC113731507	LOC113693741	LOC113725944	LOC113695944	LOC113698293	LOC113697121	NA	NA	LOC113739571	LOC113739925	NA	LOC113732542	LOC113742994	LOC113699983	LOC113715550	LOC113734944	NA	LOC113697878	LOC113706108	LOC113717232	LOC113717857	LOC113696027	LOC113710123	LOC113719704
LOC113704039	LOC113699858	LOC113712174	LOC113711670	LOC113703655	LOC113732400	LOC113690337	NA	NA	LOC113731983	LOC113690864	NA	LOC113693946	LOC113716732	LOC113694280	LOC113725732	LOC113694968	NA	LOC113715196	LOC113707161	LOC113743318	LOC113691672	LOC113731445	LOC113693814	LOC113690689
LOC113711396	LOC113693814	LOC113693995	LOC113699043	LOC113728142	LOC113728054	LOC113707759	NA	NA	LOC113716883	LOC113702355	NA	LOC113701022	LOC113733843	LOC113711467	LOC113731642	LOC113690875	NA	LOC113716347	LOC113710364	LOC113724903	LOC113691365	LOC113696193	LOC113738182	LOC113738058
LOC113742845	LOC113732446	LOC113693739	LOC113710909	LOC113717608	LOC113724910	NA	NA	NA	LOC113690407	LOC113742920	NA	LOC113726113	LOC113732369	LOC113703513	LOC113695079	LOC113742800	NA	LOC113733331	LOC113742295	LOC113690275	LOC113719226	LOC113698598	LOC113722296	LOC113712487
LOC113706506	LOC113714574	LOC113688511	LOC113699020	LOC113715927	LOC113726063	NA	NA	NA	LOC113734976	LOC113701382	NA	LOC113687991	LOC113707759	LOC113690742	LOC113691642	LOC113730809	NA	LOC113692763	LOC113690501	LOC113690088	LOC113698894	LOC113711911	LOC113725944	LOC113742065
LOC113693714	LOC113708575	LOC113742332	LOC113730022	LOC113718389	LOC113733292	NA	NA	NA	LOC113713536	LOC113743749	NA	LOC113714910	LOC113717276	LOC113736872	LOC113742629	LOC113714815	NA	LOC113715222	LOC113712907	LOC113696997	LOC113694340	LOC113707875	LOC113694294	LOC113727789
LOC113736245	LOC113742665	LOC113716478	LOC113701859	LOC113717966	LOC113698738	NA	NA	NA	LOC113702015	LOC113719579	NA	LOC113708852	NA	LOC113726580	LOC113691095	LOC113695019	NA	LOC113730622	LOC113694000	LOC113688896	LOC113719422	LOC113742329	LOC113699993	LOC113708579
LOC113736398	LOC113711670	LOC113710236	LOC113695110	LOC113741568	LOC113723058	NA	NA	NA	LOC113743215	LOC113717355	NA	LOC113695731	NA	LOC113739908	LOC113690297	LOC113691130	NA	LOC113688582	LOC113726010	LOC113699785	LOC113714416	LOC113707414	LOC113710909	LOC113711111
LOC113716013	LOC113719226	LOC113731994	LOC113730015	LOC113715681	LOC113702381	NA	NA	NA	LOC113688550	LOC113708062	NA	LOC113738679	NA	LOC113692447	LOC113698654	LOC113710158	NA	LOC113695108	LOC113708643	LOC113712992	LOC113712890	LOC113735212	LOC113699020	LOC113714671
LOC113691857	LOC113713382	LOC113719177	LOC113694337	LOC113726128	LOC113698540	NA	NA	NA	LOC113725282	LOC113729929	NA	LOC113742985	NA	LOC113690970	LOC113726457	LOC113717686	NA	LOC113702244	LOC113712812	LOC113732689	LOC113736383	LOC113698986	LOC113701859	LOC113722941
LOC113739832	LOC113708835	LOC113705796	LOC113727880	LOC113696013	LOC113706662	NA	NA	NA	LOC113711841	LOC113703947	NA	LOC113698922	NA	LOC113710896	LOC113699059	LOC113700009	NA	LOC113732416	LOC113702024	LOC113709671	LOC113739861	LOC113701831	LOC113732713	LOC113735227
LOC113714577	LOC113701859	LOC113714934	LOC113695108	LOC113717328	LOC113731202	NA	NA	NA	LOC113740094	LOC113703460	NA	LOC113689887	NA	LOC113695921	LOC113697611	LOC113732285	NA	LOC113742696	LOC113688188	LOC113702940	LOC113727880	LOC113716964	LOC113691446	LOC113726550
LOC113734022	LOC113710274	LOC113706776	LOC113725562	LOC113703042	LOC113732687	NA	NA	NA	LOC113691543	LOC113700064	NA	LOC113694938	NA	LOC113734462	LOC113690228	LOC113692051	NA	LOC113734944	LOC113734761	LOC113717335	LOC113688582	LOC113708053	LOC113717701	LOC113731360
LOC113743492	LOC113706941	LOC113743018	LOC113698692	LOC113713534	LOC113730163	NA	NA	NA	LOC113706314	LOC113726997	NA	LOC113741415	NA	LOC113696088	LOC113690528	LOC113712288	NA	LOC113714941	LOC113702793	LOC113714462	LOC113695108	LOC113742632	LOC113715196	LOC113714852
LOC113697806	LOC113710903	LOC113712269	LOC113735226	LOC113732765	LOC113697821	NA	NA	NA	LOC113725240	LOC113740371	NA	LOC113729863	NA	LOC113705141	LOC113715106	LOC113707875	NA	LOC113699939	LOC113727280	LOC113687987	LOC113731413	LOC113691753	LOC113733331	LOC113740066
LOC113698961	LOC113712890	LOC113692629	LOC113734015	LOC113704192	LOC113698869	NA	NA	NA	LOC113740158	LOC113697061	NA	LOC113708074	NA	LOC113694536	LOC113705377	LOC113700691	NA	LOC113701047	LOC113741312	LOC113706814	LOC113739567	LOC113703607	LOC113734865	LOC113698767
LOC113734088	LOC113688582	LOC113710316	LOC113701047	LOC113689016	LOC113702889	NA	NA	NA	LOC113704016	LOC113715732	NA	LOC113725570	NA	LOC113718034	LOC113724881	LOC113703091	NA	LOC113742800	LOC113692575	LOC113691951	LOC113699256	LOC113726690	LOC113699256	LOC113733274
LOC113702120	LOC113695108	LOC113697577	LOC113727655	LOC113693718	LOC113726648	NA	NA	NA	LOC113730668	LOC113713685	NA	LOC113699216	NA	LOC113702775	LOC113692003	LOC113727685	NA	LOC113730809	LOC113714451	LOC113700550	LOC113703187	LOC113732983	LOC113704134	LOC113695681
LOC113732851	LOC113700141	LOC113705251	LOC113708839	LOC113695862	LOC113734111	NA	NA	NA	LOC113719485	LOC113698006	NA	LOC113739635	NA	LOC113715597	LOC113738128	LOC113701067	NA	LOC113727655	LOC113702007	LOC113730873	LOC113704134	LOC113695030	LOC113742696	LOC113708520
LOC113710459	LOC113696975	LOC113696185	LOC113730588	LOC113688204	LOC113707153	NA	NA	NA	LOC113710339	LOC113731373	NA	LOC113732551	NA	LOC113736688	LOC113689920	LOC113743690	NA	LOC113699954	LOC113734250	LOC113690895	LOC113697369	LOC113734772	LOC113697369	LOC113694487
LOC113714660	LOC113703187	LOC113695964	LOC113725440	LOC113727398	LOC113741344	NA	NA	NA	LOC113695836	LOC113692166	NA	LOC113693814	NA	LOC113717221	LOC113700121	LOC113725706	NA	LOC113705619	LOC113732150	LOC113733359	LOC113734944	LOC113716779	LOC113717269	LOC113703511
LOC113694211	LOC113734944	LOC113707240	LOC113731975	LOC113705502	LOC113693737	NA	NA	NA	LOC113715125	LOC113719271	NA	LOC113714861	NA	LOC113710511	LOC113703398	LOC113702690	NA	LOC113739888	LOC113733369	LOC113704917	LOC113711027	LOC113712790	LOC113733819	LOC113736605
LOC113713590	LOC113740011	LOC113731142	LOC113714824	LOC113691328	LOC113688243	NA	NA	NA	LOC113722174	LOC113737103	NA	LOC113728088	NA	LOC113725923	LOC113725016	LOC113698871	NA	LOC113717241	LOC113725212	LOC113694130	LOC113696110	LOC113730916	LOC113705580	LOC113712322
LOC113725648	LOC113711027	LOC113692833	LOC113702767	LOC113735097	LOC113719183	NA	NA	NA	LOC113688177	LOC113742328	NA	LOC113703310	NA	LOC113699057	LOC113694131	LOC113718965	NA	LOC113696193	LOC113707312	LOC113735246	LOC113701665	LOC113712805	LOC113714941	LOC113716398
LOC113743736	LOC113701665	LOC113735202	LOC113699912	LOC113717164	LOC113703106	NA	NA	NA	LOC113704133	LOC113702653	NA	LOC113739546	NA	LOC113712068	LOC113725355	LOC113743455	NA	LOC113697552	LOC113734976	LOC113724984	LOC113699939	LOC113734193	LOC113699939	LOC113710616
LOC113741704	LOC113699939	LOC113708694	LOC113726280	LOC113734698	LOC113702213	NA	NA	NA	LOC113729952	LOC113732400	NA	LOC113725155	NA	LOC113712275	LOC113726642	LOC113726706	NA	LOC113691649	LOC113731581	LOC113719654	LOC113742800	LOC113706737	LOC113701047	LOC113690072
LOC113736751	LOC113719040	LOC113732054	LOC113732285	LOC113712704	LOC113730692	NA	NA	NA	LOC113724872	LOC113732903	NA	LOC113690367	NA	LOC113702140	LOC113731972	LOC113712805	NA	LOC113710436	LOC113702015	LOC113718964	LOC113730809	LOC113738008	LOC113742800	LOC113691008
LOC113713028	LOC113730809	LOC113732887	LOC113688068	LOC113711284	LOC113735035	NA	NA	NA	LOC113727487	LOC113724910	NA	LOC113702001	NA	LOC113732958	LOC113708948	LOC113692701	NA	LOC113704137	LOC113730853	LOC113707267	LOC113710183	LOC113697368	LOC113730809	LOC113715659
LOC113731222	LOC113694245	LOC113699983	LOC113733667	LOC113707148	LOC113722974	NA	NA	NA	LOC113719660	LOC113700339	NA	LOC113708510	NA	LOC113710490	LOC113717162	LOC113738008	NA	LOC113707875	LOC113714942	LOC113742920	LOC113713190	LOC113701881	LOC113712721	LOC113701832
LOC113707160	LOC113714815	LOC113694280	LOC113704959	LOC113725003	LOC113726864	NA	NA	NA	LOC113711785	LOC113740284	NA	LOC113732683	NA	LOC113690278	LOC113717640	LOC113713805	NA	LOC113690413	LOC113740158	LOC113727135	LOC113717686	LOC113703378	LOC113742969	LOC113727384
LOC113696089	LOC113702767	LOC113709486	LOC113700691	LOC113697756	LOC113733465	NA	NA	NA	LOC113692447	LOC113695194	NA	LOC113712393	NA	LOC113716967	LOC113712811	LOC113735000	NA	LOC113707651	LOC113710339	LOC113701382	LOC113691649	LOC113722549	LOC113731969	LOC113706108
LOC113734558	LOC113699954	LOC113716410	LOC113739784	LOC113696967	LOC113714911	NA	NA	NA	LOC113722958	LOC113731657	NA	LOC113727825	NA	LOC113701157	LOC113694804	LOC113726768	NA	LOC113709250	LOC113715125	LOC113690772	LOC113697209	LOC113695078	LOC113717686	LOC113710364
LOC113732893	LOC113695019	LOC113742558	LOC113692758	LOC113712421	LOC113702205	NA	NA	NA	LOC113718149	LOC113708812	NA	LOC113723528	NA	LOC113722738	LOC113724903	LOC113703566	NA	LOC113730524	LOC113723990	LOC113738138	LOC113732285	LOC113719088	LOC113697085	LOC113711959
LOC113711504	LOC113740574	LOC113736373	LOC113730524	LOC113711640	LOC113708737	NA	NA	NA	LOC113695921	LOC113702381	NA	LOC113710427	NA	LOC113742242	LOC113699032	LOC113701041	NA	LOC113699063	LOC113709453	LOC113719579	LOC113712288	NA	LOC113704137	LOC113706944
LOC113703262	LOC113713190	LOC113702465	LOC113730806	LOC113702954	LOC113712801	NA	NA	NA	LOC113702465	LOC113732290	NA	LOC113713197	NA	LOC113711610	LOC113742901	LOC113707810	NA	LOC113698986	LOC113704133	LOC113717355	LOC113697085	NA	LOC113715409	LOC113725812
LOC113722986	LOC113698240	LOC113701247	LOC113732379	LOC113703904	LOC113714741	NA	NA	NA	LOC113688060	LOC113717654	NA	LOC113712166	NA	LOC113742516	LOC113690088	LOC113727169	NA	LOC113734756	LOC113734994	LOC113711964	LOC113698657	NA	LOC113704959	LOC113688218
LOC113712493	LOC113696193	LOC113698098	LOC113740402	LOC113690689	LOC113707615	NA	NA	NA	LOC113738124	LOC113717349	NA	LOC113696184	NA	LOC113732654	LOC113697936	NA	NA	LOC113739415	LOC113703513	LOC113725223	LOC113700691	NA	LOC113703687	LOC113710477
LOC113725813	LOC113700009	LOC113719279	LOC113739415	LOC113742065	LOC113691567	NA	NA	NA	LOC113728120	LOC113731202	NA	LOC113733966	NA	LOC113715479	LOC113726074	NA	NA	LOC113724919	LOC113722998	LOC113729929	LOC113688555	NA	LOC113700691	LOC113732714
LOC113733924	LOC113697209	LOC113703402	LOC113704372	LOC113738614	LOC113709234	NA	NA	NA	LOC113707389	LOC113732687	NA	LOC113697369	NA	LOC113725350	LOC113731295	NA	NA	LOC113742597	LOC113714571	LOC113703947	LOC113725580	NA	LOC113728112	LOC113694000
LOC113725049	LOC113732285	LOC113725703	LOC113702326	LOC113716740	LOC113732412	NA	NA	NA	LOC113696088	LOC113730163	NA	LOC113741706	NA	LOC113702876	LOC113712992	NA	NA	LOC113698871	LOC113719660	LOC113692588	LOC113730598	NA	LOC113725580	LOC113732438
LOC113730197	LOC113712288	LOC113727754	LOC113716339	LOC113704220	LOC113733059	NA	NA	NA	LOC113726275	LOC113693460	NA	LOC113690875	NA	LOC113705530	LOC113718345	NA	NA	LOC113708931	LOC113730980	LOC113710525	LOC113696108	NA	LOC113708605	LOC113712192
LOC113716840	LOC113702088	LOC113708700	LOC113708605	LOC113714671	LOC113693759	NA	NA	NA	LOC113715532	LOC113702889	NA	LOC113711651	NA	LOC113697464	LOC113697493	NA	NA	LOC113712931	LOC113726159	LOC113715686	LOC113716964	NA	LOC113708931	LOC113694027
LOC113697310	LOC113697085	LOC113725056	LOC113727523	LOC113717243	LOC113702777	NA	NA	NA	LOC113728033	LOC113702713	NA	LOC113724962	NA	LOC113716493	LOC113694650	NA	NA	LOC113733180	LOC113691562	LOC113698984	LOC113698225	NA	LOC113718965	LOC113708643
LOC113703020	LOC113691831	LOC113712390	LOC113727506	LOC113735227	LOC113727001	NA	NA	NA	LOC113728084	LOC113734111	NA	LOC113742627	NA	LOC113701645	LOC113735044	NA	NA	LOC113717555	LOC113695921	LOC113716703	LOC113702690	NA	LOC113712931	LOC113734522
LOC113719056	LOC113697789	LOC113725771	LOC113734413	LOC113724780	LOC113742551	NA	NA	NA	LOC113722711	LOC113725113	NA	LOC113734773	NA	LOC113710221	LOC113702940	NA	NA	LOC113695881	LOC113734462	LOC113713232	LOC113719162	NA	LOC113688052	LOC113699367
LOC113709482	LOC113706336	LOC113741354	LOC113699708	LOC113725850	LOC113688027	NA	NA	NA	LOC113694536	LOC113741344	NA	LOC113693664	NA	LOC113727865	LOC113728164	NA	NA	LOC113714992	LOC113701070	LOC113710157	LOC113725045	NA	LOC113733180	LOC113712812
LOC113707261	LOC113729895	LOC113717084	LOC113734237	LOC113719101	LOC113693781	NA	NA	NA	LOC113690348	LOC113697071	NA	LOC113714824	NA	LOC113724744	LOC113730138	NA	NA	LOC113711001	LOC113736711	LOC113733026	LOC113712507	NA	LOC113694032	LOC113742089
LOC113719206	LOC113700691	LOC113703624	LOC113741234	LOC113714798	LOC113731658	NA	NA	NA	LOC113733272	LOC113707766	NA	LOC113698740	NA	LOC113719259	LOC113687987	NA	NA	LOC113706554	LOC113691494	LOC113713685	LOC113710194	NA	LOC113712507	LOC113710959
LOC113712463	LOC113730524	LOC113742206	LOC113692701	LOC113699257	LOC113727471	NA	NA	NA	LOC113707767	LOC113704992	NA	LOC113700009	NA	LOC113698064	LOC113706814	NA	NA	LOC113726768	LOC113696088	LOC113691027	LOC113719179	NA	LOC113742544	LOC113700127
LOC113727996	LOC113742894	LOC113742566	LOC113703735	LOC113702416	LOC113710279	NA	NA	NA	LOC113715484	LOC113731720	NA	LOC113735349	NA	LOC113702079	LOC113727039	NA	NA	LOC113714526	LOC113716397	LOC113692166	LOC113712805	NA	LOC113739745	LOC113729891
LOC113705678	LOC113735051	LOC113703578	LOC113697368	LOC113730570	LOC113690878	NA	NA	NA	LOC113690395	LOC113710314	NA	LOC113738053	NA	LOC113690677	LOC113709594	NA	NA	LOC113710936	LOC113703402	LOC113719271	LOC113738168	NA	LOC113699708	LOC113697002
LOC113742576	LOC113695393	LOC113697871	LOC113714992	LOC113708583	LOC113707838	NA	NA	NA	LOC113722458	LOC113742367	NA	LOC113711911	NA	LOC113738163	LOC113728072	NA	NA	LOC113727169	LOC113741182	LOC113728716	LOC113730368	NA	LOC113710194	LOC113741312
LOC113707982	LOC113739415	LOC113738143	LOC113738160	LOC113698767	LOC113693619	NA	NA	NA	LOC113710511	LOC113736651	NA	LOC113706336	NA	LOC113702132	LOC113701493	NA	NA	LOC113705222	LOC113713819	LOC113708668	LOC113735000	NA	LOC113734237	LOC113702007
LOC113733257	LOC113730598	LOC113725018	LOC113692648	LOC113738377	LOC113742553	NA	NA	NA	LOC113725923	LOC113729978	NA	LOC113707875	NA	LOC113716844	LOC113700550	NA	NA	LOC113724592	LOC113697574	LOC113742328	LOC113739823	NA	LOC113741234	LOC113731731
LOC113726974	LOC113716964	LOC113712068	LOC113719360	LOC113731611	LOC113699398	NA	NA	NA	LOC113693793	LOC113705370	NA	LOC113732302	NA	LOC113714589	LOC113725929	NA	NA	NA	LOC113708849	LOC113719732	LOC113738160	NA	LOC113717555	LOC113719705
LOC113734666	LOC113743690	LOC113714525	LOC113699931	LOC113729902	LOC113741482	NA	NA	NA	LOC113706759	LOC113726864	NA	LOC113726810	NA	LOC113695342	LOC113719523	NA	NA	NA	LOC113722711	LOC113740330	LOC113734051	NA	LOC113733118	LOC113732150
LOC113693646	LOC113696119	LOC113708090	LOC113725931	LOC113734425	LOC113704697	NA	NA	NA	LOC113702140	LOC113700609	NA	LOC113699330	NA	LOC113701745	LOC113690099	NA	NA	NA	LOC113694536	LOC113740284	LOC113698689	NA	LOC113714992	LOC113699192
LOC113716760	LOC113716339	LOC113715228	LOC113711089	LOC113732323	LOC113727968	NA	NA	NA	LOC113732958	LOC113716862	NA	LOC113740251	NA	LOC113710606	LOC113730873	NA	NA	NA	LOC113739556	LOC113711717	LOC113742060	NA	LOC113711001	LOC113699001
LOC113720659	LOC113727061	LOC113739836	LOC113734051	LOC113736248	LOC113693753	NA	NA	NA	LOC113710490	LOC113714741	NA	LOC113701067	NA	LOC113698197	LOC113690895	NA	NA	NA	LOC113712607	LOC113716968	NA	NA	LOC113726768	LOC113725212
LOC113725732	LOC113702690	LOC113725636	LOC113727169	LOC113712295	LOC113702323	NA	NA	NA	LOC113710186	LOC113725750	NA	LOC113742008	NA	LOC113704388	LOC113708939	NA	NA	NA	LOC113730434	LOC113733292	NA	NA	LOC113732341	LOC113706710
LOC113692632	LOC113692862	LOC113716680	LOC113719623	LOC113736605	LOC113707291	NA	NA	NA	LOC113739591	LOC113702274	NA	LOC113740306	NA	LOC113743770	LOC113709285	NA	NA	NA	LOC113692053	LOC113719067	NA	NA	LOC113705474	LOC113742785
LOC113695079	LOC113718965	LOC113722933	LOC113710299	LOC113736243	LOC113709923	NA	NA	NA	LOC113690278	LOC113697195	NA	LOC113708053	NA	LOC113697057	LOC113726919	NA	NA	NA	LOC113717221	LOC113708812	NA	NA	LOC113714526	LOC113696185
LOC113742629	LOC113715658	LOC113726941	LOC113717276	LOC113696246	LOC113703009	NA	NA	NA	LOC113690242	LOC113734980	NA	LOC113733711	NA	LOC113737074	LOC113736217	NA	NA	NA	LOC113690784	LOC113711910	NA	NA	LOC113719360	LOC113704290
LOC113729968	LOC113688052	LOC113722738	NA	LOC113690072	LOC113736056	NA	NA	NA	LOC113693720	LOC113733059	NA	LOC113742632	NA	LOC113736267	LOC113719654	NA	NA	NA	LOC113707767	LOC113736195	NA	NA	LOC113702902	LOC113734976
LOC113694062	LOC113732236	LOC113700431	NA	LOC113705663	LOC113714781	NA	NA	NA	LOC113695879	LOC113693759	NA	LOC113692678	NA	LOC113724862	LOC113734499	NA	NA	NA	LOC113690395	LOC113703312	NA	NA	LOC113734051	LOC113709249
LOC113690967	LOC113710194	LOC113693563	NA	LOC113704407	LOC113688460	NA	NA	NA	LOC113710405	LOC113696237	NA	LOC113734270	NA	LOC113715081	LOC113722858	NA	NA	NA	LOC113725018	LOC113692138	NA	NA	LOC113727169	LOC113688550
LOC113730764	LOC113719179	LOC113729918	NA	LOC113701832	LOC113730629	NA	NA	NA	LOC113688879	LOC113702777	NA	LOC113711939	NA	LOC113694997	LOC113716407	NA	NA	NA	LOC113702420	LOC113699261	NA	NA	LOC113732369	LOC113698361
LOC113704662	LOC113738168	LOC113732104	NA	LOC113730813	LOC113726394	NA	NA	NA	LOC113715479	LOC113719434	NA	LOC113732983	NA	LOC113738410	LOC113702355	NA	NA	NA	LOC113725923	LOC113717654	NA	NA	LOC113707429	LOC113714942
LOC113734086	LOC113735233	LOC113690430	NA	LOC113707161	LOC113729624	NA	NA	NA	LOC113725350	LOC113697104	NA	LOC113694620	NA	LOC113693128	LOC113710296	NA	NA	NA	LOC113699057	LOC113731202	NA	NA	LOC113705222	LOC113709088
LOC113690228	LOC113727590	LOC113730683	NA	LOC113710364	LOC113703516	NA	NA	NA	LOC113703910	LOC113729943	NA	LOC113734772	NA	LOC113742679	LOC113715200	NA	NA	NA	LOC113693793	LOC113701867	NA	NA	LOC113717276	LOC113707832
LOC113732448	LOC113734635	LOC113726614	NA	LOC113736412	LOC113718979	NA	NA	NA	LOC113705530	LOC113698117	NA	LOC113705478	NA	LOC113717035	LOC113732130	NA	NA	NA	LOC113731555	LOC113730163	NA	NA	NA	LOC113712470
LOC113690528	LOC113735000	LOC113743378	NA	LOC113714491	LOC113730558	NA	NA	NA	LOC113734990	LOC113742551	NA	LOC113734181	NA	LOC113742319	LOC113701382	NA	NA	NA	LOC113712275	LOC113717302	NA	NA	NA	LOC113700435
LOC113733841	LOC113711001	LOC113694904	NA	LOC113696175	LOC113690340	NA	NA	NA	LOC113719558	LOC113717604	NA	LOC113687969	NA	LOC113713297	LOC113716892	NA	NA	NA	LOC113702279	LOC113692717	NA	NA	NA	LOC113733022
LOC113705377	LOC113739823	LOC113698064	NA	LOC113716981	LOC113691333	NA	NA	NA	LOC113716493	LOC113731724	NA	LOC113708409	NA	LOC113731174	LOC113743749	NA	NA	NA	LOC113716755	LOC113743199	NA	NA	NA	LOC113715125
LOC113731472	LOC113703114	LOC113719450	NA	LOC113699327	LOC113690404	NA	NA	NA	LOC113710221	LOC113742801	NA	LOC113731864	NA	LOC113710341	LOC113711964	NA	NA	NA	LOC113732958	LOC113698869	NA	NA	NA	LOC113697074
LOC113722453	LOC113726768	LOC113697774	NA	LOC113717793	LOC113742810	NA	NA	NA	LOC113710408	LOC113690878	NA	LOC113730916	NA	LOC113713829	LOC113725223	NA	NA	NA	LOC113734505	LOC113702889	NA	NA	NA	LOC113723990
LOC113728035	LOC113738160	LOC113694077	NA	LOC113725812	LOC113740023	NA	NA	NA	LOC113727865	LOC113742553	NA	LOC113696006	NA	LOC113690253	LOC113687999	NA	NA	NA	LOC113714585	LOC113716842	NA	NA	NA	LOC113718022
LOC113725016	LOC113703566	LOC113725505	NA	LOC113710477	LOC113689888	NA	NA	NA	LOC113724744	LOC113690595	NA	LOC113712805	NA	LOC113698838	LOC113703460	NA	NA	NA	LOC113725636	LOC113702713	NA	NA	NA	LOC113732887
LOC113694131	LOC113701692	LOC113740353	NA	LOC113738095	LOC113709684	NA	NA	NA	LOC113694904	LOC113710383	NA	LOC113731842	NA	LOC113732758	LOC113690004	NA	NA	NA	LOC113722738	LOC113730836	NA	NA	NA	LOC113730050
LOC113715148	LOC113701041	LOC113719357	NA	LOC113706974	LOC113719232	NA	NA	NA	LOC113719259	LOC113730913	NA	LOC113727590	NA	LOC113703133	LOC113704229	NA	NA	NA	LOC113739554	LOC113708840	NA	NA	NA	LOC113709453
LOC113726642	LOC113697121	LOC113695945	NA	LOC113732438	LOC113707743	NA	NA	NA	LOC113690516	LOC113709923	NA	LOC113706737	NA	LOC113725251	LOC113714684	NA	NA	NA	LOC113699097	LOC113691402	NA	NA	NA	LOC113733934
LOC113731972	LOC113690337	LOC113690677	NA	LOC113708643	LOC113694929	NA	NA	NA	LOC113727088	LOC113730289	NA	LOC113719679	NA	LOC113703414	LOC113692667	NA	NA	NA	LOC113732654	LOC113740435	NA	NA	NA	LOC113703513
LOC113724513	NA	LOC113738163	NA	LOC113743810	LOC113723121	NA	NA	NA	LOC113719450	LOC113688460	NA	LOC113725173	NA	LOC113691841	LOC113697061	NA	NA	NA	LOC113728113	LOC113724698	NA	NA	NA	LOC113722998
LOC113712811	NA	LOC113731619	NA	LOC113701421	LOC113733614	NA	NA	NA	LOC113733276	LOC113730629	NA	LOC113717310	NA	LOC113692786	LOC113717575	NA	NA	NA	LOC113715479	LOC113734079	NA	NA	NA	LOC113725052
LOC113724903	NA	LOC113712388	NA	LOC113688250	LOC113719070	NA	NA	NA	LOC113714668	LOC113743493	NA	LOC113714526	NA	LOC113731009	LOC113708668	NA	NA	NA	LOC113717304	LOC113688243	NA	NA	NA	LOC113714571
LOC113699032	NA	LOC113728092	NA	LOC113712812	LOC113702662	NA	NA	NA	LOC113743037	LOC113708283	NA	LOC113695864	NA	LOC113712195	LOC113742328	NA	NA	NA	LOC113705530	LOC113731845	NA	NA	NA	LOC113719660
LOC113732210	NA	LOC113730554	NA	LOC113708657	LOC113710203	NA	NA	NA	LOC113696254	LOC113699105	NA	LOC113734051	NA	LOC113717958	LOC113732400	NA	NA	NA	LOC113690392	LOC113703106	NA	NA	NA	LOC113726580
LOC113690088	NA	LOC113701314	NA	LOC113702939	LOC113702375	NA	NA	NA	LOC113731383	LOC113702106	NA	LOC113717148	NA	LOC113730811	LOC113690435	NA	NA	NA	LOC113731481	LOC113707766	NA	NA	NA	LOC113690962
LOC113726074	NA	LOC113736371	NA	LOC113736809	LOC113741464	NA	NA	NA	LOC113702132	LOC113694732	NA	LOC113734696	NA	LOC113696086	LOC113704278	NA	NA	NA	LOC113733044	LOC113742312	NA	NA	NA	LOC113734462
LOC113732496	NA	LOC113719554	NA	LOC113700127	LOC113736785	NA	NA	NA	LOC113693969	LOC113704032	NA	NA	NA	LOC113701859	LOC113724910	NA	NA	NA	LOC113705066	LOC113702858	NA	NA	NA	LOC113691494
LOC113731295	NA	LOC113733853	NA	LOC113690759	LOC113712454	NA	NA	NA	LOC113742223	LOC113729624	NA	NA	NA	LOC113707473	LOC113700339	NA	NA	NA	LOC113701286	LOC113691650	NA	NA	NA	LOC113696088
LOC113688896	NA	LOC113688264	NA	LOC113714934	LOC113699189	NA	NA	NA	LOC113707215	LOC113703516	NA	NA	NA	LOC113694207	LOC113703602	NA	NA	NA	LOC113711714	LOC113697615	NA	NA	NA	LOC113736584
LOC113725122	NA	LOC113703090	NA	LOC113725693	LOC113734465	NA	NA	NA	LOC113732542	LOC113703610	NA	NA	NA	LOC113734800	LOC113719067	NA	NA	NA	LOC113719450	LOC113690785	NA	NA	NA	LOC113716380
LOC113718345	NA	LOC113727936	NA	LOC113701847	LOC113732444	NA	NA	NA	LOC113726174	LOC113706433	NA	NA	NA	LOC113690508	LOC113708812	NA	NA	NA	LOC113714780	LOC113692522	NA	NA	NA	LOC113716397
LOC113724951	NA	LOC113699108	NA	LOC113697002	LOC113689994	NA	NA	NA	LOC113698197	LOC113718979	NA	NA	NA	LOC113725458	LOC113723515	NA	NA	NA	LOC113702079	LOC113701250	NA	NA	NA	LOC113715142
LOC113732689	NA	LOC113701022	NA	LOC113715465	LOC113714206	NA	NA	NA	LOC113731292	LOC113690340	NA	NA	NA	LOC113717701	LOC113699319	NA	NA	NA	LOC113741593	LOC113702208	NA	NA	NA	LOC113697574
LOC113735044	NA	LOC113708862	NA	LOC113715709	LOC113695835	NA	NA	NA	LOC113740057	LOC113691333	NA	NA	NA	LOC113715220	LOC113732290	NA	NA	NA	LOC113728092	LOC113731760	NA	NA	NA	LOC113739556
LOC113728164	NA	LOC113717945	NA	LOC113727280	LOC113729479	NA	NA	NA	LOC113697793	LOC113707926	NA	NA	NA	LOC113722811	LOC113717654	NA	NA	NA	LOC113689008	LOC113728021	NA	NA	NA	LOC113729914
LOC113730138	NA	LOC113695947	NA	LOC113711383	LOC113696039	NA	NA	NA	LOC113692753	LOC113719232	NA	NA	NA	LOC113714693	LOC113698540	NA	NA	NA	LOC113706747	LOC113728523	NA	NA	NA	LOC113730434
LOC113714462	NA	LOC113732410	NA	LOC113688924	LOC113707197	NA	NA	NA	LOC113712957	LOC113710444	NA	NA	NA	LOC113688459	LOC113731202	NA	NA	NA	LOC113732389	LOC113726864	NA	NA	NA	LOC113736688
LOC113687987	NA	LOC113708852	NA	LOC113702007	LOC113691802	NA	NA	NA	LOC113742708	LOC113733137	NA	NA	NA	LOC113704134	LOC113701867	NA	NA	NA	LOC113703422	LOC113700609	NA	NA	NA	LOC113717221
LOC113727918	NA	LOC113716829	NA	LOC113731983	LOC113704336	NA	NA	NA	LOC113730575	LOC113688795	NA	NA	NA	LOC113687966	LOC113732687	NA	NA	NA	LOC113699048	LOC113725946	NA	NA	NA	LOC113690784
LOC113699573	NA	LOC113730396	NA	LOC113743370	LOC113701445	NA	NA	NA	LOC113698503	LOC113700077	NA	NA	NA	LOC113697369	LOC113734793	NA	NA	NA	LOC113734004	LOC113731241	NA	NA	NA	LOC113737002
LOC113706666	NA	LOC113731528	NA	LOC113725212	LOC113706688	NA	NA	NA	LOC113718703	LOC113694929	NA	NA	NA	LOC113733819	LOC113706915	NA	NA	NA	LOC113708949	LOC113710743	NA	NA	NA	LOC113692718
LOC113702115	NA	LOC113742985	NA	LOC113712739	LOC113743496	NA	NA	NA	LOC113717404	LOC113739811	NA	NA	NA	LOC113738006	LOC113693460	NA	NA	NA	LOC113732542	LOC113712057	NA	NA	NA	LOC113698339
LOC113727039	NA	LOC113698922	NA	LOC113716883	LOC113695243	NA	NA	NA	LOC113719211	LOC113723121	NA	NA	NA	LOC113703781	LOC113702889	NA	NA	NA	LOC113726174	LOC113708737	NA	NA	NA	LOC113708867
LOC113709594	NA	LOC113702764	NA	LOC113707312	LOC113726704	NA	NA	NA	LOC113710435	LOC113733614	NA	NA	NA	LOC113730809	LOC113707614	NA	NA	NA	LOC113707989	LOC113696781	NA	NA	NA	LOC113736792
LOC113728072	NA	LOC113708859	NA	LOC113705342	LOC113726511	NA	NA	NA	LOC113703482	LOC113719070	NA	NA	NA	LOC113726429	LOC113740435	NA	NA	NA	LOC113724925	LOC113718982	NA	NA	NA	LOC113687950
LOC113701493	NA	LOC113726276	NA	LOC113742785	LOC113713641	NA	NA	NA	LOC113727502	LOC113743447	NA	NA	NA	LOC113693903	LOC113688172	NA	NA	NA	LOC113692212	LOC113714741	NA	NA	NA	LOC113720785
LOC113700550	NA	LOC113741888	NA	LOC113704290	LOC113712746	NA	NA	NA	LOC113710341	LOC113690881	NA	NA	NA	LOC113743694	LOC113688243	NA	NA	NA	LOC113730788	LOC113738000	NA	NA	NA	LOC113725923
LOC113731209	NA	LOC113690634	NA	LOC113743531	LOC113708933	NA	NA	NA	LOC113698625	LOC113707034	NA	NA	NA	LOC113702767	LOC113720528	NA	NA	NA	LOC113734846	LOC113704073	NA	NA	NA	LOC113693793
LOC113690099	NA	LOC113726452	NA	LOC113688550	LOC113716422	NA	NA	NA	LOC113690253	LOC113720663	NA	NA	NA	LOC113704786	LOC113697071	NA	NA	NA	LOC113742296	LOC113707760	NA	NA	NA	LOC113706759
LOC113693756	NA	LOC113726083	NA	LOC113730734	LOC113709290	NA	NA	NA	LOC113726044	LOC113694589	NA	NA	NA	LOC113699954	LOC113730718	NA	NA	NA	LOC113688520	LOC113695979	NA	NA	NA	LOC113702279
LOC113717305	NA	LOC113742172	NA	LOC113704112	LOC113726398	NA	NA	NA	LOC113697843	LOC113727338	NA	NA	NA	LOC113729994	LOC113702339	NA	NA	NA	LOC113736267	LOC113693812	NA	NA	NA	LOC113732958
LOC113731667	NA	LOC113731332	NA	LOC113691543	LOC113741688	NA	NA	NA	LOC113741359	LOC113731920	NA	NA	NA	LOC113696193	LOC113742312	NA	NA	NA	LOC113695988	LOC113732795	NA	NA	NA	LOC113726422
LOC113710333	NA	LOC113687970	NA	LOC113706314	LOC113725599	NA	NA	NA	LOC113739692	LOC113689994	NA	NA	NA	LOC113692734	LOC113727602	NA	NA	NA	LOC113727365	LOC113712391	NA	NA	NA	LOC113710490
LOC113690895	NA	LOC113715332	NA	LOC113731941	LOC113694601	NA	NA	NA	LOC113693638	LOC113731644	NA	NA	NA	LOC113724999	LOC113712186	NA	NA	NA	LOC113694229	LOC113733088	NA	NA	NA	LOC113694141
LOC113733359	NA	LOC113690566	NA	LOC113742744	LOC113717339	NA	NA	NA	LOC113716979	LOC113742921	NA	NA	NA	LOC113734339	LOC113710314	NA	NA	NA	LOC113737995	LOC113734980	NA	NA	NA	LOC113714585
LOC113734476	NA	LOC113701799	NA	LOC113708087	LOC113699953	NA	NA	NA	LOC113708615	LOC113695835	NA	NA	NA	LOC113692051	LOC113735035	NA	NA	NA	LOC113730575	LOC113732412	NA	NA	NA	LOC113719073
LOC113704917	NA	LOC113722826	NA	LOC113715125	LOC113722896	NA	NA	NA	LOC113689704	LOC113696039	NA	NA	NA	LOC113728226	LOC113710187	NA	NA	NA	LOC113715081	LOC113693759	NA	NA	NA	LOC113701556
LOC113707366	NA	LOC113727268	NA	LOC113697074	LOC113700151	NA	NA	NA	LOC113708686	LOC113707197	NA	NA	NA	LOC113710436	LOC113701250	NA	NA	NA	LOC113730975	LOC113731553	NA	NA	NA	LOC113690242
LOC113701673	NA	LOC113709299	NA	LOC113722174	LOC113710207	NA	NA	NA	LOC113702343	LOC113731460	NA	NA	NA	LOC113729700	LOC113705370	NA	NA	NA	LOC113701348	LOC113706984	NA	NA	NA	LOC113708980
LOC113690848	NA	LOC113712692	NA	LOC113723990	LOC113704048	NA	NA	NA	LOC113693814	LOC113704336	NA	NA	NA	LOC113735040	LOC113707423	NA	NA	NA	LOC113738410	LOC113728521	NA	NA	NA	LOC113706965
LOC113735246	NA	LOC113693638	NA	LOC113732887	LOC113696140	NA	NA	NA	LOC113738182	LOC113714500	NA	NA	NA	LOC113734038	LOC113717166	NA	NA	NA	LOC113719211	LOC113698720	NA	NA	NA	LOC113701157
LOC113736217	NA	LOC113705051	NA	LOC113688177	LOC113719137	NA	NA	NA	LOC113732446	LOC113705536	NA	NA	NA	LOC113730524	LOC113725946	NA	NA	NA	LOC113693128	LOC113729943	NA	NA	NA	LOC113733297
LOC113734499	NA	LOC113699858	NA	LOC113704133	LOC113699377	NA	NA	NA	LOC113702762	LOC113730244	NA	NA	NA	LOC113732787	LOC113714911	NA	NA	NA	LOC113731469	LOC113742551	NA	NA	NA	LOC113732654
LOC113712327	NA	LOC113730458	NA	LOC113711467	LOC113693723	NA	NA	NA	LOC113701598	LOC113743496	NA	NA	NA	LOC113735212	LOC113702205	NA	NA	NA	LOC113698922	LOC113708696	NA	NA	NA	LOC113688037
LOC113716768	NA	LOC113714861	NA	LOC113722998	LOC113701563	NA	NA	NA	LOC113695516	LOC113713641	NA	NA	NA	LOC113739696	LOC113708737	NA	NA	NA	LOC113742679	LOC113731658	NA	NA	NA	LOC113697543
LOC113688163	NA	LOC113715147	NA	LOC113724872	LOC113712815	NA	NA	NA	LOC113712198	LOC113742803	NA	NA	NA	LOC113718037	LOC113718982	NA	NA	NA	LOC113701412	LOC113715266	NA	NA	NA	LOC113690391
LOC113716407	NA	LOC113725944	NA	LOC113730431	LOC113727614	NA	NA	NA	LOC113726842	LOC113707757	NA	NA	NA	LOC113726463	LOC113714741	NA	NA	NA	LOC113701285	LOC113717203	NA	NA	NA	LOC113734990
LOC113696998	NA	LOC113730089	NA	LOC113732554	LOC113707894	NA	NA	NA	LOC113740182	LOC113698371	NA	NA	NA	LOC113691370	LOC113738000	NA	NA	NA	LOC113710435	LOC113727714	NA	NA	NA	LOC113692882
LOC113718964	NA	LOC113730183	NA	LOC113719660	LOC113714648	NA	NA	NA	LOC113701859	LOC113712394	NA	NA	NA	LOC113712868	LOC113712401	NA	NA	NA	LOC113713297	LOC113690878	NA	NA	NA	LOC113697464
LOC113697973	NA	LOC113718688	NA	LOC113726580	LOC113690309	NA	NA	NA	LOC113696031	LOC113709290	NA	NA	NA	LOC113738822	LOC113716943	NA	NA	NA	LOC113702692	LOC113725915	NA	NA	NA	LOC113716493
LOC113693743	NA	LOC113735157	NA	LOC113693525	LOC113689912	NA	NA	NA	LOC113734800	LOC113741688	NA	NA	NA	LOC113694620	LOC113704073	NA	NA	NA	LOC113727502	LOC113714634	NA	NA	NA	LOC113710221
LOC113707267	NA	LOC113725155	NA	LOC113730980	LOC113736780	NA	NA	NA	LOC113690508	LOC113691707	NA	NA	NA	LOC113698178	LOC113707760	NA	NA	NA	LOC113727336	LOC113693998	NA	NA	NA	LOC113697031
LOC113727135	NA	LOC113690367	NA	LOC113690962	LOC113708757	NA	NA	NA	LOC113725458	LOC113735620	NA	NA	NA	LOC113739708	LOC113732781	NA	NA	NA	LOC113696186	LOC113730660	NA	NA	NA	LOC113742581
LOC113742262	NA	LOC113699242	NA	LOC113690970	LOC113733909	NA	NA	NA	LOC113717701	LOC113694601	NA	NA	NA	LOC113723656	LOC113734210	NA	NA	NA	LOC113690634	LOC113690595	NA	NA	NA	LOC113702077
LOC113691658	NA	LOC113696031	NA	LOC113717160	LOC113692755	NA	NA	NA	LOC113715220	LOC113706922	NA	NA	NA	LOC113708917	LOC113725750	NA	NA	NA	LOC113696838	LOC113710927	NA	NA	NA	LOC113698064
LOC113701382	NA	LOC113702001	NA	LOC113691562	LOC113712479	NA	NA	NA	LOC113695469	LOC113706940	NA	NA	NA	LOC113715032	LOC113697195	NA	NA	NA	LOC113690253	LOC113734027	NA	NA	NA	LOC113705283
LOC113717366	NA	LOC113701691	NA	LOC113722958	LOC113718792	NA	NA	NA	LOC113690688	LOC113717339	NA	NA	NA	LOC113717555	LOC113731553	NA	NA	NA	LOC113701570	LOC113715665	NA	NA	NA	LOC113702079
LOC113717355	NA	LOC113704179	NA	LOC113702465	LOC113726462	NA	NA	NA	LOC113734489	LOC113736932	NA	NA	NA	LOC113712805	LOC113698720	NA	NA	NA	LOC113732758	LOC113727968	NA	NA	NA	LOC113726920
LOC113725223	NA	LOC113734183	NA	LOC113688060	LOC113739734	NA	NA	NA	LOC113700516	LOC113722896	NA	NA	NA	LOC113697514	LOC113719434	NA	NA	NA	LOC113690347	LOC113702675	NA	NA	NA	LOC113734026
LOC113690349	NA	LOC113726070	NA	LOC113736711	LOC113724790	NA	NA	NA	LOC113734298	LOC113742807	NA	NA	NA	LOC113697006	LOC113701473	NA	NA	NA	LOC113717857	LOC113724965	NA	NA	NA	LOC113693969
LOC113708062	NA	LOC113719422	NA	LOC113738124	LOC113712382	NA	NA	NA	LOC113734865	LOC113710207	NA	NA	NA	LOC113742277	LOC113729943	NA	NA	NA	LOC113702343	LOC113693753	NA	NA	NA	LOC113740156
LOC113729929	NA	LOC113728057	NA	LOC113707389	LOC113732796	NA	NA	NA	LOC113727643	LOC113704048	NA	NA	NA	LOC113713805	LOC113727001	NA	NA	NA	LOC113697473	LOC113702160	NA	NA	NA	LOC113742223
LOC113690538	NA	LOC113692539	NA	LOC113702215	LOC113705982	NA	NA	NA	LOC113738487	LOC113719137	NA	NA	NA	LOC113695896	LOC113742551	NA	NA	NA	LOC113703414	LOC113705647	NA	NA	NA	LOC113703422
LOC113690004	NA	LOC113732683	NA	LOC113732981	LOC113732480	NA	NA	NA	LOC113717955	LOC113694823	NA	NA	NA	LOC113736611	LOC113693781	NA	NA	NA	LOC113731953	LOC113695038	NA	NA	NA	LOC113703693
LOC113700064	NA	LOC113734489	NA	LOC113716397	LOC113719328	NA	NA	NA	LOC113733819	LOC113693723	NA	NA	NA	LOC113719360	LOC113731658	NA	NA	NA	LOC113710293	LOC113697761	NA	NA	NA	LOC113699048
LOC113701132	NA	LOC113725292	NA	LOC113712290	LOC113719153	NA	NA	NA	LOC113703781	LOC113712815	NA	NA	NA	LOC113699077	LOC113731724	NA	NA	NA	LOC113692786	LOC113740699	NA	NA	NA	LOC113707488
LOC113723075	NA	LOC113725391	NA	LOC113719279	LOC113726967	NA	NA	NA	LOC113731409	LOC113696135	NA	NA	NA	LOC113712193	LOC113742801	NA	NA	NA	LOC113701598	LOC113716807	NA	NA	NA	LOC113707989
LOC113704229	NA	LOC113739861	NA	LOC113713890	LOC113743773	NA	NA	NA	LOC113719132	LOC113707894	NA	NA	NA	LOC113730979	LOC113714572	NA	NA	NA	LOC113734170	LOC113714781	NA	NA	NA	LOC113688264
LOC113689618	NA	LOC113731836	NA	LOC113728033	LOC113694257	NA	NA	NA	LOC113725506	LOC113714648	NA	NA	NA	LOC113725466	LOC113742553	NA	NA	NA	LOC113694015	LOC113698820	NA	NA	NA	LOC113704388
LOC113719258	NA	LOC113730622	NA	LOC113697574	LOC113704075	NA	NA	NA	LOC113725868	LOC113690309	NA	NA	NA	LOC113738092	LOC113725915	NA	NA	NA	LOC113730811	LOC113742699	NA	NA	NA	LOC113724925
LOC113710940	NA	LOC113698692	NA	LOC113705141	LOC113738250	NA	NA	NA	LOC113741304	LOC113701117	NA	NA	NA	LOC113731264	LOC113714634	NA	NA	NA	LOC113707473	LOC113732539	NA	NA	NA	LOC113692212
LOC113711883	NA	LOC113734545	NA	LOC113722711	LOC113717205	NA	NA	NA	LOC113702767	LOC113689912	NA	NA	NA	LOC113715122	LOC113704697	NA	NA	NA	LOC113714792	LOC113707318	NA	NA	NA	LOC113722930
LOC113734702	NA	LOC113690567	NA	LOC113694536	LOC113704371	NA	NA	NA	LOC113717804	LOC113732083	NA	NA	NA	LOC113717276	LOC113715665	NA	NA	NA	LOC113694207	LOC113690510	NA	NA	NA	LOC113727684
LOC113714684	NA	LOC113733966	NA	LOC113718034	LOC113710374	NA	NA	NA	LOC113732630	LOC113708757	NA	NA	NA	NA	LOC113702675	NA	NA	NA	LOC113690460	LOC113734845	NA	NA	NA	LOC113742296
LOC113726735	NA	LOC113687966	NA	LOC113712607	LOC113712950	NA	NA	NA	LOC113692734	LOC113700190	NA	NA	NA	NA	LOC113696123	NA	NA	NA	LOC113734800	LOC113708785	NA	NA	NA	LOC113738773
LOC113740371	NA	LOC113727455	NA	LOC113725723	LOC113732832	NA	NA	NA	LOC113724999	LOC113692755	NA	NA	NA	NA	LOC113695038	NA	NA	NA	LOC113709119	LOC113692226	NA	NA	NA	LOC113688520
LOC113692667	NA	LOC113743060	NA	LOC113719006	LOC113731225	NA	NA	NA	LOC113691392	LOC113732796	NA	NA	NA	NA	LOC113740699	NA	NA	NA	LOC113695469	LOC113703516	NA	NA	NA	LOC113702128
LOC113697061	NA	LOC113731298	NA	LOC113733009	LOC113699100	NA	NA	NA	LOC113699260	LOC113705982	NA	NA	NA	NA	LOC113714781	NA	NA	NA	LOC113711662	LOC113710193	NA	NA	NA	LOC113712957
LOC113715732	NA	LOC113725713	NA	LOC113702775	LOC113690393	NA	NA	NA	LOC113735169	LOC113732480	NA	NA	NA	NA	LOC113731589	NA	NA	NA	LOC113732509	LOC113695805	NA	NA	NA	LOC113727365
LOC113698006	NA	LOC113695145	NA	LOC113730434	LOC113691393	NA	NA	NA	LOC113707875	LOC113719328	NA	NA	NA	NA	LOC113708283	NA	NA	NA	LOC113706946	LOC113730558	NA	NA	NA	LOC113718685
LOC113692166	NA	LOC113724962	NA	LOC113715597	LOC113743390	NA	NA	NA	LOC113733667	LOC113718737	NA	NA	NA	NA	LOC113699105	NA	NA	NA	LOC113731413	LOC113731376	NA	NA	NA	LOC113719509
LOC113728716	NA	LOC113728213	NA	LOC113734763	LOC113702382	NA	NA	NA	LOC113725811	LOC113734067	NA	NA	NA	NA	LOC113742699	NA	NA	NA	LOC113700141	LOC113691333	NA	NA	NA	LOC113700135
LOC113699074	NA	LOC113714824	NA	LOC113690348	LOC113734304	NA	NA	NA	LOC113730524	LOC113719153	NA	NA	NA	NA	LOC113703362	NA	NA	NA	LOC113710577	LOC113726060	NA	NA	NA	LOC113730575
LOC113726155	NA	LOC113730981	NA	LOC113733272	LOC113731114	NA	NA	NA	LOC113735028	LOC113709876	NA	NA	NA	NA	LOC113694764	NA	NA	NA	LOC113688459	LOC113707926	NA	NA	NA	LOC113717634
LOC113708668	NA	LOC113729927	NA	LOC113707767	LOC113705631	NA	NA	NA	LOC113739696	LOC113742650	NA	NA	NA	NA	LOC113696972	NA	NA	NA	LOC113704134	LOC113740023	NA	NA	NA	LOC113698001
LOC113730491	NA	LOC113692275	NA	LOC113715484	LOC113710213	NA	NA	NA	LOC113693727	LOC113725277	NA	NA	NA	NA	LOC113703516	NA	NA	NA	LOC113727643	LOC113707295	NA	NA	NA	LOC113728203
LOC113698293	NA	LOC113691426	NA	LOC113690395	LOC113697588	NA	NA	NA	LOC113730598	LOC113706235	NA	NA	NA	NA	LOC113706433	NA	NA	NA	LOC113687966	LOC113708598	NA	NA	NA	LOC113695731
LOC113706495	NA	LOC113731445	NA	LOC113708883	LOC113725021	NA	NA	NA	LOC113697742	LOC113704033	NA	NA	NA	NA	LOC113718979	NA	NA	NA	LOC113694968	LOC113730108	NA	NA	NA	LOC113725329
LOC113726063	NA	LOC113698740	NA	LOC113722458	LOC113694239	NA	NA	NA	LOC113706651	LOC113735026	NA	NA	NA	NA	LOC113690455	NA	NA	NA	LOC113705580	LOC113694929	NA	NA	NA	LOC113742346
LOC113697280	NA	LOC113697488	NA	LOC113727253	LOC113702239	NA	NA	NA	LOC113733711	LOC113707858	NA	NA	NA	NA	LOC113731376	NA	NA	NA	LOC113714941	LOC113735089	NA	NA	NA	LOC113719211
LOC113704173	NA	LOC113734297	NA	LOC113736792	LOC113731488	NA	NA	NA	LOC113700440	LOC113701809	NA	NA	NA	NA	LOC113731887	NA	NA	NA	LOC113734493	LOC113726191	NA	NA	NA	LOC113718949
LOC113733292	NA	LOC113736978	NA	LOC113705314	LOC113693652	NA	NA	NA	LOC113692678	LOC113743662	NA	NA	NA	NA	LOC113726060	NA	NA	NA	LOC113690875	LOC113733614	NA	NA	NA	LOC113698922
LOC113719067	NA	LOC113707875	NA	LOC113731011	LOC113716813	NA	NA	NA	LOC113710484	LOC113708985	NA	NA	NA	NA	LOC113730698	NA	NA	NA	LOC113743304	LOC113688293	NA	NA	NA	LOC113698210
LOC113698738	NA	LOC113728703	NA	LOC113698951	LOC113722968	NA	NA	NA	LOC113702690	LOC113730084	NA	NA	NA	NA	LOC113707926	NA	NA	NA	LOC113742800	LOC113743447	NA	NA	NA	LOC113742679
LOC113723058	NA	LOC113710445	NA	LOC113737032	LOC113698755	NA	NA	NA	LOC113719331	LOC113691393	NA	NA	NA	NA	LOC113742810	NA	NA	NA	LOC113730809	LOC113691493	NA	NA	NA	LOC113725577
LOC113711910	NA	LOC113687960	NA	LOC113699057	LOC113688180	NA	NA	NA	LOC113698871	LOC113692835	NA	NA	NA	NA	LOC113740023	NA	NA	NA	LOC113706826	LOC113710203	NA	NA	NA	LOC113701285
LOC113699319	NA	LOC113693788	NA	LOC113693793	LOC113732102	NA	NA	NA	LOC113711081	LOC113692396	NA	NA	NA	NA	LOC113712677	NA	NA	NA	LOC113722789	LOC113701682	NA	NA	NA	LOC113706930
LOC113692138	NA	LOC113735212	NA	LOC113712068	LOC113702116	NA	NA	NA	LOC113688248	LOC113732899	NA	NA	NA	NA	LOC113688952	NA	NA	NA	LOC113712771	LOC113698757	NA	NA	NA	LOC113710435
LOC113699261	NA	LOC113740251	NA	LOC113706759	LOC113728150	NA	NA	NA	LOC113694620	LOC113725309	NA	NA	NA	NA	LOC113719232	NA	NA	NA	LOC113692734	LOC113733128	NA	NA	NA	LOC113736996
LOC113717349	NA	LOC113716964	NA	LOC113702279	LOC113698326	NA	NA	NA	LOC113730061	LOC113738025	NA	NA	NA	NA	LOC113710444	NA	NA	NA	LOC113734339	LOC113712291	NA	NA	NA	LOC113699630
LOC113698540	NA	LOC113692748	NA	LOC113732958	LOC113691623	NA	NA	NA	LOC113704091	LOC113693925	NA	NA	NA	NA	LOC113688795	NA	NA	NA	LOC113742106	LOC113714426	NA	NA	NA	LOC113738593
LOC113731202	NA	LOC113707356	NA	LOC113690760	LOC113729783	NA	NA	NA	LOC113719066	LOC113712040	NA	NA	NA	NA	LOC113730108	NA	NA	NA	LOC113732285	LOC113701900	NA	NA	NA	LOC113702877
LOC113701867	NA	LOC113692678	NA	LOC113701589	LOC113712595	NA	NA	NA	LOC113709465	LOC113697588	NA	NA	NA	NA	LOC113734809	NA	NA	NA	LOC113692051	LOC113736974	NA	NA	NA	LOC113729863
LOC113743199	NA	LOC113730646	NA	LOC113694141	LOC113725725	NA	NA	NA	LOC113718958	LOC113732370	NA	NA	NA	NA	LOC113700007	NA	NA	NA	LOC113736806	LOC113694589	NA	NA	NA	LOC113731174
LOC113698869	NA	LOC113726690	NA	LOC113739591	LOC113731718	NA	NA	NA	LOC113731841	LOC113730927	NA	NA	NA	NA	LOC113688293	NA	NA	NA	LOC113697085	LOC113698617	NA	NA	NA	LOC113696838
LOC113702889	NA	LOC113727026	NA	LOC113690278	LOC113728747	NA	NA	NA	LOC113742819	LOC113716813	NA	NA	NA	NA	LOC113690881	NA	NA	NA	LOC113706408	LOC113697914	NA	NA	NA	LOC113698625
LOC113718693	NA	LOC113732983	NA	LOC113702087	LOC113703651	NA	NA	NA	LOC113728161	LOC113732102	NA	NA	NA	NA	LOC113710203	NA	NA	NA	LOC113728226	LOC113696022	NA	NA	NA	LOC113702522
LOC113691296	NA	LOC113695212	NA	LOC113688937	LOC113742235	NA	NA	NA	LOC113695502	LOC113734243	NA	NA	NA	NA	LOC113724896	NA	NA	NA	LOC113710436	LOC113725717	NA	NA	NA	LOC113697843
LOC113730836	NA	LOC113701223	NA	LOC113736320	LOC113739996	NA	NA	NA	LOC113738008	LOC113705511	NA	NA	NA	NA	LOC113736785	NA	NA	NA	LOC113699260	LOC113731328	NA	NA	NA	LOC113712480
LOC113726648	NA	LOC113730061	NA	LOC113695879	LOC113699426	NA	NA	NA	LOC113733118	LOC113702116	NA	NA	NA	NA	LOC113743479	NA	NA	NA	LOC113733021	LOC113742921	NA	NA	NA	LOC113716979
LOC113734111	NA	LOC113701893	NA	LOC113722738	LOC113706699	NA	NA	NA	LOC113725173	LOC113728150	NA	NA	NA	NA	LOC113701900	NA	NA	NA	LOC113698641	LOC113696039	NA	NA	NA	LOC113716872
LOC113712676	NA	LOC113690517	NA	LOC113715479	LOC113690219	NA	NA	NA	LOC113703114	LOC113709229	NA	NA	NA	NA	LOC113720663	NA	NA	NA	LOC113725811	LOC113702878	NA	NA	NA	LOC113701474
LOC113708840	NA	LOC113708917	NA	LOC113725350	LOC113743267	NA	NA	NA	LOC113726768	LOC113715001	NA	NA	NA	NA	LOC113694589	NA	NA	NA	LOC113712708	LOC113731460	NA	NA	NA	LOC113728160
LOC113740435	NA	LOC113740434	NA	LOC113703910	LOC113719645	NA	NA	NA	LOC113738160	LOC113710895	NA	NA	NA	NA	LOC113742437	NA	NA	NA	LOC113727841	LOC113706688	NA	NA	NA	LOC113731953
LOC113707153	NA	LOC113724796	NA	LOC113705530	LOC113712361	NA	NA	NA	LOC113711005	LOC113707330	NA	NA	NA	NA	LOC113716782	NA	NA	NA	LOC113727685	LOC113705536	NA	NA	NA	LOC113693814
LOC113741344	NA	LOC113741423	NA	LOC113690392	LOC113743611	NA	NA	NA	LOC113709652	LOC113695068	NA	NA	NA	NA	LOC113712454	NA	NA	NA	LOC113705374	LOC113713708	NA	NA	NA	LOC113738182
LOC113702340	NA	LOC113741234	NA	LOC113716447	LOC113694930	NA	NA	NA	LOC113701487	LOC113710242	NA	NA	NA	NA	LOC113727338	NA	NA	NA	LOC113693727	LOC113695243	NA	NA	NA	LOC113708679
LOC113733325	NA	LOC113730916	NA	LOC113734990	LOC113739550	NA	NA	NA	LOC113716732	LOC113698326	NA	NA	NA	NA	LOC113742643	NA	NA	NA	LOC113730429	LOC113716637	NA	NA	NA	LOC113701598
LOC113697431	NA	LOC113703675	NA	LOC113703946	LOC113716772	NA	NA	NA	LOC113696226	LOC113729783	NA	NA	NA	NA	LOC113718980	NA	NA	NA	LOC113726069	LOC113738084	NA	NA	NA	LOC113742893
LOC113719183	NA	LOC113728161	NA	LOC113719558	LOC113706991	NA	NA	NA	LOC113725466	LOC113725725	NA	NA	NA	NA	LOC113741976	NA	NA	NA	LOC113727973	LOC113688600	NA	NA	NA	LOC113712198
LOC113720528	NA	LOC113712805	NA	LOC113702329	LOC113732331	NA	NA	NA	LOC113738092	LOC113726965	NA	NA	NA	NA	LOC113712242	NA	NA	NA	LOC113726463	LOC113742803	NA	NA	NA	LOC113734170
LOC113703106	NA	LOC113731842	NA	LOC113716493	LOC113727507	NA	NA	NA	LOC113731264	LOC113695684	NA	NA	NA	NA	LOC113725717	NA	NA	NA	LOC113706651	LOC113694755	NA	NA	NA	LOC113730811
LOC113707766	NA	LOC113697006	NA	LOC113701645	LOC113735088	NA	NA	NA	NA	LOC113706697	NA	NA	NA	NA	LOC113707064	NA	NA	NA	LOC113733711	LOC113707757	NA	NA	NA	LOC113687263
LOC113704992	NA	LOC113719269	NA	LOC113710408	LOC113693863	NA	NA	NA	NA	LOC113742235	NA	NA	NA	NA	LOC113691537	NA	NA	NA	LOC113697080	LOC113690239	NA	NA	NA	LOC113701859
LOC113691650	NA	LOC113711001	NA	LOC113701286	LOC113701456	NA	NA	NA	NA	LOC113691473	NA	NA	NA	NA	LOC113729479	NA	NA	NA	LOC113702690	LOC113708933	NA	NA	NA	LOC113707473
LOC113727602	NA	LOC113698756	NA	LOC113726851	LOC113741494	NA	NA	NA	NA	LOC113739996	NA	NA	NA	NA	LOC113696039	NA	NA	NA	LOC113710303	LOC113712394	NA	NA	NA	LOC113714792
LOC113710314	NA	LOC113726688	NA	LOC113694904	LOC113700096	NA	NA	NA	NA	LOC113732211	NA	NA	NA	NA	LOC113743496	NA	NA	NA	LOC113739728	LOC113725177	NA	NA	NA	LOC113714905
LOC113730692	NA	LOC113734384	NA	LOC113724924	LOC113714484	NA	NA	NA	NA	LOC113706699	NA	NA	NA	NA	LOC113726511	NA	NA	NA	LOC113725649	LOC113732852	NA	NA	NA	LOC113716817
LOC113697448	NA	LOC113731203	NA	LOC113698064	LOC113736352	NA	NA	NA	NA	LOC113717549	NA	NA	NA	NA	LOC113713641	NA	NA	NA	LOC113730061	LOC113716667	NA	NA	NA	LOC113694519
LOC113692522	NA	LOC113699931	NA	LOC113701840	LOC113713222	NA	NA	NA	NA	LOC113743267	NA	NA	NA	NA	LOC113742803	NA	NA	NA	LOC113710312	LOC113691707	NA	NA	NA	LOC113709119
LOC113710187	NA	LOC113719075	NA	LOC113694009	LOC113727527	NA	NA	NA	NA	LOC113719645	NA	NA	NA	NA	LOC113707757	NA	NA	NA	LOC113708901	LOC113735620	NA	NA	NA	LOC113738396
LOC113736651	NA	LOC113734051	NA	LOC113733276	LOC113739878	NA	NA	NA	NA	LOC113697741	NA	NA	NA	NA	LOC113703887	NA	NA	NA	LOC113708917	LOC113726914	NA	NA	NA	LOC113715153
LOC113731326	NA	LOC113707881	NA	LOC113714668	LOC113727924	NA	NA	NA	NA	LOC113688623	NA	NA	NA	NA	LOC113719213	NA	NA	NA	LOC113722799	LOC113725599	NA	NA	NA	LOC113719422
LOC113694530	NA	LOC113715708	NA	LOC113743037	LOC113701521	NA	NA	NA	NA	LOC113706898	NA	NA	NA	NA	LOC113718951	NA	NA	NA	LOC113731841	LOC113706940	NA	NA	NA	LOC113709592
LOC113740210	NA	LOC113713395	NA	LOC113711044	LOC113719713	NA	NA	NA	NA	LOC113732026	NA	NA	NA	NA	LOC113704027	NA	NA	NA	LOC113733094	LOC113717339	NA	NA	NA	LOC113701277
LOC113731760	NA	LOC113696297	NA	LOC113690677	LOC113738148	NA	NA	NA	NA	LOC113716772	NA	NA	NA	NA	LOC113708830	NA	NA	NA	LOC113719078	LOC113687930	NA	NA	NA	LOC113695469
LOC113731061	NA	LOC113734696	NA	LOC113716844	LOC113714458	NA	NA	NA	NA	LOC113706991	NA	NA	NA	NA	LOC113741688	NA	NA	NA	LOC113712805	LOC113700151	NA	NA	NA	LOC113727649
LOC113730263	NA	LOC113690337	NA	LOC113693969	LOC113697748	NA	NA	NA	NA	LOC113707268	NA	NA	NA	NA	LOC113691707	NA	NA	NA	LOC113695502	LOC113690019	NA	NA	NA	LOC113701235
LOC113722974	NA	NA	NA	LOC113706747	LOC113738210	NA	NA	NA	NA	LOC113734182	NA	NA	NA	NA	LOC113711266	NA	NA	NA	LOC113734635	LOC113699307	NA	NA	NA	LOC113693828
LOC113707423	NA	NA	NA	LOC113703693	LOC113691985	NA	NA	NA	NA	LOC113691560	NA	NA	NA	NA	LOC113725406	NA	NA	NA	LOC113731925	LOC113742176	NA	NA	NA	LOC113709215
LOC113716862	NA	NA	NA	LOC113742183	LOC113714818	NA	NA	NA	NA	LOC113727507	NA	NA	NA	NA	LOC113706940	NA	NA	NA	LOC113742277	LOC113717859	NA	NA	NA	LOC113694484
LOC113731474	NA	NA	NA	LOC113741483	LOC113692468	NA	NA	NA	NA	LOC113688053	NA	NA	NA	NA	LOC113722896	NA	NA	NA	LOC113738008	LOC113696140	NA	NA	NA	LOC113729970
LOC113733465	NA	NA	NA	LOC113715071	LOC113710801	NA	NA	NA	NA	LOC113727847	NA	NA	NA	NA	LOC113703987	NA	NA	NA	LOC113739826	LOC113719137	NA	NA	NA	LOC113700141
LOC113700175	NA	NA	NA	LOC113695342	LOC113728094	NA	NA	NA	NA	LOC113691922	NA	NA	NA	NA	LOC113699307	NA	NA	NA	LOC113713805	LOC113701563	NA	NA	NA	LOC113698971
LOC113731556	NA	NA	NA	LOC113701745	LOC113711733	NA	NA	NA	NA	LOC113741493	NA	NA	NA	NA	LOC113696140	NA	NA	NA	LOC113695896	LOC113697522	NA	NA	NA	LOC113742685
LOC113687886	NA	NA	NA	LOC113710606	LOC113716899	NA	NA	NA	NA	LOC113707424	NA	NA	NA	NA	LOC113719137	NA	NA	NA	LOC113703114	LOC113719541	NA	NA	NA	LOC113693643
LOC113699185	NA	NA	NA	LOC113698197	LOC113696154	NA	NA	NA	NA	LOC113691461	NA	NA	NA	NA	LOC113699377	NA	NA	NA	LOC113690526	LOC113736640	NA	NA	NA	LOC113704134
LOC113712801	NA	NA	NA	LOC113703090	LOC113739890	NA	NA	NA	NA	LOC113739878	NA	NA	NA	NA	LOC113689900	NA	NA	NA	LOC113736783	LOC113704983	NA	NA	NA	LOC113712671
LOC113714741	NA	NA	NA	LOC113731906	LOC113719601	NA	NA	NA	NA	LOC113727924	NA	NA	NA	NA	LOC113736640	NA	NA	NA	LOC113690662	LOC113716718	NA	NA	NA	LOC113710208
LOC113716943	NA	NA	NA	LOC113710905	LOC113727460	NA	NA	NA	NA	LOC113731126	NA	NA	NA	NA	LOC113704084	NA	NA	NA	LOC113736611	LOC113701117	NA	NA	NA	LOC113719052
LOC113734210	NA	NA	NA	LOC113716543	LOC113740437	NA	NA	NA	NA	LOC113693655	NA	NA	NA	NA	LOC113707894	NA	NA	NA	LOC113719360	LOC113689912	NA	NA	NA	LOC113687966
LOC113710276	NA	NA	NA	LOC113740057	LOC113704132	NA	NA	NA	NA	LOC113714818	NA	NA	NA	NA	LOC113738600	NA	NA	NA	LOC113731203	LOC113736780	NA	NA	NA	LOC113710385
LOC113707615	NA	NA	NA	LOC113697793	LOC113738127	NA	NA	NA	NA	LOC113729932	NA	NA	NA	NA	LOC113716718	NA	NA	NA	LOC113694891	LOC113739998	NA	NA	NA	LOC113743434
LOC113711725	NA	NA	NA	LOC113729865	LOC113701153	NA	NA	NA	NA	LOC113713017	NA	NA	NA	NA	LOC113714648	NA	NA	NA	LOC113701555	LOC113732083	NA	NA	NA	LOC113714941
LOC113743709	NA	NA	NA	LOC113743770	LOC113734851	NA	NA	NA	NA	LOC113734997	NA	NA	NA	NA	LOC113700190	NA	NA	NA	LOC113719244	LOC113727706	NA	NA	NA	LOC113687957
LOC113704354	NA	NA	NA	LOC113692753	LOC113688137	NA	NA	NA	NA	LOC113697923	NA	NA	NA	NA	LOC113692755	NA	NA	NA	LOC113736567	LOC113718792	NA	NA	NA	LOC113742800
LOC113709234	NA	NA	NA	LOC113736909	LOC113728230	NA	NA	NA	NA	LOC113716899	NA	NA	NA	NA	LOC113704142	NA	NA	NA	LOC113713412	LOC113732796	NA	NA	NA	LOC113703961
LOC113732412	NA	NA	NA	LOC113712957	LOC113697054	NA	NA	NA	NA	LOC113727742	NA	NA	NA	NA	LOC113724790	NA	NA	NA	LOC113714381	LOC113705982	NA	NA	NA	LOC113719637
LOC113691531	NA	NA	NA	LOC113731696	LOC113693956	NA	NA	NA	NA	LOC113700970	NA	NA	NA	NA	LOC113712382	NA	NA	NA	LOC113725466	LOC113719328	NA	NA	NA	LOC113725506
LOC113731553	NA	NA	NA	LOC113736267	LOC113707483	NA	NA	NA	NA	LOC113699355	NA	NA	NA	NA	LOC113694328	NA	NA	NA	LOC113724592	LOC113692871	NA	NA	NA	LOC113741526
LOC113694334	NA	NA	NA	LOC113694229	LOC113709230	NA	NA	NA	NA	LOC113739949	NA	NA	NA	NA	LOC113732796	NA	NA	NA	NA	LOC113692733	NA	NA	NA	LOC113732803
LOC113698720	NA	NA	NA	LOC113724862	LOC113699406	NA	NA	NA	NA	LOC113727460	NA	NA	NA	NA	LOC113705982	NA	NA	NA	NA	LOC113714888	NA	NA	NA	LOC113726694
LOC113742966	NA	NA	NA	LOC113733967	LOC113697091	NA	NA	NA	NA	LOC113704132	NA	NA	NA	NA	LOC113719328	NA	NA	NA	NA	LOC113709433	NA	NA	NA	LOC113743694
LOC113696237	NA	NA	NA	LOC113697193	LOC113704759	NA	NA	NA	NA	LOC113733299	NA	NA	NA	NA	LOC113692733	NA	NA	NA	NA	LOC113732615	NA	NA	NA	LOC113716965
LOC113714706	NA	NA	NA	LOC113730575	LOC113741718	NA	NA	NA	NA	LOC113738127	NA	NA	NA	NA	LOC113726762	NA	NA	NA	NA	LOC113707867	NA	NA	NA	LOC113729994
LOC113712710	NA	NA	NA	LOC113730975	LOC113742562	NA	NA	NA	NA	LOC113697432	NA	NA	NA	NA	LOC113732615	NA	NA	NA	NA	LOC113734067	NA	NA	NA	LOC113691741
LOC113712577	NA	NA	NA	LOC113718703	LOC113729811	NA	NA	NA	NA	LOC113701375	NA	NA	NA	NA	LOC113734067	NA	NA	NA	NA	LOC113738696	NA	NA	NA	LOC113692695
LOC113742551	NA	NA	NA	LOC113719211	LOC113712187	NA	NA	NA	NA	LOC113728230	NA	NA	NA	NA	LOC113732856	NA	NA	NA	NA	LOC113724786	NA	NA	NA	LOC113697552
LOC113708696	NA	NA	NA	LOC113739950	LOC113727383	NA	NA	NA	NA	LOC113726140	NA	NA	NA	NA	LOC113742569	NA	NA	NA	NA	LOC113716746	NA	NA	NA	LOC113734339
LOC113731668	NA	NA	NA	LOC113725577	LOC113697223	NA	NA	NA	NA	LOC113697311	NA	NA	NA	NA	LOC113738696	NA	NA	NA	NA	LOC113725277	NA	NA	NA	LOC113742106
LOC113693781	NA	NA	NA	LOC113701285	LOC113710250	NA	NA	NA	NA	LOC113698698	NA	NA	NA	NA	LOC113694477	NA	NA	NA	NA	LOC113688161	NA	NA	NA	LOC113697085
LOC113714932	NA	NA	NA	LOC113710435	LOC113705552	NA	NA	NA	NA	LOC113730988	NA	NA	NA	NA	LOC113742650	NA	NA	NA	NA	LOC113694749	NA	NA	NA	LOC113728226
LOC113731658	NA	NA	NA	LOC113703482	LOC113699253	NA	NA	NA	NA	LOC113742714	NA	NA	NA	NA	LOC113716746	NA	NA	NA	NA	LOC113691903	NA	NA	NA	LOC113698641
LOC113731724	NA	NA	NA	LOC113713297	LOC113697391	NA	NA	NA	NA	LOC113709230	NA	NA	NA	NA	LOC113702361	NA	NA	NA	NA	LOC113704371	NA	NA	NA	LOC113690413
LOC113727471	NA	NA	NA	LOC113702496	LOC113697273	NA	NA	NA	NA	LOC113688773	NA	NA	NA	NA	LOC113705545	NA	NA	NA	NA	LOC113710374	NA	NA	NA	LOC113688063
LOC113714572	NA	NA	NA	LOC113696838	LOC113742194	NA	NA	NA	NA	LOC113712994	NA	NA	NA	NA	LOC113706235	NA	NA	NA	NA	LOC113696259	NA	NA	NA	LOC113729895
LOC113707838	NA	NA	NA	LOC113698625	LOC113712314	NA	NA	NA	NA	LOC113692691	NA	NA	NA	NA	LOC113713181	NA	NA	NA	NA	LOC113699100	NA	NA	NA	LOC113731568
LOC113693619	NA	NA	NA	LOC113689863	LOC113690971	NA	NA	NA	NA	LOC113689556	NA	NA	NA	NA	LOC113704371	NA	NA	NA	NA	LOC113720135	NA	NA	NA	LOC113735029
LOC113714634	NA	NA	NA	LOC113698838	LOC113695889	NA	NA	NA	NA	LOC113702412	NA	NA	NA	NA	LOC113730046	NA	NA	NA	NA	LOC113716484	NA	NA	NA	LOC113688227
LOC113719699	NA	NA	NA	LOC113697843	LOC113707444	NA	NA	NA	NA	LOC113704759	NA	NA	NA	NA	LOC113732832	NA	NA	NA	NA	LOC113734867	NA	NA	NA	LOC113712708
LOC113729824	NA	NA	NA	LOC113739692	LOC113708893	NA	NA	NA	NA	LOC113724529	NA	NA	NA	NA	LOC113699100	NA	NA	NA	NA	LOC113724769	NA	NA	NA	LOC113733356
LOC113688832	NA	NA	NA	LOC113690140	LOC113721947	NA	NA	NA	NA	LOC113726836	NA	NA	NA	NA	LOC113699010	NA	NA	NA	NA	LOC113692396	NA	NA	NA	LOC113693727
LOC113710927	NA	NA	NA	LOC113716979	LOC113742620	NA	NA	NA	NA	LOC113692815	NA	NA	NA	NA	LOC113732822	NA	NA	NA	NA	LOC113743390	NA	NA	NA	LOC113738579
LOC113696123	NA	NA	NA	LOC113732047	LOC113718914	NA	NA	NA	NA	LOC113731574	NA	NA	NA	NA	LOC113730084	NA	NA	NA	NA	LOC113708976	NA	NA	NA	LOC113726463
LOC113728240	NA	NA	NA	LOC113702343	LOC113728148	NA	NA	NA	NA	LOC113716395	NA	NA	NA	NA	LOC113734867	NA	NA	NA	NA	LOC113734770	NA	NA	NA	LOC113734912
LOC113693711	NA	NA	NA	LOC113730458	LOC113708952	NA	NA	NA	NA	LOC113705552	NA	NA	NA	NA	LOC113710295	NA	NA	NA	NA	LOC113702382	NA	NA	NA	LOC113706651
LOC113699273	NA	NA	NA	LOC113693814	LOC113691045	NA	NA	NA	NA	LOC113715503	NA	NA	NA	NA	LOC113692835	NA	NA	NA	NA	LOC113732899	NA	NA	NA	LOC113734270
LOC113707291	NA	NA	NA	LOC113738182	LOC113727263	NA	NA	NA	NA	LOC113699253	NA	NA	NA	NA	LOC113692396	NA	NA	NA	NA	LOC113737891	NA	NA	NA	LOC113712356
LOC113694094	NA	NA	NA	LOC113708679	LOC113700455	NA	NA	NA	NA	LOC113697391	NA	NA	NA	NA	LOC113731804	NA	NA	NA	NA	LOC113703660	NA	NA	NA	LOC113719162
LOC113716807	NA	NA	NA	LOC113711815	LOC113711033	NA	NA	NA	NA	LOC113697273	NA	NA	NA	NA	LOC113702382	NA	NA	NA	NA	LOC113712347	NA	NA	NA	LOC113709717
LOC113714781	NA	NA	NA	LOC113701598	LOC113697027	NA	NA	NA	NA	LOC113690971	NA	NA	NA	NA	LOC113725309	NA	NA	NA	NA	LOC113729833	NA	NA	NA	LOC113725649
LOC113689690	NA	NA	NA	LOC113712198	LOC113692866	NA	NA	NA	NA	LOC113701789	NA	NA	NA	NA	LOC113737891	NA	NA	NA	NA	LOC113693621	NA	NA	NA	LOC113694620
LOC113699105	NA	NA	NA	LOC113719008	LOC113734405	NA	NA	NA	NA	LOC113706658	NA	NA	NA	NA	LOC113729833	NA	NA	NA	NA	LOC113738025	NA	NA	NA	LOC113739708
LOC113742699	NA	NA	NA	LOC113701298	LOC113739966	NA	NA	NA	NA	LOC113695889	NA	NA	NA	NA	LOC113693621	NA	NA	NA	NA	LOC113719214	NA	NA	NA	LOC113698075
LOC113732539	NA	NA	NA	LOC113708835	LOC113730672	NA	NA	NA	NA	LOC113732487	NA	NA	NA	NA	LOC113738025	NA	NA	NA	NA	LOC113710213	NA	NA	NA	LOC113690517
LOC113725806	NA	NA	NA	LOC113726842	LOC113717608	NA	NA	NA	NA	LOC113707444	NA	NA	NA	NA	LOC113705631	NA	NA	NA	NA	LOC113706257	NA	NA	NA	LOC113708917
LOC113742925	NA	NA	NA	LOC113730777	LOC113741181	NA	NA	NA	NA	LOC113703294	NA	NA	NA	NA	LOC113710213	NA	NA	NA	NA	LOC113712040	NA	NA	NA	LOC113709465
LOC113696972	NA	NA	NA	LOC113701859	LOC113712627	NA	NA	NA	NA	LOC113709702	NA	NA	NA	NA	LOC113704078	NA	NA	NA	NA	LOC113696143	NA	NA	NA	LOC113731841
LOC113726394	NA	NA	NA	LOC113738440	LOC113707413	NA	NA	NA	NA	LOC113725575	NA	NA	NA	NA	LOC113725021	NA	NA	NA	NA	LOC113692721	NA	NA	NA	LOC113719545
LOC113729624	NA	NA	NA	LOC113694207	LOC113717295	NA	NA	NA	NA	LOC113736201	NA	NA	NA	NA	LOC113701772	NA	NA	NA	NA	LOC113743705	NA	NA	NA	LOC113739585
LOC113692226	NA	NA	NA	LOC113734800	LOC113739749	NA	NA	NA	NA	LOC113694966	NA	NA	NA	NA	LOC113689779	NA	NA	NA	NA	LOC113710326	NA	NA	NA	LOC113728161
LOC113703516	NA	NA	NA	LOC113690508	LOC113716344	NA	NA	NA	NA	LOC113716727	NA	NA	NA	NA	LOC113743705	NA	NA	NA	NA	LOC113692150	NA	NA	NA	LOC113712805
LOC113700207	NA	NA	NA	LOC113715153	LOC113693880	NA	NA	NA	NA	LOC113728148	NA	NA	NA	NA	LOC113732102	NA	NA	NA	NA	LOC113698930	NA	NA	NA	LOC113695502
LOC113710419	NA	NA	NA	LOC113711662	LOC113723001	NA	NA	NA	NA	LOC113726658	NA	NA	NA	NA	LOC113732112	NA	NA	NA	NA	LOC113732102	NA	NA	NA	LOC113727590
LOC113703610	NA	NA	NA	LOC113690688	LOC113688229	NA	NA	NA	NA	LOC113691045	NA	NA	NA	NA	LOC113725718	NA	NA	NA	NA	LOC113711132	NA	NA	NA	LOC113704127
LOC113714466	NA	NA	NA	LOC113734489	LOC113696146	NA	NA	NA	NA	LOC113688330	NA	NA	NA	NA	LOC113732569	NA	NA	NA	NA	LOC113695068	NA	NA	NA	LOC113697514
LOC113718979	NA	NA	NA	LOC113741579	LOC113742127	NA	NA	NA	NA	LOC113690123	NA	NA	NA	NA	LOC113705511	NA	NA	NA	NA	LOC113736565	NA	NA	NA	LOC113717010
LOC113695805	NA	NA	NA	LOC113732509	LOC113697172	NA	NA	NA	NA	LOC113720643	NA	NA	NA	NA	LOC113736789	NA	NA	NA	NA	LOC113729783	NA	NA	NA	LOC113725054
LOC113730558	NA	NA	NA	LOC113695108	LOC113695065	NA	NA	NA	NA	LOC113711982	NA	NA	NA	NA	LOC113707330	NA	NA	NA	NA	LOC113692867	NA	NA	NA	LOC113739826
LOC113731376	NA	NA	NA	LOC113700141	LOC113723538	NA	NA	NA	NA	LOC113715418	NA	NA	NA	NA	LOC113710242	NA	NA	NA	NA	LOC113714459	NA	NA	NA	LOC113706571
LOC113690340	NA	NA	NA	LOC113696975	LOC113701340	NA	NA	NA	NA	LOC113734405	NA	NA	NA	NA	LOC113698326	NA	NA	NA	NA	LOC113722982	NA	NA	NA	LOC113735043
LOC113726060	NA	NA	NA	LOC113710208	LOC113701470	NA	NA	NA	NA	LOC113725374	NA	NA	NA	NA	LOC113727499	NA	NA	NA	NA	LOC113726965	NA	NA	NA	LOC113722638
LOC113742810	NA	NA	NA	LOC113687966	LOC113693934	NA	NA	NA	NA	LOC113710578	NA	NA	NA	NA	LOC113691623	NA	NA	NA	NA	LOC113728747	NA	NA	NA	LOC113699402
LOC113689888	NA	NA	NA	LOC113738487	LOC113701422	NA	NA	NA	NA	LOC113695709	NA	NA	NA	NA	LOC113729783	NA	NA	NA	NA	LOC113699295	NA	NA	NA	LOC113736611
LOC113712677	NA	NA	NA	LOC113733819	LOC113709828	NA	NA	NA	NA	LOC113736641	NA	NA	NA	NA	LOC113711017	NA	NA	NA	NA	LOC113692820	NA	NA	NA	LOC113709263
LOC113719232	NA	NA	NA	LOC113690875	LOC113731182	NA	NA	NA	NA	LOC113698806	NA	NA	NA	NA	LOC113725651	NA	NA	NA	NA	LOC113742235	NA	NA	NA	LOC113715621
LOC113707220	NA	NA	NA	LOC113699939	LOC113700033	NA	NA	NA	NA	LOC113712627	NA	NA	NA	NA	LOC113728747	NA	NA	NA	NA	LOC113715584	NA	NA	NA	LOC113731203
LOC113734809	NA	NA	NA	LOC113730809	LOC113697361	NA	NA	NA	NA	LOC113742316	NA	NA	NA	NA	LOC113714504	NA	NA	NA	NA	LOC113739996	NA	NA	NA	LOC113732963
LOC113733614	NA	NA	NA	LOC113719132	LOC113732765	NA	NA	NA	NA	LOC113688183	NA	NA	NA	NA	LOC113706697	NA	NA	NA	NA	LOC113692821	NA	NA	NA	LOC113694008
LOC113728075	NA	NA	NA	LOC113719005	LOC113732010	NA	NA	NA	NA	LOC113725382	NA	NA	NA	NA	LOC113742235	NA	NA	NA	NA	LOC113698591	NA	NA	NA	LOC113736567
LOC113710203	NA	NA	NA	LOC113730073	LOC113727988	NA	NA	NA	NA	LOC113739749	NA	NA	NA	NA	LOC113691473	NA	NA	NA	NA	LOC113743610	NA	NA	NA	LOC113717283
LOC113701682	NA	NA	NA	LOC113741526	LOC113701727	NA	NA	NA	NA	LOC113741568	NA	NA	NA	NA	LOC113692821	NA	NA	NA	NA	LOC113694174	NA	NA	NA	LOC113729888
LOC113702375	NA	NA	NA	LOC113741304	LOC113716815	NA	NA	NA	NA	LOC113694249	NA	NA	NA	NA	LOC113714297	NA	NA	NA	NA	LOC113726542	NA	NA	NA	LOC113714381
LOC113733128	NA	NA	NA	LOC113742181	LOC113707234	NA	NA	NA	NA	LOC113694219	NA	NA	NA	NA	LOC113708794	NA	NA	NA	NA	LOC113719645	NA	NA	NA	LOC113716732
LOC113727688	NA	NA	NA	LOC113703877	LOC113700206	NA	NA	NA	NA	LOC113712190	NA	NA	NA	NA	LOC113690219	NA	NA	NA	NA	LOC113712361	NA	NA	NA	LOC113712309
LOC113741464	NA	NA	NA	LOC113722789	LOC113703890	NA	NA	NA	NA	LOC113693880	NA	NA	NA	NA	LOC113734084	NA	NA	NA	NA	LOC113694930	NA	NA	NA	LOC113703593
LOC113714426	NA	NA	NA	LOC113716965	LOC113731683	NA	NA	NA	NA	LOC113708922	NA	NA	NA	NA	LOC113719645	NA	NA	NA	NA	LOC113711035	NA	NA	NA	LOC113717148
LOC113736785	NA	NA	NA	LOC113691741	LOC113713574	NA	NA	NA	NA	LOC113696146	NA	NA	NA	NA	LOC113697741	NA	NA	NA	NA	LOC113702706	NA	NA	NA	LOC113734696
LOC113687762	NA	NA	NA	LOC113709438	LOC113706892	NA	NA	NA	NA	LOC113742127	NA	NA	NA	NA	LOC113688623	NA	NA	NA	NA	LOC113713179	NA	NA	NA	LOC113731264
LOC113703483	NA	NA	NA	LOC113696193	LOC113714402	NA	NA	NA	NA	LOC113724782	NA	NA	NA	NA	LOC113706898	NA	NA	NA	NA	LOC113716772	NA	NA	NA	LOC113724592
LOC113705347	NA	NA	NA	LOC113692734	LOC113698988	NA	NA	NA	NA	LOC113720553	NA	NA	NA	NA	LOC113716772	NA	NA	NA	NA	LOC113688932	NA	NA	NA	NA
LOC113712454	NA	NA	NA	LOC113697552	LOC113693625	NA	NA	NA	NA	LOC113699399	NA	NA	NA	NA	LOC113707268	NA	NA	NA	NA	LOC113701629	NA	NA	NA	NA
LOC113731582	NA	NA	NA	LOC113742106	LOC113732371	NA	NA	NA	NA	LOC113714632	NA	NA	NA	NA	LOC113715079	NA	NA	NA	NA	LOC113715079	NA	NA	NA	NA
LOC113734465	NA	NA	NA	LOC113732285	LOC113743332	NA	NA	NA	NA	LOC113701470	NA	NA	NA	NA	LOC113734182	NA	NA	NA	NA	LOC113691358	NA	NA	NA	NA
LOC113732444	NA	NA	NA	LOC113702088	LOC113734698	NA	NA	NA	NA	LOC113726128	NA	NA	NA	NA	LOC113717969	NA	NA	NA	NA	LOC113727507	NA	NA	NA	NA
LOC113718980	NA	NA	NA	LOC113706408	LOC113730775	NA	NA	NA	NA	LOC113697689	NA	NA	NA	NA	LOC113691358	NA	NA	NA	NA	LOC113702202	NA	NA	NA	NA
LOC113689994	NA	NA	NA	LOC113710436	LOC113742534	NA	NA	NA	NA	LOC113715537	NA	NA	NA	NA	LOC113704050	NA	NA	NA	NA	LOC113711819	NA	NA	NA	NA
LOC113715155	NA	NA	NA	LOC113697789	LOC113731220	NA	NA	NA	NA	LOC113692803	NA	NA	NA	NA	LOC113727507	NA	NA	NA	NA	LOC113738114	NA	NA	NA	NA
LOC113707064	NA	NA	NA	LOC113735169	LOC113730284	NA	NA	NA	NA	LOC113731182	NA	NA	NA	NA	LOC113688631	NA	NA	NA	NA	LOC113701456	NA	NA	NA	NA
LOC113731328	NA	NA	NA	LOC113711255	LOC113718730	NA	NA	NA	NA	LOC113717328	NA	NA	NA	NA	LOC113697186	NA	NA	NA	NA	LOC113696115	NA	NA	NA	NA
LOC113742921	NA	NA	NA	LOC113707875	LOC113717130	NA	NA	NA	NA	LOC113704192	NA	NA	NA	NA	LOC113693863	NA	NA	NA	NA	LOC113741494	NA	NA	NA	NA
LOC113695835	NA	NA	NA	LOC113695410	LOC113729820	NA	NA	NA	NA	LOC113743043	NA	NA	NA	NA	LOC113738114	NA	NA	NA	NA	LOC113702233	NA	NA	NA	NA
LOC113696039	NA	NA	NA	LOC113708139	LOC113734897	NA	NA	NA	NA	LOC113693955	NA	NA	NA	NA	LOC113696115	NA	NA	NA	NA	LOC113711811	NA	NA	NA	NA
LOC113717263	NA	NA	NA	LOC113734786	LOC113715221	NA	NA	NA	NA	LOC113694033	NA	NA	NA	NA	LOC113741494	NA	NA	NA	NA	LOC113688226	NA	NA	NA	NA
LOC113731252	NA	NA	NA	LOC113728112	LOC113739843	NA	NA	NA	NA	LOC113712675	NA	NA	NA	NA	LOC113707057	NA	NA	NA	NA	LOC113727963	NA	NA	NA	NA
LOC113704336	NA	NA	NA	LOC113730524	LOC113705669	NA	NA	NA	NA	LOC113707234	NA	NA	NA	NA	LOC113711811	NA	NA	NA	NA	LOC113741493	NA	NA	NA	NA
LOC113698102	NA	NA	NA	LOC113732787	LOC113690529	NA	NA	NA	NA	LOC113703890	NA	NA	NA	NA	LOC113713222	NA	NA	NA	NA	LOC113697572	NA	NA	NA	NA
LOC113687918	NA	NA	NA	LOC113735028	LOC113698587	NA	NA	NA	NA	LOC113742434	NA	NA	NA	NA	LOC113727847	NA	NA	NA	NA	LOC113693783	NA	NA	NA	NA
LOC113732843	NA	NA	NA	LOC113733356	LOC113703635	NA	NA	NA	NA	LOC113731946	NA	NA	NA	NA	LOC113731670	NA	NA	NA	NA	LOC113691461	NA	NA	NA	NA
LOC113743496	NA	NA	NA	LOC113694100	LOC113733097	NA	NA	NA	NA	LOC113731683	NA	NA	NA	NA	LOC113740018	NA	NA	NA	NA	LOC113712889	NA	NA	NA	NA
LOC113688619	NA	NA	NA	LOC113735212	LOC113725205	NA	NA	NA	NA	LOC113714402	NA	NA	NA	NA	LOC113707424	NA	NA	NA	NA	LOC113736349	NA	NA	NA	NA
LOC113695243	NA	NA	NA	LOC113730227	LOC113727462	NA	NA	NA	NA	LOC113699047	NA	NA	NA	NA	LOC113716801	NA	NA	NA	NA	LOC113725676	NA	NA	NA	NA
LOC113726704	NA	NA	NA	LOC113739696	LOC113706916	NA	NA	NA	NA	LOC113698988	NA	NA	NA	NA	LOC113691461	NA	NA	NA	NA	LOC113727924	NA	NA	NA	NA
LOC113728139	NA	NA	NA	LOC113693727	LOC113718359	NA	NA	NA	NA	LOC113696095	NA	NA	NA	NA	LOC113707235	NA	NA	NA	NA	LOC113743394	NA	NA	NA	NA
LOC113726511	NA	NA	NA	LOC113700401	LOC113707837	NA	NA	NA	NA	LOC113743332	NA	NA	NA	NA	LOC113712889	NA	NA	NA	NA	LOC113712852	NA	NA	NA	NA
LOC113688600	NA	NA	NA	LOC113699063	LOC113699445	NA	NA	NA	NA	LOC113730775	NA	NA	NA	NA	LOC113711908	NA	NA	NA	NA	LOC113738148	NA	NA	NA	NA
LOC113713641	NA	NA	NA	LOC113740402	LOC113690724	NA	NA	NA	NA	LOC113725260	NA	NA	NA	NA	LOC113727924	NA	NA	NA	NA	LOC113731126	NA	NA	NA	NA
LOC113712746	NA	NA	NA	LOC113702687	LOC113736676	NA	NA	NA	NA	LOC113731220	NA	NA	NA	NA	LOC113712000	NA	NA	NA	NA	LOC113725623	NA	NA	NA	NA
LOC113698758	NA	NA	NA	LOC113730598	LOC113712909	NA	NA	NA	NA	LOC113722765	NA	NA	NA	NA	LOC113738148	NA	NA	NA	NA	LOC113714458	NA	NA	NA	NA
LOC113690239	NA	NA	NA	LOC113726463	LOC113739872	NA	NA	NA	NA	LOC113707148	NA	NA	NA	NA	LOC113731126	NA	NA	NA	NA	LOC113725332	NA	NA	NA	NA
LOC113708933	NA	NA	NA	LOC113740306	LOC113713078	NA	NA	NA	NA	LOC113717825	NA	NA	NA	NA	LOC113706674	NA	NA	NA	NA	LOC113697748	NA	NA	NA	NA
LOC113717855	NA	NA	NA	LOC113697742	LOC113742913	NA	NA	NA	NA	LOC113739843	NA	NA	NA	NA	LOC113714458	NA	NA	NA	NA	LOC113725345	NA	NA	NA	NA
LOC113712394	NA	NA	NA	LOC113733711	LOC113710495	NA	NA	NA	NA	LOC113701197	NA	NA	NA	NA	LOC113725345	NA	NA	NA	NA	LOC113695780	NA	NA	NA	NA
LOC113700168	NA	NA	NA	LOC113700440	LOC113694329	NA	NA	NA	NA	LOC113699101	NA	NA	NA	NA	LOC113695780	NA	NA	NA	NA	LOC113691985	NA	NA	NA	NA
LOC113709290	NA	NA	NA	LOC113738822	LOC113739838	NA	NA	NA	NA	LOC113694811	NA	NA	NA	NA	LOC113691985	NA	NA	NA	NA	LOC113692468	NA	NA	NA	NA
LOC113726398	NA	NA	NA	LOC113692678	LOC113697231	NA	NA	NA	NA	LOC113703454	NA	NA	NA	NA	LOC113710801	NA	NA	NA	NA	LOC113728094	NA	NA	NA	NA
LOC113741688	NA	NA	NA	LOC113709717	LOC113688578	NA	NA	NA	NA	LOC113712833	NA	NA	NA	NA	LOC113713017	NA	NA	NA	NA	LOC113734997	NA	NA	NA	NA
LOC113691707	NA	NA	NA	LOC113688248	LOC113690689	NA	NA	NA	NA	LOC113698587	NA	NA	NA	NA	LOC113742604	NA	NA	NA	NA	LOC113696154	NA	NA	NA	NA
LOC113739780	NA	NA	NA	LOC113696228	LOC113738058	NA	NA	NA	NA	LOC113694034	NA	NA	NA	NA	LOC113736411	NA	NA	NA	NA	LOC113700970	NA	NA	NA	NA
LOC113687930	NA	NA	NA	LOC113695212	LOC113739577	NA	NA	NA	NA	LOC113717835	NA	NA	NA	NA	LOC113696154	NA	NA	NA	NA	LOC113699355	NA	NA	NA	NA
LOC113702179	NA	NA	NA	LOC113694620	LOC113702443	NA	NA	NA	NA	LOC113707837	NA	NA	NA	NA	LOC113700970	NA	NA	NA	NA	LOC113711960	NA	NA	NA	NA
LOC113722896	NA	NA	NA	LOC113730061	LOC113701304	NA	NA	NA	NA	LOC113702143	NA	NA	NA	NA	LOC113711960	NA	NA	NA	NA	LOC113725741	NA	NA	NA	NA
LOC113696063	NA	NA	NA	LOC113708901	LOC113714528	NA	NA	NA	NA	LOC113696188	NA	NA	NA	NA	LOC113727460	NA	NA	NA	NA	LOC113727460	NA	NA	NA	NA
LOC113710207	NA	NA	NA	LOC113688052	LOC113712659	NA	NA	NA	NA	LOC113699445	NA	NA	NA	NA	LOC113740437	NA	NA	NA	NA	LOC113693866	NA	NA	NA	NA
LOC113719137	NA	NA	NA	LOC113732236	LOC113707352	NA	NA	NA	NA	LOC113712909	NA	NA	NA	NA	LOC113704132	NA	NA	NA	NA	LOC113704132	NA	NA	NA	NA
LOC113727321	NA	NA	NA	LOC113690517	LOC113731922	NA	NA	NA	NA	LOC113713078	NA	NA	NA	NA	LOC113691778	NA	NA	NA	NA	LOC113691778	NA	NA	NA	NA
LOC113699377	NA	NA	NA	LOC113719066	LOC113712385	NA	NA	NA	NA	LOC113710495	NA	NA	NA	NA	LOC113704303	NA	NA	NA	NA	LOC113704303	NA	NA	NA	NA
LOC113694823	NA	NA	NA	LOC113709465	LOC113714671	NA	NA	NA	NA	LOC113694329	NA	NA	NA	NA	LOC113701153	NA	NA	NA	NA	LOC113697432	NA	NA	NA	NA
LOC113736640	NA	NA	NA	LOC113718958	LOC113703929	NA	NA	NA	NA	LOC113703899	NA	NA	NA	NA	LOC113703342	NA	NA	NA	NA	LOC113708895	NA	NA	NA	NA
LOC113704983	NA	NA	NA	LOC113709115	LOC113701332	NA	NA	NA	NA	LOC113697231	NA	NA	NA	NA	LOC113730476	NA	NA	NA	NA	LOC113699143	NA	NA	NA	NA
LOC113727425	NA	NA	NA	LOC113710194	LOC113735949	NA	NA	NA	NA	LOC113734934	NA	NA	NA	NA	LOC113698698	NA	NA	NA	NA	LOC113697054	NA	NA	NA	NA
LOC113714648	NA	NA	NA	LOC113741423	LOC113707786	NA	NA	NA	NA	LOC113738058	NA	NA	NA	NA	LOC113742714	NA	NA	NA	NA	LOC113711696	NA	NA	NA	NA
LOC113689912	NA	NA	NA	LOC113728161	LOC113713063	NA	NA	NA	NA	LOC113687651	NA	NA	NA	NA	LOC113707483	NA	NA	NA	NA	LOC113730476	NA	NA	NA	NA
LOC113706828	NA	NA	NA	LOC113731842	LOC113724780	NA	NA	NA	NA	LOC113718634	NA	NA	NA	NA	LOC113709230	NA	NA	NA	NA	LOC113710962	NA	NA	NA	NA
LOC113708757	NA	NA	NA	LOC113719589	LOC113740384	NA	NA	NA	NA	LOC113702443	NA	NA	NA	NA	LOC113689556	NA	NA	NA	NA	LOC113698698	NA	NA	NA	NA
LOC113713833	NA	NA	NA	LOC113727590	LOC113741403	NA	NA	NA	NA	LOC113710172	NA	NA	NA	NA	LOC113703441	NA	NA	NA	NA	LOC113742714	NA	NA	NA	NA
LOC113733909	NA	NA	NA	LOC113702440	LOC113699951	NA	NA	NA	NA	LOC113695294	NA	NA	NA	NA	LOC113696242	NA	NA	NA	NA	LOC113712354	NA	NA	NA	NA
LOC113692755	NA	NA	NA	LOC113731925	LOC113736472	NA	NA	NA	NA	LOC113692666	NA	NA	NA	NA	LOC113699406	NA	NA	NA	NA	LOC113709230	NA	NA	NA	NA
LOC113712479	NA	NA	NA	LOC113725054	LOC113730839	NA	NA	NA	NA	LOC113714671	NA	NA	NA	NA	LOC113702412	NA	NA	NA	NA	LOC113688773	NA	NA	NA	NA
LOC113726462	NA	NA	NA	LOC113738008	LOC113730511	NA	NA	NA	NA	LOC113723024	NA	NA	NA	NA	LOC113710338	NA	NA	NA	NA	LOC113689556	NA	NA	NA	NA
LOC113724790	NA	NA	NA	LOC113733118	LOC113727284	NA	NA	NA	NA	LOC113743184	NA	NA	NA	NA	LOC113741718	NA	NA	NA	NA	LOC113690768	NA	NA	NA	NA
LOC113712382	NA	NA	NA	LOC113725173	LOC113727279	NA	NA	NA	NA	LOC113730002	NA	NA	NA	NA	LOC113742562	NA	NA	NA	NA	LOC113702412	NA	NA	NA	NA
LOC113732796	NA	NA	NA	LOC113692698	LOC113713006	NA	NA	NA	NA	LOC113738365	NA	NA	NA	NA	LOC113729147	NA	NA	NA	NA	LOC113706730	NA	NA	NA	NA
LOC113705982	NA	NA	NA	LOC113696190	LOC113732732	NA	NA	NA	NA	LOC113740384	NA	NA	NA	NA	LOC113716810	NA	NA	NA	NA	LOC113741718	NA	NA	NA	NA
LOC113710450	NA	NA	NA	LOC113706571	LOC113693609	NA	NA	NA	NA	LOC113743459	NA	NA	NA	NA	LOC113700142	NA	NA	NA	NA	LOC113711768	NA	NA	NA	NA
LOC113692871	NA	NA	NA	LOC113703114	LOC113727021	NA	NA	NA	NA	LOC113736552	NA	NA	NA	NA	LOC113692815	NA	NA	NA	NA	LOC113732860	NA	NA	NA	NA
LOC113692733	NA	NA	NA	LOC113692163	LOC113701899	NA	NA	NA	NA	LOC113727284	NA	NA	NA	NA	LOC113712187	NA	NA	NA	NA	LOC113729147	NA	NA	NA	NA
LOC113742795	NA	NA	NA	LOC113738160	LOC113728129	NA	NA	NA	NA	LOC113698238	NA	NA	NA	NA	LOC113689134	NA	NA	NA	NA	LOC113726836	NA	NA	NA	NA
LOC113713234	NA	NA	NA	LOC113711005	LOC113690713	NA	NA	NA	NA	LOC113697444	NA	NA	NA	NA	LOC113710250	NA	NA	NA	NA	LOC113707166	NA	NA	NA	NA
LOC113734067	NA	NA	NA	LOC113715095	LOC113723008	NA	NA	NA	NA	LOC113698344	NA	NA	NA	NA	LOC113705552	NA	NA	NA	NA	LOC113726882	NA	NA	NA	NA
LOC113726967	NA	NA	NA	LOC113736783	LOC113736597	NA	NA	NA	NA	LOC113698639	NA	NA	NA	NA	LOC113715503	NA	NA	NA	NA	LOC113699624	NA	NA	NA	NA
LOC113694477	NA	NA	NA	LOC113709652	LOC113724775	NA	NA	NA	NA	LOC113708070	NA	NA	NA	NA	LOC113701232	NA	NA	NA	NA	LOC113703629	NA	NA	NA	NA
LOC113742650	NA	NA	NA	LOC113731203	LOC113690418	NA	NA	NA	NA	LOC113728129	NA	NA	NA	NA	LOC113699253	NA	NA	NA	NA	LOC113710919	NA	NA	NA	NA
LOC113716746	NA	NA	NA	LOC113694891	LOC113690982	NA	NA	NA	NA	LOC113730371	NA	NA	NA	NA	LOC113696715	NA	NA	NA	NA	LOC113701232	NA	NA	NA	NA
LOC113743773	NA	NA	NA	LOC113701837	LOC113708845	NA	NA	NA	NA	LOC113736597	NA	NA	NA	NA	LOC113697273	NA	NA	NA	NA	LOC113743353	NA	NA	NA	NA
LOC113706235	NA	NA	NA	LOC113702902	LOC113710171	NA	NA	NA	NA	LOC113703548	NA	NA	NA	NA	LOC113695980	NA	NA	NA	NA	LOC113712314	NA	NA	NA	NA
LOC113738785	NA	NA	NA	LOC113699380	LOC113728008	NA	NA	NA	NA	LOC113724775	NA	NA	NA	NA	LOC113705608	NA	NA	NA	NA	LOC113690971	NA	NA	NA	NA
LOC113694257	NA	NA	NA	LOC113736567	LOC113698066	NA	NA	NA	NA	LOC113690982	NA	NA	NA	NA	LOC113712314	NA	NA	NA	NA	LOC113687793	NA	NA	NA	NA
LOC113738250	NA	NA	NA	LOC113730979	LOC113703964	NA	NA	NA	NA	LOC113708845	NA	NA	NA	NA	LOC113695889	NA	NA	NA	NA	LOC113695889	NA	NA	NA	NA
LOC113740192	NA	NA	NA	LOC113714381	LOC113707476	NA	NA	NA	NA	LOC113708520	NA	NA	NA	NA	LOC113714863	NA	NA	NA	NA	LOC113715778	NA	NA	NA	NA
LOC113713181	NA	NA	NA	LOC113742060	LOC113734716	NA	NA	NA	NA	LOC113710171	NA	NA	NA	NA	LOC113715778	NA	NA	NA	NA	LOC113709702	NA	NA	NA	NA
LOC113704371	NA	NA	NA	LOC113725466	LOC113730953	NA	NA	NA	NA	LOC113727690	NA	NA	NA	NA	LOC113706822	NA	NA	NA	NA	LOC113725575	NA	NA	NA	NA
LOC113706304	NA	NA	NA	LOC113690214	LOC113704167	NA	NA	NA	NA	LOC113736248	NA	NA	NA	NA	LOC113711015	NA	NA	NA	NA	LOC113743656	NA	NA	NA	NA
LOC113712950	NA	NA	NA	LOC113705222	LOC113727132	NA	NA	NA	NA	LOC113735790	NA	NA	NA	NA	LOC113715169	NA	NA	NA	NA	LOC113715169	NA	NA	NA	NA
LOC113696259	NA	NA	NA	LOC113738092	LOC113703991	NA	NA	NA	NA	LOC113742889	NA	NA	NA	NA	LOC113706399	NA	NA	NA	NA	LOC113736201	NA	NA	NA	NA
LOC113691009	NA	NA	NA	LOC113734473	LOC113693311	NA	NA	NA	NA	LOC113703964	NA	NA	NA	NA	LOC113694966	NA	NA	NA	NA	LOC113706399	NA	NA	NA	NA
LOC113701809	NA	NA	NA	LOC113717148	LOC113707935	NA	NA	NA	NA	LOC113707476	NA	NA	NA	NA	LOC113718914	NA	NA	NA	NA	LOC113740421	NA	NA	NA	NA
LOC113699100	NA	NA	NA	LOC113726594	LOC113737990	NA	NA	NA	NA	LOC113730953	NA	NA	NA	NA	LOC113728148	NA	NA	NA	NA	LOC113718914	NA	NA	NA	NA
LOC113743662	NA	NA	NA	NA	LOC113704365	NA	NA	NA	NA	LOC113704167	NA	NA	NA	NA	LOC113688968	NA	NA	NA	NA	LOC113702172	NA	NA	NA	NA
LOC113690393	NA	NA	NA	NA	LOC113743298	NA	NA	NA	NA	LOC113703991	NA	NA	NA	NA	LOC113699304	NA	NA	NA	NA	LOC113726658	NA	NA	NA	NA
LOC113710295	NA	NA	NA	NA	LOC113701832	NA	NA	NA	NA	LOC113736582	NA	NA	NA	NA	LOC113716738	NA	NA	NA	NA	LOC113701095	NA	NA	NA	NA
LOC113743390	NA	NA	NA	NA	LOC113742772	NA	NA	NA	NA	LOC113705663	NA	NA	NA	NA	LOC113740431	NA	NA	NA	NA	LOC113730784	NA	NA	NA	NA
LOC113732899	NA	NA	NA	NA	LOC113688273	NA	NA	NA	NA	LOC113712695	NA	NA	NA	NA	LOC113704175	NA	NA	NA	NA	LOC113726579	NA	NA	NA	NA
LOC113730671	NA	NA	NA	NA	LOC113727384	NA	NA	NA	NA	LOC113707935	NA	NA	NA	NA	LOC113719248	NA	NA	NA	NA	LOC113727263	NA	NA	NA	NA
LOC113703660	NA	NA	NA	NA	LOC113727877	NA	NA	NA	NA	LOC113732805	NA	NA	NA	NA	LOC113688330	NA	NA	NA	NA	LOC113690584	NA	NA	NA	NA
LOC113729833	NA	NA	NA	NA	LOC113707161	NA	NA	NA	NA	LOC113713371	NA	NA	NA	NA	LOC113690123	NA	NA	NA	NA	LOC113701240	NA	NA	NA	NA
LOC113717214	NA	NA	NA	NA	LOC113717657	NA	NA	NA	NA	LOC113741326	NA	NA	NA	NA	LOC113695663	NA	NA	NA	NA	LOC113688461	NA	NA	NA	NA
LOC113738025	NA	NA	NA	NA	LOC113716981	NA	NA	NA	NA	LOC113716956	NA	NA	NA	NA	LOC113741190	NA	NA	NA	NA	LOC113712239	NA	NA	NA	NA
LOC113712253	NA	NA	NA	NA	LOC113706944	NA	NA	NA	NA	LOC113743298	NA	NA	NA	NA	LOC113711982	NA	NA	NA	NA	LOC113692866	NA	NA	NA	NA
LOC113734764	NA	NA	NA	NA	LOC113710227	NA	NA	NA	NA	LOC113731685	NA	NA	NA	NA	LOC113690584	NA	NA	NA	NA	LOC113734405	NA	NA	NA	NA
LOC113710213	NA	NA	NA	NA	LOC113718909	NA	NA	NA	NA	LOC113715659	NA	NA	NA	NA	LOC113730466	NA	NA	NA	NA	LOC113739966	NA	NA	NA	NA
LOC113693925	NA	NA	NA	NA	LOC113688218	NA	NA	NA	NA	LOC113699536	NA	NA	NA	NA	LOC113710578	NA	NA	NA	NA	LOC113742979	NA	NA	NA	NA
LOC113693747	NA	NA	NA	NA	LOC113691388	NA	NA	NA	NA	LOC113693724	NA	NA	NA	NA	LOC113717608	NA	NA	NA	NA	LOC113725849	NA	NA	NA	NA
LOC113709120	NA	NA	NA	NA	LOC113694872	NA	NA	NA	NA	LOC113690018	NA	NA	NA	NA	LOC113698806	NA	NA	NA	NA	LOC113698806	NA	NA	NA	NA
LOC113697588	NA	NA	NA	NA	LOC113742295	NA	NA	NA	NA	LOC113701832	NA	NA	NA	NA	LOC113725633	NA	NA	NA	NA	LOC113716941	NA	NA	NA	NA
LOC113693877	NA	NA	NA	NA	LOC113729892	NA	NA	NA	NA	LOC113688273	NA	NA	NA	NA	LOC113714506	NA	NA	NA	NA	LOC113725633	NA	NA	NA	NA
LOC113696143	NA	NA	NA	NA	LOC113734402	NA	NA	NA	NA	LOC113725136	NA	NA	NA	NA	LOC113742316	NA	NA	NA	NA	LOC113704182	NA	NA	NA	NA
LOC113725021	NA	NA	NA	NA	LOC113727692	NA	NA	NA	NA	LOC113694269	NA	NA	NA	NA	LOC113730930	NA	NA	NA	NA	LOC113697953	NA	NA	NA	NA
LOC113694239	NA	NA	NA	NA	LOC113697371	NA	NA	NA	NA	LOC113717657	NA	NA	NA	NA	LOC113705324	NA	NA	NA	NA	LOC113697030	NA	NA	NA	NA
LOC113702239	NA	NA	NA	NA	LOC113734236	NA	NA	NA	NA	LOC113696175	NA	NA	NA	NA	LOC113706162	NA	NA	NA	NA	LOC113713468	NA	NA	NA	NA
LOC113693652	NA	NA	NA	NA	LOC113712571	NA	NA	NA	NA	LOC113716981	NA	NA	NA	NA	LOC113692839	NA	NA	NA	NA	LOC113725601	NA	NA	NA	NA
LOC113689779	NA	NA	NA	NA	LOC113695021	NA	NA	NA	NA	LOC113694253	NA	NA	NA	NA	LOC113688183	NA	NA	NA	NA	LOC113730930	NA	NA	NA	NA
LOC113716813	NA	NA	NA	NA	LOC113726047	NA	NA	NA	NA	LOC113717425	NA	NA	NA	NA	LOC113720656	NA	NA	NA	NA	LOC113734739	NA	NA	NA	NA
LOC113739709	NA	NA	NA	NA	LOC113698656	NA	NA	NA	NA	LOC113694243	NA	NA	NA	NA	LOC113738565	NA	NA	NA	NA	LOC113688183	NA	NA	NA	NA
LOC113688180	NA	NA	NA	NA	LOC113701421	NA	NA	NA	NA	LOC113688218	NA	NA	NA	NA	LOC113707018	NA	NA	NA	NA	LOC113726732	NA	NA	NA	NA
LOC113732102	NA	NA	NA	NA	LOC113730879	NA	NA	NA	NA	LOC113732714	NA	NA	NA	NA	LOC113693943	NA	NA	NA	NA	LOC113738565	NA	NA	NA	NA
LOC113734243	NA	NA	NA	NA	LOC113704403	NA	NA	NA	NA	LOC113734402	NA	NA	NA	NA	LOC113712190	NA	NA	NA	NA	LOC113741568	NA	NA	NA	NA
LOC113702116	NA	NA	NA	NA	LOC113693923	NA	NA	NA	NA	LOC113727692	NA	NA	NA	NA	LOC113693880	NA	NA	NA	NA	LOC113714643	NA	NA	NA	NA
LOC113728150	NA	NA	NA	NA	LOC113715639	NA	NA	NA	NA	LOC113697371	NA	NA	NA	NA	LOC113723001	NA	NA	NA	NA	LOC113693880	NA	NA	NA	NA
LOC113709351	NA	NA	NA	NA	LOC113701175	NA	NA	NA	NA	LOC113693995	NA	NA	NA	NA	LOC113736266	NA	NA	NA	NA	LOC113723001	NA	NA	NA	NA
LOC113698326	NA	NA	NA	NA	LOC113699174	NA	NA	NA	NA	LOC113739365	NA	NA	NA	NA	LOC113727103	NA	NA	NA	NA	LOC113708922	NA	NA	NA	NA
LOC113727610	NA	NA	NA	NA	LOC113702024	NA	NA	NA	NA	LOC113734236	NA	NA	NA	NA	LOC113688229	NA	NA	NA	NA	LOC113726226	NA	NA	NA	NA
LOC113731718	NA	NA	NA	NA	LOC113713822	NA	NA	NA	NA	LOC113714469	NA	NA	NA	NA	LOC113696146	NA	NA	NA	NA	LOC113727103	NA	NA	NA	NA
LOC113728747	NA	NA	NA	NA	LOC113694613	NA	NA	NA	NA	LOC113695021	NA	NA	NA	NA	LOC113742127	NA	NA	NA	NA	LOC113704349	NA	NA	NA	NA
LOC113693645	NA	NA	NA	NA	LOC113700127	NA	NA	NA	NA	LOC113698656	NA	NA	NA	NA	LOC113697172	NA	NA	NA	NA	LOC113742127	NA	NA	NA	NA
LOC113695684	NA	NA	NA	NA	LOC113714934	NA	NA	NA	NA	LOC113688511	NA	NA	NA	NA	LOC113695065	NA	NA	NA	NA	LOC113724782	NA	NA	NA	NA
LOC113706697	NA	NA	NA	NA	LOC113718330	NA	NA	NA	NA	LOC113721955	NA	NA	NA	NA	LOC113701340	NA	NA	NA	NA	LOC113695065	NA	NA	NA	NA
LOC113741698	NA	NA	NA	NA	LOC113742725	NA	NA	NA	NA	LOC113715639	NA	NA	NA	NA	LOC113736410	NA	NA	NA	NA	LOC113720553	NA	NA	NA	NA
LOC113742235	NA	NA	NA	NA	LOC113698811	NA	NA	NA	NA	LOC113714935	NA	NA	NA	NA	LOC113714632	NA	NA	NA	NA	LOC113706868	NA	NA	NA	NA
LOC113712407	NA	NA	NA	NA	LOC113734761	NA	NA	NA	NA	LOC113700349	NA	NA	NA	NA	LOC113731487	NA	NA	NA	NA	LOC113739573	NA	NA	NA	NA
LOC113692821	NA	NA	NA	NA	LOC113701333	NA	NA	NA	NA	LOC113702024	NA	NA	NA	NA	LOC113701470	NA	NA	NA	NA	LOC113701470	NA	NA	NA	NA
LOC113717158	NA	NA	NA	NA	LOC113692988	NA	NA	NA	NA	LOC113713822	NA	NA	NA	NA	LOC113690503	NA	NA	NA	NA	LOC113731182	NA	NA	NA	NA
LOC113698591	NA	NA	NA	NA	LOC113695972	NA	NA	NA	NA	LOC113712832	NA	NA	NA	NA	LOC113726115	NA	NA	NA	NA	LOC113717328	NA	NA	NA	NA
LOC113699201	NA	NA	NA	NA	LOC113694722	NA	NA	NA	NA	LOC113700127	NA	NA	NA	NA	LOC113731182	NA	NA	NA	NA	LOC113743049	NA	NA	NA	NA
LOC113736655	NA	NA	NA	NA	LOC113727018	NA	NA	NA	NA	LOC113715709	NA	NA	NA	NA	LOC113726560	NA	NA	NA	NA	LOC113700033	NA	NA	NA	NA
LOC113708794	NA	NA	NA	NA	LOC113742787	NA	NA	NA	NA	LOC113739781	NA	NA	NA	NA	LOC113743049	NA	NA	NA	NA	LOC113703042	NA	NA	NA	NA
LOC113690219	NA	NA	NA	NA	LOC113701908	NA	NA	NA	NA	LOC113726048	NA	NA	NA	NA	LOC113697361	NA	NA	NA	NA	LOC113710710	NA	NA	NA	NA
LOC113732562	NA	NA	NA	NA	LOC113702007	NA	NA	NA	NA	LOC113695972	NA	NA	NA	NA	LOC113710710	NA	NA	NA	NA	LOC113713534	NA	NA	NA	NA
LOC113712361	NA	NA	NA	NA	LOC113707656	NA	NA	NA	NA	LOC113723040	NA	NA	NA	NA	LOC113730470	NA	NA	NA	NA	LOC113730470	NA	NA	NA	NA
LOC113743611	NA	NA	NA	NA	LOC113716311	NA	NA	NA	NA	LOC113694883	NA	NA	NA	NA	LOC113732765	NA	NA	NA	NA	LOC113704192	NA	NA	NA	NA
LOC113737798	NA	NA	NA	NA	LOC113726477	NA	NA	NA	NA	LOC113702742	NA	NA	NA	NA	LOC113704192	NA	NA	NA	NA	LOC113693955	NA	NA	NA	NA
LOC113688623	NA	NA	NA	NA	LOC113690726	NA	NA	NA	NA	LOC113701908	NA	NA	NA	NA	LOC113727988	NA	NA	NA	NA	LOC113712675	NA	NA	NA	NA
LOC113719027	NA	NA	NA	NA	LOC113731983	NA	NA	NA	NA	LOC113707656	NA	NA	NA	NA	LOC113743043	NA	NA	NA	NA	LOC113727511	NA	NA	NA	NA
LOC113702706	NA	NA	NA	NA	LOC113706528	NA	NA	NA	NA	LOC113696767	NA	NA	NA	NA	LOC113712675	NA	NA	NA	NA	LOC113707234	NA	NA	NA	NA
LOC113712419	NA	NA	NA	NA	LOC113740589	NA	NA	NA	NA	LOC113704232	NA	NA	NA	NA	LOC113727511	NA	NA	NA	NA	LOC113731072	NA	NA	NA	NA
LOC113706991	NA	NA	NA	NA	LOC113732150	NA	NA	NA	NA	LOC113690726	NA	NA	NA	NA	LOC113712029	NA	NA	NA	NA	LOC113693957	NA	NA	NA	NA
LOC113719347	NA	NA	NA	NA	LOC113731798	NA	NA	NA	NA	LOC113731983	NA	NA	NA	NA	LOC113707234	NA	NA	NA	NA	LOC113706810	NA	NA	NA	NA
LOC113724743	NA	NA	NA	NA	LOC113743370	NA	NA	NA	NA	LOC113706864	NA	NA	NA	NA	LOC113731072	NA	NA	NA	NA	LOC113707159	NA	NA	NA	NA
LOC113735245	NA	NA	NA	NA	LOC113702914	NA	NA	NA	NA	LOC113712269	NA	NA	NA	NA	LOC113688897	NA	NA	NA	NA	LOC113703891	NA	NA	NA	NA
LOC113737049	NA	NA	NA	NA	LOC113694837	NA	NA	NA	NA	LOC113731798	NA	NA	NA	NA	LOC113732100	NA	NA	NA	NA	LOC113695631	NA	NA	NA	NA
LOC113701629	NA	NA	NA	NA	LOC113692629	NA	NA	NA	NA	LOC113743370	NA	NA	NA	NA	LOC113726073	NA	NA	NA	NA	LOC113688897	NA	NA	NA	NA
LOC113715079	NA	NA	NA	NA	LOC113688210	NA	NA	NA	NA	LOC113702963	NA	NA	NA	NA	LOC113735216	NA	NA	NA	NA	LOC113735216	NA	NA	NA	NA
LOC113734182	NA	NA	NA	NA	LOC113699006	NA	NA	NA	NA	LOC113725992	NA	NA	NA	NA	LOC113730656	NA	NA	NA	NA	LOC113730656	NA	NA	NA	NA
LOC113704050	NA	NA	NA	NA	LOC113700098	NA	NA	NA	NA	LOC113696048	NA	NA	NA	NA	LOC113692541	NA	NA	NA	NA	LOC113731683	NA	NA	NA	NA
LOC113727507	NA	NA	NA	NA	LOC113697234	NA	NA	NA	NA	LOC113701662	NA	NA	NA	NA	LOC113714402	NA	NA	NA	NA	LOC113706892	NA	NA	NA	NA
LOC113702202	NA	NA	NA	NA	LOC113705251	NA	NA	NA	NA	LOC113688908	NA	NA	NA	NA	LOC113726799	NA	NA	NA	NA	LOC113692541	NA	NA	NA	NA
LOC113690494	NA	NA	NA	NA	LOC113742785	NA	NA	NA	NA	LOC113699006	NA	NA	NA	NA	LOC113699047	NA	NA	NA	NA	LOC113714402	NA	NA	NA	NA
LOC113697186	NA	NA	NA	NA	LOC113690407	NA	NA	NA	NA	LOC113716845	NA	NA	NA	NA	LOC113696095	NA	NA	NA	NA	LOC113726799	NA	NA	NA	NA
LOC113701456	NA	NA	NA	NA	LOC113739558	NA	NA	NA	NA	LOC113700022	NA	NA	NA	NA	LOC113712324	NA	NA	NA	NA	LOC113731847	NA	NA	NA	NA
LOC113694549	NA	NA	NA	NA	LOC113734976	NA	NA	NA	NA	LOC113700098	NA	NA	NA	NA	LOC113730775	NA	NA	NA	NA	LOC113698988	NA	NA	NA	NA
LOC113736352	NA	NA	NA	NA	LOC113693624	NA	NA	NA	NA	LOC113691875	NA	NA	NA	NA	LOC113742534	NA	NA	NA	NA	LOC113696095	NA	NA	NA	NA
LOC113702810	NA	NA	NA	NA	LOC113697889	NA	NA	NA	NA	LOC113697234	NA	NA	NA	NA	LOC113725260	NA	NA	NA	NA	LOC113743332	NA	NA	NA	NA
LOC113740018	NA	NA	NA	NA	LOC113703601	NA	NA	NA	NA	LOC113703465	NA	NA	NA	NA	LOC113687818	NA	NA	NA	NA	LOC113712324	NA	NA	NA	NA
LOC113701872	NA	NA	NA	NA	LOC113734503	NA	NA	NA	NA	LOC113706913	NA	NA	NA	NA	LOC113731220	NA	NA	NA	NA	LOC113687818	NA	NA	NA	NA
LOC113718828	NA	NA	NA	NA	LOC113719210	NA	NA	NA	NA	LOC113719516	NA	NA	NA	NA	LOC113722765	NA	NA	NA	NA	LOC113736800	NA	NA	NA	NA
LOC113727963	NA	NA	NA	NA	LOC113713303	NA	NA	NA	NA	LOC113697210	NA	NA	NA	NA	LOC113707148	NA	NA	NA	NA	LOC113713589	NA	NA	NA	NA
LOC113702223	NA	NA	NA	NA	LOC113713707	NA	NA	NA	NA	LOC113704198	NA	NA	NA	NA	LOC113730055	NA	NA	NA	NA	LOC113706895	NA	NA	NA	NA
LOC113707447	NA	NA	NA	NA	LOC113692768	NA	NA	NA	NA	LOC113727791	NA	NA	NA	NA	LOC113698865	NA	NA	NA	NA	LOC113688254	NA	NA	NA	NA
LOC113707424	NA	NA	NA	NA	LOC113708369	NA	NA	NA	NA	LOC113739558	NA	NA	NA	NA	LOC113725003	NA	NA	NA	NA	LOC113742878	NA	NA	NA	NA
LOC113691461	NA	NA	NA	NA	LOC113688098	NA	NA	NA	NA	LOC113734976	NA	NA	NA	NA	LOC113717825	NA	NA	NA	NA	LOC113688100	NA	NA	NA	NA
LOC113707235	NA	NA	NA	NA	LOC113725393	NA	NA	NA	NA	LOC113693624	NA	NA	NA	NA	LOC113706895	NA	NA	NA	NA	LOC113739843	NA	NA	NA	NA
LOC113736349	NA	NA	NA	NA	LOC113688550	NA	NA	NA	NA	LOC113697889	NA	NA	NA	NA	LOC113709480	NA	NA	NA	NA	LOC113701197	NA	NA	NA	NA
LOC113731600	NA	NA	NA	NA	LOC113711841	NA	NA	NA	NA	LOC113713707	NA	NA	NA	NA	LOC113734817	NA	NA	NA	NA	LOC113694235	NA	NA	NA	NA
LOC113727924	NA	NA	NA	NA	LOC113705841	NA	NA	NA	NA	LOC113708517	NA	NA	NA	NA	LOC113727194	NA	NA	NA	NA	LOC113699101	NA	NA	NA	NA
LOC113703452	NA	NA	NA	NA	LOC113709088	NA	NA	NA	NA	LOC113708369	NA	NA	NA	NA	LOC113695728	NA	NA	NA	NA	LOC113690529	NA	NA	NA	NA
LOC113739699	NA	NA	NA	NA	LOC113702264	NA	NA	NA	NA	LOC113688098	NA	NA	NA	NA	LOC113733832	NA	NA	NA	NA	LOC113710294	NA	NA	NA	NA
LOC113701521	NA	NA	NA	NA	LOC113710580	NA	NA	NA	NA	LOC113742351	NA	NA	NA	NA	LOC113696967	NA	NA	NA	NA	LOC113696072	NA	NA	NA	NA
LOC113708745	NA	NA	NA	NA	LOC113693620	NA	NA	NA	NA	LOC113701660	NA	NA	NA	NA	LOC113731738	NA	NA	NA	NA	LOC113715399	NA	NA	NA	NA
LOC113738148	NA	NA	NA	NA	LOC113691280	NA	NA	NA	NA	LOC113729822	NA	NA	NA	NA	LOC113699101	NA	NA	NA	NA	LOC113699075	NA	NA	NA	NA
LOC113706674	NA	NA	NA	NA	LOC113700435	NA	NA	NA	NA	LOC113736264	NA	NA	NA	NA	LOC113710294	NA	NA	NA	NA	LOC113703972	NA	NA	NA	NA
LOC113714458	NA	NA	NA	NA	LOC113736758	NA	NA	NA	NA	LOC113711841	NA	NA	NA	NA	LOC113703454	NA	NA	NA	NA	LOC113717835	NA	NA	NA	NA
LOC113693655	NA	NA	NA	NA	LOC113692833	NA	NA	NA	NA	LOC113710304	NA	NA	NA	NA	LOC113704054	NA	NA	NA	NA	LOC113725205	NA	NA	NA	NA
LOC113738210	NA	NA	NA	NA	LOC113691082	NA	NA	NA	NA	LOC113709088	NA	NA	NA	NA	LOC113712421	NA	NA	NA	NA	LOC113719472	NA	NA	NA	NA
LOC113695780	NA	NA	NA	NA	LOC113742158	NA	NA	NA	NA	LOC113702264	NA	NA	NA	NA	LOC113699075	NA	NA	NA	NA	LOC113706916	NA	NA	NA	NA
LOC113691985	NA	NA	NA	NA	LOC113717727	NA	NA	NA	NA	LOC113706314	NA	NA	NA	NA	LOC113711131	NA	NA	NA	NA	LOC113695850	NA	NA	NA	NA
LOC113692468	NA	NA	NA	NA	LOC113731883	NA	NA	NA	NA	LOC113710580	NA	NA	NA	NA	LOC113729263	NA	NA	NA	NA	LOC113712909	NA	NA	NA	NA
LOC113728094	NA	NA	NA	NA	LOC113724777	NA	NA	NA	NA	LOC113731142	NA	NA	NA	NA	LOC113710609	NA	NA	NA	NA	LOC113742783	NA	NA	NA	NA
LOC113711733	NA	NA	NA	NA	LOC113742744	NA	NA	NA	NA	LOC113692728	NA	NA	NA	NA	LOC113727462	NA	NA	NA	NA	LOC113697516	NA	NA	NA	NA
LOC113743544	NA	NA	NA	NA	LOC113691864	NA	NA	NA	NA	LOC113731855	NA	NA	NA	NA	LOC113706916	NA	NA	NA	NA	LOC113713078	NA	NA	NA	NA
LOC113697923	NA	NA	NA	NA	LOC113710453	NA	NA	NA	NA	LOC113719178	NA	NA	NA	NA	LOC113687872	NA	NA	NA	NA	LOC113742913	NA	NA	NA	NA
LOC113716899	NA	NA	NA	NA	LOC113718022	NA	NA	NA	NA	LOC113702176	NA	NA	NA	NA	LOC113712909	NA	NA	NA	NA	LOC113710495	NA	NA	NA	NA
LOC113696154	NA	NA	NA	NA	LOC113706818	NA	NA	NA	NA	LOC113712470	NA	NA	NA	NA	LOC113735152	NA	NA	NA	NA	LOC113704859	NA	NA	NA	NA
LOC113700970	NA	NA	NA	NA	LOC113725364	NA	NA	NA	NA	LOC113736758	NA	NA	NA	NA	LOC113742783	NA	NA	NA	NA	LOC113694329	NA	NA	NA	NA
LOC113739890	NA	NA	NA	NA	LOC113712500	NA	NA	NA	NA	LOC113733280	NA	NA	NA	NA	LOC113697516	NA	NA	NA	NA	LOC113739838	NA	NA	NA	NA
LOC113719601	NA	NA	NA	NA	LOC113693575	NA	NA	NA	NA	LOC113732579	NA	NA	NA	NA	LOC113742212	NA	NA	NA	NA	LOC113714811	NA	NA	NA	NA
LOC113716537	NA	NA	NA	NA	LOC113739816	NA	NA	NA	NA	LOC113735202	NA	NA	NA	NA	LOC113695245	NA	NA	NA	NA	LOC113711154	NA	NA	NA	NA
LOC113727460	NA	NA	NA	NA	LOC113719296	NA	NA	NA	NA	LOC113733891	NA	NA	NA	NA	LOC113694329	NA	NA	NA	NA	LOC113715413	NA	NA	NA	NA
LOC113740437	NA	NA	NA	NA	LOC113736867	NA	NA	NA	NA	LOC113691864	NA	NA	NA	NA	LOC113711154	NA	NA	NA	NA	LOC113739609	NA	NA	NA	NA
LOC113738127	NA	NA	NA	NA	LOC113725344	NA	NA	NA	NA	LOC113715125	NA	NA	NA	NA	LOC113697231	NA	NA	NA	NA	LOC113703488	NA	NA	NA	NA
LOC113702652	NA	NA	NA	NA	LOC113709486	NA	NA	NA	NA	LOC113726515	NA	NA	NA	NA	LOC113715413	NA	NA	NA	NA	LOC113725288	NA	NA	NA	NA
LOC113728230	NA	NA	NA	NA	LOC113727487	NA	NA	NA	NA	LOC113718022	NA	NA	NA	NA	LOC113734934	NA	NA	NA	NA	LOC113710172	NA	NA	NA	NA
LOC113711696	NA	NA	NA	NA	LOC113732554	NA	NA	NA	NA	LOC113715614	NA	NA	NA	NA	LOC113703488	NA	NA	NA	NA	LOC113727789	NA	NA	NA	NA
LOC113730476	NA	NA	NA	NA	LOC113687980	NA	NA	NA	NA	LOC113703707	NA	NA	NA	NA	LOC113739577	NA	NA	NA	NA	LOC113728055	NA	NA	NA	NA
LOC113693956	NA	NA	NA	NA	LOC113742558	NA	NA	NA	NA	LOC113706818	NA	NA	NA	NA	LOC113718634	NA	NA	NA	NA	LOC113708579	NA	NA	NA	NA
LOC113730988	NA	NA	NA	NA	LOC113699180	NA	NA	NA	NA	LOC113725364	NA	NA	NA	NA	LOC113726820	NA	NA	NA	NA	LOC113711111	NA	NA	NA	NA
LOC113707483	NA	NA	NA	NA	LOC113691026	NA	NA	NA	NA	LOC113688177	NA	NA	NA	NA	LOC113712153	NA	NA	NA	NA	LOC113695294	NA	NA	NA	NA
LOC113732938	NA	NA	NA	NA	LOC113731238	NA	NA	NA	NA	LOC113688216	NA	NA	NA	NA	LOC113710172	NA	NA	NA	NA	LOC113741805	NA	NA	NA	NA
LOC113688773	NA	NA	NA	NA	LOC113731070	NA	NA	NA	NA	LOC113702309	NA	NA	NA	NA	LOC113697601	NA	NA	NA	NA	LOC113717412	NA	NA	NA	NA
LOC113712994	NA	NA	NA	NA	LOC113714709	NA	NA	NA	NA	LOC113699983	NA	NA	NA	NA	LOC113728055	NA	NA	NA	NA	LOC113725805	NA	NA	NA	NA
LOC113731322	NA	NA	NA	NA	LOC113712308	NA	NA	NA	NA	LOC113693575	NA	NA	NA	NA	LOC113727981	NA	NA	NA	NA	LOC113712385	NA	NA	NA	NA
LOC113689556	NA	NA	NA	NA	LOC113695126	NA	NA	NA	NA	LOC113690383	NA	NA	NA	NA	LOC113715292	NA	NA	NA	NA	LOC113737864	NA	NA	NA	NA
LOC113703441	NA	NA	NA	NA	LOC113700133	NA	NA	NA	NA	LOC113707492	NA	NA	NA	NA	LOC113711111	NA	NA	NA	NA	LOC113722941	NA	NA	NA	NA
LOC113699406	NA	NA	NA	NA	LOC113734833	NA	NA	NA	NA	LOC113719296	NA	NA	NA	NA	LOC113712659	NA	NA	NA	NA	LOC113718096	NA	NA	NA	NA
LOC113702240	NA	NA	NA	NA	LOC113707023	NA	NA	NA	NA	LOC113731471	NA	NA	NA	NA	LOC113702882	NA	NA	NA	NA	LOC113743184	NA	NA	NA	NA
LOC113712872	NA	NA	NA	NA	LOC113722958	NA	NA	NA	NA	LOC113735367	NA	NA	NA	NA	LOC113728116	NA	NA	NA	NA	LOC113738365	NA	NA	NA	NA
LOC113704759	NA	NA	NA	NA	LOC113702465	NA	NA	NA	NA	LOC113727487	NA	NA	NA	NA	LOC113695294	NA	NA	NA	NA	LOC113725850	NA	NA	NA	NA
LOC113706730	NA	NA	NA	NA	LOC113741740	NA	NA	NA	NA	LOC113697256	NA	NA	NA	NA	LOC113731922	NA	NA	NA	NA	LOC113741403	NA	NA	NA	NA
LOC113741718	NA	NA	NA	NA	LOC113741854	NA	NA	NA	NA	LOC113732554	NA	NA	NA	NA	LOC113717412	NA	NA	NA	NA	LOC113714650	NA	NA	NA	NA
LOC113731654	NA	NA	NA	NA	LOC113698713	NA	NA	NA	NA	LOC113691319	NA	NA	NA	NA	LOC113725938	NA	NA	NA	NA	LOC113736472	NA	NA	NA	NA
LOC113709584	NA	NA	NA	NA	LOC113728146	NA	NA	NA	NA	LOC113687980	NA	NA	NA	NA	LOC113712385	NA	NA	NA	NA	LOC113695778	NA	NA	NA	NA
LOC113742562	NA	NA	NA	NA	LOC113702418	NA	NA	NA	NA	LOC113731238	NA	NA	NA	NA	LOC113739687	NA	NA	NA	NA	LOC113713364	NA	NA	NA	NA
LOC113729811	NA	NA	NA	NA	LOC113739679	NA	NA	NA	NA	LOC113692399	NA	NA	NA	NA	LOC113722941	NA	NA	NA	NA	LOC113743459	NA	NA	NA	NA
LOC113711814	NA	NA	NA	NA	LOC113710271	NA	NA	NA	NA	LOC113714709	NA	NA	NA	NA	LOC113723024	NA	NA	NA	NA	LOC113727284	NA	NA	NA	NA
LOC113711140	NA	NA	NA	NA	LOC113703724	NA	NA	NA	NA	LOC113730980	NA	NA	NA	NA	LOC113726929	NA	NA	NA	NA	LOC113692046	NA	NA	NA	NA
LOC113704013	NA	NA	NA	NA	LOC113688412	NA	NA	NA	NA	LOC113741163	NA	NA	NA	NA	LOC113705405	NA	NA	NA	NA	LOC113694063	NA	NA	NA	NA
LOC113692815	NA	NA	NA	NA	LOC113707864	NA	NA	NA	NA	LOC113725066	NA	NA	NA	NA	LOC113743184	NA	NA	NA	NA	LOC113697444	NA	NA	NA	NA
LOC113730630	NA	NA	NA	NA	LOC113698787	NA	NA	NA	NA	LOC113712308	NA	NA	NA	NA	LOC113724780	NA	NA	NA	NA	LOC113702416	NA	NA	NA	NA
LOC113693867	NA	NA	NA	NA	LOC113733577	NA	NA	NA	NA	LOC113734833	NA	NA	NA	NA	LOC113741403	NA	NA	NA	NA	LOC113698344	NA	NA	NA	NA
LOC113697223	NA	NA	NA	NA	LOC113712735	NA	NA	NA	NA	LOC113717160	NA	NA	NA	NA	LOC113736472	NA	NA	NA	NA	LOC113730570	NA	NA	NA	NA
LOC113699045	NA	NA	NA	NA	LOC113717666	NA	NA	NA	NA	LOC113722958	NA	NA	NA	NA	LOC113739772	NA	NA	NA	NA	LOC113734638	NA	NA	NA	NA
LOC113708100	NA	NA	NA	NA	LOC113734813	NA	NA	NA	NA	LOC113734008	NA	NA	NA	NA	LOC113695778	NA	NA	NA	NA	LOC113704070	NA	NA	NA	NA
LOC113705552	NA	NA	NA	NA	LOC113739549	NA	NA	NA	NA	LOC113695921	NA	NA	NA	NA	LOC113727192	NA	NA	NA	NA	LOC113731611	NA	NA	NA	NA
LOC113725666	NA	NA	NA	NA	LOC113712290	NA	NA	NA	NA	LOC113705575	NA	NA	NA	NA	LOC113713364	NA	NA	NA	NA	LOC113723008	NA	NA	NA	NA
LOC113738075	NA	NA	NA	NA	LOC113698098	NA	NA	NA	NA	LOC113741740	NA	NA	NA	NA	LOC113730839	NA	NA	NA	NA	LOC113697827	NA	NA	NA	NA
LOC113702046	NA	NA	NA	NA	LOC113719279	NA	NA	NA	NA	LOC113741854	NA	NA	NA	NA	LOC113743459	NA	NA	NA	NA	LOC113692613	NA	NA	NA	NA
LOC113697273	NA	NA	NA	NA	LOC113691559	NA	NA	NA	NA	LOC113711659	NA	NA	NA	NA	LOC113727284	NA	NA	NA	NA	LOC113707748	NA	NA	NA	NA
LOC113705608	NA	NA	NA	NA	LOC113712562	NA	NA	NA	NA	LOC113701750	NA	NA	NA	NA	LOC113692046	NA	NA	NA	NA	LOC113690418	NA	NA	NA	NA
LOC113742194	NA	NA	NA	NA	LOC113695941	NA	NA	NA	NA	LOC113727977	NA	NA	NA	NA	LOC113697032	NA	NA	NA	NA	LOC113731316	NA	NA	NA	NA
LOC113700110	NA	NA	NA	NA	LOC113728033	NA	NA	NA	NA	LOC113728146	NA	NA	NA	NA	LOC113730570	NA	NA	NA	NA	LOC113708520	NA	NA	NA	NA
LOC113712314	NA	NA	NA	NA	LOC113728084	NA	NA	NA	NA	LOC113734670	NA	NA	NA	NA	LOC113734638	NA	NA	NA	NA	LOC113703723	NA	NA	NA	NA
LOC113690971	NA	NA	NA	NA	LOC113722711	NA	NA	NA	NA	LOC113690523	NA	NA	NA	NA	LOC113728129	NA	NA	NA	NA	LOC113732323	NA	NA	NA	NA
LOC113701789	NA	NA	NA	NA	LOC113700066	NA	NA	NA	NA	LOC113703866	NA	NA	NA	NA	LOC113706500	NA	NA	NA	NA	LOC113693630	NA	NA	NA	NA
LOC113695248	NA	NA	NA	NA	LOC113691637	NA	NA	NA	NA	LOC113693881	NA	NA	NA	NA	LOC113736597	NA	NA	NA	NA	LOC113736248	NA	NA	NA	NA
LOC113706658	NA	NA	NA	NA	LOC113708963	NA	NA	NA	NA	LOC113739912	NA	NA	NA	NA	LOC113693961	NA	NA	NA	NA	LOC113731420	NA	NA	NA	NA
LOC113732602	NA	NA	NA	NA	LOC113718034	NA	NA	NA	NA	LOC113717962	NA	NA	NA	NA	LOC113703548	NA	NA	NA	NA	LOC113736605	NA	NA	NA	NA
LOC113732487	NA	NA	NA	NA	LOC113707777	NA	NA	NA	NA	LOC113688412	NA	NA	NA	NA	LOC113724775	NA	NA	NA	NA	LOC113731748	NA	NA	NA	NA
LOC113742731	NA	NA	NA	NA	LOC113702103	NA	NA	NA	NA	LOC113707864	NA	NA	NA	NA	LOC113741261	NA	NA	NA	NA	LOC113697005	NA	NA	NA	NA
LOC113707444	NA	NA	NA	NA	LOC113712247	NA	NA	NA	NA	LOC113726043	NA	NA	NA	NA	LOC113725782	NA	NA	NA	NA	LOC113709034	NA	NA	NA	NA
LOC113711015	NA	NA	NA	NA	LOC113708559	NA	NA	NA	NA	LOC113712735	NA	NA	NA	NA	LOC113708845	NA	NA	NA	NA	LOC113710508	NA	NA	NA	NA
LOC113709702	NA	NA	NA	NA	LOC113688959	NA	NA	NA	NA	LOC113693904	NA	NA	NA	NA	LOC113708520	NA	NA	NA	NA	LOC113730953	NA	NA	NA	NA
LOC113708893	NA	NA	NA	NA	LOC113741354	NA	NA	NA	NA	LOC113739549	NA	NA	NA	NA	LOC113693630	NA	NA	NA	NA	LOC113712322	NA	NA	NA	NA
LOC113743656	NA	NA	NA	NA	LOC113740108	NA	NA	NA	NA	LOC113703847	NA	NA	NA	NA	LOC113710171	NA	NA	NA	NA	LOC113703991	NA	NA	NA	NA
LOC113736201	NA	NA	NA	NA	LOC113703599	NA	NA	NA	NA	LOC113725995	NA	NA	NA	NA	LOC113736248	NA	NA	NA	NA	LOC113710616	NA	NA	NA	NA
LOC113706399	NA	NA	NA	NA	LOC113734542	NA	NA	NA	NA	LOC113698098	NA	NA	NA	NA	LOC113731748	NA	NA	NA	NA	LOC113737866	NA	NA	NA	NA
LOC113704122	NA	NA	NA	NA	LOC113734763	NA	NA	NA	NA	LOC113717151	NA	NA	NA	NA	LOC113742889	NA	NA	NA	NA	LOC113736582	NA	NA	NA	NA
LOC113702172	NA	NA	NA	NA	LOC113694805	NA	NA	NA	NA	LOC113697023	NA	NA	NA	NA	LOC113711689	NA	NA	NA	NA	LOC113714685	NA	NA	NA	NA
LOC113695226	NA	NA	NA	NA	LOC113724939	NA	NA	NA	NA	LOC113703402	NA	NA	NA	NA	LOC113707476	NA	NA	NA	NA	LOC113719143	NA	NA	NA	NA
LOC113715143	NA	NA	NA	NA	LOC113702389	NA	NA	NA	NA	LOC113726559	NA	NA	NA	NA	LOC113730953	NA	NA	NA	NA	LOC113707935	NA	NA	NA	NA
LOC113708952	NA	NA	NA	NA	LOC113724192	NA	NA	NA	NA	LOC113695941	NA	NA	NA	NA	LOC113727132	NA	NA	NA	NA	LOC113713371	NA	NA	NA	NA
LOC113730635	NA	NA	NA	NA	LOC113730790	NA	NA	NA	NA	LOC113706867	NA	NA	NA	NA	LOC113730868	NA	NA	NA	NA	LOC113687919	NA	NA	NA	NA
LOC113740431	NA	NA	NA	NA	LOC113727299	NA	NA	NA	NA	LOC113730841	NA	NA	NA	NA	LOC113737866	NA	NA	NA	NA	LOC113730051	NA	NA	NA	NA
LOC113691045	NA	NA	NA	NA	LOC113691330	NA	NA	NA	NA	LOC113700968	NA	NA	NA	NA	LOC113705376	NA	NA	NA	NA	LOC113699536	NA	NA	NA	NA
LOC113704175	NA	NA	NA	NA	LOC113699246	NA	NA	NA	NA	LOC113725703	NA	NA	NA	NA	LOC113693311	NA	NA	NA	NA	LOC113709416	NA	NA	NA	NA
LOC113695663	NA	NA	NA	NA	LOC113698597	NA	NA	NA	NA	LOC113728033	NA	NA	NA	NA	LOC113705663	NA	NA	NA	NA	LOC113730134	NA	NA	NA	NA
LOC113700455	NA	NA	NA	NA	LOC113733054	NA	NA	NA	NA	LOC113728084	NA	NA	NA	NA	LOC113714685	NA	NA	NA	NA	LOC113739703	NA	NA	NA	NA
LOC113711033	NA	NA	NA	NA	LOC113732778	NA	NA	NA	NA	LOC113714801	NA	NA	NA	NA	LOC113742560	NA	NA	NA	NA	LOC113701984	NA	NA	NA	NA
LOC113697027	NA	NA	NA	NA	LOC113690767	NA	NA	NA	NA	LOC113700066	NA	NA	NA	NA	LOC113707935	NA	NA	NA	NA	LOC113701830	NA	NA	NA	NA
LOC113715418	NA	NA	NA	NA	LOC113691132	NA	NA	NA	NA	LOC113708814	NA	NA	NA	NA	LOC113741326	NA	NA	NA	NA	LOC113731620	NA	NA	NA	NA
LOC113722293	NA	NA	NA	NA	LOC113733010	NA	NA	NA	NA	LOC113733739	NA	NA	NA	NA	LOC113704365	NA	NA	NA	NA	LOC113694269	NA	NA	NA	NA
LOC113696195	NA	NA	NA	NA	LOC113699018	NA	NA	NA	NA	LOC113710373	NA	NA	NA	NA	LOC113715659	NA	NA	NA	NA	LOC113717754	NA	NA	NA	NA
LOC113739966	NA	NA	NA	NA	LOC113728674	NA	NA	NA	NA	LOC113702103	NA	NA	NA	NA	LOC113696973	NA	NA	NA	NA	LOC113706114	NA	NA	NA	NA
LOC113730672	NA	NA	NA	NA	LOC113717620	NA	NA	NA	NA	LOC113716696	NA	NA	NA	NA	LOC113699536	NA	NA	NA	NA	LOC113696175	NA	NA	NA	NA
LOC113725633	NA	NA	NA	NA	LOC113692718	NA	NA	NA	NA	LOC113725723	NA	NA	NA	NA	LOC113701832	NA	NA	NA	NA	LOC113695933	NA	NA	NA	NA
LOC113712627	NA	NA	NA	NA	LOC113698339	NA	NA	NA	NA	LOC113733965	NA	NA	NA	NA	LOC113726495	NA	NA	NA	NA	LOC113694253	NA	NA	NA	NA
LOC113692839	NA	NA	NA	NA	LOC113707286	NA	NA	NA	NA	LOC113712247	NA	NA	NA	NA	LOC113723087	NA	NA	NA	NA	LOC113731173	NA	NA	NA	NA
LOC113726732	NA	NA	NA	NA	LOC113723026	NA	NA	NA	NA	LOC113722937	NA	NA	NA	NA	LOC113699259	NA	NA	NA	NA	LOC113699327	NA	NA	NA	NA
LOC113725382	NA	NA	NA	NA	LOC113702078	NA	NA	NA	NA	LOC113688959	NA	NA	NA	NA	LOC113707161	NA	NA	NA	NA	LOC113718909	NA	NA	NA	NA
LOC113701760	NA	NA	NA	NA	LOC113722458	NA	NA	NA	NA	LOC113730790	NA	NA	NA	NA	LOC113731620	NA	NA	NA	NA	LOC113694243	NA	NA	NA	NA
LOC113741568	NA	NA	NA	NA	LOC113697062	NA	NA	NA	NA	LOC113736870	NA	NA	NA	NA	LOC113717754	NA	NA	NA	NA	LOC113710477	NA	NA	NA	NA
LOC113697916	NA	NA	NA	NA	LOC113742206	NA	NA	NA	NA	LOC113688036	NA	NA	NA	NA	LOC113738389	NA	NA	NA	NA	LOC113711669	NA	NA	NA	NA
LOC113726649	NA	NA	NA	NA	LOC113692560	NA	NA	NA	NA	LOC113699246	NA	NA	NA	NA	LOC113725563	NA	NA	NA	NA	LOC113732714	NA	NA	NA	NA
LOC113716344	NA	NA	NA	NA	LOC113738609	NA	NA	NA	NA	LOC113733054	NA	NA	NA	NA	LOC113700439	NA	NA	NA	NA	LOC113742295	NA	NA	NA	NA
LOC113693880	NA	NA	NA	NA	LOC113696100	NA	NA	NA	NA	LOC113739947	NA	NA	NA	NA	LOC113695933	NA	NA	NA	NA	LOC113729892	NA	NA	NA	NA
LOC113692582	NA	NA	NA	NA	LOC113710953	NA	NA	NA	NA	LOC113694951	NA	NA	NA	NA	LOC113727891	NA	NA	NA	NA	LOC113712174	NA	NA	NA	NA
LOC113742127	NA	NA	NA	NA	LOC113701627	NA	NA	NA	NA	LOC113709449	NA	NA	NA	NA	LOC113722960	NA	NA	NA	NA	LOC113702600	NA	NA	NA	NA
LOC113715606	NA	NA	NA	NA	LOC113698951	NA	NA	NA	NA	LOC113733010	NA	NA	NA	NA	LOC113694253	NA	NA	NA	NA	LOC113702383	NA	NA	NA	NA
LOC113724782	NA	NA	NA	NA	LOC113699080	NA	NA	NA	NA	LOC113717084	NA	NA	NA	NA	LOC113712282	NA	NA	NA	NA	LOC113697371	NA	NA	NA	NA
LOC113697172	NA	NA	NA	NA	LOC113700256	NA	NA	NA	NA	LOC113696106	NA	NA	NA	NA	LOC113734039	NA	NA	NA	NA	LOC113707680	NA	NA	NA	NA
LOC113695065	NA	NA	NA	NA	LOC113720754	NA	NA	NA	NA	LOC113740349	NA	NA	NA	NA	LOC113718909	NA	NA	NA	NA	LOC113693995	NA	NA	NA	NA
LOC113742730	NA	NA	NA	NA	LOC113728025	NA	NA	NA	NA	LOC113692718	NA	NA	NA	NA	LOC113699144	NA	NA	NA	NA	LOC113726487	NA	NA	NA	NA
LOC113739937	NA	NA	NA	NA	LOC113725719	NA	NA	NA	NA	LOC113694059	NA	NA	NA	NA	LOC113688218	NA	NA	NA	NA	LOC113739365	NA	NA	NA	NA
LOC113739573	NA	NA	NA	NA	LOC113712068	NA	NA	NA	NA	LOC113732462	NA	NA	NA	NA	LOC113691388	NA	NA	NA	NA	LOC113727161	NA	NA	NA	NA
LOC113714632	NA	NA	NA	NA	LOC113689963	NA	NA	NA	NA	LOC113722724	NA	NA	NA	NA	LOC113731932	NA	NA	NA	NA	LOC113742768	NA	NA	NA	NA
LOC113726128	NA	NA	NA	NA	LOC113714507	NA	NA	NA	NA	LOC113731011	NA	NA	NA	NA	LOC113711669	NA	NA	NA	NA	LOC113697460	NA	NA	NA	NA
LOC113696239	NA	NA	NA	NA	LOC113702140	NA	NA	NA	NA	LOC113687950	NA	NA	NA	NA	LOC113732714	NA	NA	NA	NA	LOC113725810	NA	NA	NA	NA
LOC113726115	NA	NA	NA	NA	LOC113717088	NA	NA	NA	NA	LOC113699197	NA	NA	NA	NA	LOC113709304	NA	NA	NA	NA	LOC113732097	NA	NA	NA	NA
LOC113692803	NA	NA	NA	NA	LOC113698974	NA	NA	NA	NA	LOC113699282	NA	NA	NA	NA	LOC113734402	NA	NA	NA	NA	LOC113701962	NA	NA	NA	NA
LOC113731182	NA	NA	NA	NA	LOC113710186	NA	NA	NA	NA	LOC113725934	NA	NA	NA	NA	LOC113712174	NA	NA	NA	NA	LOC113688129	NA	NA	NA	NA
LOC113726560	NA	NA	NA	NA	LOC113735219	NA	NA	NA	NA	LOC113715599	NA	NA	NA	NA	LOC113702600	NA	NA	NA	NA	LOC113708651	NA	NA	NA	NA
LOC113743049	NA	NA	NA	NA	LOC113717669	NA	NA	NA	NA	LOC113709510	NA	NA	NA	NA	LOC113727692	NA	NA	NA	NA	LOC113704403	NA	NA	NA	NA
LOC113700033	NA	NA	NA	NA	LOC113717723	NA	NA	NA	NA	LOC113710592	NA	NA	NA	NA	LOC113738087	NA	NA	NA	NA	LOC113721955	NA	NA	NA	NA
LOC113697361	NA	NA	NA	NA	LOC113714044	NA	NA	NA	NA	LOC113699906	NA	NA	NA	NA	LOC113736636	NA	NA	NA	NA	LOC113693923	NA	NA	NA	NA
LOC113729334	NA	NA	NA	NA	LOC113711706	NA	NA	NA	NA	LOC113691579	NA	NA	NA	NA	LOC113726487	NA	NA	NA	NA	LOC113708657	NA	NA	NA	NA
LOC113701827	NA	NA	NA	NA	LOC113694141	NA	NA	NA	NA	LOC113712286	NA	NA	NA	NA	LOC113695899	NA	NA	NA	NA	LOC113727509	NA	NA	NA	NA
LOC113732765	NA	NA	NA	NA	LOC113738575	NA	NA	NA	NA	LOC113699263	NA	NA	NA	NA	LOC113739365	NA	NA	NA	NA	LOC113710236	NA	NA	NA	NA
LOC113732010	NA	NA	NA	NA	LOC113730018	NA	NA	NA	NA	LOC113702140	NA	NA	NA	NA	LOC113707003	NA	NA	NA	NA	LOC113731829	NA	NA	NA	NA
LOC113701727	NA	NA	NA	NA	LOC113711625	NA	NA	NA	NA	LOC113716755	NA	NA	NA	NA	LOC113688129	NA	NA	NA	NA	LOC113701175	NA	NA	NA	NA
LOC113713618	NA	NA	NA	NA	LOC113735687	NA	NA	NA	NA	LOC113741580	NA	NA	NA	NA	LOC113708651	NA	NA	NA	NA	LOC113698374	NA	NA	NA	NA
LOC113727511	NA	NA	NA	NA	LOC113722895	NA	NA	NA	NA	LOC113714525	NA	NA	NA	NA	LOC113693923	NA	NA	NA	NA	LOC113700349	NA	NA	NA	NA
LOC113720212	NA	NA	NA	NA	LOC113688937	NA	NA	NA	NA	LOC113698974	NA	NA	NA	NA	LOC113715639	NA	NA	NA	NA	LOC113704225	NA	NA	NA	NA
LOC113707234	NA	NA	NA	NA	LOC113709284	NA	NA	NA	NA	LOC113717669	NA	NA	NA	NA	LOC113708657	NA	NA	NA	NA	LOC113693845	NA	NA	NA	NA
LOC113712742	NA	NA	NA	NA	LOC113713782	NA	NA	NA	NA	LOC113725494	NA	NA	NA	NA	LOC113727509	NA	NA	NA	NA	LOC113742776	NA	NA	NA	NA
LOC113695631	NA	NA	NA	NA	LOC113739836	NA	NA	NA	NA	LOC113733855	NA	NA	NA	NA	LOC113702024	NA	NA	NA	NA	LOC113699175	NA	NA	NA	NA
LOC113701656	NA	NA	NA	NA	LOC113714731	NA	NA	NA	NA	LOC113732521	NA	NA	NA	NA	LOC113693845	NA	NA	NA	NA	LOC113742214	NA	NA	NA	NA
LOC113732100	NA	NA	NA	NA	LOC113693719	NA	NA	NA	NA	LOC113691709	NA	NA	NA	NA	LOC113710915	NA	NA	NA	NA	LOC113714934	NA	NA	NA	NA
LOC113742434	NA	NA	NA	NA	LOC113739575	NA	NA	NA	NA	LOC113694141	NA	NA	NA	NA	LOC113728848	NA	NA	NA	NA	LOC113714359	NA	NA	NA	NA
LOC113735216	NA	NA	NA	NA	LOC113688790	NA	NA	NA	NA	LOC113738575	NA	NA	NA	NA	LOC113705796	NA	NA	NA	NA	LOC113732557	NA	NA	NA	NA
LOC113730656	NA	NA	NA	NA	LOC113693562	NA	NA	NA	NA	LOC113742826	NA	NA	NA	NA	LOC113714934	NA	NA	NA	NA	LOC113702793	NA	NA	NA	NA
LOC113705502	NA	NA	NA	NA	LOC113730702	NA	NA	NA	NA	LOC113711625	NA	NA	NA	NA	LOC113718330	NA	NA	NA	NA	LOC113697002	NA	NA	NA	NA
LOC113731683	NA	NA	NA	NA	LOC113694634	NA	NA	NA	NA	LOC113694193	NA	NA	NA	NA	LOC113718627	NA	NA	NA	NA	LOC113732087	NA	NA	NA	NA
LOC113711496	NA	NA	NA	NA	LOC113703159	NA	NA	NA	NA	LOC113722895	NA	NA	NA	NA	LOC113732557	NA	NA	NA	NA	LOC113715709	NA	NA	NA	NA
LOC113706892	NA	NA	NA	NA	LOC113734421	NA	NA	NA	NA	LOC113739836	NA	NA	NA	NA	LOC113692575	NA	NA	NA	NA	LOC113739781	NA	NA	NA	NA
LOC113714402	NA	NA	NA	NA	LOC113734965	NA	NA	NA	NA	LOC113714731	NA	NA	NA	NA	LOC113692988	NA	NA	NA	NA	LOC113739605	NA	NA	NA	NA
LOC113699047	NA	NA	NA	NA	LOC113722933	NA	NA	NA	NA	LOC113731185	NA	NA	NA	NA	LOC113695972	NA	NA	NA	NA	LOC113716850	NA	NA	NA	NA
LOC113689683	NA	NA	NA	NA	LOC113731897	NA	NA	NA	NA	LOC113704030	NA	NA	NA	NA	LOC113734174	NA	NA	NA	NA	LOC113736712	NA	NA	NA	NA
LOC113698988	NA	NA	NA	NA	LOC113738406	NA	NA	NA	NA	LOC113712729	NA	NA	NA	NA	LOC113736712	NA	NA	NA	NA	LOC113727018	NA	NA	NA	NA
LOC113696095	NA	NA	NA	NA	LOC113708025	NA	NA	NA	NA	LOC113703159	NA	NA	NA	NA	LOC113742787	NA	NA	NA	NA	LOC113702742	NA	NA	NA	NA
LOC113743332	NA	NA	NA	NA	LOC113706721	NA	NA	NA	NA	LOC113693964	NA	NA	NA	NA	LOC113706642	NA	NA	NA	NA	LOC113688924	NA	NA	NA	NA
LOC113735097	NA	NA	NA	NA	LOC113698561	NA	NA	NA	NA	LOC113732885	NA	NA	NA	NA	LOC113707656	NA	NA	NA	NA	LOC113710281	NA	NA	NA	NA
LOC113734698	NA	NA	NA	NA	LOC113732015	NA	NA	NA	NA	LOC113696979	NA	NA	NA	NA	LOC113696767	NA	NA	NA	NA	LOC113702007	NA	NA	NA	NA
LOC113730775	NA	NA	NA	NA	LOC113713851	NA	NA	NA	NA	LOC113693720	NA	NA	NA	NA	LOC113688020	NA	NA	NA	NA	LOC113699269	NA	NA	NA	NA
LOC113725260	NA	NA	NA	NA	LOC113703862	NA	NA	NA	NA	LOC113723071	NA	NA	NA	NA	LOC113742935	NA	NA	NA	NA	LOC113707656	NA	NA	NA	NA
LOC113718730	NA	NA	NA	NA	LOC113715479	NA	NA	NA	NA	LOC113738106	NA	NA	NA	NA	LOC113726551	NA	NA	NA	NA	LOC113690726	NA	NA	NA	NA
LOC113735612	NA	NA	NA	NA	LOC113704241	NA	NA	NA	NA	LOC113742180	NA	NA	NA	NA	LOC113732951	NA	NA	NA	NA	LOC113707463	NA	NA	NA	NA
LOC113706895	NA	NA	NA	NA	LOC113732104	NA	NA	NA	NA	LOC113734965	NA	NA	NA	NA	LOC113740589	NA	NA	NA	NA	LOC113719705	NA	NA	NA	NA
LOC113717130	NA	NA	NA	NA	LOC113717304	NA	NA	NA	NA	LOC113726475	NA	NA	NA	NA	LOC113732150	NA	NA	NA	NA	LOC113732951	NA	NA	NA	NA
LOC113709464	NA	NA	NA	NA	LOC113737069	NA	NA	NA	NA	LOC113732575	NA	NA	NA	NA	LOC113702963	NA	NA	NA	NA	LOC113728493	NA	NA	NA	NA
LOC113732012	NA	NA	NA	NA	LOC113690449	NA	NA	NA	NA	LOC113731897	NA	NA	NA	NA	LOC113725992	NA	NA	NA	NA	LOC113732085	NA	NA	NA	NA
LOC113727146	NA	NA	NA	NA	LOC113713898	NA	NA	NA	NA	LOC113708025	NA	NA	NA	NA	LOC113725212	NA	NA	NA	NA	LOC113714836	NA	NA	NA	NA
LOC113715221	NA	NA	NA	NA	LOC113739578	NA	NA	NA	NA	LOC113722738	NA	NA	NA	NA	LOC113701662	NA	NA	NA	NA	LOC113725012	NA	NA	NA	NA
LOC113698084	NA	NA	NA	NA	LOC113733166	NA	NA	NA	NA	LOC113700431	NA	NA	NA	NA	LOC113711936	NA	NA	NA	NA	LOC113699192	NA	NA	NA	NA
LOC113701197	NA	NA	NA	NA	LOC113718721	NA	NA	NA	NA	LOC113725022	NA	NA	NA	NA	LOC113690729	NA	NA	NA	NA	LOC113696048	NA	NA	NA	NA
LOC113697102	NA	NA	NA	NA	LOC113692882	NA	NA	NA	NA	LOC113713417	NA	NA	NA	NA	LOC113700098	NA	NA	NA	NA	LOC113725212	NA	NA	NA	NA
LOC113694235	NA	NA	NA	NA	LOC113708919	NA	NA	NA	NA	LOC113713851	NA	NA	NA	NA	LOC113697234	NA	NA	NA	NA	LOC113725774	NA	NA	NA	NA
LOC113690529	NA	NA	NA	NA	LOC113712315	NA	NA	NA	NA	LOC113690795	NA	NA	NA	NA	LOC113705251	NA	NA	NA	NA	LOC113688908	NA	NA	NA	NA
LOC113704431	NA	NA	NA	NA	LOC113716493	NA	NA	NA	NA	LOC113715479	NA	NA	NA	NA	LOC113719516	NA	NA	NA	NA	LOC113719540	NA	NA	NA	NA
LOC113703454	NA	NA	NA	NA	LOC113701645	NA	NA	NA	NA	LOC113704241	NA	NA	NA	NA	LOC113690274	NA	NA	NA	NA	LOC113690729	NA	NA	NA	NA
LOC113696072	NA	NA	NA	NA	LOC113733044	NA	NA	NA	NA	LOC113729918	NA	NA	NA	NA	LOC113712576	NA	NA	NA	NA	LOC113727053	NA	NA	NA	NA
LOC113698587	NA	NA	NA	NA	LOC113742184	NA	NA	NA	NA	LOC113723253	NA	NA	NA	NA	LOC113742785	NA	NA	NA	NA	LOC113700098	NA	NA	NA	NA
LOC113742305	NA	NA	NA	NA	LOC113707796	NA	NA	NA	NA	LOC113705530	NA	NA	NA	NA	LOC113690407	NA	NA	NA	NA	LOC113698251	NA	NA	NA	NA
LOC113733097	NA	NA	NA	NA	LOC113698046	NA	NA	NA	NA	LOC113691079	NA	NA	NA	NA	LOC113704198	NA	NA	NA	NA	LOC113740254	NA	NA	NA	NA
LOC113713277	NA	NA	NA	NA	LOC113724744	NA	NA	NA	NA	LOC113690449	NA	NA	NA	NA	LOC113727791	NA	NA	NA	NA	LOC113690274	NA	NA	NA	NA
LOC113725205	NA	NA	NA	NA	LOC113735814	NA	NA	NA	NA	LOC113702800	NA	NA	NA	NA	LOC113738701	NA	NA	NA	NA	LOC113710785	NA	NA	NA	NA
LOC113727462	NA	NA	NA	NA	LOC113717183	NA	NA	NA	NA	LOC113694769	NA	NA	NA	NA	LOC113713707	NA	NA	NA	NA	LOC113742785	NA	NA	NA	NA
LOC113702047	NA	NA	NA	NA	LOC113694904	NA	NA	NA	NA	LOC113739578	NA	NA	NA	NA	LOC113707717	NA	NA	NA	NA	LOC113690407	NA	NA	NA	NA
LOC113699424	NA	NA	NA	NA	LOC113727088	NA	NA	NA	NA	LOC113734990	NA	NA	NA	NA	LOC113692768	NA	NA	NA	NA	LOC113696122	NA	NA	NA	NA
LOC113706916	NA	NA	NA	NA	LOC113724761	NA	NA	NA	NA	LOC113695090	NA	NA	NA	NA	LOC113708369	NA	NA	NA	NA	LOC113712272	NA	NA	NA	NA
LOC113702143	NA	NA	NA	NA	LOC113706982	NA	NA	NA	NA	LOC113692882	NA	NA	NA	NA	LOC113729784	NA	NA	NA	NA	LOC113696185	NA	NA	NA	NA
LOC113688263	NA	NA	NA	NA	LOC113727767	NA	NA	NA	NA	LOC113694640	NA	NA	NA	NA	LOC113742351	NA	NA	NA	NA	LOC113727791	NA	NA	NA	NA
LOC113714752	NA	NA	NA	NA	LOC113719680	NA	NA	NA	NA	LOC113734231	NA	NA	NA	NA	LOC113688550	NA	NA	NA	NA	LOC113739558	NA	NA	NA	NA
LOC113690724	NA	NA	NA	NA	LOC113741571	NA	NA	NA	NA	LOC113712315	NA	NA	NA	NA	LOC113733291	NA	NA	NA	NA	LOC113697889	NA	NA	NA	NA
LOC113712909	NA	NA	NA	NA	LOC113714797	NA	NA	NA	NA	LOC113701645	NA	NA	NA	NA	LOC113705841	NA	NA	NA	NA	LOC113690770	NA	NA	NA	NA
LOC113735152	NA	NA	NA	NA	LOC113694077	NA	NA	NA	NA	LOC113742184	NA	NA	NA	NA	LOC113709088	NA	NA	NA	NA	LOC113726023	NA	NA	NA	NA
LOC113713078	NA	NA	NA	NA	LOC113725505	NA	NA	NA	NA	LOC113694793	NA	NA	NA	NA	LOC113712662	NA	NA	NA	NA	LOC113713707	NA	NA	NA	NA
LOC113710495	NA	NA	NA	NA	LOC113709426	NA	NA	NA	NA	LOC113735814	NA	NA	NA	NA	LOC113706314	NA	NA	NA	NA	LOC113717344	NA	NA	NA	NA
LOC113706972	NA	NA	NA	NA	LOC113696254	NA	NA	NA	NA	LOC113743701	NA	NA	NA	NA	LOC113710580	NA	NA	NA	NA	LOC113736264	NA	NA	NA	NA
LOC113700059	NA	NA	NA	NA	LOC113734350	NA	NA	NA	NA	LOC113712353	NA	NA	NA	NA	LOC113731941	NA	NA	NA	NA	LOC113704112	NA	NA	NA	NA
LOC113690215	NA	NA	NA	NA	LOC113719357	NA	NA	NA	NA	LOC113703678	NA	NA	NA	NA	LOC113695900	NA	NA	NA	NA	LOC113708649	NA	NA	NA	NA
LOC113734934	NA	NA	NA	NA	LOC113727002	NA	NA	NA	NA	LOC113698771	NA	NA	NA	NA	LOC113692728	NA	NA	NA	NA	LOC113709088	NA	NA	NA	NA
LOC113703488	NA	NA	NA	NA	LOC113697483	NA	NA	NA	NA	LOC113739833	NA	NA	NA	NA	LOC113731855	NA	NA	NA	NA	LOC113712662	NA	NA	NA	NA
LOC113725288	NA	NA	NA	NA	LOC113695945	NA	NA	NA	NA	LOC113741571	NA	NA	NA	NA	LOC113724781	NA	NA	NA	NA	LOC113702264	NA	NA	NA	NA
LOC113738058	NA	NA	NA	NA	LOC113734225	NA	NA	NA	NA	LOC113716473	NA	NA	NA	NA	LOC113703577	NA	NA	NA	NA	LOC113706314	NA	NA	NA	NA
LOC113739577	NA	NA	NA	NA	LOC113742105	NA	NA	NA	NA	LOC113725505	NA	NA	NA	NA	LOC113691280	NA	NA	NA	NA	LOC113725435	NA	NA	NA	NA
LOC113694106	NA	NA	NA	NA	LOC113742431	NA	NA	NA	NA	LOC113740353	NA	NA	NA	NA	LOC113719178	NA	NA	NA	NA	LOC113731941	NA	NA	NA	NA
LOC113710172	NA	NA	NA	NA	LOC113707347	NA	NA	NA	NA	LOC113734808	NA	NA	NA	NA	LOC113687922	NA	NA	NA	NA	LOC113730115	NA	NA	NA	NA
LOC113714528	NA	NA	NA	NA	LOC113731140	NA	NA	NA	NA	LOC113717343	NA	NA	NA	NA	LOC113741392	NA	NA	NA	NA	LOC113692728	NA	NA	NA	NA
LOC113706700	NA	NA	NA	NA	LOC113730103	NA	NA	NA	NA	LOC113703036	NA	NA	NA	NA	LOC113707884	NA	NA	NA	NA	LOC113731855	NA	NA	NA	NA
LOC113697601	NA	NA	NA	NA	LOC113712388	NA	NA	NA	NA	LOC113732057	NA	NA	NA	NA	LOC113692833	NA	NA	NA	NA	LOC113703577	NA	NA	NA	NA
LOC113728055	NA	NA	NA	NA	LOC113728092	NA	NA	NA	NA	LOC113688239	NA	NA	NA	NA	LOC113732579	NA	NA	NA	NA	LOC113707832	NA	NA	NA	NA
LOC113712659	NA	NA	NA	NA	LOC113715318	NA	NA	NA	NA	LOC113707347	NA	NA	NA	NA	LOC113726574	NA	NA	NA	NA	LOC113719178	NA	NA	NA	NA
LOC113707352	NA	NA	NA	NA	LOC113690461	NA	NA	NA	NA	LOC113731140	NA	NA	NA	NA	LOC113742158	NA	NA	NA	NA	LOC113696204	NA	NA	NA	NA
LOC113712385	NA	NA	NA	NA	LOC113729836	NA	NA	NA	NA	LOC113730103	NA	NA	NA	NA	LOC113730918	NA	NA	NA	NA	LOC113712470	NA	NA	NA	NA
LOC113716983	NA	NA	NA	NA	LOC113730554	NA	NA	NA	NA	LOC113697957	NA	NA	NA	NA	LOC113731766	NA	NA	NA	NA	LOC113700435	NA	NA	NA	NA
LOC113725985	NA	NA	NA	NA	LOC113727484	NA	NA	NA	NA	LOC113739753	NA	NA	NA	NA	LOC113732044	NA	NA	NA	NA	LOC113707271	NA	NA	NA	NA
LOC113701332	NA	NA	NA	NA	LOC113726924	NA	NA	NA	NA	LOC113722997	NA	NA	NA	NA	LOC113709655	NA	NA	NA	NA	LOC113736758	NA	NA	NA	NA
LOC113722941	NA	NA	NA	NA	LOC113715356	NA	NA	NA	NA	LOC113688029	NA	NA	NA	NA	LOC113695836	NA	NA	NA	NA	LOC113703122	NA	NA	NA	NA
LOC113717243	NA	NA	NA	NA	LOC113704104	NA	NA	NA	NA	LOC113709122	NA	NA	NA	NA	LOC113724777	NA	NA	NA	NA	LOC113732579	NA	NA	NA	NA
LOC113726929	NA	NA	NA	NA	LOC113717368	NA	NA	NA	NA	LOC113729836	NA	NA	NA	NA	LOC113691864	NA	NA	NA	NA	LOC113723110	NA	NA	NA	NA
LOC113707786	NA	NA	NA	NA	LOC113734004	NA	NA	NA	NA	LOC113727484	NA	NA	NA	NA	LOC113733259	NA	NA	NA	NA	LOC113742158	NA	NA	NA	NA
LOC113743184	NA	NA	NA	NA	LOC113707488	NA	NA	NA	NA	LOC113714681	NA	NA	NA	NA	LOC113715125	NA	NA	NA	NA	LOC113733891	NA	NA	NA	NA
LOC113730002	NA	NA	NA	NA	LOC113725315	NA	NA	NA	NA	LOC113706747	NA	NA	NA	NA	LOC113726515	NA	NA	NA	NA	LOC113731643	NA	NA	NA	NA
LOC113724780	NA	NA	NA	NA	LOC113732777	NA	NA	NA	NA	LOC113693898	NA	NA	NA	NA	LOC113710681	NA	NA	NA	NA	LOC113733138	NA	NA	NA	NA
LOC113741403	NA	NA	NA	NA	LOC113738121	NA	NA	NA	NA	LOC113717368	NA	NA	NA	NA	LOC113697074	NA	NA	NA	NA	LOC113735255	NA	NA	NA	NA
LOC113714650	NA	NA	NA	NA	LOC113741749	NA	NA	NA	NA	LOC113710751	NA	NA	NA	NA	LOC113722174	NA	NA	NA	NA	LOC113695836	NA	NA	NA	NA
LOC113699951	NA	NA	NA	NA	LOC113693946	NA	NA	NA	NA	LOC113734004	NA	NA	NA	NA	LOC113702944	NA	NA	NA	NA	LOC113724777	NA	NA	NA	NA
LOC113713364	NA	NA	NA	NA	LOC113732033	NA	NA	NA	NA	LOC113719543	NA	NA	NA	NA	LOC113718022	NA	NA	NA	NA	LOC113742744	NA	NA	NA	NA
LOC113736552	NA	NA	NA	NA	LOC113696132	NA	NA	NA	NA	LOC113695342	NA	NA	NA	NA	LOC113695246	NA	NA	NA	NA	LOC113716349	NA	NA	NA	NA
LOC113730511	NA	NA	NA	NA	LOC113710619	NA	NA	NA	NA	LOC113733853	NA	NA	NA	NA	LOC113706818	NA	NA	NA	NA	LOC113702080	NA	NA	NA	NA
LOC113727284	NA	NA	NA	NA	LOC113730394	NA	NA	NA	NA	LOC113693946	NA	NA	NA	NA	LOC113731026	NA	NA	NA	NA	LOC113703863	NA	NA	NA	NA
LOC113727279	NA	NA	NA	NA	LOC113701723	NA	NA	NA	NA	LOC113726062	NA	NA	NA	NA	LOC113719100	NA	NA	NA	NA	LOC113715125	NA	NA	NA	NA
LOC113732732	NA	NA	NA	NA	LOC113723674	NA	NA	NA	NA	LOC113727189	NA	NA	NA	NA	LOC113688216	NA	NA	NA	NA	LOC113710681	NA	NA	NA	NA
LOC113699994	NA	NA	NA	NA	LOC113712358	NA	NA	NA	NA	LOC113696133	NA	NA	NA	NA	LOC113734679	NA	NA	NA	NA	LOC113710232	NA	NA	NA	NA
LOC113738637	NA	NA	NA	NA	LOC113692212	NA	NA	NA	NA	LOC113732920	NA	NA	NA	NA	LOC113690396	NA	NA	NA	NA	LOC113697074	NA	NA	NA	NA
LOC113694063	NA	NA	NA	NA	LOC113722930	NA	NA	NA	NA	LOC113730394	NA	NA	NA	NA	LOC113693575	NA	NA	NA	NA	LOC113722174	NA	NA	NA	NA
LOC113697444	NA	NA	NA	NA	LOC113697793	NA	NA	NA	NA	LOC113697261	NA	NA	NA	NA	LOC113727249	NA	NA	NA	NA	LOC113723990	NA	NA	NA	NA
LOC113727021	NA	NA	NA	NA	LOC113742296	NA	NA	NA	NA	LOC113697793	NA	NA	NA	NA	LOC113700003	NA	NA	NA	NA	LOC113708041	NA	NA	NA	NA
LOC113701899	NA	NA	NA	NA	LOC113705320	NA	NA	NA	NA	LOC113688023	NA	NA	NA	NA	LOC113707492	NA	NA	NA	NA	LOC113718022	NA	NA	NA	NA
LOC113708070	NA	NA	NA	NA	LOC113737074	NA	NA	NA	NA	LOC113722894	NA	NA	NA	NA	LOC113739568	NA	NA	NA	NA	LOC113713319	NA	NA	NA	NA
LOC113708583	NA	NA	NA	NA	LOC113689673	NA	NA	NA	NA	LOC113730102	NA	NA	NA	NA	LOC113719296	NA	NA	NA	NA	LOC113713086	NA	NA	NA	NA
LOC113698767	NA	NA	NA	NA	LOC113712957	NA	NA	NA	NA	LOC113701022	NA	NA	NA	NA	LOC113715564	NA	NA	NA	NA	LOC113715614	NA	NA	NA	NA
LOC113734638	NA	NA	NA	NA	LOC113702228	NA	NA	NA	NA	LOC113702185	NA	NA	NA	NA	LOC113712305	NA	NA	NA	NA	LOC113706818	NA	NA	NA	NA
LOC113704070	NA	NA	NA	NA	LOC113695988	NA	NA	NA	NA	LOC113718772	NA	NA	NA	NA	LOC113725344	NA	NA	NA	NA	LOC113725364	NA	NA	NA	NA
LOC113728129	NA	NA	NA	NA	LOC113694229	NA	NA	NA	NA	LOC113706960	NA	NA	NA	NA	LOC113697015	NA	NA	NA	NA	LOC113731026	NA	NA	NA	NA
LOC113700052	NA	NA	NA	NA	LOC113707484	NA	NA	NA	NA	LOC113742958	NA	NA	NA	NA	LOC113719104	NA	NA	NA	NA	LOC113702309	NA	NA	NA	NA
LOC113690713	NA	NA	NA	NA	LOC113692857	NA	NA	NA	NA	LOC113705360	NA	NA	NA	NA	LOC113697256	NA	NA	NA	NA	LOC113727282	NA	NA	NA	NA
LOC113729840	NA	NA	NA	NA	LOC113718685	NA	NA	NA	NA	LOC113737074	NA	NA	NA	NA	LOC113732554	NA	NA	NA	NA	LOC113703636	NA	NA	NA	NA
LOC113723008	NA	NA	NA	NA	LOC113716647	NA	NA	NA	NA	LOC113715427	NA	NA	NA	NA	LOC113691319	NA	NA	NA	NA	LOC113722998	NA	NA	NA	NA
LOC113698955	NA	NA	NA	NA	LOC113697193	NA	NA	NA	NA	LOC113731759	NA	NA	NA	NA	LOC113719660	NA	NA	NA	NA	LOC113719296	NA	NA	NA	NA
LOC113712372	NA	NA	NA	NA	LOC113731872	NA	NA	NA	NA	LOC113689673	NA	NA	NA	NA	LOC113712344	NA	NA	NA	NA	LOC113710737	NA	NA	NA	NA
LOC113706500	NA	NA	NA	NA	LOC113704026	NA	NA	NA	NA	LOC113694229	NA	NA	NA	NA	LOC113742558	NA	NA	NA	NA	LOC113694948	NA	NA	NA	NA
LOC113703548	NA	NA	NA	NA	LOC113740599	NA	NA	NA	NA	LOC113718685	NA	NA	NA	NA	LOC113737024	NA	NA	NA	NA	LOC113697015	NA	NA	NA	NA
LOC113731316	NA	NA	NA	NA	LOC113703842	NA	NA	NA	NA	LOC113733363	NA	NA	NA	NA	LOC113731070	NA	NA	NA	NA	LOC113712344	NA	NA	NA	NA
LOC113690982	NA	NA	NA	NA	LOC113708852	NA	NA	NA	NA	LOC113691665	NA	NA	NA	NA	LOC113726615	NA	NA	NA	NA	LOC113712386	NA	NA	NA	NA
LOC113710171	NA	NA	NA	NA	LOC113730265	NA	NA	NA	NA	LOC113698874	NA	NA	NA	NA	LOC113714709	NA	NA	NA	NA	LOC113725093	NA	NA	NA	NA
LOC113727690	NA	NA	NA	NA	LOC113732489	NA	NA	NA	NA	LOC113719698	NA	NA	NA	NA	LOC113693525	NA	NA	NA	NA	LOC113691026	NA	NA	NA	NA
LOC113716441	NA	NA	NA	NA	LOC113691421	NA	NA	NA	NA	LOC113734214	NA	NA	NA	NA	LOC113730980	NA	NA	NA	NA	LOC113731238	NA	NA	NA	NA
LOC113736605	NA	NA	NA	NA	LOC113727722	NA	NA	NA	NA	LOC113703842	NA	NA	NA	NA	LOC113726159	NA	NA	NA	NA	LOC113692399	NA	NA	NA	NA
LOC113731748	NA	NA	NA	NA	LOC113717404	NA	NA	NA	NA	LOC113708852	NA	NA	NA	NA	LOC113706847	NA	NA	NA	NA	LOC113731070	NA	NA	NA	NA
LOC113742889	NA	NA	NA	NA	LOC113712405	NA	NA	NA	NA	LOC113734562	NA	NA	NA	NA	LOC113741163	NA	NA	NA	NA	LOC113714709	NA	NA	NA	NA
LOC113703964	NA	NA	NA	NA	LOC113734774	NA	NA	NA	NA	LOC113716829	NA	NA	NA	NA	LOC113729930	NA	NA	NA	NA	LOC113726159	NA	NA	NA	NA
LOC113726795	NA	NA	NA	NA	LOC113693661	NA	NA	NA	NA	LOC113727266	NA	NA	NA	NA	LOC113726727	NA	NA	NA	NA	LOC113690970	NA	NA	NA	NA
LOC113696246	NA	NA	NA	NA	LOC113738679	NA	NA	NA	NA	LOC113741437	NA	NA	NA	NA	LOC113705411	NA	NA	NA	NA	LOC113712308	NA	NA	NA	NA
LOC113711689	NA	NA	NA	NA	LOC113742346	NA	NA	NA	NA	LOC113691421	NA	NA	NA	NA	LOC113712308	NA	NA	NA	NA	LOC113691562	NA	NA	NA	NA
LOC113734716	NA	NA	NA	NA	LOC113733013	NA	NA	NA	NA	LOC113725678	NA	NA	NA	NA	LOC113722862	NA	NA	NA	NA	LOC113722958	NA	NA	NA	NA
LOC113690778	NA	NA	NA	NA	LOC113731469	NA	NA	NA	NA	LOC113727722	NA	NA	NA	NA	LOC113734833	NA	NA	NA	NA	LOC113698933	NA	NA	NA	NA
LOC113704167	NA	NA	NA	NA	LOC113734472	NA	NA	NA	NA	LOC113734774	NA	NA	NA	NA	LOC113693734	NA	NA	NA	NA	LOC113726441	NA	NA	NA	NA
LOC113716686	NA	NA	NA	NA	LOC113690827	NA	NA	NA	NA	LOC113698922	NA	NA	NA	NA	LOC113691562	NA	NA	NA	NA	LOC113697505	NA	NA	NA	NA
LOC113703991	NA	NA	NA	NA	LOC113730021	NA	NA	NA	NA	LOC113701788	NA	NA	NA	NA	LOC113722958	NA	NA	NA	NA	LOC113727389	NA	NA	NA	NA
LOC113737866	NA	NA	NA	NA	LOC113704018	NA	NA	NA	NA	LOC113698367	NA	NA	NA	NA	LOC113742689	NA	NA	NA	NA	LOC113742635	NA	NA	NA	NA
LOC113705376	NA	NA	NA	NA	LOC113688044	NA	NA	NA	NA	LOC113693952	NA	NA	NA	NA	LOC113734008	NA	NA	NA	NA	LOC113701247	NA	NA	NA	NA
LOC113736582	NA	NA	NA	NA	LOC113702090	NA	NA	NA	NA	LOC113693077	NA	NA	NA	NA	LOC113738076	NA	NA	NA	NA	LOC113697108	NA	NA	NA	NA
LOC113700497	NA	NA	NA	NA	LOC113693640	NA	NA	NA	NA	LOC113690850	NA	NA	NA	NA	LOC113726441	NA	NA	NA	NA	LOC113690322	NA	NA	NA	NA
LOC113742560	NA	NA	NA	NA	LOC113687985	NA	NA	NA	NA	LOC113727090	NA	NA	NA	NA	LOC113727389	NA	NA	NA	NA	LOC113739679	NA	NA	NA	NA
LOC113716313	NA	NA	NA	NA	LOC113693077	NA	NA	NA	NA	LOC113740220	NA	NA	NA	NA	LOC113702465	NA	NA	NA	NA	LOC113719293	NA	NA	NA	NA
LOC113722671	NA	NA	NA	NA	LOC113690850	NA	NA	NA	NA	LOC113694938	NA	NA	NA	NA	LOC113742635	NA	NA	NA	NA	LOC113734766	NA	NA	NA	NA
LOC113702105	NA	NA	NA	NA	LOC113703218	NA	NA	NA	NA	LOC113699115	NA	NA	NA	NA	LOC113705575	NA	NA	NA	NA	LOC113701284	NA	NA	NA	NA
LOC113707935	NA	NA	NA	NA	LOC113724981	NA	NA	NA	NA	LOC113717327	NA	NA	NA	NA	LOC113740569	NA	NA	NA	NA	LOC113713592	NA	NA	NA	NA
LOC113737990	NA	NA	NA	NA	LOC113694938	NA	NA	NA	NA	LOC113717226	NA	NA	NA	NA	LOC113698713	NA	NA	NA	NA	LOC113732981	NA	NA	NA	NA
LOC113713371	NA	NA	NA	NA	LOC113717327	NA	NA	NA	NA	LOC113738739	NA	NA	NA	NA	LOC113703128	NA	NA	NA	NA	LOC113708580	NA	NA	NA	NA
LOC113704365	NA	NA	NA	NA	LOC113727502	NA	NA	NA	NA	LOC113742358	NA	NA	NA	NA	LOC113734528	NA	NA	NA	NA	LOC113717962	NA	NA	NA	NA
LOC113743298	NA	NA	NA	NA	LOC113726276	NA	NA	NA	NA	LOC113733842	NA	NA	NA	NA	LOC113739679	NA	NA	NA	NA	LOC113699336	NA	NA	NA	NA
LOC113699536	NA	NA	NA	NA	LOC113734930	NA	NA	NA	NA	LOC113742288	NA	NA	NA	NA	LOC113734766	NA	NA	NA	NA	LOC113713322	NA	NA	NA	NA
LOC113701832	NA	NA	NA	NA	LOC113698780	NA	NA	NA	NA	LOC113698716	NA	NA	NA	NA	LOC113702497	NA	NA	NA	NA	LOC113725339	NA	NA	NA	NA
LOC113730813	NA	NA	NA	NA	LOC113733842	NA	NA	NA	NA	LOC113729863	NA	NA	NA	NA	LOC113693881	NA	NA	NA	NA	LOC113688412	NA	NA	NA	NA
LOC113726495	NA	NA	NA	NA	LOC113708818	NA	NA	NA	NA	LOC113691409	NA	NA	NA	NA	LOC113701284	NA	NA	NA	NA	LOC113717877	NA	NA	NA	NA
LOC113727384	NA	NA	NA	NA	LOC113691557	NA	NA	NA	NA	LOC113727486	NA	NA	NA	NA	LOC113708580	NA	NA	NA	NA	LOC113717666	NA	NA	NA	NA
LOC113734031	NA	NA	NA	NA	LOC113726452	NA	NA	NA	NA	LOC113713155	NA	NA	NA	NA	LOC113725339	NA	NA	NA	NA	LOC113693904	NA	NA	NA	NA
LOC113742131	NA	NA	NA	NA	LOC113732535	NA	NA	NA	NA	LOC113732503	NA	NA	NA	NA	LOC113688412	NA	NA	NA	NA	LOC113734813	NA	NA	NA	NA
LOC113719000	NA	NA	NA	NA	LOC113710341	NA	NA	NA	NA	LOC113690331	NA	NA	NA	NA	LOC113717877	NA	NA	NA	NA	LOC113703902	NA	NA	NA	NA
LOC113740354	NA	NA	NA	NA	LOC113699064	NA	NA	NA	NA	LOC113691557	NA	NA	NA	NA	LOC113712735	NA	NA	NA	NA	LOC113741456	NA	NA	NA	NA
LOC113691908	NA	NA	NA	NA	LOC113712404	NA	NA	NA	NA	LOC113726452	NA	NA	NA	NA	LOC113717666	NA	NA	NA	NA	LOC113731037	NA	NA	NA	NA
LOC113710993	NA	NA	NA	NA	LOC113701570	NA	NA	NA	NA	LOC113732535	NA	NA	NA	NA	LOC113693904	NA	NA	NA	NA	LOC113716380	NA	NA	NA	NA
LOC113696175	NA	NA	NA	NA	LOC113725139	NA	NA	NA	NA	LOC113742172	NA	NA	NA	NA	LOC113703902	NA	NA	NA	NA	LOC113716397	NA	NA	NA	NA
LOC113716981	NA	NA	NA	NA	LOC113690566	NA	NA	NA	NA	LOC113710341	NA	NA	NA	NA	LOC113716397	NA	NA	NA	NA	LOC113703847	NA	NA	NA	NA
LOC113706743	NA	NA	NA	NA	LOC113701799	NA	NA	NA	NA	LOC113712404	NA	NA	NA	NA	LOC113703847	NA	NA	NA	NA	LOC113717151	NA	NA	NA	NA
LOC113731173	NA	NA	NA	NA	LOC113738021	NA	NA	NA	NA	LOC113731981	NA	NA	NA	NA	LOC113698098	NA	NA	NA	NA	LOC113691559	NA	NA	NA	NA
LOC113717425	NA	NA	NA	NA	LOC113722826	NA	NA	NA	NA	LOC113741422	NA	NA	NA	NA	LOC113739875	NA	NA	NA	NA	LOC113712562	NA	NA	NA	NA
LOC113708639	NA	NA	NA	NA	LOC113735924	NA	NA	NA	NA	LOC113698289	NA	NA	NA	NA	LOC113703402	NA	NA	NA	NA	LOC113734228	NA	NA	NA	NA
LOC113688218	NA	NA	NA	NA	LOC113717651	NA	NA	NA	NA	LOC113690253	NA	NA	NA	NA	LOC113734228	NA	NA	NA	NA	LOC113695941	NA	NA	NA	NA
LOC113698441	NA	NA	NA	NA	LOC113727268	NA	NA	NA	NA	LOC113732549	NA	NA	NA	NA	LOC113695941	NA	NA	NA	NA	LOC113734680	NA	NA	NA	NA
LOC113691388	NA	NA	NA	NA	LOC113699243	NA	NA	NA	NA	LOC113687970	NA	NA	NA	NA	LOC113730841	NA	NA	NA	NA	LOC113700968	NA	NA	NA	NA
LOC113739660	NA	NA	NA	NA	LOC113725495	NA	NA	NA	NA	LOC113714784	NA	NA	NA	NA	LOC113700968	NA	NA	NA	NA	LOC113727943	NA	NA	NA	NA
LOC113693741	NA	NA	NA	NA	LOC113709299	NA	NA	NA	NA	LOC113716790	NA	NA	NA	NA	LOC113725703	NA	NA	NA	NA	LOC113708849	NA	NA	NA	NA
LOC113713367	NA	NA	NA	NA	LOC113702337	NA	NA	NA	NA	LOC113716472	NA	NA	NA	NA	LOC113728033	NA	NA	NA	NA	LOC113714801	NA	NA	NA	NA
LOC113729892	NA	NA	NA	NA	LOC113726401	NA	NA	NA	NA	LOC113690836	NA	NA	NA	NA	LOC113714801	NA	NA	NA	NA	LOC113697165	NA	NA	NA	NA
LOC113734402	NA	NA	NA	NA	LOC113698602	NA	NA	NA	NA	LOC113738021	NA	NA	NA	NA	LOC113735307	NA	NA	NA	NA	LOC113742750	NA	NA	NA	NA
LOC113702383	NA	NA	NA	NA	LOC113725570	NA	NA	NA	NA	LOC113697138	NA	NA	NA	NA	LOC113708814	NA	NA	NA	NA	LOC113701653	NA	NA	NA	NA
LOC113707680	NA	NA	NA	NA	LOC113693638	NA	NA	NA	NA	LOC113722818	NA	NA	NA	NA	LOC113733739	NA	NA	NA	NA	LOC113728472	NA	NA	NA	NA
LOC113688242	NA	NA	NA	NA	LOC113697393	NA	NA	NA	NA	LOC113701678	NA	NA	NA	NA	LOC113707870	NA	NA	NA	NA	LOC113699328	NA	NA	NA	NA
LOC113695899	NA	NA	NA	NA	LOC113690200	NA	NA	NA	NA	LOC113735924	NA	NA	NA	NA	LOC113704367	NA	NA	NA	NA	LOC113707870	NA	NA	NA	NA
LOC113688854	NA	NA	NA	NA	LOC113719310	NA	NA	NA	NA	LOC113732017	NA	NA	NA	NA	LOC113734246	NA	NA	NA	NA	LOC113690849	NA	NA	NA	NA
LOC113712571	NA	NA	NA	NA	LOC113692598	NA	NA	NA	NA	LOC113705387	NA	NA	NA	NA	LOC113718034	NA	NA	NA	NA	LOC113701949	NA	NA	NA	NA
LOC113695534	NA	NA	NA	NA	LOC113742062	NA	NA	NA	NA	LOC113734061	NA	NA	NA	NA	LOC113712607	NA	NA	NA	NA	LOC113706368	NA	NA	NA	NA
LOC113701421	NA	NA	NA	NA	LOC113705632	NA	NA	NA	NA	LOC113727268	NA	NA	NA	NA	LOC113703931	NA	NA	NA	NA	LOC113734602	NA	NA	NA	NA
LOC113688511	NA	NA	NA	NA	LOC113726202	NA	NA	NA	NA	LOC113709299	NA	NA	NA	NA	LOC113698552	NA	NA	NA	NA	LOC113739556	NA	NA	NA	NA
LOC113708651	NA	NA	NA	NA	LOC113720383	NA	NA	NA	NA	LOC113702337	NA	NA	NA	NA	LOC113719006	NA	NA	NA	NA	LOC113734246	NA	NA	NA	NA
LOC113690888	NA	NA	NA	NA	LOC113731937	NA	NA	NA	NA	LOC113726401	NA	NA	NA	NA	LOC113726880	NA	NA	NA	NA	LOC113712517	NA	NA	NA	NA
LOC113707487	NA	NA	NA	NA	LOC113698270	NA	NA	NA	NA	LOC113726990	NA	NA	NA	NA	LOC113689940	NA	NA	NA	NA	LOC113712607	NA	NA	NA	NA
LOC113693923	NA	NA	NA	NA	LOC113693814	NA	NA	NA	NA	LOC113738129	NA	NA	NA	NA	LOC113722937	NA	NA	NA	NA	LOC113702103	NA	NA	NA	NA
LOC113710236	NA	NA	NA	NA	LOC113701779	NA	NA	NA	NA	LOC113742850	NA	NA	NA	NA	LOC113702212	NA	NA	NA	NA	LOC113703931	NA	NA	NA	NA
LOC113730295	NA	NA	NA	NA	LOC113727371	NA	NA	NA	NA	LOC113693638	NA	NA	NA	NA	LOC113712348	NA	NA	NA	NA	LOC113716696	NA	NA	NA	NA
LOC113714935	NA	NA	NA	NA	LOC113731627	NA	NA	NA	NA	LOC113697913	NA	NA	NA	NA	LOC113697100	NA	NA	NA	NA	LOC113736925	NA	NA	NA	NA
LOC113699174	NA	NA	NA	NA	LOC113709727	NA	NA	NA	NA	LOC113705051	NA	NA	NA	NA	LOC113710574	NA	NA	NA	NA	LOC113724355	NA	NA	NA	NA
LOC113702024	NA	NA	NA	NA	LOC113696210	NA	NA	NA	NA	LOC113697393	NA	NA	NA	NA	LOC113725056	NA	NA	NA	NA	LOC113732566	NA	NA	NA	NA
LOC113739891	NA	NA	NA	NA	LOC113715147	NA	NA	NA	NA	LOC113738221	NA	NA	NA	NA	LOC113743469	NA	NA	NA	NA	LOC113730793	NA	NA	NA	NA
LOC113693845	NA	NA	NA	NA	LOC113730025	NA	NA	NA	NA	LOC113694024	NA	NA	NA	NA	LOC113688959	NA	NA	NA	NA	LOC113732574	NA	NA	NA	NA
LOC113719177	NA	NA	NA	NA	LOC113707297	NA	NA	NA	NA	LOC113727702	NA	NA	NA	NA	LOC113741354	NA	NA	NA	NA	LOC113730358	NA	NA	NA	NA
LOC113699238	NA	NA	NA	NA	LOC113701598	NA	NA	NA	NA	LOC113692598	NA	NA	NA	NA	LOC113694805	NA	NA	NA	NA	LOC113735230	NA	NA	NA	NA
LOC113690907	NA	NA	NA	NA	LOC113722296	NA	NA	NA	NA	LOC113708664	NA	NA	NA	NA	LOC113724939	NA	NA	NA	NA	LOC113708700	NA	NA	NA	NA
LOC113710915	NA	NA	NA	NA	LOC113688762	NA	NA	NA	NA	LOC113742062	NA	NA	NA	NA	LOC113702389	NA	NA	NA	NA	LOC113725056	NA	NA	NA	NA
LOC113700127	NA	NA	NA	NA	LOC113695483	NA	NA	NA	NA	LOC113730458	NA	NA	NA	NA	LOC113692053	NA	NA	NA	NA	LOC113699244	NA	NA	NA	NA
LOC113724009	NA	NA	NA	NA	LOC113742695	NA	NA	NA	NA	LOC113701685	NA	NA	NA	NA	LOC113707882	NA	NA	NA	NA	LOC113708559	NA	NA	NA	NA
LOC113705796	NA	NA	NA	NA	LOC113728088	NA	NA	NA	NA	LOC113739635	NA	NA	NA	NA	LOC113731121	NA	NA	NA	NA	LOC113741354	NA	NA	NA	NA
LOC113714934	NA	NA	NA	NA	LOC113718688	NA	NA	NA	NA	LOC113731649	NA	NA	NA	NA	LOC113717221	NA	NA	NA	NA	LOC113722430	NA	NA	NA	NA
LOC113714359	NA	NA	NA	NA	LOC113713382	NA	NA	NA	NA	LOC113693814	NA	NA	NA	NA	LOC113730360	NA	NA	NA	NA	LOC113740002	NA	NA	NA	NA
LOC113718330	NA	NA	NA	NA	LOC113692823	NA	NA	NA	NA	LOC113690957	NA	NA	NA	NA	LOC113710561	NA	NA	NA	NA	LOC113715597	NA	NA	NA	NA
LOC113714842	NA	NA	NA	NA	LOC113719217	NA	NA	NA	NA	LOC113695981	NA	NA	NA	NA	LOC113699246	NA	NA	NA	NA	LOC113734542	NA	NA	NA	NA
LOC113734761	NA	NA	NA	NA	LOC113695974	NA	NA	NA	NA	LOC113710293	NA	NA	NA	NA	LOC113703730	NA	NA	NA	NA	LOC113694805	NA	NA	NA	NA
LOC113729891	NA	NA	NA	NA	LOC113735157	NA	NA	NA	NA	LOC113693573	NA	NA	NA	NA	LOC113734653	NA	NA	NA	NA	LOC113742387	NA	NA	NA	NA
LOC113739781	NA	NA	NA	NA	LOC113710909	NA	NA	NA	NA	LOC113725135	NA	NA	NA	NA	LOC113714775	NA	NA	NA	NA	LOC113736763	NA	NA	NA	NA
LOC113739605	NA	NA	NA	NA	LOC113719575	NA	NA	NA	NA	LOC113734110	NA	NA	NA	NA	LOC113707866	NA	NA	NA	NA	LOC113731121	NA	NA	NA	NA
LOC113718173	NA	NA	NA	NA	LOC113726950	NA	NA	NA	NA	LOC113727371	NA	NA	NA	NA	LOC113731251	NA	NA	NA	NA	LOC113736688	NA	NA	NA	NA
LOC113692988	NA	NA	NA	NA	LOC113695837	NA	NA	NA	NA	LOC113716877	NA	NA	NA	NA	LOC113694951	NA	NA	NA	NA	LOC113717221	NA	NA	NA	NA
LOC113694722	NA	NA	NA	NA	LOC113701859	NA	NA	NA	NA	LOC113714574	NA	NA	NA	NA	LOC113709449	NA	NA	NA	NA	LOC113710561	NA	NA	NA	NA
LOC113736712	NA	NA	NA	NA	LOC113690321	NA	NA	NA	NA	LOC113691369	NA	NA	NA	NA	LOC113717084	NA	NA	NA	NA	LOC113699246	NA	NA	NA	NA
LOC113719138	NA	NA	NA	NA	LOC113696031	NA	NA	NA	NA	LOC113714861	NA	NA	NA	NA	LOC113696106	NA	NA	NA	NA	LOC113733054	NA	NA	NA	NA
LOC113727018	NA	NA	NA	NA	LOC113714905	NA	NA	NA	NA	LOC113701598	NA	NA	NA	NA	LOC113694059	NA	NA	NA	NA	LOC113709449	NA	NA	NA	NA
LOC113742787	NA	NA	NA	NA	LOC113690460	NA	NA	NA	NA	LOC113728088	NA	NA	NA	NA	LOC113732462	NA	NA	NA	NA	LOC113699018	NA	NA	NA	NA
LOC113696178	NA	NA	NA	NA	LOC113731898	NA	NA	NA	NA	LOC113725464	NA	NA	NA	NA	LOC113732415	NA	NA	NA	NA	LOC113701798	NA	NA	NA	NA
LOC113688924	NA	NA	NA	NA	LOC113702001	NA	NA	NA	NA	LOC113711670	NA	NA	NA	NA	LOC113727253	NA	NA	NA	NA	LOC113692718	NA	NA	NA	NA
LOC113702007	NA	NA	NA	NA	LOC113701691	NA	NA	NA	NA	LOC113692823	NA	NA	NA	NA	LOC113701627	NA	NA	NA	NA	LOC113732462	NA	NA	NA	NA
LOC113707656	NA	NA	NA	NA	LOC113691446	NA	NA	NA	NA	LOC113734371	NA	NA	NA	NA	LOC113725018	NA	NA	NA	NA	LOC113697062	NA	NA	NA	NA
LOC113726477	NA	NA	NA	NA	LOC113707431	NA	NA	NA	NA	LOC113737462	NA	NA	NA	NA	LOC113704297	NA	NA	NA	NA	LOC113742566	NA	NA	NA	NA
LOC113704232	NA	NA	NA	NA	LOC113731102	NA	NA	NA	NA	LOC113719217	NA	NA	NA	NA	LOC113692876	NA	NA	NA	NA	LOC113732415	NA	NA	NA	NA
LOC113706864	NA	NA	NA	NA	LOC113710274	NA	NA	NA	NA	LOC113690367	NA	NA	NA	NA	LOC113698951	NA	NA	NA	NA	LOC113738143	NA	NA	NA	NA
LOC113719705	NA	NA	NA	NA	LOC113719674	NA	NA	NA	NA	LOC113738165	NA	NA	NA	NA	LOC113699197	NA	NA	NA	NA	LOC113740215	NA	NA	NA	NA
LOC113706528	NA	NA	NA	NA	LOC113736228	NA	NA	NA	NA	LOC113687263	NA	NA	NA	NA	LOC113704346	NA	NA	NA	NA	LOC113725018	NA	NA	NA	NA
LOC113729826	NA	NA	NA	NA	LOC113694188	NA	NA	NA	NA	LOC113726950	NA	NA	NA	NA	LOC113722300	NA	NA	NA	NA	LOC113731011	NA	NA	NA	NA
LOC113742596	NA	NA	NA	NA	LOC113728057	NA	NA	NA	NA	LOC113710523	NA	NA	NA	NA	LOC113715599	NA	NA	NA	NA	LOC113729940	NA	NA	NA	NA
LOC113725992	NA	NA	NA	NA	LOC113703620	NA	NA	NA	NA	LOC113695837	NA	NA	NA	NA	LOC113700256	NA	NA	NA	NA	LOC113733983	NA	NA	NA	NA
LOC113702914	NA	NA	NA	NA	LOC113730015	NA	NA	NA	NA	LOC113701859	NA	NA	NA	NA	LOC113709729	NA	NA	NA	NA	LOC113692876	NA	NA	NA	NA
LOC113725012	NA	NA	NA	NA	LOC113688136	NA	NA	NA	NA	LOC113715215	NA	NA	NA	NA	LOC113725253	NA	NA	NA	NA	LOC113726490	NA	NA	NA	NA
LOC113694837	NA	NA	NA	NA	LOC113697900	NA	NA	NA	NA	LOC113696031	NA	NA	NA	NA	LOC113699906	NA	NA	NA	NA	LOC113708910	NA	NA	NA	NA
LOC113690762	NA	NA	NA	NA	LOC113739584	NA	NA	NA	NA	LOC113714905	NA	NA	NA	NA	LOC113691579	NA	NA	NA	NA	LOC113695802	NA	NA	NA	NA
LOC113696048	NA	NA	NA	NA	LOC113702731	NA	NA	NA	NA	LOC113732987	NA	NA	NA	NA	LOC113712068	NA	NA	NA	NA	LOC113737032	NA	NA	NA	NA
LOC113725308	NA	NA	NA	NA	LOC113704318	NA	NA	NA	NA	LOC113701691	NA	NA	NA	NA	LOC113712286	NA	NA	NA	NA	LOC113725719	NA	NA	NA	NA
LOC113692629	NA	NA	NA	NA	LOC113733960	NA	NA	NA	NA	LOC113734800	NA	NA	NA	NA	LOC113741987	NA	NA	NA	NA	LOC113732780	NA	NA	NA	NA
LOC113688210	NA	NA	NA	NA	LOC113713683	NA	NA	NA	NA	LOC113691446	NA	NA	NA	NA	LOC113731555	NA	NA	NA	NA	LOC113710456	NA	NA	NA	NA
LOC113728012	NA	NA	NA	NA	LOC113710497	NA	NA	NA	NA	LOC113736656	NA	NA	NA	NA	LOC113692725	NA	NA	NA	NA	LOC113712068	NA	NA	NA	NA
LOC113699006	NA	NA	NA	NA	LOC113714878	NA	NA	NA	NA	LOC113709678	NA	NA	NA	NA	LOC113710490	NA	NA	NA	NA	LOC113741987	NA	NA	NA	NA
LOC113736602	NA	NA	NA	NA	LOC113700410	NA	NA	NA	NA	LOC113727409	NA	NA	NA	NA	LOC113714525	NA	NA	NA	NA	LOC113720833	NA	NA	NA	NA
LOC113697234	NA	NA	NA	NA	LOC113696985	NA	NA	NA	NA	LOC113713585	NA	NA	NA	NA	LOC113717088	NA	NA	NA	NA	LOC113702823	NA	NA	NA	NA
LOC113703465	NA	NA	NA	NA	LOC113725292	NA	NA	NA	NA	LOC113734183	NA	NA	NA	NA	LOC113699651	NA	NA	NA	NA	LOC113741580	NA	NA	NA	NA
LOC113712576	NA	NA	NA	NA	LOC113697365	NA	NA	NA	NA	LOC113695110	NA	NA	NA	NA	LOC113735144	NA	NA	NA	NA	LOC113710490	NA	NA	NA	NA
LOC113742785	NA	NA	NA	NA	LOC113741579	NA	NA	NA	NA	LOC113699303	NA	NA	NA	NA	LOC113740237	NA	NA	NA	NA	LOC113711048	NA	NA	NA	NA
LOC113743443	NA	NA	NA	NA	LOC113739694	NA	NA	NA	NA	LOC113736918	NA	NA	NA	NA	LOC113691709	NA	NA	NA	NA	LOC113714525	NA	NA	NA	NA
LOC113712272	NA	NA	NA	NA	LOC113731836	NA	NA	NA	NA	LOC113719235	NA	NA	NA	NA	LOC113711706	NA	NA	NA	NA	LOC113699651	NA	NA	NA	NA
LOC113742114	NA	NA	NA	NA	LOC113735115	NA	NA	NA	NA	LOC113728057	NA	NA	NA	NA	LOC113716837	NA	NA	NA	NA	LOC113710186	NA	NA	NA	NA
LOC113739558	NA	NA	NA	NA	LOC113715222	NA	NA	NA	NA	LOC113688136	NA	NA	NA	NA	LOC113703792	NA	NA	NA	NA	LOC113727815	NA	NA	NA	NA
LOC113703601	NA	NA	NA	NA	LOC113729970	NA	NA	NA	NA	LOC113734108	NA	NA	NA	NA	LOC113738575	NA	NA	NA	NA	LOC113740135	NA	NA	NA	NA
LOC113734503	NA	NA	NA	NA	LOC113699218	NA	NA	NA	NA	LOC113701277	NA	NA	NA	NA	LOC113717910	NA	NA	NA	NA	LOC113695629	NA	NA	NA	NA
LOC113690770	NA	NA	NA	NA	LOC113738428	NA	NA	NA	NA	LOC113698663	NA	NA	NA	NA	LOC113688937	NA	NA	NA	NA	LOC113708090	NA	NA	NA	NA
LOC113735802	NA	NA	NA	NA	LOC113699256	NA	NA	NA	NA	LOC113711662	NA	NA	NA	NA	LOC113697098	NA	NA	NA	NA	LOC113730148	NA	NA	NA	NA
LOC113726023	NA	NA	NA	NA	LOC113714543	NA	NA	NA	NA	LOC113704318	NA	NA	NA	NA	LOC113713782	NA	NA	NA	NA	LOC113703792	NA	NA	NA	NA
LOC113717440	NA	NA	NA	NA	LOC113713197	NA	NA	NA	NA	LOC113733960	NA	NA	NA	NA	LOC113704030	NA	NA	NA	NA	LOC113742826	NA	NA	NA	NA
LOC113725293	NA	NA	NA	NA	LOC113698470	NA	NA	NA	NA	LOC113709135	NA	NA	NA	NA	LOC113690601	NA	NA	NA	NA	LOC113727469	NA	NA	NA	NA
LOC113688098	NA	NA	NA	NA	LOC113711771	NA	NA	NA	NA	LOC113714322	NA	NA	NA	NA	LOC113728101	NA	NA	NA	NA	LOC113708091	NA	NA	NA	NA
LOC113726954	NA	NA	NA	NA	LOC113734545	NA	NA	NA	NA	LOC113735653	NA	NA	NA	NA	LOC113716712	NA	NA	NA	NA	LOC113722895	NA	NA	NA	NA
LOC113688550	NA	NA	NA	NA	LOC113714497	NA	NA	NA	NA	LOC113734803	NA	NA	NA	NA	LOC113703159	NA	NA	NA	NA	LOC113697098	NA	NA	NA	NA
LOC113729822	NA	NA	NA	NA	LOC113706905	NA	NA	NA	NA	LOC113710497	NA	NA	NA	NA	LOC113690764	NA	NA	NA	NA	LOC113713782	NA	NA	NA	NA
LOC113736264	NA	NA	NA	NA	LOC113742696	NA	NA	NA	NA	LOC113732207	NA	NA	NA	NA	LOC113729882	NA	NA	NA	NA	LOC113693719	NA	NA	NA	NA
LOC113711841	NA	NA	NA	NA	LOC113733966	NA	NA	NA	NA	LOC113725520	NA	NA	NA	NA	LOC113693964	NA	NA	NA	NA	LOC113740323	NA	NA	NA	NA
LOC113730370	NA	NA	NA	NA	LOC113687966	NA	NA	NA	NA	LOC113737143	NA	NA	NA	NA	LOC113697526	NA	NA	NA	NA	LOC113739575	NA	NA	NA	NA
LOC113705621	NA	NA	NA	NA	LOC113710385	NA	NA	NA	NA	LOC113700346	NA	NA	NA	NA	LOC113722967	NA	NA	NA	NA	LOC113708980	NA	NA	NA	NA
LOC113705841	NA	NA	NA	NA	LOC113730019	NA	NA	NA	NA	LOC113732573	NA	NA	NA	NA	LOC113740224	NA	NA	NA	NA	LOC113731584	NA	NA	NA	NA
LOC113714942	NA	NA	NA	NA	LOC113740011	NA	NA	NA	NA	LOC113728648	NA	NA	NA	NA	LOC113703546	NA	NA	NA	NA	LOC113690758	NA	NA	NA	NA
LOC113691543	NA	NA	NA	NA	LOC113711088	NA	NA	NA	NA	LOC113739861	NA	NA	NA	NA	LOC113740389	NA	NA	NA	NA	LOC113729882	NA	NA	NA	NA
LOC113701910	NA	NA	NA	NA	LOC113731298	NA	NA	NA	NA	LOC113727880	NA	NA	NA	NA	LOC113693919	NA	NA	NA	NA	LOC113697526	NA	NA	NA	NA
LOC113702264	NA	NA	NA	NA	LOC113718232	NA	NA	NA	NA	LOC113692763	NA	NA	NA	NA	LOC113693720	NA	NA	NA	NA	LOC113691630	NA	NA	NA	NA
LOC113710580	NA	NA	NA	NA	LOC113717269	NA	NA	NA	NA	LOC113715222	NA	NA	NA	NA	LOC113727016	NA	NA	NA	NA	LOC113711061	NA	NA	NA	NA
LOC113731941	NA	NA	NA	NA	LOC113717955	NA	NA	NA	NA	LOC113699412	NA	NA	NA	NA	LOC113723071	NA	NA	NA	NA	LOC113741399	NA	NA	NA	NA
LOC113692728	NA	NA	NA	NA	LOC113733819	NA	NA	NA	NA	LOC113729970	NA	NA	NA	NA	LOC113738106	NA	NA	NA	NA	LOC113740389	NA	NA	NA	NA
LOC113731855	NA	NA	NA	NA	LOC113696110	NA	NA	NA	NA	LOC113731458	NA	NA	NA	NA	LOC113734965	NA	NA	NA	NA	LOC113725636	NA	NA	NA	NA
LOC113703577	NA	NA	NA	NA	LOC113729408	NA	NA	NA	NA	LOC113725562	NA	NA	NA	NA	LOC113690844	NA	NA	NA	NA	LOC113693919	NA	NA	NA	NA
LOC113691280	NA	NA	NA	NA	LOC113731800	NA	NA	NA	NA	LOC113715424	NA	NA	NA	NA	LOC113705520	NA	NA	NA	NA	LOC113696979	NA	NA	NA	NA
LOC113736286	NA	NA	NA	NA	LOC113734637	NA	NA	NA	NA	LOC113703135	NA	NA	NA	NA	LOC113722933	NA	NA	NA	NA	LOC113723071	NA	NA	NA	NA
LOC113704333	NA	NA	NA	NA	LOC113699972	NA	NA	NA	NA	LOC113712921	NA	NA	NA	NA	LOC113695879	NA	NA	NA	NA	LOC113690844	NA	NA	NA	NA
LOC113734433	NA	NA	NA	NA	LOC113690875	NA	NA	NA	NA	LOC113698692	NA	NA	NA	NA	LOC113703514	NA	NA	NA	NA	LOC113726941	NA	NA	NA	NA
LOC113692528	NA	NA	NA	NA	LOC113703781	NA	NA	NA	NA	LOC113713197	NA	NA	NA	NA	LOC113708025	NA	NA	NA	NA	LOC113732575	NA	NA	NA	NA
LOC113712470	NA	NA	NA	NA	LOC113729338	NA	NA	NA	NA	LOC113738541	NA	NA	NA	NA	LOC113722738	NA	NA	NA	NA	LOC113706912	NA	NA	NA	NA
LOC113692833	NA	NA	NA	NA	LOC113725295	NA	NA	NA	NA	LOC113704134	NA	NA	NA	NA	LOC113732522	NA	NA	NA	NA	LOC113710405	NA	NA	NA	NA
LOC113691082	NA	NA	NA	NA	LOC113692372	NA	NA	NA	NA	LOC113711771	NA	NA	NA	NA	LOC113726620	NA	NA	NA	NA	LOC113708025	NA	NA	NA	NA
LOC113698341	NA	NA	NA	NA	LOC113694245	NA	NA	NA	NA	LOC113712671	NA	NA	NA	NA	LOC113733922	NA	NA	NA	NA	LOC113722738	NA	NA	NA	NA
LOC113733280	NA	NA	NA	NA	LOC113694784	NA	NA	NA	NA	LOC113690567	NA	NA	NA	NA	LOC113725022	NA	NA	NA	NA	LOC113700431	NA	NA	NA	NA
LOC113735202	NA	NA	NA	NA	LOC113727655	NA	NA	NA	NA	LOC113742696	NA	NA	NA	NA	LOC113733192	NA	NA	NA	NA	LOC113702894	NA	NA	NA	NA
LOC113742158	NA	NA	NA	NA	LOC113690736	NA	NA	NA	NA	LOC113733966	NA	NA	NA	NA	LOC113713417	NA	NA	NA	NA	LOC113725022	NA	NA	NA	NA
LOC113717727	NA	NA	NA	NA	LOC113695145	NA	NA	NA	NA	LOC113697369	NA	NA	NA	NA	LOC113729885	NA	NA	NA	NA	LOC113723434	NA	NA	NA	NA
LOC113733138	NA	NA	NA	NA	LOC113731545	NA	NA	NA	NA	LOC113727251	NA	NA	NA	NA	LOC113713851	NA	NA	NA	NA	LOC113706721	NA	NA	NA	NA
LOC113708694	NA	NA	NA	NA	LOC113707764	NA	NA	NA	NA	LOC113741761	NA	NA	NA	NA	LOC113690795	NA	NA	NA	NA	LOC113690655	NA	NA	NA	NA
LOC113732044	NA	NA	NA	NA	LOC113719637	NA	NA	NA	NA	LOC113732879	NA	NA	NA	NA	LOC113740401	NA	NA	NA	NA	LOC113696080	NA	NA	NA	NA
LOC113712665	NA	NA	NA	NA	LOC113695841	NA	NA	NA	NA	LOC113715633	NA	NA	NA	NA	LOC113696080	NA	NA	NA	NA	LOC113715479	NA	NA	NA	NA
LOC113732151	NA	NA	NA	NA	LOC113725506	NA	NA	NA	NA	LOC113698082	NA	NA	NA	NA	LOC113715057	NA	NA	NA	NA	LOC113704241	NA	NA	NA	NA
LOC113735255	NA	NA	NA	NA	LOC113724962	NA	NA	NA	NA	LOC113705397	NA	NA	NA	NA	LOC113725350	NA	NA	NA	NA	LOC113715057	NA	NA	NA	NA
LOC113691864	NA	NA	NA	NA	LOC113701006	NA	NA	NA	NA	LOC113696996	NA	NA	NA	NA	LOC113714625	NA	NA	NA	NA	LOC113687935	NA	NA	NA	NA
LOC113697300	NA	NA	NA	NA	LOC113738015	NA	NA	NA	NA	LOC113730855	NA	NA	NA	NA	LOC113696096	NA	NA	NA	NA	LOC113696096	NA	NA	NA	NA
LOC113715125	NA	NA	NA	NA	LOC113719186	NA	NA	NA	NA	LOC113734637	NA	NA	NA	NA	LOC113742900	NA	NA	NA	NA	LOC113705530	NA	NA	NA	NA
LOC113722174	NA	NA	NA	NA	LOC113696695	NA	NA	NA	NA	LOC113703781	NA	NA	NA	NA	LOC113732585	NA	NA	NA	NA	LOC113690449	NA	NA	NA	NA
LOC113708041	NA	NA	NA	NA	LOC113714815	NA	NA	NA	NA	LOC113726888	NA	NA	NA	NA	LOC113705530	NA	NA	NA	NA	LOC113724893	NA	NA	NA	NA
LOC113718022	NA	NA	NA	NA	LOC113716848	NA	NA	NA	NA	LOC113739964	NA	NA	NA	NA	LOC113691079	NA	NA	NA	NA	LOC113740033	NA	NA	NA	NA
LOC113725364	NA	NA	NA	NA	LOC113700115	NA	NA	NA	NA	LOC113725340	NA	NA	NA	NA	LOC113737069	NA	NA	NA	NA	LOC113742580	NA	NA	NA	NA
LOC113732887	NA	NA	NA	NA	LOC113711116	NA	NA	NA	NA	LOC113694784	NA	NA	NA	NA	LOC113694769	NA	NA	NA	NA	LOC113690577	NA	NA	NA	NA
LOC113696288	NA	NA	NA	NA	LOC113725116	NA	NA	NA	NA	LOC113727655	NA	NA	NA	NA	LOC113739578	NA	NA	NA	NA	LOC113715025	NA	NA	NA	NA
LOC113712500	NA	NA	NA	NA	LOC113694526	NA	NA	NA	NA	LOC113711655	NA	NA	NA	NA	LOC113733166	NA	NA	NA	NA	LOC113697464	NA	NA	NA	NA
LOC113688177	NA	NA	NA	NA	LOC113719483	NA	NA	NA	NA	LOC113695145	NA	NA	NA	NA	LOC113732256	NA	NA	NA	NA	LOC113719558	NA	NA	NA	NA
LOC113734679	NA	NA	NA	NA	LOC113729927	NA	NA	NA	NA	LOC113701790	NA	NA	NA	NA	LOC113734990	NA	NA	NA	NA	LOC113716493	NA	NA	NA	NA
LOC113712183	NA	NA	NA	NA	LOC113695652	NA	NA	NA	NA	LOC113730591	NA	NA	NA	NA	LOC113718721	NA	NA	NA	NA	LOC113743378	NA	NA	NA	NA
LOC113701698	NA	NA	NA	NA	LOC113716716	NA	NA	NA	NA	LOC113710864	NA	NA	NA	NA	LOC113694640	NA	NA	NA	NA	LOC113738150	NA	NA	NA	NA
LOC113742658	NA	NA	NA	NA	LOC113722789	NA	NA	NA	NA	LOC113719637	NA	NA	NA	NA	LOC113693873	NA	NA	NA	NA	LOC113701645	NA	NA	NA	NA
LOC113702309	NA	NA	NA	NA	LOC113696027	NA	NA	NA	NA	LOC113724962	NA	NA	NA	NA	LOC113712265	NA	NA	NA	NA	LOC113707379	NA	NA	NA	NA
LOC113699983	NA	NA	NA	NA	LOC113699686	NA	NA	NA	NA	LOC113730142	NA	NA	NA	NA	LOC113712315	NA	NA	NA	NA	LOC113704376	NA	NA	NA	NA
LOC113739816	NA	NA	NA	NA	LOC113725167	NA	NA	NA	NA	LOC113701006	NA	NA	NA	NA	LOC113702404	NA	NA	NA	NA	LOC113717246	NA	NA	NA	NA
LOC113722998	NA	NA	NA	NA	LOC113717695	NA	NA	NA	NA	LOC113733878	NA	NA	NA	NA	LOC113743378	NA	NA	NA	NA	LOC113694533	NA	NA	NA	NA
LOC113719296	NA	NA	NA	NA	LOC113718952	NA	NA	NA	NA	LOC113719186	NA	NA	NA	NA	LOC113690678	NA	NA	NA	NA	LOC113704117	NA	NA	NA	NA
LOC113725052	NA	NA	NA	NA	LOC113702229	NA	NA	NA	NA	LOC113728213	NA	NA	NA	NA	LOC113726605	NA	NA	NA	NA	LOC113713487	NA	NA	NA	NA
LOC113710737	NA	NA	NA	NA	LOC113724999	NA	NA	NA	NA	LOC113716848	NA	NA	NA	NA	LOC113701645	NA	NA	NA	NA	LOC113742195	NA	NA	NA	NA
LOC113715564	NA	NA	NA	NA	LOC113734339	NA	NA	NA	NA	LOC113714824	NA	NA	NA	NA	LOC113727865	NA	NA	NA	NA	LOC113699235	NA	NA	NA	NA
LOC113725344	NA	NA	NA	NA	LOC113736325	NA	NA	NA	NA	LOC113702767	NA	NA	NA	NA	LOC113699235	NA	NA	NA	NA	LOC113702712	NA	NA	NA	NA
LOC113739815	NA	NA	NA	NA	LOC113705500	NA	NA	NA	NA	LOC113725116	NA	NA	NA	NA	LOC113720205	NA	NA	NA	NA	LOC113724744	NA	NA	NA	NA
LOC113719104	NA	NA	NA	NA	LOC113718903	NA	NA	NA	NA	LOC113731062	NA	NA	NA	NA	LOC113702712	NA	NA	NA	NA	LOC113717183	NA	NA	NA	NA
LOC113709486	NA	NA	NA	NA	LOC113697488	NA	NA	NA	NA	LOC113692513	NA	NA	NA	NA	LOC113711452	NA	NA	NA	NA	LOC113743701	NA	NA	NA	NA
LOC113697256	NA	NA	NA	NA	LOC113742002	NA	NA	NA	NA	LOC113692275	NA	NA	NA	NA	LOC113702118	NA	NA	NA	NA	LOC113694904	NA	NA	NA	NA
LOC113730431	NA	NA	NA	NA	LOC113691392	NA	NA	NA	NA	LOC113688021	NA	NA	NA	NA	LOC113735814	NA	NA	NA	NA	LOC113727088	NA	NA	NA	NA
LOC113687980	NA	NA	NA	NA	LOC113702691	NA	NA	NA	NA	LOC113734235	NA	NA	NA	NA	LOC113743701	NA	NA	NA	NA	LOC113740178	NA	NA	NA	NA
LOC113719660	NA	NA	NA	NA	LOC113719571	NA	NA	NA	NA	LOC113699686	NA	NA	NA	NA	LOC113694904	NA	NA	NA	NA	LOC113712256	NA	NA	NA	NA
LOC113712344	NA	NA	NA	NA	LOC113698657	NA	NA	NA	NA	LOC113726280	NA	NA	NA	NA	LOC113703678	NA	NA	NA	NA	LOC113688201	NA	NA	NA	NA
LOC113742558	NA	NA	NA	NA	LOC113706408	NA	NA	NA	NA	LOC113690858	NA	NA	NA	NA	LOC113730835	NA	NA	NA	NA	LOC113706982	NA	NA	NA	NA
LOC113715675	NA	NA	NA	NA	LOC113707165	NA	NA	NA	NA	LOC113741757	NA	NA	NA	NA	LOC113734005	NA	NA	NA	NA	LOC113710588	NA	NA	NA	NA
LOC113737024	NA	NA	NA	NA	LOC113703860	NA	NA	NA	NA	LOC113738118	NA	NA	NA	NA	LOC113724953	NA	NA	NA	NA	LOC113712558	NA	NA	NA	NA
LOC113736373	NA	NA	NA	NA	LOC113719574	NA	NA	NA	NA	LOC113699124	NA	NA	NA	NA	LOC113710588	NA	NA	NA	NA	LOC113741032	NA	NA	NA	NA
LOC113711785	NA	NA	NA	NA	LOC113702668	NA	NA	NA	NA	LOC113698740	NA	NA	NA	NA	LOC113741571	NA	NA	NA	NA	LOC113701154	NA	NA	NA	NA
LOC113692399	NA	NA	NA	NA	LOC113698875	NA	NA	NA	NA	LOC113718802	NA	NA	NA	NA	LOC113727163	NA	NA	NA	NA	LOC113705283	NA	NA	NA	NA
LOC113727724	NA	NA	NA	NA	LOC113711911	NA	NA	NA	NA	LOC113696193	NA	NA	NA	NA	LOC113700524	NA	NA	NA	NA	LOC113695932	NA	NA	NA	NA
LOC113724164	NA	NA	NA	NA	LOC113714623	NA	NA	NA	NA	LOC113702229	NA	NA	NA	NA	LOC113690596	NA	NA	NA	NA	LOC113738142	NA	NA	NA	NA
LOC113741163	NA	NA	NA	NA	LOC113697021	NA	NA	NA	NA	LOC113714463	NA	NA	NA	NA	LOC113714767	NA	NA	NA	NA	LOC113725505	NA	NA	NA	NA
LOC113725066	NA	NA	NA	NA	LOC113726019	NA	NA	NA	NA	LOC113697552	NA	NA	NA	NA	LOC113734406	NA	NA	NA	NA	LOC113740353	NA	NA	NA	NA
LOC113729930	NA	NA	NA	NA	LOC113733021	NA	NA	NA	NA	LOC113734339	NA	NA	NA	NA	LOC113710837	NA	NA	NA	NA	LOC113719357	NA	NA	NA	NA
LOC113701854	NA	NA	NA	NA	LOC113736978	NA	NA	NA	NA	LOC113704195	NA	NA	NA	NA	LOC113724774	NA	NA	NA	NA	LOC113712451	NA	NA	NA	NA
LOC113712308	NA	NA	NA	NA	LOC113707875	NA	NA	NA	NA	LOC113699985	NA	NA	NA	NA	LOC113717233	NA	NA	NA	NA	LOC113731383	NA	NA	NA	NA
LOC113717160	NA	NA	NA	NA	LOC113733667	NA	NA	NA	NA	LOC113690872	NA	NA	NA	NA	LOC113725505	NA	NA	NA	NA	LOC113707229	NA	NA	NA	NA
LOC113691562	NA	NA	NA	NA	LOC113698020	NA	NA	NA	NA	LOC113741425	NA	NA	NA	NA	LOC113734350	NA	NA	NA	NA	LOC113691093	NA	NA	NA	NA
LOC113707023	NA	NA	NA	NA	LOC113739552	NA	NA	NA	NA	LOC113691649	NA	NA	NA	NA	LOC113719357	NA	NA	NA	NA	LOC113690677	NA	NA	NA	NA
LOC113722958	NA	NA	NA	NA	LOC113695673	NA	NA	NA	NA	LOC113732285	NA	NA	NA	NA	LOC113712451	NA	NA	NA	NA	LOC113732657	NA	NA	NA	NA
LOC113740195	NA	NA	NA	NA	LOC113701361	NA	NA	NA	NA	LOC113695952	NA	NA	NA	NA	LOC113731383	NA	NA	NA	NA	LOC113731080	NA	NA	NA	NA
LOC113702465	NA	NA	NA	NA	LOC113729777	NA	NA	NA	NA	LOC113715766	NA	NA	NA	NA	LOC113742105	NA	NA	NA	NA	LOC113709571	NA	NA	NA	NA
LOC113741740	NA	NA	NA	NA	LOC113742329	NA	NA	NA	NA	LOC113717143	NA	NA	NA	NA	LOC113711774	NA	NA	NA	NA	LOC113713262	NA	NA	NA	NA
LOC113701247	NA	NA	NA	NA	LOC113690047	NA	NA	NA	NA	LOC113700102	NA	NA	NA	NA	LOC113709571	NA	NA	NA	NA	LOC113731140	NA	NA	NA	NA
LOC113711659	NA	NA	NA	NA	LOC113697164	NA	NA	NA	NA	LOC113697085	NA	NA	NA	NA	LOC113742431	NA	NA	NA	NA	LOC113730103	NA	NA	NA	NA
LOC113741502	NA	NA	NA	NA	LOC113718918	NA	NA	NA	NA	LOC113694700	NA	NA	NA	NA	LOC113713262	NA	NA	NA	NA	LOC113736733	NA	NA	NA	NA
LOC113688060	NA	NA	NA	NA	LOC113712541	NA	NA	NA	NA	LOC113714442	NA	NA	NA	NA	LOC113730103	NA	NA	NA	NA	LOC113728824	NA	NA	NA	NA
LOC113742335	NA	NA	NA	NA	LOC113726679	NA	NA	NA	NA	LOC113705271	NA	NA	NA	NA	LOC113726886	NA	NA	NA	NA	LOC113728092	NA	NA	NA	NA
LOC113728146	NA	NA	NA	NA	LOC113736332	NA	NA	NA	NA	LOC113703860	NA	NA	NA	NA	LOC113712388	NA	NA	NA	NA	LOC113697957	NA	NA	NA	NA
LOC113739679	NA	NA	NA	NA	LOC113692685	NA	NA	NA	NA	LOC113710436	NA	NA	NA	NA	LOC113697957	NA	NA	NA	NA	LOC113739753	NA	NA	NA	NA
LOC113740200	NA	NA	NA	NA	LOC113742894	NA	NA	NA	NA	LOC113698875	NA	NA	NA	NA	LOC113715318	NA	NA	NA	NA	LOC113740156	NA	NA	NA	NA
LOC113710271	NA	NA	NA	NA	LOC113708903	NA	NA	NA	NA	LOC113708977	NA	NA	NA	NA	LOC113688029	NA	NA	NA	NA	LOC113729836	NA	NA	NA	NA
LOC113708815	NA	NA	NA	NA	LOC113695282	NA	NA	NA	NA	LOC113734297	NA	NA	NA	NA	LOC113707106	NA	NA	NA	NA	LOC113730554	NA	NA	NA	NA
LOC113735270	NA	NA	NA	NA	LOC113707414	NA	NA	NA	NA	LOC113706487	NA	NA	NA	NA	LOC113730554	NA	NA	NA	NA	LOC113742652	NA	NA	NA	NA
LOC113703724	NA	NA	NA	NA	LOC113730457	NA	NA	NA	NA	LOC113733021	NA	NA	NA	NA	LOC113690575	NA	NA	NA	NA	LOC113688058	NA	NA	NA	NA
LOC113707864	NA	NA	NA	NA	LOC113727619	NA	NA	NA	NA	LOC113707875	NA	NA	NA	NA	LOC113742226	NA	NA	NA	NA	LOC113714950	NA	NA	NA	NA
LOC113696977	NA	NA	NA	NA	LOC113694100	NA	NA	NA	NA	LOC113733667	NA	NA	NA	NA	LOC113736371	NA	NA	NA	NA	LOC113699048	NA	NA	NA	NA
LOC113712735	NA	NA	NA	NA	LOC113710552	NA	NA	NA	NA	LOC113688086	NA	NA	NA	NA	LOC113706747	NA	NA	NA	NA	LOC113690328	NA	NA	NA	NA
LOC113705612	NA	NA	NA	NA	LOC113732673	NA	NA	NA	NA	LOC113739552	NA	NA	NA	NA	LOC113717368	NA	NA	NA	NA	LOC113707488	NA	NA	NA	NA
LOC113716380	NA	NA	NA	NA	LOC113727956	NA	NA	NA	NA	LOC113701361	NA	NA	NA	NA	LOC113688329	NA	NA	NA	NA	LOC113738121	NA	NA	NA	NA
LOC113710676	NA	NA	NA	NA	LOC113718706	NA	NA	NA	NA	LOC113742329	NA	NA	NA	NA	LOC113699048	NA	NA	NA	NA	LOC113689024	NA	NA	NA	NA
LOC113716397	NA	NA	NA	NA	LOC113739670	NA	NA	NA	NA	LOC113729895	NA	NA	NA	NA	LOC113707488	NA	NA	NA	NA	LOC113733853	NA	NA	NA	NA
LOC113703847	NA	NA	NA	NA	LOC113698890	NA	NA	NA	NA	LOC113697118	NA	NA	NA	NA	LOC113734858	NA	NA	NA	NA	LOC113693801	NA	NA	NA	NA
LOC113698098	NA	NA	NA	NA	LOC113740251	NA	NA	NA	NA	LOC113697164	NA	NA	NA	NA	LOC113732777	NA	NA	NA	NA	LOC113727189	NA	NA	NA	NA
LOC113739875	NA	NA	NA	NA	LOC113730510	NA	NA	NA	NA	LOC113739557	NA	NA	NA	NA	LOC113701960	NA	NA	NA	NA	LOC113704388	NA	NA	NA	NA
LOC113719279	NA	NA	NA	NA	LOC113734756	NA	NA	NA	NA	LOC113730974	NA	NA	NA	NA	LOC113732542	NA	NA	NA	NA	LOC113699298	NA	NA	NA	NA
LOC113695124	NA	NA	NA	NA	LOC113690314	NA	NA	NA	NA	LOC113692685	NA	NA	NA	NA	LOC113693946	NA	NA	NA	NA	LOC113712304	NA	NA	NA	NA
LOC113741514	NA	NA	NA	NA	LOC113712926	NA	NA	NA	NA	LOC113742894	NA	NA	NA	NA	LOC113734398	NA	NA	NA	NA	LOC113701723	NA	NA	NA	NA
LOC113734228	NA	NA	NA	NA	LOC113708053	NA	NA	NA	NA	LOC113708903	NA	NA	NA	NA	LOC113732033	NA	NA	NA	NA	LOC113725429	NA	NA	NA	NA
LOC113734680	NA	NA	NA	NA	LOC113707356	NA	NA	NA	NA	LOC113704829	NA	NA	NA	NA	LOC113714782	NA	NA	NA	NA	LOC113697261	NA	NA	NA	NA
LOC113741182	NA	NA	NA	NA	LOC113710482	NA	NA	NA	NA	LOC113692694	NA	NA	NA	NA	LOC113730394	NA	NA	NA	NA	LOC113727936	NA	NA	NA	NA
LOC113730841	NA	NA	NA	NA	LOC113714581	NA	NA	NA	NA	LOC113695282	NA	NA	NA	NA	LOC113701723	NA	NA	NA	NA	LOC113722930	NA	NA	NA	NA
LOC113700968	NA	NA	NA	NA	LOC113698803	NA	NA	NA	NA	LOC113727685	NA	NA	NA	NA	LOC113697261	NA	NA	NA	NA	LOC113697793	NA	NA	NA	NA
LOC113725703	NA	NA	NA	NA	LOC113734253	NA	NA	NA	NA	LOC113701734	NA	NA	NA	NA	LOC113701740	NA	NA	NA	NA	LOC113699419	NA	NA	NA	NA
LOC113728033	NA	NA	NA	NA	LOC113723085	NA	NA	NA	NA	LOC113705374	NA	NA	NA	NA	LOC113740057	NA	NA	NA	NA	LOC113714201	NA	NA	NA	NA
LOC113727993	NA	NA	NA	NA	LOC113702690	NA	NA	NA	NA	LOC113730457	NA	NA	NA	NA	LOC113714201	NA	NA	NA	NA	LOC113742296	NA	NA	NA	NA
LOC113727943	NA	NA	NA	NA	LOC113719331	NA	NA	NA	NA	LOC113705873	NA	NA	NA	NA	LOC113722894	NA	NA	NA	NA	LOC113703170	NA	NA	NA	NA
LOC113708849	NA	NA	NA	NA	LOC113726690	NA	NA	NA	NA	LOC113728252	NA	NA	NA	NA	LOC113730587	NA	NA	NA	NA	LOC113701022	NA	NA	NA	NA
LOC113715722	NA	NA	NA	NA	LOC113709681	NA	NA	NA	NA	LOC113713291	NA	NA	NA	NA	LOC113742296	NA	NA	NA	NA	LOC113706960	NA	NA	NA	NA
LOC113701524	NA	NA	NA	NA	LOC113727220	NA	NA	NA	NA	LOC113743358	NA	NA	NA	NA	LOC113703170	NA	NA	NA	NA	LOC113697215	NA	NA	NA	NA
LOC113700066	NA	NA	NA	NA	LOC113704937	NA	NA	NA	NA	LOC113729214	NA	NA	NA	NA	LOC113701022	NA	NA	NA	NA	LOC113725712	NA	NA	NA	NA
LOC113691637	NA	NA	NA	NA	LOC113698871	NA	NA	NA	NA	LOC113730510	NA	NA	NA	NA	LOC113697057	NA	NA	NA	NA	LOC113714346	NA	NA	NA	NA
LOC113712249	NA	NA	NA	NA	LOC113718709	NA	NA	NA	NA	LOC113690314	NA	NA	NA	NA	LOC113706960	NA	NA	NA	NA	LOC113742958	NA	NA	NA	NA
LOC113690849	NA	NA	NA	NA	LOC113688849	NA	NA	NA	NA	LOC113730785	NA	NA	NA	NA	LOC113731177	NA	NA	NA	NA	LOC113688520	NA	NA	NA	NA
LOC113699506	NA	NA	NA	NA	LOC113699329	NA	NA	NA	NA	LOC113696108	NA	NA	NA	NA	LOC113688520	NA	NA	NA	NA	LOC113712170	NA	NA	NA	NA
LOC113708963	NA	NA	NA	NA	LOC113707205	NA	NA	NA	NA	LOC113698822	NA	NA	NA	NA	LOC113731616	NA	NA	NA	NA	LOC113737074	NA	NA	NA	NA
LOC113734602	NA	NA	NA	NA	LOC113715626	NA	NA	NA	NA	LOC113712926	NA	NA	NA	NA	LOC113737074	NA	NA	NA	NA	LOC113712957	NA	NA	NA	NA
LOC113707777	NA	NA	NA	NA	LOC113727141	NA	NA	NA	NA	LOC113736548	NA	NA	NA	NA	LOC113715427	NA	NA	NA	NA	LOC113702228	NA	NA	NA	NA
LOC113712607	NA	NA	NA	NA	LOC113732983	NA	NA	NA	NA	LOC113725706	NA	NA	NA	NA	LOC113702799	NA	NA	NA	NA	LOC113731696	NA	NA	NA	NA
LOC113702103	NA	NA	NA	NA	LOC113695212	NA	NA	NA	NA	LOC113707356	NA	NA	NA	NA	LOC113702228	NA	NA	NA	NA	LOC113741328	NA	NA	NA	NA
LOC113716696	NA	NA	NA	NA	LOC113717125	NA	NA	NA	NA	LOC113733711	NA	NA	NA	NA	LOC113726780	NA	NA	NA	NA	LOC113708617	NA	NA	NA	NA
LOC113736925	NA	NA	NA	NA	LOC113725649	NA	NA	NA	NA	LOC113710482	NA	NA	NA	NA	LOC113708617	NA	NA	NA	NA	LOC113736267	NA	NA	NA	NA
LOC113698552	NA	NA	NA	NA	LOC113730061	NA	NA	NA	NA	LOC113692678	NA	NA	NA	NA	LOC113733907	NA	NA	NA	NA	LOC113716944	NA	NA	NA	NA
LOC113732574	NA	NA	NA	NA	LOC113710320	NA	NA	NA	NA	LOC113734270	NA	NA	NA	NA	LOC113708039	NA	NA	NA	NA	LOC113708039	NA	NA	NA	NA
LOC113689940	NA	NA	NA	NA	LOC113726513	NA	NA	NA	NA	LOC113714581	NA	NA	NA	NA	LOC113707484	NA	NA	NA	NA	LOC113712065	NA	NA	NA	NA
LOC113733130	NA	NA	NA	NA	LOC113728128	NA	NA	NA	NA	LOC113708605	NA	NA	NA	NA	LOC113733363	NA	NA	NA	NA	LOC113692857	NA	NA	NA	NA
LOC113743469	NA	NA	NA	NA	LOC113697078	NA	NA	NA	NA	LOC113698803	NA	NA	NA	NA	LOC113708592	NA	NA	NA	NA	LOC113718685	NA	NA	NA	NA
LOC113724554	NA	NA	NA	NA	LOC113713025	NA	NA	NA	NA	LOC113723085	NA	NA	NA	NA	LOC113719698	NA	NA	NA	NA	LOC113705457	NA	NA	NA	NA
LOC113722430	NA	NA	NA	NA	LOC113708917	NA	NA	NA	NA	LOC113702796	NA	NA	NA	NA	LOC113734214	NA	NA	NA	NA	LOC113714894	NA	NA	NA	NA
LOC113703599	NA	NA	NA	NA	LOC113742544	NA	NA	NA	NA	LOC113709681	NA	NA	NA	NA	LOC113717216	NA	NA	NA	NA	LOC113689714	NA	NA	NA	NA
LOC113726849	NA	NA	NA	NA	LOC113716779	NA	NA	NA	NA	LOC113727220	NA	NA	NA	NA	LOC113740599	NA	NA	NA	NA	LOC113697087	NA	NA	NA	NA
LOC113734542	NA	NA	NA	NA	LOC113712790	NA	NA	NA	NA	LOC113706732	NA	NA	NA	NA	LOC113732651	NA	NA	NA	NA	LOC113688648	NA	NA	NA	NA
LOC113734763	NA	NA	NA	NA	LOC113742230	NA	NA	NA	NA	LOC113725430	NA	NA	NA	NA	LOC113714448	NA	NA	NA	NA	LOC113698874	NA	NA	NA	NA
LOC113742387	NA	NA	NA	NA	LOC113688290	NA	NA	NA	NA	LOC113704937	NA	NA	NA	NA	LOC113717139	NA	NA	NA	NA	LOC113719698	NA	NA	NA	NA
LOC113724939	NA	NA	NA	NA	LOC113726706	NA	NA	NA	NA	LOC113688849	NA	NA	NA	NA	LOC113741437	NA	NA	NA	NA	LOC113708852	NA	NA	NA	NA
LOC113724192	NA	NA	NA	NA	LOC113724796	NA	NA	NA	NA	LOC113699329	NA	NA	NA	NA	LOC113706691	NA	NA	NA	NA	LOC113714448	NA	NA	NA	NA
LOC113730238	NA	NA	NA	NA	LOC113690643	NA	NA	NA	NA	LOC113715626	NA	NA	NA	NA	LOC113708111	NA	NA	NA	NA	LOC113717139	NA	NA	NA	NA
LOC113731121	NA	NA	NA	NA	LOC113697897	NA	NA	NA	NA	LOC113732983	NA	NA	NA	NA	LOC113734774	NA	NA	NA	NA	LOC113712405	NA	NA	NA	NA
LOC113727299	NA	NA	NA	NA	LOC113696944	NA	NA	NA	NA	LOC113730720	NA	NA	NA	NA	LOC113719408	NA	NA	NA	NA	LOC113731528	NA	NA	NA	NA
LOC113691330	NA	NA	NA	NA	LOC113712319	NA	NA	NA	NA	LOC113695030	NA	NA	NA	NA	LOC113703031	NA	NA	NA	NA	LOC113727305	NA	NA	NA	NA
LOC113730360	NA	NA	NA	NA	LOC113703783	NA	NA	NA	NA	LOC113693700	NA	NA	NA	NA	LOC113738679	NA	NA	NA	NA	LOC113734774	NA	NA	NA	NA
LOC113708027	NA	NA	NA	NA	LOC113702422	NA	NA	NA	NA	LOC113701223	NA	NA	NA	NA	LOC113742346	NA	NA	NA	NA	LOC113719408	NA	NA	NA	NA
LOC113699246	NA	NA	NA	NA	LOC113712805	NA	NA	NA	NA	LOC113730061	NA	NA	NA	NA	LOC113740013	NA	NA	NA	NA	LOC113693661	NA	NA	NA	NA
LOC113703730	NA	NA	NA	NA	LOC113731842	NA	NA	NA	NA	LOC113731179	NA	NA	NA	NA	LOC113714763	NA	NA	NA	NA	LOC113712135	NA	NA	NA	NA
LOC113733054	NA	NA	NA	NA	LOC113725716	NA	NA	NA	NA	LOC113708901	NA	NA	NA	NA	LOC113713633	NA	NA	NA	NA	LOC113739950	NA	NA	NA	NA
LOC113709990	NA	NA	NA	NA	LOC113727590	NA	NA	NA	NA	LOC113739708	NA	NA	NA	NA	LOC113694182	NA	NA	NA	NA	LOC113690565	NA	NA	NA	NA
LOC113732778	NA	NA	NA	NA	LOC113693762	NA	NA	NA	NA	LOC113704091	NA	NA	NA	NA	LOC113717782	NA	NA	NA	NA	LOC113742679	NA	NA	NA	NA
LOC113691132	NA	NA	NA	NA	LOC113717963	NA	NA	NA	NA	LOC113734874	NA	NA	NA	NA	LOC113739950	NA	NA	NA	NA	LOC113739666	NA	NA	NA	NA
LOC113696251	NA	NA	NA	NA	LOC113697006	NA	NA	NA	NA	LOC113719066	NA	NA	NA	NA	LOC113742679	NA	NA	NA	NA	LOC113691881	NA	NA	NA	NA
LOC113709449	NA	NA	NA	NA	LOC113731925	NA	NA	NA	NA	LOC113687969	NA	NA	NA	NA	LOC113739666	NA	NA	NA	NA	LOC113690827	NA	NA	NA	NA
LOC113699018	NA	NA	NA	NA	LOC113706737	NA	NA	NA	NA	LOC113716779	NA	NA	NA	NA	LOC113717035	NA	NA	NA	NA	LOC113730039	NA	NA	NA	NA
LOC113717080	NA	NA	NA	NA	LOC113694612	NA	NA	NA	NA	LOC113712787	NA	NA	NA	NA	LOC113693952	NA	NA	NA	NA	LOC113714367	NA	NA	NA	NA
LOC113728674	NA	NA	NA	NA	LOC113737967	NA	NA	NA	NA	LOC113730756	NA	NA	NA	NA	LOC113715226	NA	NA	NA	NA	LOC113742059	NA	NA	NA	NA
LOC113717620	NA	NA	NA	NA	LOC113738008	NA	NA	NA	NA	LOC113712683	NA	NA	NA	NA	LOC113725577	NA	NA	NA	NA	LOC113710642	NA	NA	NA	NA
LOC113717084	NA	NA	NA	NA	LOC113736880	NA	NA	NA	NA	LOC113696944	NA	NA	NA	NA	LOC113710204	NA	NA	NA	NA	LOC113702764	NA	NA	NA	NA
LOC113740349	NA	NA	NA	NA	LOC113698669	NA	NA	NA	NA	LOC113725665	NA	NA	NA	NA	LOC113714367	NA	NA	NA	NA	LOC113702090	NA	NA	NA	NA
LOC113692718	NA	NA	NA	NA	LOC113717310	NA	NA	NA	NA	LOC113737227	NA	NA	NA	NA	LOC113699104	NA	NA	NA	NA	LOC113687985	NA	NA	NA	NA
LOC113698339	NA	NA	NA	NA	LOC113719269	NA	NA	NA	NA	LOC113692107	NA	NA	NA	NA	LOC113693640	NA	NA	NA	NA	LOC113703482	NA	NA	NA	NA
LOC113707286	NA	NA	NA	NA	LOC113711001	NA	NA	NA	NA	LOC113702422	NA	NA	NA	NA	LOC113693077	NA	NA	NA	NA	LOC113740220	NA	NA	NA	NA
LOC113699952	NA	NA	NA	NA	LOC113736520	NA	NA	NA	NA	LOC113717555	NA	NA	NA	NA	LOC113712864	NA	NA	NA	NA	LOC113741673	NA	NA	NA	NA
LOC113731907	NA	NA	NA	NA	LOC113697070	NA	NA	NA	NA	LOC113726533	NA	NA	NA	NA	LOC113727090	NA	NA	NA	NA	LOC113724981	NA	NA	NA	NA
LOC113690395	NA	NA	NA	NA	LOC113708514	NA	NA	NA	NA	LOC113712805	NA	NA	NA	NA	LOC113740220	NA	NA	NA	NA	LOC113742285	NA	NA	NA	NA
LOC113702078	NA	NA	NA	NA	LOC113710181	NA	NA	NA	NA	LOC113731842	NA	NA	NA	NA	LOC113741673	NA	NA	NA	NA	LOC113714579	NA	NA	NA	NA
LOC113736793	NA	NA	NA	NA	LOC113738160	NA	NA	NA	NA	LOC113727590	NA	NA	NA	NA	LOC113690781	NA	NA	NA	NA	LOC113699115	NA	NA	NA	NA
LOC113697062	NA	NA	NA	NA	LOC113734384	NA	NA	NA	NA	LOC113697006	NA	NA	NA	NA	LOC113694938	NA	NA	NA	NA	LOC113703138	NA	NA	NA	NA
LOC113742206	NA	NA	NA	NA	LOC113732109	NA	NA	NA	NA	LOC113706737	NA	NA	NA	NA	LOC113699115	NA	NA	NA	NA	LOC113711564	NA	NA	NA	NA
LOC113716309	NA	NA	NA	NA	LOC113701012	NA	NA	NA	NA	LOC113694612	NA	NA	NA	NA	LOC113711564	NA	NA	NA	NA	LOC113697576	NA	NA	NA	NA
LOC113692560	NA	NA	NA	NA	LOC113694891	NA	NA	NA	NA	LOC113725173	NA	NA	NA	NA	LOC113717327	NA	NA	NA	NA	LOC113741888	NA	NA	NA	NA
LOC113742566	NA	NA	NA	NA	LOC113740176	NA	NA	NA	NA	LOC113691065	NA	NA	NA	NA	LOC113727502	NA	NA	NA	NA	LOC113725664	NA	NA	NA	NA
LOC113738609	NA	NA	NA	NA	LOC113694789	NA	NA	NA	NA	LOC113740287	NA	NA	NA	NA	LOC113717226	NA	NA	NA	NA	LOC113741443	NA	NA	NA	NA
LOC113708766	NA	NA	NA	NA	LOC113727570	NA	NA	NA	NA	LOC113697368	NA	NA	NA	NA	LOC113741888	NA	NA	NA	NA	LOC113734930	NA	NA	NA	NA
LOC113696100	NA	NA	NA	NA	LOC113694516	NA	NA	NA	NA	LOC113738554	NA	NA	NA	NA	LOC113725664	NA	NA	NA	NA	LOC113698780	NA	NA	NA	NA
LOC113703578	NA	NA	NA	NA	LOC113725254	NA	NA	NA	NA	LOC113691683	NA	NA	NA	NA	LOC113716633	NA	NA	NA	NA	LOC113727336	NA	NA	NA	NA
LOC113713584	NA	NA	NA	NA	LOC113701615	NA	NA	NA	NA	LOC113736520	NA	NA	NA	NA	LOC113698780	NA	NA	NA	NA	LOC113722439	NA	NA	NA	NA
LOC113697871	NA	NA	NA	NA	LOC113712937	NA	NA	NA	NA	LOC113703114	NA	NA	NA	NA	LOC113726942	NA	NA	NA	NA	LOC113698716	NA	NA	NA	NA
LOC113727840	NA	NA	NA	NA	LOC113709278	NA	NA	NA	NA	LOC113710181	NA	NA	NA	NA	LOC113696186	NA	NA	NA	NA	LOC113708818	NA	NA	NA	NA
LOC113725170	NA	NA	NA	NA	LOC113699017	NA	NA	NA	NA	LOC113701881	NA	NA	NA	NA	LOC113732699	NA	NA	NA	NA	LOC113732535	NA	NA	NA	NA
LOC113740215	NA	NA	NA	NA	LOC113733843	NA	NA	NA	NA	LOC113736048	NA	NA	NA	NA	LOC113690634	NA	NA	NA	NA	LOC113696838	NA	NA	NA	NA
LOC113698951	NA	NA	NA	NA	LOC113706956	NA	NA	NA	NA	LOC113711005	NA	NA	NA	NA	LOC113698716	NA	NA	NA	NA	LOC113710341	NA	NA	NA	NA
LOC113687950	NA	NA	NA	NA	LOC113706844	NA	NA	NA	NA	LOC113734384	NA	NA	NA	NA	LOC113742637	NA	NA	NA	NA	LOC113713829	NA	NA	NA	NA
LOC113699197	NA	NA	NA	NA	LOC113712309	NA	NA	NA	NA	LOC113738205	NA	NA	NA	NA	LOC113708818	NA	NA	NA	NA	LOC113712404	NA	NA	NA	NA
LOC113726490	NA	NA	NA	NA	LOC113698963	NA	NA	NA	NA	LOC113688107	NA	NA	NA	NA	LOC113732503	NA	NA	NA	NA	LOC113712979	NA	NA	NA	NA
LOC113699282	NA	NA	NA	NA	LOC113727624	NA	NA	NA	NA	LOC113740176	NA	NA	NA	NA	LOC113691557	NA	NA	NA	NA	LOC113697843	NA	NA	NA	NA
LOC113704346	NA	NA	NA	NA	LOC113734288	NA	NA	NA	NA	LOC113699931	NA	NA	NA	NA	LOC113726083	NA	NA	NA	NA	LOC113691681	NA	NA	NA	NA
LOC113695802	NA	NA	NA	NA	LOC113717148	NA	NA	NA	NA	LOC113695078	NA	NA	NA	NA	LOC113710341	NA	NA	NA	NA	LOC113742228	NA	NA	NA	NA
LOC113710511	NA	NA	NA	NA	LOC113730716	NA	NA	NA	NA	LOC113734051	NA	NA	NA	NA	LOC113712404	NA	NA	NA	NA	LOC113708653	NA	NA	NA	NA
LOC113725934	NA	NA	NA	NA	LOC113731226	NA	NA	NA	NA	LOC113701615	NA	NA	NA	NA	LOC113698289	NA	NA	NA	NA	LOC113728009	NA	NA	NA	NA
LOC113699080	NA	NA	NA	NA	LOC113726594	NA	NA	NA	NA	LOC113712937	NA	NA	NA	NA	LOC113714784	NA	NA	NA	NA	LOC113697207	NA	NA	NA	NA
LOC113716335	NA	NA	NA	NA	NA	NA	NA	NA	NA	LOC113698689	NA	NA	NA	NA	LOC113712979	NA	NA	NA	NA	LOC113727723	NA	NA	NA	NA
LOC113725967	NA	NA	NA	NA	NA	NA	NA	NA	NA	LOC113706844	NA	NA	NA	NA	LOC113690566	NA	NA	NA	NA	LOC113734061	NA	NA	NA	NA
LOC113737032	NA	NA	NA	NA	NA	NA	NA	NA	NA	LOC113712309	NA	NA	NA	NA	LOC113701799	NA	NA	NA	NA	LOC113709299	NA	NA	NA	NA
LOC113700256	NA	NA	NA	NA	NA	NA	NA	NA	NA	LOC113731866	NA	NA	NA	NA	LOC113708653	NA	NA	NA	NA	LOC113702337	NA	NA	NA	NA
LOC113728025	NA	NA	NA	NA	NA	NA	NA	NA	NA	LOC113690214	NA	NA	NA	NA	LOC113705387	NA	NA	NA	NA	LOC113691957	NA	NA	NA	NA
LOC113725719	NA	NA	NA	NA	NA	NA	NA	NA	NA	LOC113732465	NA	NA	NA	NA	LOC113717651	NA	NA	NA	NA	LOC113705051	NA	NA	NA	NA
LOC113714482	NA	NA	NA	NA	NA	NA	NA	NA	NA	LOC113733305	NA	NA	NA	NA	LOC113734061	NA	NA	NA	NA	LOC113702932	NA	NA	NA	NA
LOC113690896	NA	NA	NA	NA	NA	NA	NA	NA	NA	LOC113707759	NA	NA	NA	NA	LOC113739692	NA	NA	NA	NA	LOC113712339	NA	NA	NA	NA
LOC113694076	NA	NA	NA	NA	NA	NA	NA	NA	NA	LOC113719088	NA	NA	NA	NA	LOC113709299	NA	NA	NA	NA	LOC113690200	NA	NA	NA	NA
LOC113712068	NA	NA	NA	NA	NA	NA	NA	NA	NA	LOC113731226	NA	NA	NA	NA	LOC113726401	NA	NA	NA	NA	LOC113730426	NA	NA	NA	NA
LOC113712286	NA	NA	NA	NA	NA	NA	NA	NA	NA	NA	NA	NA	NA	NA	LOC113726990	NA	NA	NA	NA	LOC113727702	NA	NA	NA	NA
LOC113706866	NA	NA	NA	NA	NA	NA	NA	NA	NA	NA	NA	NA	NA	NA	LOC113693638	NA	NA	NA	NA	LOC113742062	NA	NA	NA	NA
LOC113706759	NA	NA	NA	NA	NA	NA	NA	NA	NA	NA	NA	NA	NA	NA	LOC113702932	NA	NA	NA	NA	LOC113694682	NA	NA	NA	NA
LOC113689963	NA	NA	NA	NA	NA	NA	NA	NA	NA	NA	NA	NA	NA	NA	LOC113738221	NA	NA	NA	NA	LOC113691365	NA	NA	NA	NA
LOC113714507	NA	NA	NA	NA	NA	NA	NA	NA	NA	NA	NA	NA	NA	NA	LOC113703640	NA	NA	NA	NA	LOC113729915	NA	NA	NA	NA
LOC113702279	NA	NA	NA	NA	NA	NA	NA	NA	NA	NA	NA	NA	NA	NA	LOC113742062	NA	NA	NA	NA	LOC113699858	NA	NA	NA	NA
LOC113702140	NA	NA	NA	NA	NA	NA	NA	NA	NA	NA	NA	NA	NA	NA	LOC113726854	NA	NA	NA	NA	LOC113702297	NA	NA	NA	NA
LOC113702823	NA	NA	NA	NA	NA	NA	NA	NA	NA	NA	NA	NA	NA	NA	LOC113689738	NA	NA	NA	NA	LOC113726854	NA	NA	NA	NA
LOC113710490	NA	NA	NA	NA	NA	NA	NA	NA	NA	NA	NA	NA	NA	NA	LOC113742610	NA	NA	NA	NA	LOC113690490	NA	NA	NA	NA
LOC113714525	NA	NA	NA	NA	NA	NA	NA	NA	NA	NA	NA	NA	NA	NA	LOC113726202	NA	NA	NA	NA	LOC113726202	NA	NA	NA	NA
LOC113717088	NA	NA	NA	NA	NA	NA	NA	NA	NA	NA	NA	NA	NA	NA	LOC113739635	NA	NA	NA	NA	LOC113703414	NA	NA	NA	NA
LOC113713068	NA	NA	NA	NA	NA	NA	NA	NA	NA	NA	NA	NA	NA	NA	LOC113731649	NA	NA	NA	NA	LOC113720383	NA	NA	NA	NA
LOC113735144	NA	NA	NA	NA	NA	NA	NA	NA	NA	NA	NA	NA	NA	NA	LOC113739930	NA	NA	NA	NA	LOC113725731	NA	NA	NA	NA
LOC113710186	NA	NA	NA	NA	NA	NA	NA	NA	NA	NA	NA	NA	NA	NA	LOC113719139	NA	NA	NA	NA	LOC113728017	NA	NA	NA	NA
LOC113742911	NA	NA	NA	NA	NA	NA	NA	NA	NA	NA	NA	NA	NA	NA	LOC113710133	NA	NA	NA	NA	LOC113719139	NA	NA	NA	NA
LOC113717723	NA	NA	NA	NA	NA	NA	NA	NA	NA	NA	NA	NA	NA	NA	LOC113693814	NA	NA	NA	NA	LOC113734226	NA	NA	NA	NA
LOC113732521	NA	NA	NA	NA	NA	NA	NA	NA	NA	NA	NA	NA	NA	NA	LOC113728833	NA	NA	NA	NA	LOC113693814	NA	NA	NA	NA
LOC113714044	NA	NA	NA	NA	NA	NA	NA	NA	NA	NA	NA	NA	NA	NA	LOC113695981	NA	NA	NA	NA	LOC113710293	NA	NA	NA	NA
LOC113701037	NA	NA	NA	NA	NA	NA	NA	NA	NA	NA	NA	NA	NA	NA	LOC113693573	NA	NA	NA	NA	LOC113692786	NA	NA	NA	NA
LOC113740237	NA	NA	NA	NA	NA	NA	NA	NA	NA	NA	NA	NA	NA	NA	LOC113742513	NA	NA	NA	NA	LOC113712761	NA	NA	NA	NA
LOC113708090	NA	NA	NA	NA	NA	NA	NA	NA	NA	NA	NA	NA	NA	NA	LOC113712761	NA	NA	NA	NA	LOC113708699	NA	NA	NA	NA
LOC113691709	NA	NA	NA	NA	NA	NA	NA	NA	NA	NA	NA	NA	NA	NA	LOC113734110	NA	NA	NA	NA	LOC113727371	NA	NA	NA	NA
LOC113716837	NA	NA	NA	NA	NA	NA	NA	NA	NA	NA	NA	NA	NA	NA	LOC113727371	NA	NA	NA	NA	LOC113718728	NA	NA	NA	NA
LOC113694141	NA	NA	NA	NA	NA	NA	NA	NA	NA	NA	NA	NA	NA	NA	LOC113696210	NA	NA	NA	NA	LOC113691369	NA	NA	NA	NA
LOC113725928	NA	NA	NA	NA	NA	NA	NA	NA	NA	NA	NA	NA	NA	NA	LOC113730025	NA	NA	NA	NA	LOC113727574	NA	NA	NA	NA
LOC113742826	NA	NA	NA	NA	NA	NA	NA	NA	NA	NA	NA	NA	NA	NA	LOC113731901	NA	NA	NA	NA	LOC113709727	NA	NA	NA	NA
LOC113730018	NA	NA	NA	NA	NA	NA	NA	NA	NA	NA	NA	NA	NA	NA	LOC113712823	NA	NA	NA	NA	LOC113696210	NA	NA	NA	NA
LOC113710541	NA	NA	NA	NA	NA	NA	NA	NA	NA	NA	NA	NA	NA	NA	LOC113701598	NA	NA	NA	NA	LOC113731901	NA	NA	NA	NA
LOC113711625	NA	NA	NA	NA	NA	NA	NA	NA	NA	NA	NA	NA	NA	NA	LOC113725944	NA	NA	NA	NA	LOC113707297	NA	NA	NA	NA
LOC113715228	NA	NA	NA	NA	NA	NA	NA	NA	NA	NA	NA	NA	NA	NA	LOC113730183	NA	NA	NA	NA	LOC113701598	NA	NA	NA	NA
LOC113708091	NA	NA	NA	NA	NA	NA	NA	NA	NA	NA	NA	NA	NA	NA	LOC113728088	NA	NA	NA	NA	LOC113722296	NA	NA	NA	NA
LOC113706316	NA	NA	NA	NA	NA	NA	NA	NA	NA	NA	NA	NA	NA	NA	LOC113715791	NA	NA	NA	NA	LOC113728088	NA	NA	NA	NA
LOC113694193	NA	NA	NA	NA	NA	NA	NA	NA	NA	NA	NA	NA	NA	NA	LOC113734371	NA	NA	NA	NA	LOC113712198	NA	NA	NA	NA
LOC113688937	NA	NA	NA	NA	NA	NA	NA	NA	NA	NA	NA	NA	NA	NA	LOC113727901	NA	NA	NA	NA	LOC113725464	NA	NA	NA	NA
LOC113709284	NA	NA	NA	NA	NA	NA	NA	NA	NA	NA	NA	NA	NA	NA	LOC113719217	NA	NA	NA	NA	LOC113719008	NA	NA	NA	NA
LOC113743776	NA	NA	NA	NA	NA	NA	NA	NA	NA	NA	NA	NA	NA	NA	LOC113710909	NA	NA	NA	NA	LOC113711670	NA	NA	NA	NA
LOC113713782	NA	NA	NA	NA	NA	NA	NA	NA	NA	NA	NA	NA	NA	NA	LOC113704180	NA	NA	NA	NA	LOC113735340	NA	NA	NA	NA
LOC113729945	NA	NA	NA	NA	NA	NA	NA	NA	NA	NA	NA	NA	NA	NA	LOC113741516	NA	NA	NA	NA	LOC113715791	NA	NA	NA	NA
LOC113727678	NA	NA	NA	NA	NA	NA	NA	NA	NA	NA	NA	NA	NA	NA	LOC113687263	NA	NA	NA	NA	LOC113719217	NA	NA	NA	NA
LOC113722973	NA	NA	NA	NA	NA	NA	NA	NA	NA	NA	NA	NA	NA	NA	LOC113726950	NA	NA	NA	NA	LOC113726392	NA	NA	NA	NA
LOC113705216	NA	NA	NA	NA	NA	NA	NA	NA	NA	NA	NA	NA	NA	NA	LOC113730022	NA	NA	NA	NA	LOC113735157	NA	NA	NA	NA
LOC113728096	NA	NA	NA	NA	NA	NA	NA	NA	NA	NA	NA	NA	NA	NA	LOC113710523	NA	NA	NA	NA	LOC113716816	NA	NA	NA	NA
LOC113739575	NA	NA	NA	NA	NA	NA	NA	NA	NA	NA	NA	NA	NA	NA	LOC113730777	NA	NA	NA	NA	LOC113708870	NA	NA	NA	NA
LOC113702257	NA	NA	NA	NA	NA	NA	NA	NA	NA	NA	NA	NA	NA	NA	LOC113732061	NA	NA	NA	NA	LOC113710909	NA	NA	NA	NA
LOC113690389	NA	NA	NA	NA	NA	NA	NA	NA	NA	NA	NA	NA	NA	NA	LOC113707473	NA	NA	NA	NA	LOC113690367	NA	NA	NA	NA
LOC113693562	NA	NA	NA	NA	NA	NA	NA	NA	NA	NA	NA	NA	NA	NA	LOC113735236	NA	NA	NA	NA	LOC113704180	NA	NA	NA	NA
LOC113716712	NA	NA	NA	NA	NA	NA	NA	NA	NA	NA	NA	NA	NA	NA	LOC113690460	NA	NA	NA	NA	LOC113726950	NA	NA	NA	NA
LOC113708980	NA	NA	NA	NA	NA	NA	NA	NA	NA	NA	NA	NA	NA	NA	LOC113734800	NA	NA	NA	NA	LOC113730777	NA	NA	NA	NA
LOC113696011	NA	NA	NA	NA	NA	NA	NA	NA	NA	NA	NA	NA	NA	NA	LOC113691446	NA	NA	NA	NA	LOC113743308	NA	NA	NA	NA
LOC113722967	NA	NA	NA	NA	NA	NA	NA	NA	NA	NA	NA	NA	NA	NA	LOC113717034	NA	NA	NA	NA	LOC113701859	NA	NA	NA	NA
LOC113695085	NA	NA	NA	NA	NA	NA	NA	NA	NA	NA	NA	NA	NA	NA	LOC113704179	NA	NA	NA	NA	LOC113707473	NA	NA	NA	NA
LOC113734421	NA	NA	NA	NA	NA	NA	NA	NA	NA	NA	NA	NA	NA	NA	LOC113727409	NA	NA	NA	NA	LOC113714627	NA	NA	NA	NA
LOC113725636	NA	NA	NA	NA	NA	NA	NA	NA	NA	NA	NA	NA	NA	NA	LOC113708510	NA	NA	NA	NA	LOC113699242	NA	NA	NA	NA
LOC113728172	NA	NA	NA	NA	NA	NA	NA	NA	NA	NA	NA	NA	NA	NA	LOC113713585	NA	NA	NA	NA	LOC113694207	NA	NA	NA	NA
LOC113733816	NA	NA	NA	NA	NA	NA	NA	NA	NA	NA	NA	NA	NA	NA	LOC113699303	NA	NA	NA	NA	LOC113726210	NA	NA	NA	NA
LOC113693720	NA	NA	NA	NA	NA	NA	NA	NA	NA	NA	NA	NA	NA	NA	LOC113736228	NA	NA	NA	NA	LOC113714713	NA	NA	NA	NA
LOC113716680	NA	NA	NA	NA	NA	NA	NA	NA	NA	NA	NA	NA	NA	NA	LOC113703658	NA	NA	NA	NA	LOC113698190	NA	NA	NA	NA
LOC113727016	NA	NA	NA	NA	NA	NA	NA	NA	NA	NA	NA	NA	NA	NA	LOC113715153	NA	NA	NA	NA	LOC113702001	NA	NA	NA	NA
LOC113723071	NA	NA	NA	NA	NA	NA	NA	NA	NA	NA	NA	NA	NA	NA	LOC113741762	NA	NA	NA	NA	LOC113717034	NA	NA	NA	NA
LOC113739856	NA	NA	NA	NA	NA	NA	NA	NA	NA	NA	NA	NA	NA	NA	LOC113719235	NA	NA	NA	NA	LOC113707431	NA	NA	NA	NA
LOC113722933	NA	NA	NA	NA	NA	NA	NA	NA	NA	NA	NA	NA	NA	NA	LOC113728057	NA	NA	NA	NA	LOC113736426	NA	NA	NA	NA
LOC113743198	NA	NA	NA	NA	NA	NA	NA	NA	NA	NA	NA	NA	NA	NA	LOC113733112	NA	NA	NA	NA	LOC113716817	NA	NA	NA	NA
LOC113740560	NA	NA	NA	NA	NA	NA	NA	NA	NA	NA	NA	NA	NA	NA	LOC113741533	NA	NA	NA	NA	LOC113727409	NA	NA	NA	NA
LOC113732575	NA	NA	NA	NA	NA	NA	NA	NA	NA	NA	NA	NA	NA	NA	LOC113701277	NA	NA	NA	NA	LOC113734183	NA	NA	NA	NA
LOC113706912	NA	NA	NA	NA	NA	NA	NA	NA	NA	NA	NA	NA	NA	NA	LOC113698663	NA	NA	NA	NA	LOC113706941	NA	NA	NA	NA
LOC113722738	NA	NA	NA	NA	NA	NA	NA	NA	NA	NA	NA	NA	NA	NA	LOC113688296	NA	NA	NA	NA	LOC113687824	NA	NA	NA	NA
LOC113700431	NA	NA	NA	NA	NA	NA	NA	NA	NA	NA	NA	NA	NA	NA	LOC113697120	NA	NA	NA	NA	LOC113699303	NA	NA	NA	NA
LOC113702894	NA	NA	NA	NA	NA	NA	NA	NA	NA	NA	NA	NA	NA	NA	LOC113711036	NA	NA	NA	NA	LOC113703658	NA	NA	NA	NA
LOC113725022	NA	NA	NA	NA	NA	NA	NA	NA	NA	NA	NA	NA	NA	NA	LOC113725669	NA	NA	NA	NA	LOC113715153	NA	NA	NA	NA
LOC113706721	NA	NA	NA	NA	NA	NA	NA	NA	NA	NA	NA	NA	NA	NA	LOC113723060	NA	NA	NA	NA	LOC113736918	NA	NA	NA	NA
LOC113688879	NA	NA	NA	NA	NA	NA	NA	NA	NA	NA	NA	NA	NA	NA	LOC113713683	NA	NA	NA	NA	LOC113742667	NA	NA	NA	NA
LOC113698561	NA	NA	NA	NA	NA	NA	NA	NA	NA	NA	NA	NA	NA	NA	LOC113727632	NA	NA	NA	NA	LOC113731073	NA	NA	NA	NA
LOC113732015	NA	NA	NA	NA	NA	NA	NA	NA	NA	NA	NA	NA	NA	NA	LOC113715196	NA	NA	NA	NA	LOC113722811	NA	NA	NA	NA
LOC113731505	NA	NA	NA	NA	NA	NA	NA	NA	NA	NA	NA	NA	NA	NA	LOC113726702	NA	NA	NA	NA	LOC113735146	NA	NA	NA	NA
LOC113690795	NA	NA	NA	NA	NA	NA	NA	NA	NA	NA	NA	NA	NA	NA	LOC113732207	NA	NA	NA	NA	LOC113695469	NA	NA	NA	NA
LOC113702246	NA	NA	NA	NA	NA	NA	NA	NA	NA	NA	NA	NA	NA	NA	LOC113706339	NA	NA	NA	NA	LOC113722849	NA	NA	NA	NA
LOC113708647	NA	NA	NA	NA	NA	NA	NA	NA	NA	NA	NA	NA	NA	NA	LOC113697365	NA	NA	NA	NA	LOC113711662	NA	NA	NA	NA
LOC113696084	NA	NA	NA	NA	NA	NA	NA	NA	NA	NA	NA	NA	NA	NA	LOC113715151	NA	NA	NA	NA	LOC113738078	NA	NA	NA	NA
LOC113688037	NA	NA	NA	NA	NA	NA	NA	NA	NA	NA	NA	NA	NA	NA	LOC113700346	NA	NA	NA	NA	LOC113692539	NA	NA	NA	NA
LOC113703862	NA	NA	NA	NA	NA	NA	NA	NA	NA	NA	NA	NA	NA	NA	LOC113732573	NA	NA	NA	NA	LOC113729432	NA	NA	NA	NA
LOC113717304	NA	NA	NA	NA	NA	NA	NA	NA	NA	NA	NA	NA	NA	NA	LOC113727825	NA	NA	NA	NA	LOC113697307	NA	NA	NA	NA
LOC113715057	NA	NA	NA	NA	NA	NA	NA	NA	NA	NA	NA	NA	NA	NA	LOC113712767	NA	NA	NA	NA	LOC113733960	NA	NA	NA	NA
LOC113725350	NA	NA	NA	NA	NA	NA	NA	NA	NA	NA	NA	NA	NA	NA	LOC113739861	NA	NA	NA	NA	LOC113699054	NA	NA	NA	NA
LOC113687935	NA	NA	NA	NA	NA	NA	NA	NA	NA	NA	NA	NA	NA	NA	LOC113734298	NA	NA	NA	NA	LOC113711036	NA	NA	NA	NA
LOC113714625	NA	NA	NA	NA	NA	NA	NA	NA	NA	NA	NA	NA	NA	NA	LOC113715222	NA	NA	NA	NA	LOC113725669	NA	NA	NA	NA
LOC113696096	NA	NA	NA	NA	NA	NA	NA	NA	NA	NA	NA	NA	NA	NA	LOC113708569	NA	NA	NA	NA	LOC113723060	NA	NA	NA	NA
LOC113732585	NA	NA	NA	NA	NA	NA	NA	NA	NA	NA	NA	NA	NA	NA	LOC113699412	NA	NA	NA	NA	LOC113712271	NA	NA	NA	NA
LOC113705530	NA	NA	NA	NA	NA	NA	NA	NA	NA	NA	NA	NA	NA	NA	LOC113708568	NA	NA	NA	NA	LOC113710497	NA	NA	NA	NA
LOC113690449	NA	NA	NA	NA	NA	NA	NA	NA	NA	NA	NA	NA	NA	NA	LOC113731413	NA	NA	NA	NA	LOC113735139	NA	NA	NA	NA
LOC113713898	NA	NA	NA	NA	NA	NA	NA	NA	NA	NA	NA	NA	NA	NA	LOC113707879	NA	NA	NA	NA	LOC113715196	NA	NA	NA	NA
LOC113701461	NA	NA	NA	NA	NA	NA	NA	NA	NA	NA	NA	NA	NA	NA	LOC113719708	NA	NA	NA	NA	LOC113726702	NA	NA	NA	NA
LOC113716447	NA	NA	NA	NA	NA	NA	NA	NA	NA	NA	NA	NA	NA	NA	LOC113700141	NA	NA	NA	NA	LOC113697347	NA	NA	NA	NA
LOC113694769	NA	NA	NA	NA	NA	NA	NA	NA	NA	NA	NA	NA	NA	NA	LOC113728049	NA	NA	NA	NA	LOC113726749	NA	NA	NA	NA
LOC113690577	NA	NA	NA	NA	NA	NA	NA	NA	NA	NA	NA	NA	NA	NA	LOC113715424	NA	NA	NA	NA	LOC113713334	NA	NA	NA	NA
LOC113733166	NA	NA	NA	NA	NA	NA	NA	NA	NA	NA	NA	NA	NA	NA	LOC113724625	NA	NA	NA	NA	LOC113725391	NA	NA	NA	NA
LOC113688809	NA	NA	NA	NA	NA	NA	NA	NA	NA	NA	NA	NA	NA	NA	LOC113712921	NA	NA	NA	NA	LOC113741579	NA	NA	NA	NA
LOC113725055	NA	NA	NA	NA	NA	NA	NA	NA	NA	NA	NA	NA	NA	NA	LOC113733255	NA	NA	NA	NA	LOC113709215	NA	NA	NA	NA
LOC113718721	NA	NA	NA	NA	NA	NA	NA	NA	NA	NA	NA	NA	NA	NA	LOC113713129	NA	NA	NA	NA	LOC113713987	NA	NA	NA	NA
LOC113692882	NA	NA	NA	NA	NA	NA	NA	NA	NA	NA	NA	NA	NA	NA	LOC113725615	NA	NA	NA	NA	LOC113727825	NA	NA	NA	NA
LOC113708919	NA	NA	NA	NA	NA	NA	NA	NA	NA	NA	NA	NA	NA	NA	LOC113710427	NA	NA	NA	NA	LOC113712767	NA	NA	NA	NA
LOC113694640	NA	NA	NA	NA	NA	NA	NA	NA	NA	NA	NA	NA	NA	NA	LOC113713197	NA	NA	NA	NA	LOC113739861	NA	NA	NA	NA
LOC113725071	NA	NA	NA	NA	NA	NA	NA	NA	NA	NA	NA	NA	NA	NA	LOC113738541	NA	NA	NA	NA	LOC113727880	NA	NA	NA	NA
LOC113712265	NA	NA	NA	NA	NA	NA	NA	NA	NA	NA	NA	NA	NA	NA	LOC113704134	NA	NA	NA	NA	LOC113734298	NA	NA	NA	NA
LOC113687924	NA	NA	NA	NA	NA	NA	NA	NA	NA	NA	NA	NA	NA	NA	LOC113698470	NA	NA	NA	NA	LOC113731836	NA	NA	NA	NA
LOC113703946	NA	NA	NA	NA	NA	NA	NA	NA	NA	NA	NA	NA	NA	NA	LOC113711771	NA	NA	NA	NA	LOC113699412	NA	NA	NA	NA
LOC113716493	NA	NA	NA	NA	NA	NA	NA	NA	NA	NA	NA	NA	NA	NA	LOC113734545	NA	NA	NA	NA	LOC113708568	NA	NA	NA	NA
LOC113743378	NA	NA	NA	NA	NA	NA	NA	NA	NA	NA	NA	NA	NA	NA	LOC113743226	NA	NA	NA	NA	LOC113719708	NA	NA	NA	NA
LOC113714494	NA	NA	NA	NA	NA	NA	NA	NA	NA	NA	NA	NA	NA	NA	LOC113690567	NA	NA	NA	NA	LOC113712891	NA	NA	NA	NA
LOC113701645	NA	NA	NA	NA	NA	NA	NA	NA	NA	NA	NA	NA	NA	NA	LOC113706905	NA	NA	NA	NA	LOC113697260	NA	NA	NA	NA
LOC113719053	NA	NA	NA	NA	NA	NA	NA	NA	NA	NA	NA	NA	NA	NA	LOC113742696	NA	NA	NA	NA	LOC113693106	NA	NA	NA	NA
LOC113739899	NA	NA	NA	NA	NA	NA	NA	NA	NA	NA	NA	NA	NA	NA	LOC113696184	NA	NA	NA	NA	LOC113715424	NA	NA	NA	NA
LOC113733044	NA	NA	NA	NA	NA	NA	NA	NA	NA	NA	NA	NA	NA	NA	LOC113733966	NA	NA	NA	NA	LOC113710577	NA	NA	NA	NA
LOC113707796	NA	NA	NA	NA	NA	NA	NA	NA	NA	NA	NA	NA	NA	NA	LOC113697991	NA	NA	NA	NA	LOC113712921	NA	NA	NA	NA
LOC113713487	NA	NA	NA	NA	NA	NA	NA	NA	NA	NA	NA	NA	NA	NA	LOC113697369	NA	NA	NA	NA	LOC113693643	NA	NA	NA	NA
LOC113724744	NA	NA	NA	NA	NA	NA	NA	NA	NA	NA	NA	NA	NA	NA	LOC113743060	NA	NA	NA	NA	LOC113713197	NA	NA	NA	NA
LOC113735814	NA	NA	NA	NA	NA	NA	NA	NA	NA	NA	NA	NA	NA	NA	LOC113734944	NA	NA	NA	NA	LOC113688155	NA	NA	NA	NA
LOC113717183	NA	NA	NA	NA	NA	NA	NA	NA	NA	NA	NA	NA	NA	NA	LOC113732879	NA	NA	NA	NA	LOC113711771	NA	NA	NA	NA
LOC113694904	NA	NA	NA	NA	NA	NA	NA	NA	NA	NA	NA	NA	NA	NA	LOC113704043	NA	NA	NA	NA	LOC113735226	NA	NA	NA	NA
LOC113703678	NA	NA	NA	NA	NA	NA	NA	NA	NA	NA	NA	NA	NA	NA	LOC113715633	NA	NA	NA	NA	LOC113730166	NA	NA	NA	NA
LOC113727088	NA	NA	NA	NA	NA	NA	NA	NA	NA	NA	NA	NA	NA	NA	LOC113694968	NA	NA	NA	NA	LOC113697991	NA	NA	NA	NA
LOC113698064	NA	NA	NA	NA	NA	NA	NA	NA	NA	NA	NA	NA	NA	NA	LOC113696996	NA	NA	NA	NA	LOC113697369	NA	NA	NA	NA
LOC113724761	NA	NA	NA	NA	NA	NA	NA	NA	NA	NA	NA	NA	NA	NA	LOC113736526	NA	NA	NA	NA	LOC113710385	NA	NA	NA	NA
LOC113688201	NA	NA	NA	NA	NA	NA	NA	NA	NA	NA	NA	NA	NA	NA	LOC113730855	NA	NA	NA	NA	LOC113725573	NA	NA	NA	NA
LOC113719450	NA	NA	NA	NA	NA	NA	NA	NA	NA	NA	NA	NA	NA	NA	LOC113697289	NA	NA	NA	NA	LOC113727251	NA	NA	NA	NA
LOC113727767	NA	NA	NA	NA	NA	NA	NA	NA	NA	NA	NA	NA	NA	NA	LOC113734637	NA	NA	NA	NA	LOC113742269	NA	NA	NA	NA
LOC113711639	NA	NA	NA	NA	NA	NA	NA	NA	NA	NA	NA	NA	NA	NA	LOC113699972	NA	NA	NA	NA	LOC113705397	NA	NA	NA	NA
LOC113732518	NA	NA	NA	NA	NA	NA	NA	NA	NA	NA	NA	NA	NA	NA	LOC113710440	NA	NA	NA	NA	LOC113688525	NA	NA	NA	NA
LOC113692704	NA	NA	NA	NA	NA	NA	NA	NA	NA	NA	NA	NA	NA	NA	LOC113694238	NA	NA	NA	NA	LOC113709354	NA	NA	NA	NA
LOC113714797	NA	NA	NA	NA	NA	NA	NA	NA	NA	NA	NA	NA	NA	NA	LOC113701914	NA	NA	NA	NA	LOC113727994	NA	NA	NA	NA
LOC113690596	NA	NA	NA	NA	NA	NA	NA	NA	NA	NA	NA	NA	NA	NA	LOC113690875	NA	NA	NA	NA	LOC113697289	NA	NA	NA	NA
LOC113714767	NA	NA	NA	NA	NA	NA	NA	NA	NA	NA	NA	NA	NA	NA	LOC113699939	NA	NA	NA	NA	LOC113704298	NA	NA	NA	NA
LOC113694077	NA	NA	NA	NA	NA	NA	NA	NA	NA	NA	NA	NA	NA	NA	LOC113739964	NA	NA	NA	NA	LOC113701914	NA	NA	NA	NA
LOC113725505	NA	NA	NA	NA	NA	NA	NA	NA	NA	NA	NA	NA	NA	NA	LOC113725340	NA	NA	NA	NA	LOC113688284	NA	NA	NA	NA
LOC113709426	NA	NA	NA	NA	NA	NA	NA	NA	NA	NA	NA	NA	NA	NA	LOC113730809	NA	NA	NA	NA	LOC113742800	NA	NA	NA	NA
LOC113740353	NA	NA	NA	NA	NA	NA	NA	NA	NA	NA	NA	NA	NA	NA	LOC113711651	NA	NA	NA	NA	LOC113702819	NA	NA	NA	NA
LOC113719357	NA	NA	NA	NA	NA	NA	NA	NA	NA	NA	NA	NA	NA	NA	LOC113731409	NA	NA	NA	NA	LOC113695145	NA	NA	NA	NA
LOC113709630	NA	NA	NA	NA	NA	NA	NA	NA	NA	NA	NA	NA	NA	NA	LOC113702819	NA	NA	NA	NA	LOC113719132	NA	NA	NA	NA
LOC113690448	NA	NA	NA	NA	NA	NA	NA	NA	NA	NA	NA	NA	NA	NA	LOC113694784	NA	NA	NA	NA	LOC113717187	NA	NA	NA	NA
LOC113731383	NA	NA	NA	NA	NA	NA	NA	NA	NA	NA	NA	NA	NA	NA	LOC113727655	NA	NA	NA	NA	LOC113707764	NA	NA	NA	NA
LOC113695945	NA	NA	NA	NA	NA	NA	NA	NA	NA	NA	NA	NA	NA	NA	LOC113695035	NA	NA	NA	NA	LOC113719637	NA	NA	NA	NA
LOC113738163	NA	NA	NA	NA	NA	NA	NA	NA	NA	NA	NA	NA	NA	NA	LOC113738154	NA	NA	NA	NA	LOC113716958	NA	NA	NA	NA
LOC113734225	NA	NA	NA	NA	NA	NA	NA	NA	NA	NA	NA	NA	NA	NA	LOC113695145	NA	NA	NA	NA	LOC113740070	NA	NA	NA	NA
LOC113731853	NA	NA	NA	NA	NA	NA	NA	NA	NA	NA	NA	NA	NA	NA	LOC113731545	NA	NA	NA	NA	LOC113724962	NA	NA	NA	NA
LOC113688165	NA	NA	NA	NA	NA	NA	NA	NA	NA	NA	NA	NA	NA	NA	LOC113730591	NA	NA	NA	NA	LOC113742145	NA	NA	NA	NA
LOC113742431	NA	NA	NA	NA	NA	NA	NA	NA	NA	NA	NA	NA	NA	NA	LOC113719637	NA	NA	NA	NA	LOC113701006	NA	NA	NA	NA
LOC113727315	NA	NA	NA	NA	NA	NA	NA	NA	NA	NA	NA	NA	NA	NA	LOC113716958	NA	NA	NA	NA	LOC113733337	NA	NA	NA	NA
LOC113732057	NA	NA	NA	NA	NA	NA	NA	NA	NA	NA	NA	NA	NA	NA	LOC113740070	NA	NA	NA	NA	LOC113734080	NA	NA	NA	NA
LOC113725808	NA	NA	NA	NA	NA	NA	NA	NA	NA	NA	NA	NA	NA	NA	LOC113724962	NA	NA	NA	NA	LOC113703626	NA	NA	NA	NA
LOC113731140	NA	NA	NA	NA	NA	NA	NA	NA	NA	NA	NA	NA	NA	NA	LOC113713513	NA	NA	NA	NA	LOC113742181	NA	NA	NA	NA
LOC113742349	NA	NA	NA	NA	NA	NA	NA	NA	NA	NA	NA	NA	NA	NA	LOC113733163	NA	NA	NA	NA	LOC113697259	NA	NA	NA	NA
LOC113730103	NA	NA	NA	NA	NA	NA	NA	NA	NA	NA	NA	NA	NA	NA	LOC113701006	NA	NA	NA	NA	LOC113719186	NA	NA	NA	NA
LOC113712388	NA	NA	NA	NA	NA	NA	NA	NA	NA	NA	NA	NA	NA	NA	LOC113715114	NA	NA	NA	NA	LOC113728213	NA	NA	NA	NA
LOC113693969	NA	NA	NA	NA	NA	NA	NA	NA	NA	NA	NA	NA	NA	NA	LOC113733878	NA	NA	NA	NA	LOC113734773	NA	NA	NA	NA
LOC113728092	NA	NA	NA	NA	NA	NA	NA	NA	NA	NA	NA	NA	NA	NA	LOC113696695	NA	NA	NA	NA	LOC113743694	NA	NA	NA	NA
LOC113715318	NA	NA	NA	NA	NA	NA	NA	NA	NA	NA	NA	NA	NA	NA	LOC113728213	NA	NA	NA	NA	LOC113695203	NA	NA	NA	NA
LOC113690461	NA	NA	NA	NA	NA	NA	NA	NA	NA	NA	NA	NA	NA	NA	LOC113726694	NA	NA	NA	NA	LOC113702767	NA	NA	NA	NA
LOC113712141	NA	NA	NA	NA	NA	NA	NA	NA	NA	NA	NA	NA	NA	NA	LOC113716848	NA	NA	NA	NA	LOC113732880	NA	NA	NA	NA
LOC113688029	NA	NA	NA	NA	NA	NA	NA	NA	NA	NA	NA	NA	NA	NA	LOC113743694	NA	NA	NA	NA	LOC113714461	NA	NA	NA	NA
LOC113739764	NA	NA	NA	NA	NA	NA	NA	NA	NA	NA	NA	NA	NA	NA	LOC113714824	NA	NA	NA	NA	LOC113725116	NA	NA	NA	NA
LOC113726168	NA	NA	NA	NA	NA	NA	NA	NA	NA	NA	NA	NA	NA	NA	LOC113700115	NA	NA	NA	NA	LOC113699954	NA	NA	NA	NA
LOC113707106	NA	NA	NA	NA	NA	NA	NA	NA	NA	NA	NA	NA	NA	NA	LOC113692398	NA	NA	NA	NA	LOC113688324	NA	NA	NA	NA
LOC113709122	NA	NA	NA	NA	NA	NA	NA	NA	NA	NA	NA	NA	NA	NA	LOC113706953	NA	NA	NA	NA	LOC113693796	NA	NA	NA	NA
LOC113735324	NA	NA	NA	NA	NA	NA	NA	NA	NA	NA	NA	NA	NA	NA	LOC113741513	NA	NA	NA	NA	LOC113729927	NA	NA	NA	NA
LOC113730554	NA	NA	NA	NA	NA	NA	NA	NA	NA	NA	NA	NA	NA	NA	LOC113732534	NA	NA	NA	NA	LOC113709497	NA	NA	NA	NA
LOC113690575	NA	NA	NA	NA	NA	NA	NA	NA	NA	NA	NA	NA	NA	NA	LOC113699954	NA	NA	NA	NA	LOC113741607	NA	NA	NA	NA
LOC113701314	NA	NA	NA	NA	NA	NA	NA	NA	NA	NA	NA	NA	NA	NA	LOC113693796	NA	NA	NA	NA	LOC113692275	NA	NA	NA	NA
LOC113726924	NA	NA	NA	NA	NA	NA	NA	NA	NA	NA	NA	NA	NA	NA	LOC113713315	NA	NA	NA	NA	LOC113695652	NA	NA	NA	NA
LOC113715356	NA	NA	NA	NA	NA	NA	NA	NA	NA	NA	NA	NA	NA	NA	LOC113709400	NA	NA	NA	NA	LOC113688021	NA	NA	NA	NA
LOC113706747	NA	NA	NA	NA	NA	NA	NA	NA	NA	NA	NA	NA	NA	NA	LOC113729927	NA	NA	NA	NA	LOC113690506	NA	NA	NA	NA
LOC113725567	NA	NA	NA	NA	NA	NA	NA	NA	NA	NA	NA	NA	NA	NA	LOC113709497	NA	NA	NA	NA	LOC113698522	NA	NA	NA	NA
LOC113707488	NA	NA	NA	NA	NA	NA	NA	NA	NA	NA	NA	NA	NA	NA	LOC113718015	NA	NA	NA	NA	LOC113722789	NA	NA	NA	NA
LOC113734942	NA	NA	NA	NA	NA	NA	NA	NA	NA	NA	NA	NA	NA	NA	LOC113717170	NA	NA	NA	NA	LOC113696027	NA	NA	NA	NA
LOC113732777	NA	NA	NA	NA	NA	NA	NA	NA	NA	NA	NA	NA	NA	NA	LOC113692275	NA	NA	NA	NA	LOC113716965	NA	NA	NA	NA
LOC113738121	NA	NA	NA	NA	NA	NA	NA	NA	NA	NA	NA	NA	NA	NA	LOC113688021	NA	NA	NA	NA	LOC113730862	NA	NA	NA	NA
LOC113719543	NA	NA	NA	NA	NA	NA	NA	NA	NA	NA	NA	NA	NA	NA	LOC113691130	NA	NA	NA	NA	LOC113723473	NA	NA	NA	NA
LOC113741749	NA	NA	NA	NA	NA	NA	NA	NA	NA	NA	NA	NA	NA	NA	LOC113722789	NA	NA	NA	NA	LOC113718952	NA	NA	NA	NA
LOC113701960	NA	NA	NA	NA	NA	NA	NA	NA	NA	NA	NA	NA	NA	NA	LOC113696027	NA	NA	NA	NA	LOC113726280	NA	NA	NA	NA
LOC113695342	NA	NA	NA	NA	NA	NA	NA	NA	NA	NA	NA	NA	NA	NA	LOC113716965	NA	NA	NA	NA	LOC113690858	NA	NA	NA	NA
LOC113693946	NA	NA	NA	NA	NA	NA	NA	NA	NA	NA	NA	NA	NA	NA	LOC113699686	NA	NA	NA	NA	LOC113734804	NA	NA	NA	NA
LOC113726062	NA	NA	NA	NA	NA	NA	NA	NA	NA	NA	NA	NA	NA	NA	LOC113730862	NA	NA	NA	NA	LOC113715130	NA	NA	NA	NA
LOC113734398	NA	NA	NA	NA	NA	NA	NA	NA	NA	NA	NA	NA	NA	NA	LOC113688438	NA	NA	NA	NA	LOC113729994	NA	NA	NA	NA
LOC113688264	NA	NA	NA	NA	NA	NA	NA	NA	NA	NA	NA	NA	NA	NA	LOC113731969	NA	NA	NA	NA	LOC113694723	NA	NA	NA	NA
LOC113732033	NA	NA	NA	NA	NA	NA	NA	NA	NA	NA	NA	NA	NA	NA	LOC113727970	NA	NA	NA	NA	LOC113717686	NA	NA	NA	NA
LOC113696132	NA	NA	NA	NA	NA	NA	NA	NA	NA	NA	NA	NA	NA	NA	LOC113741757	NA	NA	NA	NA	LOC113714463	NA	NA	NA	NA
LOC113699298	NA	NA	NA	NA	NA	NA	NA	NA	NA	NA	NA	NA	NA	NA	LOC113734804	NA	NA	NA	NA	LOC113700511	NA	NA	NA	NA
LOC113712304	NA	NA	NA	NA	NA	NA	NA	NA	NA	NA	NA	NA	NA	NA	LOC113729951	NA	NA	NA	NA	LOC113699116	NA	NA	NA	NA
LOC113692548	NA	NA	NA	NA	NA	NA	NA	NA	NA	NA	NA	NA	NA	NA	LOC113731445	NA	NA	NA	NA	LOC113708912	NA	NA	NA	NA
LOC113707172	NA	NA	NA	NA	NA	NA	NA	NA	NA	NA	NA	NA	NA	NA	LOC113738118	NA	NA	NA	NA	LOC113697552	NA	NA	NA	NA
LOC113701723	NA	NA	NA	NA	NA	NA	NA	NA	NA	NA	NA	NA	NA	NA	LOC113712771	NA	NA	NA	NA	LOC113704195	NA	NA	NA	NA
LOC113723674	NA	NA	NA	NA	NA	NA	NA	NA	NA	NA	NA	NA	NA	NA	LOC113698740	NA	NA	NA	NA	LOC113700009	NA	NA	NA	NA
LOC113740225	NA	NA	NA	NA	NA	NA	NA	NA	NA	NA	NA	NA	NA	NA	LOC113696193	NA	NA	NA	NA	LOC113735349	NA	NA	NA	NA
LOC113725429	NA	NA	NA	NA	NA	NA	NA	NA	NA	NA	NA	NA	NA	NA	LOC113728047	NA	NA	NA	NA	LOC113741425	NA	NA	NA	NA
LOC113697261	NA	NA	NA	NA	NA	NA	NA	NA	NA	NA	NA	NA	NA	NA	LOC113741523	NA	NA	NA	NA	LOC113719502	NA	NA	NA	NA
LOC113701740	NA	NA	NA	NA	NA	NA	NA	NA	NA	NA	NA	NA	NA	NA	LOC113700009	NA	NA	NA	NA	LOC113691392	NA	NA	NA	NA
LOC113728163	NA	NA	NA	NA	NA	NA	NA	NA	NA	NA	NA	NA	NA	NA	LOC113712682	NA	NA	NA	NA	LOC113692051	NA	NA	NA	NA
LOC113712358	NA	NA	NA	NA	NA	NA	NA	NA	NA	NA	NA	NA	NA	NA	LOC113690872	NA	NA	NA	NA	LOC113725362	NA	NA	NA	NA
LOC113725175	NA	NA	NA	NA	NA	NA	NA	NA	NA	NA	NA	NA	NA	NA	LOC113732285	NA	NA	NA	NA	LOC113700102	NA	NA	NA	NA
LOC113722930	NA	NA	NA	NA	NA	NA	NA	NA	NA	NA	NA	NA	NA	NA	LOC113719502	NA	NA	NA	NA	LOC113702088	NA	NA	NA	NA
LOC113697793	NA	NA	NA	NA	NA	NA	NA	NA	NA	NA	NA	NA	NA	NA	LOC113717143	NA	NA	NA	NA	LOC113719571	NA	NA	NA	NA
LOC113729865	NA	NA	NA	NA	NA	NA	NA	NA	NA	NA	NA	NA	NA	NA	LOC113689793	NA	NA	NA	NA	LOC113701399	NA	NA	NA	NA
LOC113727884	NA	NA	NA	NA	NA	NA	NA	NA	NA	NA	NA	NA	NA	NA	LOC113702691	NA	NA	NA	NA	LOC113690930	NA	NA	NA	NA
LOC113722894	NA	NA	NA	NA	NA	NA	NA	NA	NA	NA	NA	NA	NA	NA	LOC113706920	NA	NA	NA	NA	LOC113694700	NA	NA	NA	NA
LOC113733962	NA	NA	NA	NA	NA	NA	NA	NA	NA	NA	NA	NA	NA	NA	LOC113712433	NA	NA	NA	NA	LOC113705635	NA	NA	NA	NA
LOC113742296	NA	NA	NA	NA	NA	NA	NA	NA	NA	NA	NA	NA	NA	NA	LOC113736806	NA	NA	NA	NA	LOC113719082	NA	NA	NA	NA
LOC113742970	NA	NA	NA	NA	NA	NA	NA	NA	NA	NA	NA	NA	NA	NA	LOC113688043	NA	NA	NA	NA	LOC113736661	NA	NA	NA	NA
LOC113731177	NA	NA	NA	NA	NA	NA	NA	NA	NA	NA	NA	NA	NA	NA	LOC113697085	NA	NA	NA	NA	LOC113730779	NA	NA	NA	NA
LOC113739849	NA	NA	NA	NA	NA	NA	NA	NA	NA	NA	NA	NA	NA	NA	LOC113704262	NA	NA	NA	NA	LOC113702668	NA	NA	NA	NA
LOC113696047	NA	NA	NA	NA	NA	NA	NA	NA	NA	NA	NA	NA	NA	NA	LOC113726410	NA	NA	NA	NA	LOC113711911	NA	NA	NA	NA
LOC113742958	NA	NA	NA	NA	NA	NA	NA	NA	NA	NA	NA	NA	NA	NA	LOC113719082	NA	NA	NA	NA	LOC113714623	NA	NA	NA	NA
LOC113688520	NA	NA	NA	NA	NA	NA	NA	NA	NA	NA	NA	NA	NA	NA	LOC113738457	NA	NA	NA	NA	LOC113690334	NA	NA	NA	NA
LOC113730446	NA	NA	NA	NA	NA	NA	NA	NA	NA	NA	NA	NA	NA	NA	LOC113708977	NA	NA	NA	NA	LOC113717424	NA	NA	NA	NA
LOC113737074	NA	NA	NA	NA	NA	NA	NA	NA	NA	NA	NA	NA	NA	NA	LOC113734297	NA	NA	NA	NA	LOC113695673	NA	NA	NA	NA
LOC113702228	NA	NA	NA	NA	NA	NA	NA	NA	NA	NA	NA	NA	NA	NA	LOC113726019	NA	NA	NA	NA	LOC113729777	NA	NA	NA	NA
LOC113711755	NA	NA	NA	NA	NA	NA	NA	NA	NA	NA	NA	NA	NA	NA	LOC113733021	NA	NA	NA	NA	LOC113742329	NA	NA	NA	NA
LOC113736267	NA	NA	NA	NA	NA	NA	NA	NA	NA	NA	NA	NA	NA	NA	LOC113702181	NA	NA	NA	NA	LOC113707651	NA	NA	NA	NA
LOC113695988	NA	NA	NA	NA	NA	NA	NA	NA	NA	NA	NA	NA	NA	NA	LOC113707875	NA	NA	NA	NA	LOC113729895	NA	NA	NA	NA
LOC113700356	NA	NA	NA	NA	NA	NA	NA	NA	NA	NA	NA	NA	NA	NA	LOC113732161	NA	NA	NA	NA	LOC113695170	NA	NA	NA	NA
LOC113694229	NA	NA	NA	NA	NA	NA	NA	NA	NA	NA	NA	NA	NA	NA	LOC113717424	NA	NA	NA	NA	LOC113711918	NA	NA	NA	NA
LOC113708758	NA	NA	NA	NA	NA	NA	NA	NA	NA	NA	NA	NA	NA	NA	LOC113695673	NA	NA	NA	NA	LOC113734868	NA	NA	NA	NA
LOC113718685	NA	NA	NA	NA	NA	NA	NA	NA	NA	NA	NA	NA	NA	NA	LOC113701361	NA	NA	NA	NA	LOC113739557	NA	NA	NA	NA
LOC113732752	NA	NA	NA	NA	NA	NA	NA	NA	NA	NA	NA	NA	NA	NA	LOC113742329	NA	NA	NA	NA	LOC113736332	NA	NA	NA	NA
LOC113697193	NA	NA	NA	NA	NA	NA	NA	NA	NA	NA	NA	NA	NA	NA	LOC113737015	NA	NA	NA	NA	LOC113697678	NA	NA	NA	NA
LOC113707440	NA	NA	NA	NA	NA	NA	NA	NA	NA	NA	NA	NA	NA	NA	LOC113727397	NA	NA	NA	NA	LOC113730524	NA	NA	NA	NA
LOC113708592	NA	NA	NA	NA	NA	NA	NA	NA	NA	NA	NA	NA	NA	NA	LOC113727640	NA	NA	NA	NA	LOC113730974	NA	NA	NA	NA
LOC113723798	NA	NA	NA	NA	NA	NA	NA	NA	NA	NA	NA	NA	NA	NA	LOC113729895	NA	NA	NA	NA	LOC113742894	NA	NA	NA	NA
LOC113703842	NA	NA	NA	NA	NA	NA	NA	NA	NA	NA	NA	NA	NA	NA	LOC113697118	NA	NA	NA	NA	LOC113704829	NA	NA	NA	NA
LOC113708852	NA	NA	NA	NA	NA	NA	NA	NA	NA	NA	NA	NA	NA	NA	LOC113729700	NA	NA	NA	NA	LOC113701734	NA	NA	NA	NA
LOC113714448	NA	NA	NA	NA	NA	NA	NA	NA	NA	NA	NA	NA	NA	NA	LOC113734868	NA	NA	NA	NA	LOC113717254	NA	NA	NA	NA
LOC113730265	NA	NA	NA	NA	NA	NA	NA	NA	NA	NA	NA	NA	NA	NA	LOC113730437	NA	NA	NA	NA	LOC113730806	NA	NA	NA	NA
LOC113718757	NA	NA	NA	NA	NA	NA	NA	NA	NA	NA	NA	NA	NA	NA	LOC113730524	NA	NA	NA	NA	LOC113727348	NA	NA	NA	NA
LOC113732489	NA	NA	NA	NA	NA	NA	NA	NA	NA	NA	NA	NA	NA	NA	LOC113692685	NA	NA	NA	NA	LOC113697476	NA	NA	NA	NA
LOC113698722	NA	NA	NA	NA	NA	NA	NA	NA	NA	NA	NA	NA	NA	NA	LOC113706266	NA	NA	NA	NA	LOC113735215	NA	NA	NA	NA
LOC113706691	NA	NA	NA	NA	NA	NA	NA	NA	NA	NA	NA	NA	NA	NA	LOC113695282	NA	NA	NA	NA	LOC113736729	NA	NA	NA	NA
LOC113698001	NA	NA	NA	NA	NA	NA	NA	NA	NA	NA	NA	NA	NA	NA	LOC113727685	NA	NA	NA	NA	LOC113732379	NA	NA	NA	NA
LOC113727722	NA	NA	NA	NA	NA	NA	NA	NA	NA	NA	NA	NA	NA	NA	LOC113717254	NA	NA	NA	NA	LOC113738579	NA	NA	NA	NA
LOC113712405	NA	NA	NA	NA	NA	NA	NA	NA	NA	NA	NA	NA	NA	NA	LOC113707414	NA	NA	NA	NA	LOC113725501	NA	NA	NA	NA
LOC113727305	NA	NA	NA	NA	NA	NA	NA	NA	NA	NA	NA	NA	NA	NA	LOC113727619	NA	NA	NA	NA	LOC113698986	NA	NA	NA	NA
LOC113734774	NA	NA	NA	NA	NA	NA	NA	NA	NA	NA	NA	NA	NA	NA	LOC113730806	NA	NA	NA	NA	LOC113702720	NA	NA	NA	NA
LOC113710924	NA	NA	NA	NA	NA	NA	NA	NA	NA	NA	NA	NA	NA	NA	LOC113730227	NA	NA	NA	NA	LOC113698890	NA	NA	NA	NA
LOC113695134	NA	NA	NA	NA	NA	NA	NA	NA	NA	NA	NA	NA	NA	NA	LOC113718780	NA	NA	NA	NA	LOC113740251	NA	NA	NA	NA
LOC113695453	NA	NA	NA	NA	NA	NA	NA	NA	NA	NA	NA	NA	NA	NA	LOC113732379	NA	NA	NA	NA	LOC113711684	NA	NA	NA	NA
LOC113694182	NA	NA	NA	NA	NA	NA	NA	NA	NA	NA	NA	NA	NA	NA	LOC113700017	NA	NA	NA	NA	LOC113698900	NA	NA	NA	NA
LOC113698210	NA	NA	NA	NA	NA	NA	NA	NA	NA	NA	NA	NA	NA	NA	LOC113725501	NA	NA	NA	NA	LOC113730785	NA	NA	NA	NA
LOC113739666	NA	NA	NA	NA	NA	NA	NA	NA	NA	NA	NA	NA	NA	NA	LOC113730510	NA	NA	NA	NA	LOC113708600	NA	NA	NA	NA
LOC113693952	NA	NA	NA	NA	NA	NA	NA	NA	NA	NA	NA	NA	NA	NA	LOC113724961	NA	NA	NA	NA	LOC113742597	NA	NA	NA	NA
LOC113701285	NA	NA	NA	NA	NA	NA	NA	NA	NA	NA	NA	NA	NA	NA	LOC113725580	NA	NA	NA	NA	LOC113734912	NA	NA	NA	NA
LOC113730021	NA	NA	NA	NA	NA	NA	NA	NA	NA	NA	NA	NA	NA	NA	LOC113715506	NA	NA	NA	NA	LOC113708793	NA	NA	NA	NA
LOC113688044	NA	NA	NA	NA	NA	NA	NA	NA	NA	NA	NA	NA	NA	NA	LOC113690314	NA	NA	NA	NA	LOC113692349	NA	NA	NA	NA
LOC113702090	NA	NA	NA	NA	NA	NA	NA	NA	NA	NA	NA	NA	NA	NA	LOC113730785	NA	NA	NA	NA	LOC113734184	NA	NA	NA	NA
LOC113693640	NA	NA	NA	NA	NA	NA	NA	NA	NA	NA	NA	NA	NA	NA	LOC113731259	NA	NA	NA	NA	LOC113708053	NA	NA	NA	NA
LOC113742370	NA	NA	NA	NA	NA	NA	NA	NA	NA	NA	NA	NA	NA	NA	LOC113712926	NA	NA	NA	NA	LOC113701099	NA	NA	NA	NA
LOC113739960	NA	NA	NA	NA	NA	NA	NA	NA	NA	NA	NA	NA	NA	NA	LOC113742597	NA	NA	NA	NA	LOC113733711	NA	NA	NA	NA
LOC113740220	NA	NA	NA	NA	NA	NA	NA	NA	NA	NA	NA	NA	NA	NA	LOC113734912	NA	NA	NA	NA	LOC113702131	NA	NA	NA	NA
LOC113725943	NA	NA	NA	NA	NA	NA	NA	NA	NA	NA	NA	NA	NA	NA	LOC113736548	NA	NA	NA	NA	LOC113691753	NA	NA	NA	NA
LOC113690781	NA	NA	NA	NA	NA	NA	NA	NA	NA	NA	NA	NA	NA	NA	LOC113708053	NA	NA	NA	NA	LOC113692678	NA	NA	NA	NA
LOC113703218	NA	NA	NA	NA	NA	NA	NA	NA	NA	NA	NA	NA	NA	NA	LOC113690397	NA	NA	NA	NA	LOC113709797	NA	NA	NA	NA
LOC113724981	NA	NA	NA	NA	NA	NA	NA	NA	NA	NA	NA	NA	NA	NA	LOC113707356	NA	NA	NA	NA	LOC113698803	NA	NA	NA	NA
LOC113694938	NA	NA	NA	NA	NA	NA	NA	NA	NA	NA	NA	NA	NA	NA	LOC113733711	NA	NA	NA	NA	LOC113691769	NA	NA	NA	NA
LOC113709414	NA	NA	NA	NA	NA	NA	NA	NA	NA	NA	NA	NA	NA	NA	LOC113710482	NA	NA	NA	NA	LOC113723085	NA	NA	NA	NA
LOC113741888	NA	NA	NA	NA	NA	NA	NA	NA	NA	NA	NA	NA	NA	NA	LOC113691769	NA	NA	NA	NA	LOC113702690	NA	NA	NA	NA
LOC113734930	NA	NA	NA	NA	NA	NA	NA	NA	NA	NA	NA	NA	NA	NA	LOC113723085	NA	NA	NA	NA	LOC113726690	NA	NA	NA	NA
LOC113736330	NA	NA	NA	NA	NA	NA	NA	NA	NA	NA	NA	NA	NA	NA	LOC113702690	NA	NA	NA	NA	LOC113727220	NA	NA	NA	NA
LOC113722439	NA	NA	NA	NA	NA	NA	NA	NA	NA	NA	NA	NA	NA	NA	LOC113727026	NA	NA	NA	NA	LOC113704937	NA	NA	NA	NA
LOC113742288	NA	NA	NA	NA	NA	NA	NA	NA	NA	NA	NA	NA	NA	NA	LOC113702796	NA	NA	NA	NA	LOC113699329	NA	NA	NA	NA
LOC113696186	NA	NA	NA	NA	NA	NA	NA	NA	NA	NA	NA	NA	NA	NA	LOC113727220	NA	NA	NA	NA	LOC113707205	NA	NA	NA	NA
LOC113690634	NA	NA	NA	NA	NA	NA	NA	NA	NA	NA	NA	NA	NA	NA	LOC113706732	NA	NA	NA	NA	LOC113711081	NA	NA	NA	NA
LOC113691409	NA	NA	NA	NA	NA	NA	NA	NA	NA	NA	NA	NA	NA	NA	LOC113725430	NA	NA	NA	NA	LOC113738380	NA	NA	NA	NA
LOC113697788	NA	NA	NA	NA	NA	NA	NA	NA	NA	NA	NA	NA	NA	NA	LOC113699329	NA	NA	NA	NA	LOC113730720	NA	NA	NA	NA
LOC113742923	NA	NA	NA	NA	NA	NA	NA	NA	NA	NA	NA	NA	NA	NA	LOC113707205	NA	NA	NA	NA	LOC113695030	NA	NA	NA	NA
LOC113717577	NA	NA	NA	NA	NA	NA	NA	NA	NA	NA	NA	NA	NA	NA	LOC113718965	NA	NA	NA	NA	LOC113713005	NA	NA	NA	NA
LOC113742172	NA	NA	NA	NA	NA	NA	NA	NA	NA	NA	NA	NA	NA	NA	LOC113727141	NA	NA	NA	NA	LOC113725649	NA	NA	NA	NA
LOC113710341	NA	NA	NA	NA	NA	NA	NA	NA	NA	NA	NA	NA	NA	NA	LOC113730720	NA	NA	NA	NA	LOC113730061	NA	NA	NA	NA
LOC113712404	NA	NA	NA	NA	NA	NA	NA	NA	NA	NA	NA	NA	NA	NA	LOC113695030	NA	NA	NA	NA	LOC113726598	NA	NA	NA	NA
LOC113726044	NA	NA	NA	NA	NA	NA	NA	NA	NA	NA	NA	NA	NA	NA	LOC113693700	NA	NA	NA	NA	LOC113734094	NA	NA	NA	NA
LOC113714784	NA	NA	NA	NA	NA	NA	NA	NA	NA	NA	NA	NA	NA	NA	LOC113717125	NA	NA	NA	NA	LOC113731256	NA	NA	NA	NA
LOC113730232	NA	NA	NA	NA	NA	NA	NA	NA	NA	NA	NA	NA	NA	NA	LOC113725649	NA	NA	NA	NA	LOC113734772	NA	NA	NA	NA
LOC113688867	NA	NA	NA	NA	NA	NA	NA	NA	NA	NA	NA	NA	NA	NA	LOC113731179	NA	NA	NA	NA	LOC113693642	NA	NA	NA	NA
LOC113712979	NA	NA	NA	NA	NA	NA	NA	NA	NA	NA	NA	NA	NA	NA	LOC113690248	NA	NA	NA	NA	LOC113734874	NA	NA	NA	NA
LOC113690566	NA	NA	NA	NA	NA	NA	NA	NA	NA	NA	NA	NA	NA	NA	LOC113731256	NA	NA	NA	NA	LOC113728128	NA	NA	NA	NA
LOC113697138	NA	NA	NA	NA	NA	NA	NA	NA	NA	NA	NA	NA	NA	NA	LOC113693642	NA	NA	NA	NA	LOC113705601	NA	NA	NA	NA
LOC113722826	NA	NA	NA	NA	NA	NA	NA	NA	NA	NA	NA	NA	NA	NA	LOC113739708	NA	NA	NA	NA	LOC113708917	NA	NA	NA	NA
LOC113693823	NA	NA	NA	NA	NA	NA	NA	NA	NA	NA	NA	NA	NA	NA	LOC113708917	NA	NA	NA	NA	LOC113716779	NA	NA	NA	NA
LOC113732017	NA	NA	NA	NA	NA	NA	NA	NA	NA	NA	NA	NA	NA	NA	LOC113719066	NA	NA	NA	NA	LOC113712790	NA	NA	NA	NA
LOC113717651	NA	NA	NA	NA	NA	NA	NA	NA	NA	NA	NA	NA	NA	NA	LOC113742544	NA	NA	NA	NA	LOC113717054	NA	NA	NA	NA
LOC113725251	NA	NA	NA	NA	NA	NA	NA	NA	NA	NA	NA	NA	NA	NA	LOC113687969	NA	NA	NA	NA	LOC113712787	NA	NA	NA	NA
LOC113690264	NA	NA	NA	NA	NA	NA	NA	NA	NA	NA	NA	NA	NA	NA	LOC113716779	NA	NA	NA	NA	LOC113697144	NA	NA	NA	NA
LOC113709299	NA	NA	NA	NA	NA	NA	NA	NA	NA	NA	NA	NA	NA	NA	LOC113740379	NA	NA	NA	NA	LOC113708409	NA	NA	NA	NA
LOC113726401	NA	NA	NA	NA	NA	NA	NA	NA	NA	NA	NA	NA	NA	NA	LOC113710194	NA	NA	NA	NA	LOC113712683	NA	NA	NA	NA
LOC113725570	NA	NA	NA	NA	NA	NA	NA	NA	NA	NA	NA	NA	NA	NA	LOC113712787	NA	NA	NA	NA	LOC113731864	NA	NA	NA	NA
LOC113698770	NA	NA	NA	NA	NA	NA	NA	NA	NA	NA	NA	NA	NA	NA	LOC113715032	NA	NA	NA	NA	LOC113741234	NA	NA	NA	NA
LOC113699949	NA	NA	NA	NA	NA	NA	NA	NA	NA	NA	NA	NA	NA	NA	LOC113688290	NA	NA	NA	NA	LOC113696944	NA	NA	NA	NA
LOC113693638	NA	NA	NA	NA	NA	NA	NA	NA	NA	NA	NA	NA	NA	NA	LOC113737033	NA	NA	NA	NA	LOC113717878	NA	NA	NA	NA
LOC113727836	NA	NA	NA	NA	NA	NA	NA	NA	NA	NA	NA	NA	NA	NA	LOC113712683	NA	NA	NA	NA	LOC113708951	NA	NA	NA	NA
LOC113705051	NA	NA	NA	NA	NA	NA	NA	NA	NA	NA	NA	NA	NA	NA	LOC113731864	NA	NA	NA	NA	LOC113702422	NA	NA	NA	NA
LOC113702932	NA	NA	NA	NA	NA	NA	NA	NA	NA	NA	NA	NA	NA	NA	LOC113696944	NA	NA	NA	NA	LOC113717555	NA	NA	NA	NA
LOC113725925	NA	NA	NA	NA	NA	NA	NA	NA	NA	NA	NA	NA	NA	NA	LOC113725665	NA	NA	NA	NA	LOC113701907	NA	NA	NA	NA
LOC113707399	NA	NA	NA	NA	NA	NA	NA	NA	NA	NA	NA	NA	NA	NA	LOC113708951	NA	NA	NA	NA	LOC113696006	NA	NA	NA	NA
LOC113716979	NA	NA	NA	NA	NA	NA	NA	NA	NA	NA	NA	NA	NA	NA	LOC113717555	NA	NA	NA	NA	LOC113703209	NA	NA	NA	NA
LOC113690200	NA	NA	NA	NA	NA	NA	NA	NA	NA	NA	NA	NA	NA	NA	LOC113726533	NA	NA	NA	NA	LOC113733177	NA	NA	NA	NA
LOC113692774	NA	NA	NA	NA	NA	NA	NA	NA	NA	NA	NA	NA	NA	NA	LOC113701907	NA	NA	NA	NA	LOC113712805	NA	NA	NA	NA
LOC113730426	NA	NA	NA	NA	NA	NA	NA	NA	NA	NA	NA	NA	NA	NA	LOC113696006	NA	NA	NA	NA	LOC113731842	NA	NA	NA	NA
LOC113692598	NA	NA	NA	NA	NA	NA	NA	NA	NA	NA	NA	NA	NA	NA	LOC113712805	NA	NA	NA	NA	LOC113730619	NA	NA	NA	NA
LOC113742062	NA	NA	NA	NA	NA	NA	NA	NA	NA	NA	NA	NA	NA	NA	LOC113705489	NA	NA	NA	NA	LOC113727590	NA	NA	NA	NA
LOC113694682	NA	NA	NA	NA	NA	NA	NA	NA	NA	NA	NA	NA	NA	NA	LOC113730619	NA	NA	NA	NA	LOC113687952	NA	NA	NA	NA
LOC113688331	NA	NA	NA	NA	NA	NA	NA	NA	NA	NA	NA	NA	NA	NA	LOC113727590	NA	NA	NA	NA	LOC113699117	NA	NA	NA	NA
LOC113724983	NA	NA	NA	NA	NA	NA	NA	NA	NA	NA	NA	NA	NA	NA	LOC113734635	NA	NA	NA	NA	LOC113713013	NA	NA	NA	NA
LOC113699858	NA	NA	NA	NA	NA	NA	NA	NA	NA	NA	NA	NA	NA	NA	LOC113693762	NA	NA	NA	NA	LOC113690656	NA	NA	NA	NA
LOC113709627	NA	NA	NA	NA	NA	NA	NA	NA	NA	NA	NA	NA	NA	NA	LOC113719700	NA	NA	NA	NA	LOC113694612	NA	NA	NA	NA
LOC113690490	NA	NA	NA	NA	NA	NA	NA	NA	NA	NA	NA	NA	NA	NA	LOC113699117	NA	NA	NA	NA	LOC113719679	NA	NA	NA	NA
LOC113742610	NA	NA	NA	NA	NA	NA	NA	NA	NA	NA	NA	NA	NA	NA	LOC113719679	NA	NA	NA	NA	LOC113732228	NA	NA	NA	NA
LOC113705632	NA	NA	NA	NA	NA	NA	NA	NA	NA	NA	NA	NA	NA	NA	LOC113738008	NA	NA	NA	NA	LOC113738008	NA	NA	NA	NA
LOC113730458	NA	NA	NA	NA	NA	NA	NA	NA	NA	NA	NA	NA	NA	NA	LOC113736880	NA	NA	NA	NA	LOC113725173	NA	NA	NA	NA
LOC113726202	NA	NA	NA	NA	NA	NA	NA	NA	NA	NA	NA	NA	NA	NA	LOC113725173	NA	NA	NA	NA	LOC113731955	NA	NA	NA	NA
LOC113720383	NA	NA	NA	NA	NA	NA	NA	NA	NA	NA	NA	NA	NA	NA	LOC113704011	NA	NA	NA	NA	LOC113697368	NA	NA	NA	NA
LOC113697508	NA	NA	NA	NA	NA	NA	NA	NA	NA	NA	NA	NA	NA	NA	LOC113697368	NA	NA	NA	NA	LOC113719269	NA	NA	NA	NA
LOC113731649	NA	NA	NA	NA	NA	NA	NA	NA	NA	NA	NA	NA	NA	NA	LOC113698669	NA	NA	NA	NA	LOC113714992	NA	NA	NA	NA
LOC113731937	NA	NA	NA	NA	NA	NA	NA	NA	NA	NA	NA	NA	NA	NA	LOC113719269	NA	NA	NA	NA	LOC113738554	NA	NA	NA	NA
LOC113732551	NA	NA	NA	NA	NA	NA	NA	NA	NA	NA	NA	NA	NA	NA	LOC113691683	NA	NA	NA	NA	LOC113711001	NA	NA	NA	NA
LOC113734226	NA	NA	NA	NA	NA	NA	NA	NA	NA	NA	NA	NA	NA	NA	LOC113711001	NA	NA	NA	NA	LOC113719365	NA	NA	NA	NA
LOC113698270	NA	NA	NA	NA	NA	NA	NA	NA	NA	NA	NA	NA	NA	NA	LOC113697070	NA	NA	NA	NA	LOC113726768	NA	NA	NA	NA
LOC113742205	NA	NA	NA	NA	NA	NA	NA	NA	NA	NA	NA	NA	NA	NA	LOC113726768	NA	NA	NA	NA	LOC113722638	NA	NA	NA	NA
LOC113693814	NA	NA	NA	NA	NA	NA	NA	NA	NA	NA	NA	NA	NA	NA	LOC113738160	NA	NA	NA	NA	LOC113703378	NA	NA	NA	NA
LOC113690957	NA	NA	NA	NA	NA	NA	NA	NA	NA	NA	NA	NA	NA	NA	LOC113736048	NA	NA	NA	NA	LOC113711005	NA	NA	NA	NA
LOC113728833	NA	NA	NA	NA	NA	NA	NA	NA	NA	NA	NA	NA	NA	NA	LOC113734384	NA	NA	NA	NA	LOC113742779	NA	NA	NA	NA
LOC113710293	NA	NA	NA	NA	NA	NA	NA	NA	NA	NA	NA	NA	NA	NA	LOC113698115	NA	NA	NA	NA	LOC113703566	NA	NA	NA	NA
LOC113701779	NA	NA	NA	NA	NA	NA	NA	NA	NA	NA	NA	NA	NA	NA	LOC113690662	NA	NA	NA	NA	LOC113719358	NA	NA	NA	NA
LOC113708699	NA	NA	NA	NA	NA	NA	NA	NA	NA	NA	NA	NA	NA	NA	LOC113696635	NA	NA	NA	NA	LOC113698115	NA	NA	NA	NA
LOC113727371	NA	NA	NA	NA	NA	NA	NA	NA	NA	NA	NA	NA	NA	NA	LOC113694008	NA	NA	NA	NA	LOC113701012	NA	NA	NA	NA
LOC113691369	NA	NA	NA	NA	NA	NA	NA	NA	NA	NA	NA	NA	NA	NA	LOC113734051	NA	NA	NA	NA	LOC113714526	NA	NA	NA	NA
LOC113714861	NA	NA	NA	NA	NA	NA	NA	NA	NA	NA	NA	NA	NA	NA	LOC113734988	NA	NA	NA	NA	LOC113743489	NA	NA	NA	NA
LOC113708575	NA	NA	NA	NA	NA	NA	NA	NA	NA	NA	NA	NA	NA	NA	LOC113725254	NA	NA	NA	NA	LOC113694789	NA	NA	NA	NA
LOC113730025	NA	NA	NA	NA	NA	NA	NA	NA	NA	NA	NA	NA	NA	NA	LOC113715708	NA	NA	NA	NA	LOC113722549	NA	NA	NA	NA
LOC113701598	NA	NA	NA	NA	NA	NA	NA	NA	NA	NA	NA	NA	NA	NA	LOC113712937	NA	NA	NA	NA	LOC113741361	NA	NA	NA	NA
LOC113688762	NA	NA	NA	NA	NA	NA	NA	NA	NA	NA	NA	NA	NA	NA	LOC113698689	NA	NA	NA	NA	LOC113732963	NA	NA	NA	NA
LOC113695483	NA	NA	NA	NA	NA	NA	NA	NA	NA	NA	NA	NA	NA	NA	LOC113709278	NA	NA	NA	NA	LOC113708974	NA	NA	NA	NA
LOC113722714	NA	NA	NA	NA	NA	NA	NA	NA	NA	NA	NA	NA	NA	NA	LOC113707685	NA	NA	NA	NA	LOC113694008	NA	NA	NA	NA
LOC113725464	NA	NA	NA	NA	NA	NA	NA	NA	NA	NA	NA	NA	NA	NA	LOC113733843	NA	NA	NA	NA	LOC113734051	NA	NA	NA	NA
LOC113693970	NA	NA	NA	NA	NA	NA	NA	NA	NA	NA	NA	NA	NA	NA	LOC113716463	NA	NA	NA	NA	LOC113742096	NA	NA	NA	NA
LOC113705456	NA	NA	NA	NA	NA	NA	NA	NA	NA	NA	NA	NA	NA	NA	LOC113725466	NA	NA	NA	NA	LOC113727581	NA	NA	NA	NA
LOC113711670	NA	NA	NA	NA	NA	NA	NA	NA	NA	NA	NA	NA	NA	NA	LOC113741741	NA	NA	NA	NA	LOC113687976	NA	NA	NA	NA
LOC113713382	NA	NA	NA	NA	NA	NA	NA	NA	NA	NA	NA	NA	NA	NA	LOC113697192	NA	NA	NA	NA	LOC113725254	NA	NA	NA	NA
LOC113692823	NA	NA	NA	NA	NA	NA	NA	NA	NA	NA	NA	NA	NA	NA	LOC113717148	NA	NA	NA	NA	LOC113701129	NA	NA	NA	NA
LOC113695974	NA	NA	NA	NA	NA	NA	NA	NA	NA	NA	NA	NA	NA	NA	LOC113713994	NA	NA	NA	NA	LOC113715133	NA	NA	NA	NA
LOC113735157	NA	NA	NA	NA	NA	NA	NA	NA	NA	NA	NA	NA	NA	NA	LOC113690337	NA	NA	NA	NA	LOC113727169	NA	NA	NA	NA
LOC113716816	NA	NA	NA	NA	NA	NA	NA	NA	NA	NA	NA	NA	NA	NA	LOC113707759	NA	NA	NA	NA	LOC113729888	NA	NA	NA	NA
LOC113704180	NA	NA	NA	NA	NA	NA	NA	NA	NA	NA	NA	NA	NA	NA	LOC113731226	NA	NA	NA	NA	LOC113743533	NA	NA	NA	NA
LOC113738165	NA	NA	NA	NA	NA	NA	NA	NA	NA	NA	NA	NA	NA	NA	LOC113726594	NA	NA	NA	NA	LOC113706844	NA	NA	NA	NA
LOC113726950	NA	NA	NA	NA	NA	NA	NA	NA	NA	NA	NA	NA	NA	NA	NA	NA	NA	NA	NA	LOC113741741	NA	NA	NA	NA
LOC113690319	NA	NA	NA	NA	NA	NA	NA	NA	NA	NA	NA	NA	NA	NA	NA	NA	NA	NA	NA	LOC113732465	NA	NA	NA	NA
LOC113740182	NA	NA	NA	NA	NA	NA	NA	NA	NA	NA	NA	NA	NA	NA	NA	NA	NA	NA	NA	LOC113698963	NA	NA	NA	NA
LOC113695837	NA	NA	NA	NA	NA	NA	NA	NA	NA	NA	NA	NA	NA	NA	NA	NA	NA	NA	NA	LOC113697137	NA	NA	NA	NA
LOC113690321	NA	NA	NA	NA	NA	NA	NA	NA	NA	NA	NA	NA	NA	NA	NA	NA	NA	NA	NA	LOC113734473	NA	NA	NA	NA
LOC113696031	NA	NA	NA	NA	NA	NA	NA	NA	NA	NA	NA	NA	NA	NA	NA	NA	NA	NA	NA	LOC113707759	NA	NA	NA	NA
LOC113714713	NA	NA	NA	NA	NA	NA	NA	NA	NA	NA	NA	NA	NA	NA	NA	NA	NA	NA	NA	LOC113717276	NA	NA	NA	NA
LOC113702001	NA	NA	NA	NA	NA	NA	NA	NA	NA	NA	NA	NA	NA	NA	NA	NA	NA	NA	NA	LOC113736818	NA	NA	NA	NA
LOC113701691	NA	NA	NA	NA	NA	NA	NA	NA	NA	NA	NA	NA	NA	NA	NA	NA	NA	NA	NA	NA	NA	NA	NA	NA
LOC113691446	NA	NA	NA	NA	NA	NA	NA	NA	NA	NA	NA	NA	NA	NA	NA	NA	NA	NA	NA	NA	NA	NA	NA	NA
LOC113712819	NA	NA	NA	NA	NA	NA	NA	NA	NA	NA	NA	NA	NA	NA	NA	NA	NA	NA	NA	NA	NA	NA	NA	NA
LOC113704179	NA	NA	NA	NA	NA	NA	NA	NA	NA	NA	NA	NA	NA	NA	NA	NA	NA	NA	NA	NA	NA	NA	NA	NA
LOC113736426	NA	NA	NA	NA	NA	NA	NA	NA	NA	NA	NA	NA	NA	NA	NA	NA	NA	NA	NA	NA	NA	NA	NA	NA
LOC113731102	NA	NA	NA	NA	NA	NA	NA	NA	NA	NA	NA	NA	NA	NA	NA	NA	NA	NA	NA	NA	NA	NA	NA	NA
LOC113699300	NA	NA	NA	NA	NA	NA	NA	NA	NA	NA	NA	NA	NA	NA	NA	NA	NA	NA	NA	NA	NA	NA	NA	NA
LOC113727409	NA	NA	NA	NA	NA	NA	NA	NA	NA	NA	NA	NA	NA	NA	NA	NA	NA	NA	NA	NA	NA	NA	NA	NA
LOC113708510	NA	NA	NA	NA	NA	NA	NA	NA	NA	NA	NA	NA	NA	NA	NA	NA	NA	NA	NA	NA	NA	NA	NA	NA
LOC113710215	NA	NA	NA	NA	NA	NA	NA	NA	NA	NA	NA	NA	NA	NA	NA	NA	NA	NA	NA	NA	NA	NA	NA	NA
LOC113710274	NA	NA	NA	NA	NA	NA	NA	NA	NA	NA	NA	NA	NA	NA	NA	NA	NA	NA	NA	NA	NA	NA	NA	NA
LOC113690508	NA	NA	NA	NA	NA	NA	NA	NA	NA	NA	NA	NA	NA	NA	NA	NA	NA	NA	NA	NA	NA	NA	NA	NA
LOC113734183	NA	NA	NA	NA	NA	NA	NA	NA	NA	NA	NA	NA	NA	NA	NA	NA	NA	NA	NA	NA	NA	NA	NA	NA
LOC113712896	NA	NA	NA	NA	NA	NA	NA	NA	NA	NA	NA	NA	NA	NA	NA	NA	NA	NA	NA	NA	NA	NA	NA	NA
LOC113719674	NA	NA	NA	NA	NA	NA	NA	NA	NA	NA	NA	NA	NA	NA	NA	NA	NA	NA	NA	NA	NA	NA	NA	NA
LOC113695110	NA	NA	NA	NA	NA	NA	NA	NA	NA	NA	NA	NA	NA	NA	NA	NA	NA	NA	NA	NA	NA	NA	NA	NA
LOC113699303	NA	NA	NA	NA	NA	NA	NA	NA	NA	NA	NA	NA	NA	NA	NA	NA	NA	NA	NA	NA	NA	NA	NA	NA
LOC113715153	NA	NA	NA	NA	NA	NA	NA	NA	NA	NA	NA	NA	NA	NA	NA	NA	NA	NA	NA	NA	NA	NA	NA	NA
LOC113701884	NA	NA	NA	NA	NA	NA	NA	NA	NA	NA	NA	NA	NA	NA	NA	NA	NA	NA	NA	NA	NA	NA	NA	NA
LOC113726070	NA	NA	NA	NA	NA	NA	NA	NA	NA	NA	NA	NA	NA	NA	NA	NA	NA	NA	NA	NA	NA	NA	NA	NA
LOC113691422	NA	NA	NA	NA	NA	NA	NA	NA	NA	NA	NA	NA	NA	NA	NA	NA	NA	NA	NA	NA	NA	NA	NA	NA
LOC113728057	NA	NA	NA	NA	NA	NA	NA	NA	NA	NA	NA	NA	NA	NA	NA	NA	NA	NA	NA	NA	NA	NA	NA	NA
LOC113742667	NA	NA	NA	NA	NA	NA	NA	NA	NA	NA	NA	NA	NA	NA	NA	NA	NA	NA	NA	NA	NA	NA	NA	NA
LOC113741755	NA	NA	NA	NA	NA	NA	NA	NA	NA	NA	NA	NA	NA	NA	NA	NA	NA	NA	NA	NA	NA	NA	NA	NA
LOC113730015	NA	NA	NA	NA	NA	NA	NA	NA	NA	NA	NA	NA	NA	NA	NA	NA	NA	NA	NA	NA	NA	NA	NA	NA
LOC113697900	NA	NA	NA	NA	NA	NA	NA	NA	NA	NA	NA	NA	NA	NA	NA	NA	NA	NA	NA	NA	NA	NA	NA	NA
LOC113691317	NA	NA	NA	NA	NA	NA	NA	NA	NA	NA	NA	NA	NA	NA	NA	NA	NA	NA	NA	NA	NA	NA	NA	NA
LOC113701277	NA	NA	NA	NA	NA	NA	NA	NA	NA	NA	NA	NA	NA	NA	NA	NA	NA	NA	NA	NA	NA	NA	NA	NA
LOC113739584	NA	NA	NA	NA	NA	NA	NA	NA	NA	NA	NA	NA	NA	NA	NA	NA	NA	NA	NA	NA	NA	NA	NA	NA
LOC113702731	NA	NA	NA	NA	NA	NA	NA	NA	NA	NA	NA	NA	NA	NA	NA	NA	NA	NA	NA	NA	NA	NA	NA	NA
LOC113711662	NA	NA	NA	NA	NA	NA	NA	NA	NA	NA	NA	NA	NA	NA	NA	NA	NA	NA	NA	NA	NA	NA	NA	NA
LOC113697120	NA	NA	NA	NA	NA	NA	NA	NA	NA	NA	NA	NA	NA	NA	NA	NA	NA	NA	NA	NA	NA	NA	NA	NA
LOC113704318	NA	NA	NA	NA	NA	NA	NA	NA	NA	NA	NA	NA	NA	NA	NA	NA	NA	NA	NA	NA	NA	NA	NA	NA
LOC113738078	NA	NA	NA	NA	NA	NA	NA	NA	NA	NA	NA	NA	NA	NA	NA	NA	NA	NA	NA	NA	NA	NA	NA	NA
LOC113732683	NA	NA	NA	NA	NA	NA	NA	NA	NA	NA	NA	NA	NA	NA	NA	NA	NA	NA	NA	NA	NA	NA	NA	NA
LOC113710497	NA	NA	NA	NA	NA	NA	NA	NA	NA	NA	NA	NA	NA	NA	NA	NA	NA	NA	NA	NA	NA	NA	NA	NA
LOC113714878	NA	NA	NA	NA	NA	NA	NA	NA	NA	NA	NA	NA	NA	NA	NA	NA	NA	NA	NA	NA	NA	NA	NA	NA
LOC113693828	NA	NA	NA	NA	NA	NA	NA	NA	NA	NA	NA	NA	NA	NA	NA	NA	NA	NA	NA	NA	NA	NA	NA	NA
LOC113696985	NA	NA	NA	NA	NA	NA	NA	NA	NA	NA	NA	NA	NA	NA	NA	NA	NA	NA	NA	NA	NA	NA	NA	NA
LOC113710462	NA	NA	NA	NA	NA	NA	NA	NA	NA	NA	NA	NA	NA	NA	NA	NA	NA	NA	NA	NA	NA	NA	NA	NA
LOC113690771	NA	NA	NA	NA	NA	NA	NA	NA	NA	NA	NA	NA	NA	NA	NA	NA	NA	NA	NA	NA	NA	NA	NA	NA
LOC113697365	NA	NA	NA	NA	NA	NA	NA	NA	NA	NA	NA	NA	NA	NA	NA	NA	NA	NA	NA	NA	NA	NA	NA	NA
LOC113725391	NA	NA	NA	NA	NA	NA	NA	NA	NA	NA	NA	NA	NA	NA	NA	NA	NA	NA	NA	NA	NA	NA	NA	NA
LOC113741579	NA	NA	NA	NA	NA	NA	NA	NA	NA	NA	NA	NA	NA	NA	NA	NA	NA	NA	NA	NA	NA	NA	NA	NA
LOC113719386	NA	NA	NA	NA	NA	NA	NA	NA	NA	NA	NA	NA	NA	NA	NA	NA	NA	NA	NA	NA	NA	NA	NA	NA
LOC113739694	NA	NA	NA	NA	NA	NA	NA	NA	NA	NA	NA	NA	NA	NA	NA	NA	NA	NA	NA	NA	NA	NA	NA	NA
LOC113732573	NA	NA	NA	NA	NA	NA	NA	NA	NA	NA	NA	NA	NA	NA	NA	NA	NA	NA	NA	NA	NA	NA	NA	NA
LOC113692669	NA	NA	NA	NA	NA	NA	NA	NA	NA	NA	NA	NA	NA	NA	NA	NA	NA	NA	NA	NA	NA	NA	NA	NA
LOC113739861	NA	NA	NA	NA	NA	NA	NA	NA	NA	NA	NA	NA	NA	NA	NA	NA	NA	NA	NA	NA	NA	NA	NA	NA
LOC113729913	NA	NA	NA	NA	NA	NA	NA	NA	NA	NA	NA	NA	NA	NA	NA	NA	NA	NA	NA	NA	NA	NA	NA	NA
LOC113706958	NA	NA	NA	NA	NA	NA	NA	NA	NA	NA	NA	NA	NA	NA	NA	NA	NA	NA	NA	NA	NA	NA	NA	NA
LOC113734298	NA	NA	NA	NA	NA	NA	NA	NA	NA	NA	NA	NA	NA	NA	NA	NA	NA	NA	NA	NA	NA	NA	NA	NA
LOC113712228	NA	NA	NA	NA	NA	NA	NA	NA	NA	NA	NA	NA	NA	NA	NA	NA	NA	NA	NA	NA	NA	NA	NA	NA
LOC113731836	NA	NA	NA	NA	NA	NA	NA	NA	NA	NA	NA	NA	NA	NA	NA	NA	NA	NA	NA	NA	NA	NA	NA	NA
LOC113715222	NA	NA	NA	NA	NA	NA	NA	NA	NA	NA	NA	NA	NA	NA	NA	NA	NA	NA	NA	NA	NA	NA	NA	NA
LOC113719301	NA	NA	NA	NA	NA	NA	NA	NA	NA	NA	NA	NA	NA	NA	NA	NA	NA	NA	NA	NA	NA	NA	NA	NA
LOC113707879	NA	NA	NA	NA	NA	NA	NA	NA	NA	NA	NA	NA	NA	NA	NA	NA	NA	NA	NA	NA	NA	NA	NA	NA
LOC113697260	NA	NA	NA	NA	NA	NA	NA	NA	NA	NA	NA	NA	NA	NA	NA	NA	NA	NA	NA	NA	NA	NA	NA	NA
LOC113743461	NA	NA	NA	NA	NA	NA	NA	NA	NA	NA	NA	NA	NA	NA	NA	NA	NA	NA	NA	NA	NA	NA	NA	NA
LOC113696975	NA	NA	NA	NA	NA	NA	NA	NA	NA	NA	NA	NA	NA	NA	NA	NA	NA	NA	NA	NA	NA	NA	NA	NA
LOC113709614	NA	NA	NA	NA	NA	NA	NA	NA	NA	NA	NA	NA	NA	NA	NA	NA	NA	NA	NA	NA	NA	NA	NA	NA
LOC113703135	NA	NA	NA	NA	NA	NA	NA	NA	NA	NA	NA	NA	NA	NA	NA	NA	NA	NA	NA	NA	NA	NA	NA	NA
LOC113712921	NA	NA	NA	NA	NA	NA	NA	NA	NA	NA	NA	NA	NA	NA	NA	NA	NA	NA	NA	NA	NA	NA	NA	NA
LOC113698692	NA	NA	NA	NA	NA	NA	NA	NA	NA	NA	NA	NA	NA	NA	NA	NA	NA	NA	NA	NA	NA	NA	NA	NA
LOC113710427	NA	NA	NA	NA	NA	NA	NA	NA	NA	NA	NA	NA	NA	NA	NA	NA	NA	NA	NA	NA	NA	NA	NA	NA
LOC113713197	NA	NA	NA	NA	NA	NA	NA	NA	NA	NA	NA	NA	NA	NA	NA	NA	NA	NA	NA	NA	NA	NA	NA	NA
LOC113698470	NA	NA	NA	NA	NA	NA	NA	NA	NA	NA	NA	NA	NA	NA	NA	NA	NA	NA	NA	NA	NA	NA	NA	NA
LOC113735226	NA	NA	NA	NA	NA	NA	NA	NA	NA	NA	NA	NA	NA	NA	NA	NA	NA	NA	NA	NA	NA	NA	NA	NA
LOC113712166	NA	NA	NA	NA	NA	NA	NA	NA	NA	NA	NA	NA	NA	NA	NA	NA	NA	NA	NA	NA	NA	NA	NA	NA
LOC113742696	NA	NA	NA	NA	NA	NA	NA	NA	NA	NA	NA	NA	NA	NA	NA	NA	NA	NA	NA	NA	NA	NA	NA	NA
LOC113696184	NA	NA	NA	NA	NA	NA	NA	NA	NA	NA	NA	NA	NA	NA	NA	NA	NA	NA	NA	NA	NA	NA	NA	NA
LOC113735145	NA	NA	NA	NA	NA	NA	NA	NA	NA	NA	NA	NA	NA	NA	NA	NA	NA	NA	NA	NA	NA	NA	NA	NA
LOC113725065	NA	NA	NA	NA	NA	NA	NA	NA	NA	NA	NA	NA	NA	NA	NA	NA	NA	NA	NA	NA	NA	NA	NA	NA
LOC113710385	NA	NA	NA	NA	NA	NA	NA	NA	NA	NA	NA	NA	NA	NA	NA	NA	NA	NA	NA	NA	NA	NA	NA	NA
LOC113727251	NA	NA	NA	NA	NA	NA	NA	NA	NA	NA	NA	NA	NA	NA	NA	NA	NA	NA	NA	NA	NA	NA	NA	NA
LOC113699079	NA	NA	NA	NA	NA	NA	NA	NA	NA	NA	NA	NA	NA	NA	NA	NA	NA	NA	NA	NA	NA	NA	NA	NA
LOC113730019	NA	NA	NA	NA	NA	NA	NA	NA	NA	NA	NA	NA	NA	NA	NA	NA	NA	NA	NA	NA	NA	NA	NA	NA
LOC113701511	NA	NA	NA	NA	NA	NA	NA	NA	NA	NA	NA	NA	NA	NA	NA	NA	NA	NA	NA	NA	NA	NA	NA	NA
LOC113734944	NA	NA	NA	NA	NA	NA	NA	NA	NA	NA	NA	NA	NA	NA	NA	NA	NA	NA	NA	NA	NA	NA	NA	NA
LOC113732879	NA	NA	NA	NA	NA	NA	NA	NA	NA	NA	NA	NA	NA	NA	NA	NA	NA	NA	NA	NA	NA	NA	NA	NA
LOC113740011	NA	NA	NA	NA	NA	NA	NA	NA	NA	NA	NA	NA	NA	NA	NA	NA	NA	NA	NA	NA	NA	NA	NA	NA
LOC113729966	NA	NA	NA	NA	NA	NA	NA	NA	NA	NA	NA	NA	NA	NA	NA	NA	NA	NA	NA	NA	NA	NA	NA	NA
LOC113711088	NA	NA	NA	NA	NA	NA	NA	NA	NA	NA	NA	NA	NA	NA	NA	NA	NA	NA	NA	NA	NA	NA	NA	NA
LOC113710533	NA	NA	NA	NA	NA	NA	NA	NA	NA	NA	NA	NA	NA	NA	NA	NA	NA	NA	NA	NA	NA	NA	NA	NA
LOC113718232	NA	NA	NA	NA	NA	NA	NA	NA	NA	NA	NA	NA	NA	NA	NA	NA	NA	NA	NA	NA	NA	NA	NA	NA
LOC113690670	NA	NA	NA	NA	NA	NA	NA	NA	NA	NA	NA	NA	NA	NA	NA	NA	NA	NA	NA	NA	NA	NA	NA	NA
LOC113733819	NA	NA	NA	NA	NA	NA	NA	NA	NA	NA	NA	NA	NA	NA	NA	NA	NA	NA	NA	NA	NA	NA	NA	NA
LOC113731800	NA	NA	NA	NA	NA	NA	NA	NA	NA	NA	NA	NA	NA	NA	NA	NA	NA	NA	NA	NA	NA	NA	NA	NA
LOC113714941	NA	NA	NA	NA	NA	NA	NA	NA	NA	NA	NA	NA	NA	NA	NA	NA	NA	NA	NA	NA	NA	NA	NA	NA
LOC113727045	NA	NA	NA	NA	NA	NA	NA	NA	NA	NA	NA	NA	NA	NA	NA	NA	NA	NA	NA	NA	NA	NA	NA	NA
LOC113697289	NA	NA	NA	NA	NA	NA	NA	NA	NA	NA	NA	NA	NA	NA	NA	NA	NA	NA	NA	NA	NA	NA	NA	NA
LOC113704298	NA	NA	NA	NA	NA	NA	NA	NA	NA	NA	NA	NA	NA	NA	NA	NA	NA	NA	NA	NA	NA	NA	NA	NA
LOC113734637	NA	NA	NA	NA	NA	NA	NA	NA	NA	NA	NA	NA	NA	NA	NA	NA	NA	NA	NA	NA	NA	NA	NA	NA
LOC113713496	NA	NA	NA	NA	NA	NA	NA	NA	NA	NA	NA	NA	NA	NA	NA	NA	NA	NA	NA	NA	NA	NA	NA	NA
LOC113699972	NA	NA	NA	NA	NA	NA	NA	NA	NA	NA	NA	NA	NA	NA	NA	NA	NA	NA	NA	NA	NA	NA	NA	NA
LOC113701914	NA	NA	NA	NA	NA	NA	NA	NA	NA	NA	NA	NA	NA	NA	NA	NA	NA	NA	NA	NA	NA	NA	NA	NA
LOC113690875	NA	NA	NA	NA	NA	NA	NA	NA	NA	NA	NA	NA	NA	NA	NA	NA	NA	NA	NA	NA	NA	NA	NA	NA
LOC113703781	NA	NA	NA	NA	NA	NA	NA	NA	NA	NA	NA	NA	NA	NA	NA	NA	NA	NA	NA	NA	NA	NA	NA	NA
LOC113725245	NA	NA	NA	NA	NA	NA	NA	NA	NA	NA	NA	NA	NA	NA	NA	NA	NA	NA	NA	NA	NA	NA	NA	NA
LOC113701588	NA	NA	NA	NA	NA	NA	NA	NA	NA	NA	NA	NA	NA	NA	NA	NA	NA	NA	NA	NA	NA	NA	NA	NA
LOC113725340	NA	NA	NA	NA	NA	NA	NA	NA	NA	NA	NA	NA	NA	NA	NA	NA	NA	NA	NA	NA	NA	NA	NA	NA
LOC113692372	NA	NA	NA	NA	NA	NA	NA	NA	NA	NA	NA	NA	NA	NA	NA	NA	NA	NA	NA	NA	NA	NA	NA	NA
LOC113702819	NA	NA	NA	NA	NA	NA	NA	NA	NA	NA	NA	NA	NA	NA	NA	NA	NA	NA	NA	NA	NA	NA	NA	NA
LOC113696949	NA	NA	NA	NA	NA	NA	NA	NA	NA	NA	NA	NA	NA	NA	NA	NA	NA	NA	NA	NA	NA	NA	NA	NA
LOC113694784	NA	NA	NA	NA	NA	NA	NA	NA	NA	NA	NA	NA	NA	NA	NA	NA	NA	NA	NA	NA	NA	NA	NA	NA
LOC113710509	NA	NA	NA	NA	NA	NA	NA	NA	NA	NA	NA	NA	NA	NA	NA	NA	NA	NA	NA	NA	NA	NA	NA	NA
LOC113727655	NA	NA	NA	NA	NA	NA	NA	NA	NA	NA	NA	NA	NA	NA	NA	NA	NA	NA	NA	NA	NA	NA	NA	NA
LOC113729871	NA	NA	NA	NA	NA	NA	NA	NA	NA	NA	NA	NA	NA	NA	NA	NA	NA	NA	NA	NA	NA	NA	NA	NA
LOC113743441	NA	NA	NA	NA	NA	NA	NA	NA	NA	NA	NA	NA	NA	NA	NA	NA	NA	NA	NA	NA	NA	NA	NA	NA
LOC113710864	NA	NA	NA	NA	NA	NA	NA	NA	NA	NA	NA	NA	NA	NA	NA	NA	NA	NA	NA	NA	NA	NA	NA	NA
LOC113734466	NA	NA	NA	NA	NA	NA	NA	NA	NA	NA	NA	NA	NA	NA	NA	NA	NA	NA	NA	NA	NA	NA	NA	NA
LOC113695841	NA	NA	NA	NA	NA	NA	NA	NA	NA	NA	NA	NA	NA	NA	NA	NA	NA	NA	NA	NA	NA	NA	NA	NA
LOC113724962	NA	NA	NA	NA	NA	NA	NA	NA	NA	NA	NA	NA	NA	NA	NA	NA	NA	NA	NA	NA	NA	NA	NA	NA
LOC113733163	NA	NA	NA	NA	NA	NA	NA	NA	NA	NA	NA	NA	NA	NA	NA	NA	NA	NA	NA	NA	NA	NA	NA	NA
LOC113733337	NA	NA	NA	NA	NA	NA	NA	NA	NA	NA	NA	NA	NA	NA	NA	NA	NA	NA	NA	NA	NA	NA	NA	NA
LOC113734080	NA	NA	NA	NA	NA	NA	NA	NA	NA	NA	NA	NA	NA	NA	NA	NA	NA	NA	NA	NA	NA	NA	NA	NA
LOC113703626	NA	NA	NA	NA	NA	NA	NA	NA	NA	NA	NA	NA	NA	NA	NA	NA	NA	NA	NA	NA	NA	NA	NA	NA
LOC113733878	NA	NA	NA	NA	NA	NA	NA	NA	NA	NA	NA	NA	NA	NA	NA	NA	NA	NA	NA	NA	NA	NA	NA	NA
LOC113719186	NA	NA	NA	NA	NA	NA	NA	NA	NA	NA	NA	NA	NA	NA	NA	NA	NA	NA	NA	NA	NA	NA	NA	NA
LOC113714815	NA	NA	NA	NA	NA	NA	NA	NA	NA	NA	NA	NA	NA	NA	NA	NA	NA	NA	NA	NA	NA	NA	NA	NA
LOC113728213	NA	NA	NA	NA	NA	NA	NA	NA	NA	NA	NA	NA	NA	NA	NA	NA	NA	NA	NA	NA	NA	NA	NA	NA
LOC113716848	NA	NA	NA	NA	NA	NA	NA	NA	NA	NA	NA	NA	NA	NA	NA	NA	NA	NA	NA	NA	NA	NA	NA	NA
LOC113734773	NA	NA	NA	NA	NA	NA	NA	NA	NA	NA	NA	NA	NA	NA	NA	NA	NA	NA	NA	NA	NA	NA	NA	NA
LOC113714824	NA	NA	NA	NA	NA	NA	NA	NA	NA	NA	NA	NA	NA	NA	NA	NA	NA	NA	NA	NA	NA	NA	NA	NA
LOC113702767	NA	NA	NA	NA	NA	NA	NA	NA	NA	NA	NA	NA	NA	NA	NA	NA	NA	NA	NA	NA	NA	NA	NA	NA
LOC113706953	NA	NA	NA	NA	NA	NA	NA	NA	NA	NA	NA	NA	NA	NA	NA	NA	NA	NA	NA	NA	NA	NA	NA	NA
LOC113731062	NA	NA	NA	NA	NA	NA	NA	NA	NA	NA	NA	NA	NA	NA	NA	NA	NA	NA	NA	NA	NA	NA	NA	NA
LOC113704251	NA	NA	NA	NA	NA	NA	NA	NA	NA	NA	NA	NA	NA	NA	NA	NA	NA	NA	NA	NA	NA	NA	NA	NA
LOC113713315	NA	NA	NA	NA	NA	NA	NA	NA	NA	NA	NA	NA	NA	NA	NA	NA	NA	NA	NA	NA	NA	NA	NA	NA
LOC113736607	NA	NA	NA	NA	NA	NA	NA	NA	NA	NA	NA	NA	NA	NA	NA	NA	NA	NA	NA	NA	NA	NA	NA	NA
LOC113698522	NA	NA	NA	NA	NA	NA	NA	NA	NA	NA	NA	NA	NA	NA	NA	NA	NA	NA	NA	NA	NA	NA	NA	NA
LOC113742969	NA	NA	NA	NA	NA	NA	NA	NA	NA	NA	NA	NA	NA	NA	NA	NA	NA	NA	NA	NA	NA	NA	NA	NA
LOC113696027	NA	NA	NA	NA	NA	NA	NA	NA	NA	NA	NA	NA	NA	NA	NA	NA	NA	NA	NA	NA	NA	NA	NA	NA
LOC113699686	NA	NA	NA	NA	NA	NA	NA	NA	NA	NA	NA	NA	NA	NA	NA	NA	NA	NA	NA	NA	NA	NA	NA	NA
LOC113707410	NA	NA	NA	NA	NA	NA	NA	NA	NA	NA	NA	NA	NA	NA	NA	NA	NA	NA	NA	NA	NA	NA	NA	NA
LOC113717695	NA	NA	NA	NA	NA	NA	NA	NA	NA	NA	NA	NA	NA	NA	NA	NA	NA	NA	NA	NA	NA	NA	NA	NA
LOC113718952	NA	NA	NA	NA	NA	NA	NA	NA	NA	NA	NA	NA	NA	NA	NA	NA	NA	NA	NA	NA	NA	NA	NA	NA
LOC113731969	NA	NA	NA	NA	NA	NA	NA	NA	NA	NA	NA	NA	NA	NA	NA	NA	NA	NA	NA	NA	NA	NA	NA	NA
LOC113726280	NA	NA	NA	NA	NA	NA	NA	NA	NA	NA	NA	NA	NA	NA	NA	NA	NA	NA	NA	NA	NA	NA	NA	NA
LOC113741757	NA	NA	NA	NA	NA	NA	NA	NA	NA	NA	NA	NA	NA	NA	NA	NA	NA	NA	NA	NA	NA	NA	NA	NA
LOC113698469	NA	NA	NA	NA	NA	NA	NA	NA	NA	NA	NA	NA	NA	NA	NA	NA	NA	NA	NA	NA	NA	NA	NA	NA
LOC113738118	NA	NA	NA	NA	NA	NA	NA	NA	NA	NA	NA	NA	NA	NA	NA	NA	NA	NA	NA	NA	NA	NA	NA	NA
LOC113731547	NA	NA	NA	NA	NA	NA	NA	NA	NA	NA	NA	NA	NA	NA	NA	NA	NA	NA	NA	NA	NA	NA	NA	NA
LOC113702897	NA	NA	NA	NA	NA	NA	NA	NA	NA	NA	NA	NA	NA	NA	NA	NA	NA	NA	NA	NA	NA	NA	NA	NA
LOC113692695	NA	NA	NA	NA	NA	NA	NA	NA	NA	NA	NA	NA	NA	NA	NA	NA	NA	NA	NA	NA	NA	NA	NA	NA
LOC113695220	NA	NA	NA	NA	NA	NA	NA	NA	NA	NA	NA	NA	NA	NA	NA	NA	NA	NA	NA	NA	NA	NA	NA	NA
LOC113732089	NA	NA	NA	NA	NA	NA	NA	NA	NA	NA	NA	NA	NA	NA	NA	NA	NA	NA	NA	NA	NA	NA	NA	NA
LOC113724999	NA	NA	NA	NA	NA	NA	NA	NA	NA	NA	NA	NA	NA	NA	NA	NA	NA	NA	NA	NA	NA	NA	NA	NA
LOC113741523	NA	NA	NA	NA	NA	NA	NA	NA	NA	NA	NA	NA	NA	NA	NA	NA	NA	NA	NA	NA	NA	NA	NA	NA
LOC113708912	NA	NA	NA	NA	NA	NA	NA	NA	NA	NA	NA	NA	NA	NA	NA	NA	NA	NA	NA	NA	NA	NA	NA	NA
LOC113697552	NA	NA	NA	NA	NA	NA	NA	NA	NA	NA	NA	NA	NA	NA	NA	NA	NA	NA	NA	NA	NA	NA	NA	NA
LOC113734339	NA	NA	NA	NA	NA	NA	NA	NA	NA	NA	NA	NA	NA	NA	NA	NA	NA	NA	NA	NA	NA	NA	NA	NA
LOC113736325	NA	NA	NA	NA	NA	NA	NA	NA	NA	NA	NA	NA	NA	NA	NA	NA	NA	NA	NA	NA	NA	NA	NA	NA
LOC113697488	NA	NA	NA	NA	NA	NA	NA	NA	NA	NA	NA	NA	NA	NA	NA	NA	NA	NA	NA	NA	NA	NA	NA	NA
LOC113742002	NA	NA	NA	NA	NA	NA	NA	NA	NA	NA	NA	NA	NA	NA	NA	NA	NA	NA	NA	NA	NA	NA	NA	NA
LOC113695952	NA	NA	NA	NA	NA	NA	NA	NA	NA	NA	NA	NA	NA	NA	NA	NA	NA	NA	NA	NA	NA	NA	NA	NA
LOC113692051	NA	NA	NA	NA	NA	NA	NA	NA	NA	NA	NA	NA	NA	NA	NA	NA	NA	NA	NA	NA	NA	NA	NA	NA
LOC113725362	NA	NA	NA	NA	NA	NA	NA	NA	NA	NA	NA	NA	NA	NA	NA	NA	NA	NA	NA	NA	NA	NA	NA	NA
LOC113717143	NA	NA	NA	NA	NA	NA	NA	NA	NA	NA	NA	NA	NA	NA	NA	NA	NA	NA	NA	NA	NA	NA	NA	NA
LOC113702691	NA	NA	NA	NA	NA	NA	NA	NA	NA	NA	NA	NA	NA	NA	NA	NA	NA	NA	NA	NA	NA	NA	NA	NA
LOC113706920	NA	NA	NA	NA	NA	NA	NA	NA	NA	NA	NA	NA	NA	NA	NA	NA	NA	NA	NA	NA	NA	NA	NA	NA
LOC113712433	NA	NA	NA	NA	NA	NA	NA	NA	NA	NA	NA	NA	NA	NA	NA	NA	NA	NA	NA	NA	NA	NA	NA	NA
LOC113710994	NA	NA	NA	NA	NA	NA	NA	NA	NA	NA	NA	NA	NA	NA	NA	NA	NA	NA	NA	NA	NA	NA	NA	NA
LOC113702088	NA	NA	NA	NA	NA	NA	NA	NA	NA	NA	NA	NA	NA	NA	NA	NA	NA	NA	NA	NA	NA	NA	NA	NA
LOC113719571	NA	NA	NA	NA	NA	NA	NA	NA	NA	NA	NA	NA	NA	NA	NA	NA	NA	NA	NA	NA	NA	NA	NA	NA
LOC113736806	NA	NA	NA	NA	NA	NA	NA	NA	NA	NA	NA	NA	NA	NA	NA	NA	NA	NA	NA	NA	NA	NA	NA	NA
LOC113698657	NA	NA	NA	NA	NA	NA	NA	NA	NA	NA	NA	NA	NA	NA	NA	NA	NA	NA	NA	NA	NA	NA	NA	NA
LOC113706408	NA	NA	NA	NA	NA	NA	NA	NA	NA	NA	NA	NA	NA	NA	NA	NA	NA	NA	NA	NA	NA	NA	NA	NA
LOC113707165	NA	NA	NA	NA	NA	NA	NA	NA	NA	NA	NA	NA	NA	NA	NA	NA	NA	NA	NA	NA	NA	NA	NA	NA
LOC113726410	NA	NA	NA	NA	NA	NA	NA	NA	NA	NA	NA	NA	NA	NA	NA	NA	NA	NA	NA	NA	NA	NA	NA	NA
LOC113714716	NA	NA	NA	NA	NA	NA	NA	NA	NA	NA	NA	NA	NA	NA	NA	NA	NA	NA	NA	NA	NA	NA	NA	NA
LOC113703860	NA	NA	NA	NA	NA	NA	NA	NA	NA	NA	NA	NA	NA	NA	NA	NA	NA	NA	NA	NA	NA	NA	NA	NA
LOC113719574	NA	NA	NA	NA	NA	NA	NA	NA	NA	NA	NA	NA	NA	NA	NA	NA	NA	NA	NA	NA	NA	NA	NA	NA
LOC113710436	NA	NA	NA	NA	NA	NA	NA	NA	NA	NA	NA	NA	NA	NA	NA	NA	NA	NA	NA	NA	NA	NA	NA	NA
LOC113699260	NA	NA	NA	NA	NA	NA	NA	NA	NA	NA	NA	NA	NA	NA	NA	NA	NA	NA	NA	NA	NA	NA	NA	NA
LOC113711911	NA	NA	NA	NA	NA	NA	NA	NA	NA	NA	NA	NA	NA	NA	NA	NA	NA	NA	NA	NA	NA	NA	NA	NA
LOC113738367	NA	NA	NA	NA	NA	NA	NA	NA	NA	NA	NA	NA	NA	NA	NA	NA	NA	NA	NA	NA	NA	NA	NA	NA
LOC113714623	NA	NA	NA	NA	NA	NA	NA	NA	NA	NA	NA	NA	NA	NA	NA	NA	NA	NA	NA	NA	NA	NA	NA	NA
LOC113706487	NA	NA	NA	NA	NA	NA	NA	NA	NA	NA	NA	NA	NA	NA	NA	NA	NA	NA	NA	NA	NA	NA	NA	NA
LOC113733021	NA	NA	NA	NA	NA	NA	NA	NA	NA	NA	NA	NA	NA	NA	NA	NA	NA	NA	NA	NA	NA	NA	NA	NA
LOC113702181	NA	NA	NA	NA	NA	NA	NA	NA	NA	NA	NA	NA	NA	NA	NA	NA	NA	NA	NA	NA	NA	NA	NA	NA
LOC113736978	NA	NA	NA	NA	NA	NA	NA	NA	NA	NA	NA	NA	NA	NA	NA	NA	NA	NA	NA	NA	NA	NA	NA	NA
LOC113707875	NA	NA	NA	NA	NA	NA	NA	NA	NA	NA	NA	NA	NA	NA	NA	NA	NA	NA	NA	NA	NA	NA	NA	NA
LOC113733667	NA	NA	NA	NA	NA	NA	NA	NA	NA	NA	NA	NA	NA	NA	NA	NA	NA	NA	NA	NA	NA	NA	NA	NA
LOC113698020	NA	NA	NA	NA	NA	NA	NA	NA	NA	NA	NA	NA	NA	NA	NA	NA	NA	NA	NA	NA	NA	NA	NA	NA
LOC113701255	NA	NA	NA	NA	NA	NA	NA	NA	NA	NA	NA	NA	NA	NA	NA	NA	NA	NA	NA	NA	NA	NA	NA	NA
LOC113739552	NA	NA	NA	NA	NA	NA	NA	NA	NA	NA	NA	NA	NA	NA	NA	NA	NA	NA	NA	NA	NA	NA	NA	NA
LOC113734057	NA	NA	NA	NA	NA	NA	NA	NA	NA	NA	NA	NA	NA	NA	NA	NA	NA	NA	NA	NA	NA	NA	NA	NA
LOC113699281	NA	NA	NA	NA	NA	NA	NA	NA	NA	NA	NA	NA	NA	NA	NA	NA	NA	NA	NA	NA	NA	NA	NA	NA
LOC113690413	NA	NA	NA	NA	NA	NA	NA	NA	NA	NA	NA	NA	NA	NA	NA	NA	NA	NA	NA	NA	NA	NA	NA	NA
LOC113701361	NA	NA	NA	NA	NA	NA	NA	NA	NA	NA	NA	NA	NA	NA	NA	NA	NA	NA	NA	NA	NA	NA	NA	NA
LOC113742329	NA	NA	NA	NA	NA	NA	NA	NA	NA	NA	NA	NA	NA	NA	NA	NA	NA	NA	NA	NA	NA	NA	NA	NA
LOC113727640	NA	NA	NA	NA	NA	NA	NA	NA	NA	NA	NA	NA	NA	NA	NA	NA	NA	NA	NA	NA	NA	NA	NA	NA
LOC113697164	NA	NA	NA	NA	NA	NA	NA	NA	NA	NA	NA	NA	NA	NA	NA	NA	NA	NA	NA	NA	NA	NA	NA	NA
LOC113718918	NA	NA	NA	NA	NA	NA	NA	NA	NA	NA	NA	NA	NA	NA	NA	NA	NA	NA	NA	NA	NA	NA	NA	NA
LOC113695186	NA	NA	NA	NA	NA	NA	NA	NA	NA	NA	NA	NA	NA	NA	NA	NA	NA	NA	NA	NA	NA	NA	NA	NA
LOC113730437	NA	NA	NA	NA	NA	NA	NA	NA	NA	NA	NA	NA	NA	NA	NA	NA	NA	NA	NA	NA	NA	NA	NA	NA
LOC113736332	NA	NA	NA	NA	NA	NA	NA	NA	NA	NA	NA	NA	NA	NA	NA	NA	NA	NA	NA	NA	NA	NA	NA	NA
LOC113734156	NA	NA	NA	NA	NA	NA	NA	NA	NA	NA	NA	NA	NA	NA	NA	NA	NA	NA	NA	NA	NA	NA	NA	NA
LOC113742894	NA	NA	NA	NA	NA	NA	NA	NA	NA	NA	NA	NA	NA	NA	NA	NA	NA	NA	NA	NA	NA	NA	NA	NA
LOC113708903	NA	NA	NA	NA	NA	NA	NA	NA	NA	NA	NA	NA	NA	NA	NA	NA	NA	NA	NA	NA	NA	NA	NA	NA
LOC113710445	NA	NA	NA	NA	NA	NA	NA	NA	NA	NA	NA	NA	NA	NA	NA	NA	NA	NA	NA	NA	NA	NA	NA	NA
LOC113742653	NA	NA	NA	NA	NA	NA	NA	NA	NA	NA	NA	NA	NA	NA	NA	NA	NA	NA	NA	NA	NA	NA	NA	NA
LOC113710292	NA	NA	NA	NA	NA	NA	NA	NA	NA	NA	NA	NA	NA	NA	NA	NA	NA	NA	NA	NA	NA	NA	NA	NA
LOC113718720	NA	NA	NA	NA	NA	NA	NA	NA	NA	NA	NA	NA	NA	NA	NA	NA	NA	NA	NA	NA	NA	NA	NA	NA
LOC113695282	NA	NA	NA	NA	NA	NA	NA	NA	NA	NA	NA	NA	NA	NA	NA	NA	NA	NA	NA	NA	NA	NA	NA	NA
LOC113707414	NA	NA	NA	NA	NA	NA	NA	NA	NA	NA	NA	NA	NA	NA	NA	NA	NA	NA	NA	NA	NA	NA	NA	NA
LOC113727619	NA	NA	NA	NA	NA	NA	NA	NA	NA	NA	NA	NA	NA	NA	NA	NA	NA	NA	NA	NA	NA	NA	NA	NA
LOC113694100	NA	NA	NA	NA	NA	NA	NA	NA	NA	NA	NA	NA	NA	NA	NA	NA	NA	NA	NA	NA	NA	NA	NA	NA
LOC113730806	NA	NA	NA	NA	NA	NA	NA	NA	NA	NA	NA	NA	NA	NA	NA	NA	NA	NA	NA	NA	NA	NA	NA	NA
LOC113697476	NA	NA	NA	NA	NA	NA	NA	NA	NA	NA	NA	NA	NA	NA	NA	NA	NA	NA	NA	NA	NA	NA	NA	NA
LOC113710552	NA	NA	NA	NA	NA	NA	NA	NA	NA	NA	NA	NA	NA	NA	NA	NA	NA	NA	NA	NA	NA	NA	NA	NA
LOC113713291	NA	NA	NA	NA	NA	NA	NA	NA	NA	NA	NA	NA	NA	NA	NA	NA	NA	NA	NA	NA	NA	NA	NA	NA
LOC113730227	NA	NA	NA	NA	NA	NA	NA	NA	NA	NA	NA	NA	NA	NA	NA	NA	NA	NA	NA	NA	NA	NA	NA	NA
LOC113708710	NA	NA	NA	NA	NA	NA	NA	NA	NA	NA	NA	NA	NA	NA	NA	NA	NA	NA	NA	NA	NA	NA	NA	NA
LOC113739696	NA	NA	NA	NA	NA	NA	NA	NA	NA	NA	NA	NA	NA	NA	NA	NA	NA	NA	NA	NA	NA	NA	NA	NA
LOC113727956	NA	NA	NA	NA	NA	NA	NA	NA	NA	NA	NA	NA	NA	NA	NA	NA	NA	NA	NA	NA	NA	NA	NA	NA
LOC113730429	NA	NA	NA	NA	NA	NA	NA	NA	NA	NA	NA	NA	NA	NA	NA	NA	NA	NA	NA	NA	NA	NA	NA	NA
LOC113715573	NA	NA	NA	NA	NA	NA	NA	NA	NA	NA	NA	NA	NA	NA	NA	NA	NA	NA	NA	NA	NA	NA	NA	NA
LOC113731945	NA	NA	NA	NA	NA	NA	NA	NA	NA	NA	NA	NA	NA	NA	NA	NA	NA	NA	NA	NA	NA	NA	NA	NA
LOC113737199	NA	NA	NA	NA	NA	NA	NA	NA	NA	NA	NA	NA	NA	NA	NA	NA	NA	NA	NA	NA	NA	NA	NA	NA
LOC113703906	NA	NA	NA	NA	NA	NA	NA	NA	NA	NA	NA	NA	NA	NA	NA	NA	NA	NA	NA	NA	NA	NA	NA	NA
LOC113698890	NA	NA	NA	NA	NA	NA	NA	NA	NA	NA	NA	NA	NA	NA	NA	NA	NA	NA	NA	NA	NA	NA	NA	NA
LOC113730510	NA	NA	NA	NA	NA	NA	NA	NA	NA	NA	NA	NA	NA	NA	NA	NA	NA	NA	NA	NA	NA	NA	NA	NA
LOC113714321	NA	NA	NA	NA	NA	NA	NA	NA	NA	NA	NA	NA	NA	NA	NA	NA	NA	NA	NA	NA	NA	NA	NA	NA
LOC113724961	NA	NA	NA	NA	NA	NA	NA	NA	NA	NA	NA	NA	NA	NA	NA	NA	NA	NA	NA	NA	NA	NA	NA	NA
LOC113740402	NA	NA	NA	NA	NA	NA	NA	NA	NA	NA	NA	NA	NA	NA	NA	NA	NA	NA	NA	NA	NA	NA	NA	NA
LOC113702687	NA	NA	NA	NA	NA	NA	NA	NA	NA	NA	NA	NA	NA	NA	NA	NA	NA	NA	NA	NA	NA	NA	NA	NA
LOC113690314	NA	NA	NA	NA	NA	NA	NA	NA	NA	NA	NA	NA	NA	NA	NA	NA	NA	NA	NA	NA	NA	NA	NA	NA
LOC113698822	NA	NA	NA	NA	NA	NA	NA	NA	NA	NA	NA	NA	NA	NA	NA	NA	NA	NA	NA	NA	NA	NA	NA	NA
LOC113716964	NA	NA	NA	NA	NA	NA	NA	NA	NA	NA	NA	NA	NA	NA	NA	NA	NA	NA	NA	NA	NA	NA	NA	NA
LOC113712926	NA	NA	NA	NA	NA	NA	NA	NA	NA	NA	NA	NA	NA	NA	NA	NA	NA	NA	NA	NA	NA	NA	NA	NA
LOC113692799	NA	NA	NA	NA	NA	NA	NA	NA	NA	NA	NA	NA	NA	NA	NA	NA	NA	NA	NA	NA	NA	NA	NA	NA
LOC113731892	NA	NA	NA	NA	NA	NA	NA	NA	NA	NA	NA	NA	NA	NA	NA	NA	NA	NA	NA	NA	NA	NA	NA	NA
LOC113726463	NA	NA	NA	NA	NA	NA	NA	NA	NA	NA	NA	NA	NA	NA	NA	NA	NA	NA	NA	NA	NA	NA	NA	NA
LOC113730742	NA	NA	NA	NA	NA	NA	NA	NA	NA	NA	NA	NA	NA	NA	NA	NA	NA	NA	NA	NA	NA	NA	NA	NA
LOC113734912	NA	NA	NA	NA	NA	NA	NA	NA	NA	NA	NA	NA	NA	NA	NA	NA	NA	NA	NA	NA	NA	NA	NA	NA
LOC113708793	NA	NA	NA	NA	NA	NA	NA	NA	NA	NA	NA	NA	NA	NA	NA	NA	NA	NA	NA	NA	NA	NA	NA	NA
LOC113734184	NA	NA	NA	NA	NA	NA	NA	NA	NA	NA	NA	NA	NA	NA	NA	NA	NA	NA	NA	NA	NA	NA	NA	NA
LOC113708053	NA	NA	NA	NA	NA	NA	NA	NA	NA	NA	NA	NA	NA	NA	NA	NA	NA	NA	NA	NA	NA	NA	NA	NA
LOC113689840	NA	NA	NA	NA	NA	NA	NA	NA	NA	NA	NA	NA	NA	NA	NA	NA	NA	NA	NA	NA	NA	NA	NA	NA
LOC113725706	NA	NA	NA	NA	NA	NA	NA	NA	NA	NA	NA	NA	NA	NA	NA	NA	NA	NA	NA	NA	NA	NA	NA	NA
LOC113701099	NA	NA	NA	NA	NA	NA	NA	NA	NA	NA	NA	NA	NA	NA	NA	NA	NA	NA	NA	NA	NA	NA	NA	NA
LOC113707356	NA	NA	NA	NA	NA	NA	NA	NA	NA	NA	NA	NA	NA	NA	NA	NA	NA	NA	NA	NA	NA	NA	NA	NA
LOC113692678	NA	NA	NA	NA	NA	NA	NA	NA	NA	NA	NA	NA	NA	NA	NA	NA	NA	NA	NA	NA	NA	NA	NA	NA
LOC113698803	NA	NA	NA	NA	NA	NA	NA	NA	NA	NA	NA	NA	NA	NA	NA	NA	NA	NA	NA	NA	NA	NA	NA	NA
LOC113691769	NA	NA	NA	NA	NA	NA	NA	NA	NA	NA	NA	NA	NA	NA	NA	NA	NA	NA	NA	NA	NA	NA	NA	NA
LOC113696971	NA	NA	NA	NA	NA	NA	NA	NA	NA	NA	NA	NA	NA	NA	NA	NA	NA	NA	NA	NA	NA	NA	NA	NA
LOC113742940	NA	NA	NA	NA	NA	NA	NA	NA	NA	NA	NA	NA	NA	NA	NA	NA	NA	NA	NA	NA	NA	NA	NA	NA
LOC113723085	NA	NA	NA	NA	NA	NA	NA	NA	NA	NA	NA	NA	NA	NA	NA	NA	NA	NA	NA	NA	NA	NA	NA	NA
LOC113719331	NA	NA	NA	NA	NA	NA	NA	NA	NA	NA	NA	NA	NA	NA	NA	NA	NA	NA	NA	NA	NA	NA	NA	NA
LOC113726690	NA	NA	NA	NA	NA	NA	NA	NA	NA	NA	NA	NA	NA	NA	NA	NA	NA	NA	NA	NA	NA	NA	NA	NA
LOC113709681	NA	NA	NA	NA	NA	NA	NA	NA	NA	NA	NA	NA	NA	NA	NA	NA	NA	NA	NA	NA	NA	NA	NA	NA
LOC113712356	NA	NA	NA	NA	NA	NA	NA	NA	NA	NA	NA	NA	NA	NA	NA	NA	NA	NA	NA	NA	NA	NA	NA	NA
LOC113718709	NA	NA	NA	NA	NA	NA	NA	NA	NA	NA	NA	NA	NA	NA	NA	NA	NA	NA	NA	NA	NA	NA	NA	NA
LOC113692862	NA	NA	NA	NA	NA	NA	NA	NA	NA	NA	NA	NA	NA	NA	NA	NA	NA	NA	NA	NA	NA	NA	NA	NA
LOC113719221	NA	NA	NA	NA	NA	NA	NA	NA	NA	NA	NA	NA	NA	NA	NA	NA	NA	NA	NA	NA	NA	NA	NA	NA
LOC113688849	NA	NA	NA	NA	NA	NA	NA	NA	NA	NA	NA	NA	NA	NA	NA	NA	NA	NA	NA	NA	NA	NA	NA	NA
LOC113699329	NA	NA	NA	NA	NA	NA	NA	NA	NA	NA	NA	NA	NA	NA	NA	NA	NA	NA	NA	NA	NA	NA	NA	NA
LOC113707205	NA	NA	NA	NA	NA	NA	NA	NA	NA	NA	NA	NA	NA	NA	NA	NA	NA	NA	NA	NA	NA	NA	NA	NA
LOC113712931	NA	NA	NA	NA	NA	NA	NA	NA	NA	NA	NA	NA	NA	NA	NA	NA	NA	NA	NA	NA	NA	NA	NA	NA
LOC113732983	NA	NA	NA	NA	NA	NA	NA	NA	NA	NA	NA	NA	NA	NA	NA	NA	NA	NA	NA	NA	NA	NA	NA	NA
LOC113687968	NA	NA	NA	NA	NA	NA	NA	NA	NA	NA	NA	NA	NA	NA	NA	NA	NA	NA	NA	NA	NA	NA	NA	NA
LOC113695212	NA	NA	NA	NA	NA	NA	NA	NA	NA	NA	NA	NA	NA	NA	NA	NA	NA	NA	NA	NA	NA	NA	NA	NA
LOC113730720	NA	NA	NA	NA	NA	NA	NA	NA	NA	NA	NA	NA	NA	NA	NA	NA	NA	NA	NA	NA	NA	NA	NA	NA
LOC113733087	NA	NA	NA	NA	NA	NA	NA	NA	NA	NA	NA	NA	NA	NA	NA	NA	NA	NA	NA	NA	NA	NA	NA	NA
LOC113717125	NA	NA	NA	NA	NA	NA	NA	NA	NA	NA	NA	NA	NA	NA	NA	NA	NA	NA	NA	NA	NA	NA	NA	NA
LOC113725649	NA	NA	NA	NA	NA	NA	NA	NA	NA	NA	NA	NA	NA	NA	NA	NA	NA	NA	NA	NA	NA	NA	NA	NA
LOC113730948	NA	NA	NA	NA	NA	NA	NA	NA	NA	NA	NA	NA	NA	NA	NA	NA	NA	NA	NA	NA	NA	NA	NA	NA
LOC113694620	NA	NA	NA	NA	NA	NA	NA	NA	NA	NA	NA	NA	NA	NA	NA	NA	NA	NA	NA	NA	NA	NA	NA	NA
LOC113730061	NA	NA	NA	NA	NA	NA	NA	NA	NA	NA	NA	NA	NA	NA	NA	NA	NA	NA	NA	NA	NA	NA	NA	NA
LOC113731179	NA	NA	NA	NA	NA	NA	NA	NA	NA	NA	NA	NA	NA	NA	NA	NA	NA	NA	NA	NA	NA	NA	NA	NA
LOC113710286	NA	NA	NA	NA	NA	NA	NA	NA	NA	NA	NA	NA	NA	NA	NA	NA	NA	NA	NA	NA	NA	NA	NA	NA
LOC113688565	NA	NA	NA	NA	NA	NA	NA	NA	NA	NA	NA	NA	NA	NA	NA	NA	NA	NA	NA	NA	NA	NA	NA	NA
LOC113728087	NA	NA	NA	NA	NA	NA	NA	NA	NA	NA	NA	NA	NA	NA	NA	NA	NA	NA	NA	NA	NA	NA	NA	NA
LOC113726513	NA	NA	NA	NA	NA	NA	NA	NA	NA	NA	NA	NA	NA	NA	NA	NA	NA	NA	NA	NA	NA	NA	NA	NA
LOC113693642	NA	NA	NA	NA	NA	NA	NA	NA	NA	NA	NA	NA	NA	NA	NA	NA	NA	NA	NA	NA	NA	NA	NA	NA
LOC113734874	NA	NA	NA	NA	NA	NA	NA	NA	NA	NA	NA	NA	NA	NA	NA	NA	NA	NA	NA	NA	NA	NA	NA	NA
LOC113728128	NA	NA	NA	NA	NA	NA	NA	NA	NA	NA	NA	NA	NA	NA	NA	NA	NA	NA	NA	NA	NA	NA	NA	NA
LOC113710706	NA	NA	NA	NA	NA	NA	NA	NA	NA	NA	NA	NA	NA	NA	NA	NA	NA	NA	NA	NA	NA	NA	NA	NA
LOC113742751	NA	NA	NA	NA	NA	NA	NA	NA	NA	NA	NA	NA	NA	NA	NA	NA	NA	NA	NA	NA	NA	NA	NA	NA
LOC113730516	NA	NA	NA	NA	NA	NA	NA	NA	NA	NA	NA	NA	NA	NA	NA	NA	NA	NA	NA	NA	NA	NA	NA	NA
LOC113727850	NA	NA	NA	NA	NA	NA	NA	NA	NA	NA	NA	NA	NA	NA	NA	NA	NA	NA	NA	NA	NA	NA	NA	NA
LOC113713025	NA	NA	NA	NA	NA	NA	NA	NA	NA	NA	NA	NA	NA	NA	NA	NA	NA	NA	NA	NA	NA	NA	NA	NA
LOC113708917	NA	NA	NA	NA	NA	NA	NA	NA	NA	NA	NA	NA	NA	NA	NA	NA	NA	NA	NA	NA	NA	NA	NA	NA
LOC113698118	NA	NA	NA	NA	NA	NA	NA	NA	NA	NA	NA	NA	NA	NA	NA	NA	NA	NA	NA	NA	NA	NA	NA	NA
LOC113742544	NA	NA	NA	NA	NA	NA	NA	NA	NA	NA	NA	NA	NA	NA	NA	NA	NA	NA	NA	NA	NA	NA	NA	NA
LOC113739528	NA	NA	NA	NA	NA	NA	NA	NA	NA	NA	NA	NA	NA	NA	NA	NA	NA	NA	NA	NA	NA	NA	NA	NA
LOC113687969	NA	NA	NA	NA	NA	NA	NA	NA	NA	NA	NA	NA	NA	NA	NA	NA	NA	NA	NA	NA	NA	NA	NA	NA
LOC113693836	NA	NA	NA	NA	NA	NA	NA	NA	NA	NA	NA	NA	NA	NA	NA	NA	NA	NA	NA	NA	NA	NA	NA	NA
LOC113712790	NA	NA	NA	NA	NA	NA	NA	NA	NA	NA	NA	NA	NA	NA	NA	NA	NA	NA	NA	NA	NA	NA	NA	NA
LOC113742230	NA	NA	NA	NA	NA	NA	NA	NA	NA	NA	NA	NA	NA	NA	NA	NA	NA	NA	NA	NA	NA	NA	NA	NA
LOC113710194	NA	NA	NA	NA	NA	NA	NA	NA	NA	NA	NA	NA	NA	NA	NA	NA	NA	NA	NA	NA	NA	NA	NA	NA
LOC113739972	NA	NA	NA	NA	NA	NA	NA	NA	NA	NA	NA	NA	NA	NA	NA	NA	NA	NA	NA	NA	NA	NA	NA	NA
LOC113689702	NA	NA	NA	NA	NA	NA	NA	NA	NA	NA	NA	NA	NA	NA	NA	NA	NA	NA	NA	NA	NA	NA	NA	NA
LOC113719545	NA	NA	NA	NA	NA	NA	NA	NA	NA	NA	NA	NA	NA	NA	NA	NA	NA	NA	NA	NA	NA	NA	NA	NA
LOC113726706	NA	NA	NA	NA	NA	NA	NA	NA	NA	NA	NA	NA	NA	NA	NA	NA	NA	NA	NA	NA	NA	NA	NA	NA
LOC113724796	NA	NA	NA	NA	NA	NA	NA	NA	NA	NA	NA	NA	NA	NA	NA	NA	NA	NA	NA	NA	NA	NA	NA	NA
LOC113719264	NA	NA	NA	NA	NA	NA	NA	NA	NA	NA	NA	NA	NA	NA	NA	NA	NA	NA	NA	NA	NA	NA	NA	NA
LOC113743264	NA	NA	NA	NA	NA	NA	NA	NA	NA	NA	NA	NA	NA	NA	NA	NA	NA	NA	NA	NA	NA	NA	NA	NA
LOC113712319	NA	NA	NA	NA	NA	NA	NA	NA	NA	NA	NA	NA	NA	NA	NA	NA	NA	NA	NA	NA	NA	NA	NA	NA
LOC113727919	NA	NA	NA	NA	NA	NA	NA	NA	NA	NA	NA	NA	NA	NA	NA	NA	NA	NA	NA	NA	NA	NA	NA	NA
LOC113692107	NA	NA	NA	NA	NA	NA	NA	NA	NA	NA	NA	NA	NA	NA	NA	NA	NA	NA	NA	NA	NA	NA	NA	NA
LOC113733177	NA	NA	NA	NA	NA	NA	NA	NA	NA	NA	NA	NA	NA	NA	NA	NA	NA	NA	NA	NA	NA	NA	NA	NA
LOC113712805	NA	NA	NA	NA	NA	NA	NA	NA	NA	NA	NA	NA	NA	NA	NA	NA	NA	NA	NA	NA	NA	NA	NA	NA
LOC113731842	NA	NA	NA	NA	NA	NA	NA	NA	NA	NA	NA	NA	NA	NA	NA	NA	NA	NA	NA	NA	NA	NA	NA	NA
LOC113705489	NA	NA	NA	NA	NA	NA	NA	NA	NA	NA	NA	NA	NA	NA	NA	NA	NA	NA	NA	NA	NA	NA	NA	NA
LOC113725716	NA	NA	NA	NA	NA	NA	NA	NA	NA	NA	NA	NA	NA	NA	NA	NA	NA	NA	NA	NA	NA	NA	NA	NA
LOC113735211	NA	NA	NA	NA	NA	NA	NA	NA	NA	NA	NA	NA	NA	NA	NA	NA	NA	NA	NA	NA	NA	NA	NA	NA
[truncated: 60 more rows]
