# Supplementary material for: Transcriptomic Analysis of Alternative Splicing Events during Different Fruit Ripening Stages of Coffea arabica L
Source: Genes (Basel). 2024 Apr 5;15(4):459. doi: 10.3390/genes15040459 (PMC11050144; doi:10.3390/genes15040459)
Supplement: Supplementary file 1 [file genes-15-00459-s001.zip › TableS4.xlsx]

## Sheet: Sheet1
Table S4: List of overlapped genes with five AS types occurring.
Gene ID	Homolog in Arabidopsis	Gene description	Function
LOC113732495	GRF2	protein_coding	general regulatory factor 2
LOC113736605	CTR1	lncRNA	Protein kinase superfamily protein
LOC113707757	ELF7	protein_coding	hydroxyproline-rich glycoprotein family protein
LOC113697369	STT3A	protein_coding	staurosporin and temperature sensitive 3-like A
