# Supplementary material for: Transcriptomic Analysis of Alternative Splicing Events during Different Fruit Ripening Stages of Coffea arabica L
Source: Genes (Basel). 2024 Apr 5;15(4):459. doi: 10.3390/genes15040459 (PMC11050144; doi:10.3390/genes15040459)
Supplement: Supplementary file 1 [file genes-15-00459-s001.zip › TableS5.xlsx]

## Sheet: Sheet1
Table S5: List of genes in the five biological pathways most enriched for AS
Gene ID	Homolog in Arabidopsis	Gene description	Function	KEGG pathway
LOC113699708	At5g02490	lncRNA	hypothetical protein	Spliceosome
LOC113715095	At1g76940	protein_coding	U2 small nuclear ribonucleoprotein B'' 2 isoform X1
LOC113717326	At2g47640	protein_coding	probable small nuclear ribonucleoprotein Sm D2
LOC113719571	At2g47640	protein_coding	small nuclear ribonucleoprotein Sm D2
LOC113743807	At5g61030	protein_coding	RNA-binding (RRM/RBD/RNP motif) family protein
LOC113697510	At5g19960	protein_coding	glycine-rich RNA-binding protein 3, mitochondrial
LOC113734503	At3g23830	protein_coding	glycine-rich RNA-binding protein 4, mitochondrial
LOC113736371	At3g23830	protein_coding	glycine-rich RNA-binding protein 4, mitochondrial
LOC113697443	At3g15010	protein_coding	UBP1-associated protein 2A-like
LOC113731062	At3g15010	protein_coding	UBP1-associated protein 2C
LOC113701847	At3g29390	protein_coding	DEAD-box ATP-dependent RNA helicase 42 isoform X1
LOC113712356	At1g20920	protein_coding	LOW QUALITY PROTEIN: DEAD-box ATP-dependent RNA helicase 42
LOC113714528	At1g20920	protein_coding	LOW QUALITY PROTEIN: DEAD-box ATP-dependent RNA helicase 42
LOC113706571	At5g11200	protein_coding	DEAD-box ATP-dependent RNA helicase 56 isoform X1
LOC113727189	At3g14470	protein_coding	NB-ARC domain disease resistance protein, putative
LOC113732403	At3g14470	protein_coding	NB-ARC domain disease resistance protein, putative
LOC113732412	At3g14470	protein_coding	NB-ARC domain disease resistance protein, putative
LOC113727371	At5g13750	protein_coding	hypothetical protein
LOC113732575	At5g13750	protein_coding	hypothetical protein
LOC113697552	At5g13750	protein_coding	hypothetical protein
LOC113713371	At1g27900	protein_coding	probable pre-mRNA-splicing factor ATP-dependent RNA helicase DEAH4
LOC113717276	At1g60200	protein_coding	RNA-binding protein 25 isoform X1
LOC113739871	At5g63120	protein_coding	DEAD-box ATP-dependent RNA helicase 20
LOC113742559	At5g63120	protein_coding	DEAD-box ATP-dependent RNA helicase 20
LOC113699257	At3g01540	protein_coding	DEAD-box ATP-dependent RNA helicase 46
LOC113705141	At1g50870	protein_coding	uncharacterized protein LOC113271800
LOC113718703	At3g19840	protein_coding	pre-mRNA-processing protein 40C
LOC113691446	At3g11960	protein_coding	pre-mRNA-splicing factor prp12
LOC113694549	At3g11960	protein_coding	pre-mRNA-splicing factor prp12
LOC113729865	At4g10610	protein_coding	hypothetical protein
LOC113699319	At2g18510	protein_coding	splicing factor 3B subunit 4
LOC113700127	At1g60900	protein_coding	splicing factor U2af large subunit B-like
LOC113706721	At5g25060	protein_coding	protein RRC1 isoform X1
LOC113704762	At5g25060	protein_coding	protein RRC1-like isoform X1
LOC113708699	At4g22350	protein_coding	U4/U6.U5 tri-snRNP-associated protein 2-like
LOC113699377	At5g37370	protein_coding	pre-mRNA splicing factor SR-like 1 isoform X1
LOC113717316	At2g47940	protein_coding	uncharacterized protein LOC9311097
LOC113742157	At5g40200	protein_coding	uncharacterized protein LOC9311097
LOC113699281	At3g02710	protein_coding	beta-catenin-like protein 1
LOC113702103	At3g02710	protein_coding	beta-catenin-like protein 1
LOC113716813	At5g63140	protein_coding	hypothetical protein
LOC113732489	At2g38770	protein_coding	intron-binding protein aquarius
LOC113724395	At5g09860	protein_coding	THO complex subunit 1
LOC113690567	At2g13540	protein_coding	nuclear cap-binding protein subunit 1
LOC113732887	At1g09140	protein_coding	serine/arginine-rich splicing factor SR30-like isoform X1
LOC113734944	At1g09140	protein_coding	serine/arginine-rich-splicing factor SR34-like
LOC113718022	At1g09140	protein_coding	serine/arginine-rich-splicing factor SR34-like
LOC113725077	At5g52040	protein_coding	serine/arginine-rich splicing factor RS40 isoform X1
LOC113727996	At5g52040	protein_coding	serine/arginine-rich splicing factor RS41-like isoform X1
LOC113733115	At5g52040	protein_coding	serine/arginine-rich splicing factor RS41-like isoform X1
LOC113730575	At2g37340	protein_coding	serine/arginine-rich splicing factor RS2Z33-like
LOC113694891	At3g53500	protein_coding	serine/arginine-rich splicing factor RS2Z33-like
LOC113730764	At1g60650	protein_coding	serine/arginine-rich splicing factor RSZ21 isoform X1
LOC113706934	At2g24590	protein_coding	serine/arginine-rich splicing factor RSZ22
LOC113729929	At1g07350	protein_coding	serine/arginine-rich splicing factor SR45a-like
LOC113726732	At4g35450	protein_coding	SUPPRESSOR OF ABI3-5-like
LOC113731853	At4g35450	protein_coding	SUPPRESSOR OF ABI3-5-like
LOC113734019	At5g18810	protein_coding	LOW QUALITY PROTEIN: serine/arginine-rich SC35-like splicing factor SCL28
LOC113730476	At3g55460	protein_coding	serine/arginine-rich SC35-like splicing factor SCL30
LOC113725464	At3g55460	protein_coding	serine/arginine-rich SC35-like splicing factor SCL30 isoform X1
LOC113711670	At5g58470	protein_coding	transcription initiation factor TFIID subunit 15b
LOC113731238	At4g39100_1	protein_coding	NR
LOC113688578	At3g12580	protein_coding	heat shock cognate 70 kDa protein-like
LOC113740589	At1g09760	protein_coding	U2 small nuclear ribonucleoprotein A'-like
LOC113726000	At1g32490	protein_coding	putative pre-mRNA-splicing factor ATP-dependent RNA helicase DHX16
LOC113709727	At5g13010	protein_coding	pre-mRNA-splicing factor ATP-dependent RNA helicase DEAH7
LOC113731488	NR	protein_coding	DEAD-box ATP-dependent RNA helicase 20
LOC113715220	At4g39680	protein_coding	SAFB-like transcription modulator isoform X1
LOC113717669	At1g24706	protein_coding	THO complex subunit 2
LOC113701445	At5g37720	protein_coding	THO complex subunit 4D isoform X2
LOC113688027	At2g13540	protein_coding	nuclear cap-binding protein subunit 1
LOC113727685	At1g09140	protein_coding	serine/arginine-rich splicing factor SR30-like isoform X1
LOC113714510	At5g64200	protein_coding	serine/arginine-rich splicing factor SC35
LOC113713822	At3g19760	protein_coding	eukaryotic initiation factor 4A-3
LOC113699230	At5g15730	protein_coding	heat shock cognate 70 kDa protein 2-like
LOC113702262	At5g15730	protein_coding	heat shock cognate 70 kDa protein 2-like
LOC113727311	At2g38730	protein_coding	peptidyl-prolyl cis-trans isomerase CYP22 isoform X1
LOC113738541	At4g30330	protein_coding	small nuclear ribonucleoprotein E-like
LOC113698344	At1g65700	protein_coding	sm-like protein LSM8
LOC113704829	At1g10580	protein_coding	pre-mRNA-processing factor 17
LOC113732579	At5g13750	protein_coding	hypothetical protein
LOC113719088	At1g26370	protein_coding	pre-mRNA-splicing factor ATP-dependent RNA helicase DEAH10
LOC113712353	At1g27900	protein_coding	probable pre-mRNA-splicing factor ATP-dependent RNA helicase DEAH4 isoform X1
LOC113717555	At1g60200	protein_coding	RNA-binding protein 25 isoform X1
LOC113718802	At2g47330	protein_coding	DEAD-box ATP-dependent RNA helicase 24
LOC113717958	At1g69310	protein_coding	DEAD-box ATP-dependent RNA helicase 24 isoform X1
LOC113702157	At5g37370	protein_coding	pre-mRNA splicing factor SR-like 1 isoform X1
LOC113741326	At3g18160_2	protein_coding	pre-mRNA-splicing factor SPF27 homolog
LOC113732553	At5g09860	protein_coding	THO complex subunit 1
LOC113712558	At5g44200	protein_coding	nuclear cap-binding protein subunit 2-like
LOC113729863	At3g49430	protein_coding	serine/arginine-rich splicing factor SR34A-like
LOC113717151	At2g24590	protein_coding	serine/arginine-rich splicing factor RSZ21A-like
LOC113704374	At1g07350	protein_coding	serine/arginine-rich splicing factor SR45a-like
LOC113696979	At3g13570	protein_coding	serine/arginine-rich SC35-like splicing factor SCL33 isoform X1
LOC113701336	At1g65700	protein_coding	sm-like protein LSM8
LOC113727192	At3g14470	protein_coding	NB-ARC domain disease resistance protein, putative
LOC113720368	At3g19840	protein_coding	pre-mRNA-processing protein 40C
LOC113690526	At5g55100	protein_coding	probable splicing factor 3A subunit 1
LOC113715196	At1g08040	protein_coding	splicing factor 3B subunit 4 isoform X1
LOC113711266	At1g07170	protein_coding	PHD finger-like domain-containing protein 5B
LOC113736199	At2g33440	protein_coding	uncharacterized protein LOC105171755
LOC113690813	At1g79510	protein_coding	U2 snRNP-associated SURP motif-containing protein
LOC113740386	At5g08290	protein_coding	thioredoxin-like protein YLS8
LOC113731916	At2g29580	protein_coding	zinc finger CCCH domain-containing protein 49-like
LOC113727249	At2g38770	protein_coding	intron-binding protein aquarius
LOC113708949	At5g59950	protein_coding	THO complex subunit 4A
LOC113731676	At5g64200	protein_coding	serine/arginine-rich splicing factor SC35
LOC113730108	At5g52040	protein_coding	serine/arginine-rich splicing factor RS40 isoform X1
LOC113697460	At5g06370	protein_coding	heat shock cognate 70 kDa protein 2-like
LOC113741607	At2g18740	protein_coding	small nuclear ribonucleoprotein E
LOC113694174	At3g15010	protein_coding	UBP1-associated protein 2A-like
LOC113732449	At3g14470	protein_coding	NB-ARC domain disease resistance protein, putative
LOC113710326	At4g22350	protein_coding	U4/U6.U5 tri-snRNP-associated protein 2-like
LOC113719135	At5g63140	protein_coding	hypothetical protein
LOC113701984	At1g07350	protein_coding	serine/arginine-rich splicing factor SR45a
LOC113705210	At1g07350	protein_coding	serine/arginine-rich splicing factor SR45a-like
LOC113688510	At3g20650	protein_coding	mRNA cap guanine-N7 methyltransferase 1 isoform X1	mRNA surveillance pathway
LOC113725723	At3g52210	protein_coding	mRNA cap guanine-N7 methyltransferase 2 isoform X1
LOC113741577	At1g17720	protein_coding	serine/threonine protein phosphatase 2A 55 kDa regulatory subunit B beta isoform isoform X1
LOC113739891	At1g17720	protein_coding	serine/threonine protein phosphatase 2A 55 kDa regulatory subunit B beta isoform-like isoform X1
LOC113742205	At1g17720	protein_coding	serine/threonine protein phosphatase 2A 55 kDa regulatory subunit B beta isoform-like isoform X1
LOC113698293	At2g42500	protein_coding	serine/threonine-protein phosphatase PP2A catalytic subunit
LOC113726967	At2g42500	protein_coding	serine/threonine-protein phosphatase PP2A-2 catalytic subunit
LOC113712198	At1g27595	protein_coding	symplekin isoform X1
LOC113714671	At1g27595	protein_coding	symplekin isoform X1
LOC113730622	At4g27650	protein_coding	protein PELOTA 1
LOC113725569	At5g28850	protein_coding	serine/threonine protein phosphatase 2A regulatory subunit B''beta
LOC113730592	At5g28850	protein_coding	serine/threonine protein phosphatase 2A regulatory subunit B''beta
LOC113688255	At5g56170	protein_coding	serine/threonine protein phosphatase 2A 57 kDa regulatory subunit B' beta isoform-like
LOC113706571	At5g11200	protein_coding	DEAD-box ATP-dependent RNA helicase 56 isoform X1
LOC113690567	At2g13540	protein_coding	nuclear cap-binding protein subunit 1
LOC113711670	At5g58470	protein_coding	transcription initiation factor TFIID subunit 15b
LOC113694536	At4g34110	protein_coding	polyadenylate-binding protein 7-like
LOC113726452	At1g49760	protein_coding	polyadenylate-binding protein 8-like
LOC113731445	At1g49760	protein_coding	polyadenylate-binding protein 8-like
LOC113710195	At2g29210	protein_coding	serine/arginine repetitive matrix protein 1-like isoform X1
LOC113741300	At4g32850	protein_coding	nuclear poly(A) polymerase 4-like isoform X1
LOC113726628	At5g10350	protein_coding	polyadenylate-binding protein 2-like
LOC113697574	At4g29820	protein_coding	pre-mRNA cleavage factor Im 25 kDa subunit 1
LOC113715222	At1g22180	protein_coding	Clp1-domain-containing protein
LOC113719347	At1g14820	protein_coding	Clp1-domain-containing protein
LOC113706828	At3g04680	protein_coding	protein CLP1 homolog
LOC113694010	At2g25010	protein_coding	LOW QUALITY PROTEIN: uncharacterized protein LOC111982967
LOC113725016	At5g23880	protein_coding	cleavage and polyadenylation specificity factor subunit 2
LOC113727391	At5g18440	protein_coding	uncharacterized protein LOC110657013
LOC113708668	At1g71800	protein_coding	cleavage stimulating factor 64
LOC113710490	At1g71800	protein_coding	cleavage stimulating factor 64
LOC113726391	At1g17760	protein_coding	cleavage stimulation factor subunit 77
LOC113730988	At1g28260	protein_coding	protein SMG7-like
LOC113708605	At3g07810	protein_coding	heterogeneous nuclear ribonucleoprotein 1
LOC113690795	At3g15390	protein_coding	heterogeneous nuclear ribonucleoprotein D0-like
LOC113732539	At5g13480	protein_coding	flowering time control protein FY isoform X1
LOC113716979	At1g13120	protein_coding	protein GLE1 isoform X1
LOC113691623	At5g01400	protein_coding	symplekin isoform X1
LOC113697522	At5g01400	protein_coding	symplekin isoform X1
LOC113730435	At2g39840	protein_coding	serine/threonine-protein phosphatase PP1 isozyme 3
LOC113715220	At4g39680	protein_coding	SAFB-like transcription modulator isoform X1
LOC113701445	At5g37720	protein_coding	THO complex subunit 4D isoform X2
LOC113688027	At2g13540	protein_coding	nuclear cap-binding protein subunit 1
LOC113713822	At3g19760	protein_coding	eukaryotic initiation factor 4A-3
LOC113734937	At2g43410	protein_coding	30S ribosomal protein 2, chloroplastic
LOC113731446	At1g49760	protein_coding	polyadenylate-binding protein 2-like isoform X1
LOC113690460	At1g16610	protein_coding	serine/arginine-rich splicing factor SR45 isoform X2
LOC113708686	At2g39260	protein_coding	regulator of nonsense transcripts UPF2
LOC113713303	At1g75170	protein_coding	Clp1-domain-containing protein
LOC113692745	At2g36480	protein_coding	polyadenylation and cleavage factor homolog 4-like
LOC113725116	At5g51660	protein_coding	cleavage and polyadenylation specificity factor subunit 1 isoform X1
LOC113740158	At5g60940	protein_coding	cleavage stimulation factor subunit 50 isoform X1
LOC113731373	At1g17760	protein_coding	cleavage stimulation factor subunit 77
LOC113740120	At5g10630_2	protein_coding	HBS1-like protein isoform X1
LOC113719282	At1g13120	protein_coding	protein GLE1 isoform X1
LOC113738365	At1g18070	protein_coding	eukaryotic peptide chain release factor GTP-binding subunit ERF3A isoform X1
LOC113701685	At2g42500	protein_coding	serine/threonine-protein phosphatase PP2A catalytic subunit
LOC113712558	At5g44200	protein_coding	nuclear cap-binding protein subunit 2-like
LOC113740112	At1g17980	protein_coding	nuclear poly(A) polymerase 1
LOC113693993	At4g29820	protein_coding	pre-mRNA cleavage factor Im 25 kDa subunit 1
LOC113738128	At5g18580	protein_coding	probable serine/threonine-protein phosphatase 2A regulatory subunit B'' subunit TON2
LOC113708949	At5g59950	protein_coding	THO complex subunit 4A
LOC113728848	At3g52150	protein_coding	30S ribosomal protein 2, chloroplastic
LOC113727970	At2g45640	protein_coding	histone deacetylase complex subunit SAP18-like
LOC113710303	At2g39260	protein_coding	regulator of nonsense transcripts UPF2
LOC113731932	At1g33980	protein_coding	regulator of nonsense transcripts UPF3-like
LOC113715506	At1g14820	protein_coding	Clp1-domain-containing protein
LOC113730055	At5g23880	protein_coding	cleavage and polyadenylation specificity factor subunit 2
LOC113734322	At4g14300	protein_coding	heterogeneous nuclear ribonucleoprotein 1-like
LOC113697991	At5g66240	protein_coding	protein ANTHESIS POMOTING FACTOR 1 isoform X2
LOC113742059	At1g18070	protein_coding	eukaryotic peptide chain release factor GTP-binding subunit ERF3A-like
LOC113736729	At2g43410	protein_coding	30S ribosomal protein 2, chloroplastic
LOC113725045	At4g25550	protein_coding	pre-mRNA cleavage factor Im 25 kDa subunit 2
LOC113718987	At1g13190	protein_coding	cleavage and polyadenylation specificity factor subunit 6-like
LOC113695906	At2g36480	protein_coding	polyadenylation and cleavage factor homolog 4-like
LOC113724355	At5g13480	protein_coding	flowering time control protein FY isoform X1
LOC113725205	At5g61580	protein_coding	ATP-dependent 6-phosphofructokinase 4, chloroplastic	RNA degradation
LOC113703566	At5g56630	protein_coding	ATP-dependent 6-phosphofructokinase 6-like
LOC113692275	At3g03710	protein_coding	probable polyribonucleotide nucleotidyltransferase 1, chloroplastic
LOC113688180	At1g55870	protein_coding	poly(A)-specific ribonuclease PARN
LOC113735089	At4g13070	protein_coding	uncharacterized CRM domain-containing protein At3g25440, chloroplastic
LOC113702215	At5g16180	protein_coding	uncharacterized CRM domain-containing protein At3g25440, chloroplastic isoform X1
LOC113729833	At2g29560	protein_coding	cytosolic enolase 3
LOC113731760	At4g00060	protein_coding	non-canonical poly(A) RNA polymerase PAPD5
LOC113740057	At3g60500	protein_coding	exosome complex component RRP45A-like
LOC113742562	At1g03360	protein_coding	exosome complex component RRP4 homolog
LOC113738529	At2g25350_2	protein_coding	putative exosome complex component rrp40
LOC113717970	At1g30110	protein_coding	hypothetical protein
LOC113707759	At3g45630_1	protein_coding	uncharacterized LOC107762420
LOC113708608	At3g45630_1	protein_coding	uncharacterized protein LOC111371353 isoform X1
LOC113728164	At3g61620	protein_coding	exosome complex component RRP41 homolog
LOC113733272	At3g61620	protein_coding	exosome complex component RRP41 homolog
LOC113693505	At5g18230	protein_coding	CCR4-NOT transcription complex subunit 3
LOC113695342	At5g18230	protein_coding	CCR4-NOT transcription complex subunit 3
LOC113691741	At5g35910	protein_coding	protein RRP6-like 2
LOC113695841	At2g06990	protein_coding	DExH-box ATP-dependent RNA helicase DExH10
LOC113716908	At1g70070	protein_coding	probable viral mRNA translation inhibitor SKI2
LOC113692741	At3g58580	protein_coding	carbon catabolite repressor protein 4 homolog 1-like
LOC113695944	At3g58580	protein_coding	carbon catabolite repressor protein 4 homolog 1-like
LOC113712068	At3g58580	protein_coding	carbon catabolite repressor protein 4 homolog 1-like
LOC113704297	At1g31500	protein_coding	carbon catabolite repressor protein 4 homolog 4 isoform X2
LOC113704032	At5g11350	protein_coding	hypothetical protein
LOC113706980	At5g11350	protein_coding	hypothetical protein
LOC113709426	At5g59710	protein_coding	probable NOT transcription complex subunit VIP2
LOC113707356	At5g59710	protein_coding	probable NOT transcription complex subunit VIP2 isoform X1
LOC113696089	At5g35440	protein_coding	CCR4-NOT transcription complex subunit 10
LOC113707106	At4g00660	protein_coding	DEAD-box ATP-dependent RNA helicase 8
LOC113711625	At5g43820	protein_coding	enhancer of mRNA-decapping protein 4 isoform X1
LOC113694536	At4g34110	protein_coding	polyadenylate-binding protein 7-like
LOC113726452	At1g49760	protein_coding	polyadenylate-binding protein 8-like
LOC113731445	At1g49760	protein_coding	polyadenylate-binding protein 8-like
LOC113742305	At1g48650	protein_coding	DExH-box ATP-dependent RNA helicase DExH3 isoform X2
LOC113690770	At2g30800	protein_coding	DExH-box ATP-dependent RNA helicase DExH6 isoform X1
LOC113701615	At5g66290	protein_coding	hypothetical protein
LOC113690726	At5g53770	protein_coding	non-canonical poly(A) RNA polymerase PAPD5
LOC113742295	At1g03360	protein_coding	exosome complex component RRP4 homolog
LOC113742708	At3g18500	protein_coding	hypothetical protein
LOC113704048	At4g00660	protein_coding	DEAD-box ATP-dependent RNA helicase 8
LOC113688483	At3g22270	protein_coding	protein PAT1 homolog 1
LOC113734937	At2g43410	protein_coding	30S ribosomal protein 2, chloroplastic
LOC113731446	At1g49760	protein_coding	polyadenylate-binding protein 2-like isoform X1
LOC113701232	At2g22480	protein_coding	ATP-dependent 6-phosphofructokinase 5, chloroplastic
LOC113705324	At3g25430	protein_coding	poly(A)-specific ribonuclease PARN-like
LOC113736919	At4g13070	protein_coding	uncharacterized CRM domain-containing protein At3g25440, chloroplastic
LOC113734994	At2g28480	protein_coding	uncharacterized CRM domain-containing protein At3g25440, chloroplastic-like
LOC113710454	At2g29560	protein_coding	cytosolic enolase 3
LOC113710523	At3g45630_1	protein_coding	uncharacterized protein LOC104220687 isoform X1
LOC113704262	At5g18250	protein_coding	CCR4-NOT transcription complex subunit 3-like isoform X1
LOC113707141	At5g18250	protein_coding	CCR4-NOT transcription complex subunit 3-like isoform X1
LOC113694842	At1g60080	protein_coding	exosome complex component RRP43
LOC113697905	At1g60080	protein_coding	exosome complex component RRP43
LOC113705425	At3g46210	protein_coding	exosome complex exonuclease RRP46 homolog
LOC113706847	At5g25080	protein_coding	nuclear nucleic acid-binding protein C1D
LOC113731953	At1g59760	protein_coding	DExH-box ATP-dependent RNA helicase DExH9 isoform X1
LOC113700190	At2g34860	protein_coding	hypothetical protein
LOC113705619	At1g08370	protein_coding	mRNA-decapping enzyme-like protein
LOC113728047	At4g00660	protein_coding	DEAD-box ATP-dependent RNA helicase 8
LOC113713633	At5g43820	protein_coding	enhancer of mRNA-decapping protein 4 isoform X1
LOC113705374	At1g75660	protein_coding	5'-3' exoribonuclease 3
LOC113701336	At1g65700	protein_coding	sm-like protein LSM8
LOC113728848	At3g52150	protein_coding	30S ribosomal protein 2, chloroplastic
LOC113731616	At4g33630	protein_coding	RNB-domain-containing protein
LOC113742312	At1g27510	protein_coding	RNB-domain-containing protein
LOC113732420	At3g07750	protein_coding	exosome complex component RRP42
LOC113729888	At3g46960	protein_coding	DExH-box ATP-dependent RNA helicase DExH11
LOC113713829	At3g58560	protein_coding	carbon catabolite repressor protein 4 homolog 1-like
LOC113728523	At5g13570	protein_coding	mRNA-decapping enzyme subunit 2-like
LOC113711717	At5g43820	protein_coding	enhancer of mRNA-decapping protein 4 isoform X1
LOC113691008	At3g13300	protein_coding	enhancer of mRNA-decapping protein 4-like
LOC113698344	At1g65700	protein_coding	sm-like protein LSM8
LOC113736729	At2g43410	protein_coding	30S ribosomal protein 2, chloroplastic
LOC113738081	At3g15020	protein_coding	mMDH; malate dehydrogenase, mitochondrial-like	Carbon metabolism
LOC113728025	At4g00570	protein_coding	NAD-dependent malic enzyme 59 kDa isoform, mitochondrial
LOC113733138	At4g00570	protein_coding	NAD-dependent malic enzyme 59 kDa isoform, mitochondrial
LOC113726917	At2g13560	protein_coding	NAD-dependent malic enzyme 62 kDa isoform, mitochondrial
LOC113732057	At2g13560	protein_coding	NAD-dependent malic enzyme 62 kDa isoform, mitochondrial
LOC113691422	At5g11670	protein_coding	NADP-dependent malic enzyme
LOC113742387	At1g79750	protein_coding	NADP-dependent malic enzyme, chloroplastic
LOC113701673	At1g65930	protein_coding	isocitrate dehydrogenase [NADP] isoform X1
LOC113699185	At5g14590	protein_coding	isocitrate dehydrogenase [NADP]-like
LOC113727840	At1g09420	protein_coding	glucose-6-phosphate 1-dehydrogenase 4, chloroplastic
LOC113719674	At5g13110	protein_coding	glucose-6-phosphate 1-dehydrogenase, chloroplastic
LOC113722933	At5g40760	protein_coding	glucose-6-phosphate 1-dehydrogenase, cytoplasmic isoform
LOC113730753	At5g58330	protein_coding	malate dehydrogenase [NADP], chloroplastic
LOC113708507	At5g14780	protein_coding	formate dehydrogenase, mitochondrial
LOC113698758	At5g14780	protein_coding	formate dehydrogenase, mitochondrial-like
LOC113698591	At2g14170	protein_coding	uncharacterized LOC100254417
LOC113703135	At2g35690	protein_coding	peroxisomal acyl-coenzyme A oxidase 1
LOC113699057	At5g40650	protein_coding	succinate dehydrogenase [ubiquinone] iron-sulfur subunit 2, mitochondrial
LOC113690072	At5g18170	lncRNA	glutamate dehydrogenase 1
LOC113695282	At5g18170	protein_coding	glutamate dehydrogenase 1
LOC113706674	At4g33010	protein_coding	glycine dehydrogenase (decarboxylating), mitochondrial isoform X1
LOC113692736	At4g32520	protein_coding	serine hydroxymethyltransferase 3, chloroplastic
LOC113696084	At4g32520	protein_coding	serine hydroxymethyltransferase 3, chloroplastic
LOC113731866	At1g60990	protein_coding	aminomethyltransferase, mitochondrial-like
LOC113716712	At5g13410	protein_coding	uncharacterized protein LOC110922417
LOC113690449	At5g48230	protein_coding	acetyl-CoA acetyltransferase, cytosolic 1
LOC113691857	At2g19860	protein_coding	hexokinase-1-like isoform X1
LOC113725205	At5g61580	protein_coding	ATP-dependent 6-phosphofructokinase 4, chloroplastic
LOC113703566	At5g56630	protein_coding	ATP-dependent 6-phosphofructokinase 6-like
LOC113688068	At2g16790	protein_coding	probable gluconokinase
LOC113724937	At5g52920	protein_coding	plastidial pyruvate kinase 2
LOC113705051	At1g32440	protein_coding	pyruvate kinase isozyme G, chloroplastic
LOC113696193	At1g56190	protein_coding	phosphoglycerate kinase-like
LOC113702107	At5g24400	protein_coding	probable 6-phosphogluconolactonase 4, chloroplastic isoform X2
LOC113710385	At1g18640	protein_coding	phosphoserine phosphatase, chloroplastic
LOC113716478	At1g68750	protein_coding	phosphoenolpyruvate carboxylase 4-like
LOC113730295	At3g56140	protein_coding	phosphoenolpyruvate carboxylase-like
LOC113698165	At1g67090	protein_coding	ribulose bisphosphate carboxylase small chain, chloroplastic-like
LOC113714675	At4g37870	protein_coding	phosphoenolpyruvate carboxykinase (ATP)-like
LOC113718345	At2g47510	protein_coding	fumarate hydratase 1, mitochondrial
LOC113729833	At2g29560	protein_coding	cytosolic enolase 3
LOC113736909	At2g43750	protein_coding	cysteine synthase, chloroplastic/chromoplastic-like
LOC113736640	At3g01850	protein_coding	ribulose-phosphate 3-epimerase, cytoplasmic isoform-like isoform X1
LOC113725461	At3g55470	protein_coding	triosephosphate isomerase, cytosolic
LOC113716965	At1g25370_1	protein_coding	glucose-6-phosphate isomerase, cytosolic B-like
LOC113719296	At1g25370_1	protein_coding	glucose-6-phosphate isomerase, cytosolic B-like
LOC113698326	At1g22170	protein_coding	2,3-bisphosphoglycerate-dependent phosphoglycerate mutase-like
LOC113701277	At1g22170	protein_coding	2,3-bisphosphoglycerate-dependent phosphoglycerate mutase-like
LOC113711659	At1g22170	protein_coding	uncharacterized protein LOC111391082 isoform X1
LOC113699686	At1g55320	protein_coding	ACS2; acetyl CoA synthetase
LOC113700141	At5g08300	lncRNA	succinyl-CoA ligase [ADP-forming] subunit alpha-2, mitochondrial-like
LOC113738056	At3g16910	protein_coding	acetate/butyrate--CoA ligase AAE7, peroxisomal
LOC113716787	At5g35360	protein_coding	biotin carboxylase 1, chloroplastic
LOC113741483	At3g15690	protein_coding	NR
LOC113712454	At1g36070	protein_coding	Fructose-1,6-bisphosphatase, chloroplastic
LOC113714462	At1g36070	protein_coding	Fructose-1,6-bisphosphatase, chloroplastic
LOC113719543	At1g12900	protein_coding	glyceraldehyde-3-phosphate dehydrogenase A, chloroplastic-like
LOC113695835	At4g13360	protein_coding	3-hydroxyisobutyryl-CoA hydrolase-like protein 3, mitochondrial
LOC113742288	At3g14130	protein_coding	peroxisomal (S)-2-hydroxy-acid oxidase GLO4-like
LOC113709281	At3g14420	protein_coding	peroxisomal (S)-2-hydroxy-acid oxidase-like isoform X1
LOC113742584	At1g80380	protein_coding	D-glycerate 3-kinase, chloroplastic
LOC113725432	At2g39740	protein_coding	hypothetical protein
LOC113727963	At2g45620	protein_coding	hypothetical protein
LOC113730450	At2g39740	protein_coding	hypothetical protein
LOC113702383	At3g45750	protein_coding	hypothetical protein
LOC113742729	At1g17650	protein_coding	glyoxylate/succinic semialdehyde reductase 2, chloroplastic
LOC113710450	At4g20930	protein_coding	probable 3-hydroxyisobutyrate dehydrogenase, mitochondrial isoform X1
LOC113698663	At2g22780	lncRNA	malate dehydrogenase, glyoxysomal-like
LOC113742351	At5g50850	protein_coding	pyruvate dehydrogenase E1 component subunit beta-1, mitochondrial
LOC113691065	At2g34590	protein_coding	pyruvate dehydrogenase E1 component subunit beta-3, chloroplastic-like
LOC113693700	At3g51840	protein_coding	acyl-coenzyme A oxidase 4, peroxisomal
LOC113691846	At5g18170	protein_coding	glutamate dehydrogenase B
LOC113733891	At3g16950	protein_coding	dihydrolipoyl dehydrogenase 2, chloroplastic
LOC113699077	At4g37930	protein_coding	serine hydroxymethyltransferase, mitochondrial-like
LOC113708074	At5g47720	protein_coding	acetyl-CoA acetyltransferase, cytosolic 1
LOC113725725	At3g52200	protein_coding	dihydrolipoyllysine-residue acetyltransferase component 1 of pyruvate dehydrogenase complex, mitochondrial isoform X1
LOC113702443	At2g17640	protein_coding	serine acetyltransferase 2 isoform X1
LOC113687991	At4g26910	protein_coding	dihydrolipoyllysine-residue succinyltransferase component of 2-oxoglutarate dehydrogenase complex 1, mitochondrial-like isoform X1
LOC113739549	At1g72330	protein_coding	alanine aminotransferase 2
LOC113691079	At2g16790	protein_coding	probable gluconokinase
LOC113727313	At2g36970	protein_coding	uncharacterized LOC109182250
LOC113732547	At2g36970	protein_coding	uncharacterized LOC109182250
LOC113693724	At2g41530	protein_coding	S-formylglutathione hydrolase
LOC113735349	At2g47510	protein_coding	fumarate hydratase 1, mitochondrial
LOC113710454	At2g29560	protein_coding	cytosolic enolase 3
LOC113718793	At1g55880	lncRNA	cysteine synthase 2
LOC113735081	At2g43750	protein_coding	cysteine synthase, chloroplastic/chromoplastic
LOC113727486	At5g28030	protein_coding	cysteine synthase-like isoform X1
LOC113697101	At3g10050	protein_coding	threonine dehydratase biosynthetic, chloroplastic
LOC113739912	At5g23050	protein_coding	acetyl-coenzyme A synthetase, chloroplastic/glyoxysomal-like
LOC113694778	At2g38040	protein_coding	acetyl-coenzyme A carboxylase carboxyl transferase subunit alpha, chloroplastic
LOC113725078	At5g52030	protein_coding	catalase-domain-containing protein
LOC113731759	At3g60510	protein_coding	3-hydroxyisobutyryl-CoA hydrolase-like protein 1, mitochondrial
LOC113692396	At4g13360	protein_coding	3-hydroxyisobutyryl-CoA hydrolase-like protein 3, mitochondrial isoform X1
LOC113690721	At3g14415	protein_coding	peroxisomal (S)-2-hydroxy-acid oxidase GLO1
LOC113710402	At1g68010	protein_coding	glycerate dehydrogenase
LOC113733080	At2g45620	protein_coding	hypothetical protein
LOC113697827	At3g45750	protein_coding	hypothetical protein
LOC113742635	At5g63620	protein_coding	alcohol dehydrogenase
LOC113715151	At1g22430	protein_coding	alcohol dehydrogenase-like 1 isoform X3
LOC113712761	At5g42250	protein_coding	alcohol dehydrogenase-like 7
LOC113726574	At2g14170	protein_coding	methylmalonate-semialdehyde dehydrogenase [acylating], mitochondrial
LOC113688560	At3g14750	protein_coding	uncharacterized LOC105784008
LOC113714685	At4g37930	protein_coding	serine hydroxymethyltransferase, mitochondrial-like
LOC113700115	At2g17640	protein_coding	serine acetyltransferase 2 isoform X1
LOC113690524	At4g26910	protein_coding	dihydrolipoyllysine-residue succinyltransferase component of 2-oxoglutarate dehydrogenase complex 1, mitochondrial-like isoform X1
LOC113701232	At2g22480	protein_coding	ATP-dependent 6-phosphofructokinase 5, chloroplastic
LOC113719654	At1g13700	protein_coding	probable 6-phosphogluconolactonase 1
LOC113729882	At5g24400	protein_coding	probable 6-phosphogluconolactonase 4, chloroplastic isoform X2
LOC113688543	At3g14940	protein_coding	phosphoenolpyruvate carboxylase isoform X1
LOC113712864	At4g37870	protein_coding	phosphoenolpyruvate carboxykinase (ATP)-like
LOC113723515	NR	protein_coding	uncharacterized protein LOC106439784
LOC113734858	At3g01850	protein_coding	ribulose-phosphate 3-epimerase, cytoplasmic isoform-like isoform X1
LOC113699651	At1g55320	protein_coding	ACS2; acetyl CoA synthetase
LOC113701670	At5g08300	lncRNA	succinyl-CoA ligase [ADP-forming] subunit alpha-2, mitochondrial-like
LOC113714763	At2g20420	protein_coding	succinate--CoA ligase [ADP-forming] subunit beta, mitochondrial
LOC113691095	At1g06550	protein_coding	3-hydroxyisobutyryl-CoA hydrolase-like protein 5
LOC113718982	At1g70580	protein_coding	glutamate--glyoxylate aminotransferase 2
LOC113708818	At1g68010	protein_coding	glycerate dehydrogenase
LOC113714627	At1g72190	protein_coding	D-3-phosphoglycerate dehydrogenase
LOC113710997	At4g22110	protein_coding	alcohol dehydrogenase-like 1 isoform X3
LOC113699054	At5g65110	protein_coding	acyl-coenzyme A oxidase 2, peroxisomal
LOC113701563	At5g65110	protein_coding	acyl-coenzyme A oxidase 2, peroxisomal
LOC113703629	At2g26080	protein_coding	glycine dehydrogenase (decarboxylating), mitochondrial isoform X1
LOC113712065	At4g37930	protein_coding	serine hydroxymethyltransferase, mitochondrial-like
LOC113726749	At1g60990	protein_coding	aminomethyltransferase, mitochondrial-like
LOC113742652	At1g72330	protein_coding	alanine aminotransferase 2
LOC113734193	At3g22960	protein_coding	pyruvate kinase isozyme A, chloroplastic
LOC113704182	At1g32380	protein_coding	ribose-phosphate pyrophosphokinase 1-like
LOC113699214	At5g24400	protein_coding	probable 6-phosphogluconolactonase 4, chloroplastic isoform X2
LOC113701240	At1g67090	protein_coding	ribulose bisphosphate carboxylase small chain, chloroplastic-like
LOC113687824	At2g05710	protein_coding	aconitate hydratase, cytoplasmic-like
LOC113688111	At2g05710	protein_coding	putative aconitate hydratase, cytoplasmic
LOC113742776	At5g61410	protein_coding	ribulose-phosphate 3-epimerase, chloroplastic
LOC113732097	At5g65940	protein_coding	3-hydroxyisobutyryl-CoA hydrolase 1
LOC113708910	At4g20930	protein_coding	probable 3-hydroxyisobutyrate dehydrogenase, mitochondrial isoform X1
LOC113699424	At1g20570_1	protein_coding	dolichol-phosphate mannosyltransferase subunit 1	N-Glycan biosynthesis
LOC113708696	At4g38240	protein_coding	alpha-1,3-mannosyl-glycoprotein 2-beta-N-acetylglucosaminyltransferase-like
LOC113710497	At4g38240	protein_coding	alpha-1,3-mannosyl-glycoprotein 2-beta-N-acetylglucosaminyltransferase-like
LOC113736647	At3g59390	protein_coding	glycosyltransferase family 13 protein
LOC113725066	At1g12750	protein_coding	dolichyl-phosphate beta-glucosyltransferase
LOC113697289	At3g53780	protein_coding	dolichyl-phosphate beta-glucosyltransferase
LOC113707160	At1g63120	protein_coding	dolichyl-phosphate beta-glucosyltransferase
LOC113694245	At2g13290	protein_coding	beta-1,4-mannosyl-glycoprotein 4-beta-N-acetylglucosaminyltransferase
LOC113694554	At3g57220	protein_coding	UDP-N-acetylglucosamine--dolichyl-phosphate N-acetylglucosaminephosphotransferase-like
LOC113697577	At3g57220	protein_coding	UDP-N-acetylglucosamine--dolichyl-phosphate N-acetylglucosaminephosphotransferase-like
LOC113715732	At1g67490	protein_coding	mannosyl-oligosaccharide glucosidase GCS1
LOC113718705	At3g13020	protein_coding	mannosyl-oligosaccharide 1,2-alpha-mannosidase MNS1
LOC113725442	At3g22220	protein_coding	mannosyl-oligosaccharide 1,2-alpha-mannosidase MNS1
LOC113729968	At1g79740	protein_coding	mannosyl-oligosaccharide 1,2-alpha-mannosidase MNS1
LOC113690724	At1g16570	protein_coding	UDP-glycosyltransferase TURAN
LOC113688550	At1g78800	protein_coding	alpha-1,3/1,6-mannosyltransferase ALG2
LOC113725659	At5g04740	protein_coding	alpha-1,2-mannosyltransferase
LOC113742866	At1g16880	protein_coding	alpha-1,2-mannosyltransferase
LOC113732017	NR	protein_coding	dol-P-Man:Man(7)GlcNAc(2)-PP-Dol alpha-1,6-mannosyltransferase
LOC113700440	At5g38460	protein_coding	probable dolichyl pyrophosphate Man9GlcNAc2 alpha-1,3-glucosyltransferase
LOC113732044	At2g44660	protein_coding	probable dolichyl pyrophosphate Glc1Man9GlcNAc2 alpha-1,3-glucosyltransferase
LOC113704377	At3g23640	protein_coding	Glycoside hydrolase, superfamily
LOC113727590	At4g16710	protein_coding	UDP-N-acetylglucosamine transferase subunit ALG13 homolog
LOC113732796	At4g16710	protein_coding	UDP-N-acetylglucosamine transferase subunit ALG13 homolog
LOC113691658	At4g18230	protein_coding	UDP-N-acetylglucosamine transferase subunit ALG14 homolog
LOC113694229	At4g18230	protein_coding	UDP-N-acetylglucosamine transferase subunit ALG14 homolog
LOC113731202	At2g16530	protein_coding	polyprenol reductase 2
LOC113725806	At2g01720	protein_coding	dolichyl-diphosphooligosaccharide--protein glycosyltransferase subunit 1B
LOC113690348	At5g14240	protein_coding	dolichyl-diphosphooligosaccharide--protein glycosyltransferase subunit 2
LOC113706400	At1g32210	protein_coding	DAD1; dolichyl-diphosphooligosaccharide--protein glycosyltransferase subunit DAD1
LOC113731322	At5g66680	protein_coding	dolichyl-diphosphooligosaccharide--protein glycosyltransferase 48 kDa subunit-like
LOC113702229	At1g20570_1	protein_coding	dolichol-phosphate mannosyltransferase subunit 1
LOC113734865	At3g59390	protein_coding	glycosyltransferase family 13 protein
LOC113694526	At2g13290	protein_coding	beta-1,4-mannosyl-glycoprotein 4-beta-N-acetylglucosaminyltransferase
LOC113698780	At5g14950	protein_coding	alpha-mannosidase 2
LOC113697369	At5g19690	protein_coding	dolichyl-diphosphooligosaccharide--protein glycosyltransferase subunit STT3A isoform X1
LOC113698811	At5g66450	protein_coding	lipid phosphate phosphatase epsilon 2, chloroplastic isoform X1
LOC113716311	At4g21150	protein_coding	dolichyl-diphosphooligosaccharide--protein glycosyltransferase subunit 2
LOC113706846	NR	protein_coding	GDP-Man:Man(3)GlcNAc(2)-PP-Dol alpha-1,2-mannosyltransferase-like isoform X1
LOC113688330	At1g16900_2	protein_coding	dol-P-Man:Man(6)GlcNAc(2)-PP-Dol alpha-1,2-mannosyltransferase
LOC113726888	NR	protein_coding	dol-P-Man:Man(7)GlcNAc(2)-PP-Dol alpha-1,6-mannosyltransferase
LOC113724925	At1g79740	protein_coding	mannosyl-oligosaccharide 1,2-alpha-mannosidase MNS1
LOC113737995	At3g17450	protein_coding	mannosyl-oligosaccharide 1,2-alpha-mannosidase MNS1
LOC113713412	At1g48140	protein_coding	dolichol-phosphate mannose synthase subunit 3
LOC113690768	At1g16900_2	protein_coding	dol-P-Man:Man(6)GlcNAc(2)-PP-Dol alpha-1,2-mannosyltransferase
LOC113695876	At5g19690	protein_coding	LTM1; dolichyl-diphosphooligosaccharide--protein glycosyltransferase subunit STT3A
