# Supplementary material for: Transcriptomic Analysis of Alternative Splicing Events during Different Fruit Ripening Stages of Coffea arabica L
Source: Genes (Basel). 2024 Apr 5;15(4):459. doi: 10.3390/genes15040459 (PMC11050144; doi:10.3390/genes15040459)
Supplement: Supplementary file 1 [file genes-15-00459-s001.zip › TableS6.xlsx]

## Sheet: Sheet1
Table S6: List of genes that are both differentially spliced and differentially expressed in the spliceosome and carbon metabolic pathways.
GeneID	KEGG	GO	K number	Homolog in Arabidopsis	Function
LOC113688578	ko03040: Spliceosome; ko04141: Protein processing in endoplasmic reticulum; ko04144: Endocytosis	GO:0005524,ATP binding; GO:0016887,ATPase activity; GO:0000166,nucleotide binding; GO:0003674,molecular_function; GO:0005488,binding; GO:0008144,drug binding; GO:0017076,purine nucleotide binding; GO:0030554,adenyl nucleotide binding; GO:0032553,ribonucleotide binding; GO:0032555,purine ribonucleotide binding; GO:0032559,adenyl ribonucleotide binding; GO:0035639,purine ribonucleoside triphosphate…	K03283	At3g12580	heat shock cognate 70 kDa protein-like
LOC113696979	ko03040: Spliceosome	GO:0005737,cytoplasm; GO:0005829,cytosol; GO:0016607,nuclear speck; GO:0005681,spliceosomal complex; GO:0003729,mRNA binding; GO:0003723,RNA binding; GO:0000398,mRNA splicing, via spliceosome; GO:0008380,RNA splicing; GO:0003674,molecular_function; GO:0003676,nucleic acid binding; GO:0005488,binding; GO:0097159,organic cyclic compound binding; GO:1901363,heterocyclic compound binding; GO:0000375,…	K12900	At3g13570	serine/arginine-rich SC35-like splicing factor SCL33 isoform X1
LOC113701445	ko03013: RNA transport; ko03015: mRNA surveillance pathway; ko03040: Spliceosome	GO:0005730,nucleolus; GO:0005654,nucleoplasm; GO:0003729,mRNA binding; GO:0006952,defense response; GO:0051028,mRNA transport; GO:0003674,molecular_function; GO:0003676,nucleic acid binding; GO:0003723,RNA binding; GO:0005488,binding; GO:0097159,organic cyclic compound binding; GO:1901363,heterocyclic compound binding; GO:0006950,response to stress; GO:0008150,biological_process; GO:0050896,respo…	K12881	At5g37720	THO complex subunit 4D isoform X2
LOC113706934	ko03040: Spliceosome	GO:0016607,nuclear speck; GO:0003723,RNA binding; GO:0008270,zinc ion binding; GO:0000398,mRNA splicing, via spliceosome; GO:0003674,molecular_function; GO:0003676,nucleic acid binding; GO:0005488,binding; GO:0097159,organic cyclic compound binding; GO:1901363,heterocyclic compound binding; GO:0046872,metal ion binding; GO:0043167,ion binding; GO:0043169,cation binding; GO:0046914,transition meta…	K12896	At2g24590	serine/arginine-rich splicing factor RSZ22
LOC113711670	ko03013: RNA transport; ko03015: mRNA surveillance pathway; ko03040: Spliceosome	GO:0009507,chloroplast; GO:0005634,nucleus; GO:0046872,metal ion binding; GO:0003723,RNA binding; GO:0003674,molecular_function; GO:0005488,binding; GO:0043167,ion binding; GO:0043169,cation binding; GO:0003676,nucleic acid binding; GO:0097159,organic cyclic compound binding; GO:1901363,heterocyclic compound binding; GO:0005622,intracellular; GO:0005575,cellular_component; GO:0005623,cell; GO:000…	K13098	At5g58470	transcription initiation factor TFIID subunit 15b
LOC113727192	ko03040: Spliceosome	GO:0043531,ADP binding; GO:0005524,ATP binding; GO:0006952,defense response; GO:0000166,nucleotide binding; GO:0003674,molecular_function; GO:0005488,binding; GO:0017076,purine nucleotide binding; GO:0030554,adenyl nucleotide binding; GO:0032553,ribonucleotide binding; GO:0032555,purine ribonucleotide binding; GO:0032559,adenyl ribonucleotide binding; GO:0036094,small molecule binding; GO:0043167…	K12818	At3g14470	NB-ARC domain disease resistance protein, putative
LOC113730476	ko03040: Spliceosome	GO:0005737,cytoplasm; GO:0005829,cytosol; GO:0016607,nuclear speck; GO:0005681,spliceosomal complex; GO:0003729,mRNA binding; GO:0003723,RNA binding; GO:0000398,mRNA splicing, via spliceosome; GO:0008380,RNA splicing; GO:0003674,molecular_function; GO:0003676,nucleic acid binding; GO:0005488,binding; GO:0097159,organic cyclic compound binding; GO:1901363,heterocyclic compound binding; GO:0000375,…	K12900	At3g55460	serine/arginine-rich SC35-like splicing factor SCL30
LOC113730575	ko03040: Spliceosome	GO:0016607,nuclear speck; GO:0005681,spliceosomal complex; GO:0003729,mRNA binding; GO:0003723,RNA binding; GO:0008270,zinc ion binding; GO:0000398,mRNA splicing, via spliceosome; GO:0008380,RNA splicing; GO:0000245,spliceosomal complex assembly; GO:0003674,molecular_function; GO:0003676,nucleic acid binding; GO:0005488,binding; GO:0097159,organic cyclic compound binding; GO:1901363,heterocyclic …	K12896	At2g37340	serine/arginine-rich splicing factor RS2Z33-like
LOC113732449	ko03040: Spliceosome	GO:0043531,ADP binding; GO:0005524,ATP binding; GO:0006952,defense response; GO:0000166,nucleotide binding; GO:0003674,molecular_function; GO:0005488,binding; GO:0017076,purine nucleotide binding; GO:0030554,adenyl nucleotide binding; GO:0032553,ribonucleotide binding; GO:0032555,purine ribonucleotide binding; GO:0032559,adenyl ribonucleotide binding; GO:0036094,small molecule binding; GO:0043167…	K12818	At3g14470	NB-ARC domain disease resistance protein, putative
LOC113688543	ko00620: Pyruvate metabolism; ko00710: Carbon fixation in photosynthetic organisms; ko01100: Metabolic pathways; ko01200: Carbon metabolism	GO:0048046,apoplast; GO:0009507,chloroplast; GO:0005829,cytosol; GO:0008964,phosphoenolpyruvate carboxylase activity; GO:0015977,carbon fixation; GO:0048366,leaf development; GO:0015979,photosynthesis; GO:0006099,tricarboxylic acid cycle; GO:0003674,molecular_function; GO:0003824,catalytic activity; GO:0004611,phosphoenolpyruvate carboxykinase activity; GO:0016829,lyase activity; GO:0016830,carbo…	K01595	At3g14940	phosphoenolpyruvate carboxylase isoform X1
LOC113690449	ko00071: Fatty acid degradation; ko00072: Synthesis and degradation of ketone bodies; ko00280: Valine, leucine and isoleucine degradation; ko00310: Lysine degradation; ko00380: Tryptophan metabolism; ko00620: Pyruvate metabolism; ko00630: Glyoxylate and dicarboxylate metabolism; ko00640: Propanoate metabolism; ko00650: Butanoate metabolism; ko00900: Terpenoid backbone biosynthesis; ko01100: Metab…	GO:0005829,cytosol; GO:0005777,peroxisome; GO:0005886,plasma membrane; GO:0009536,plastid; GO:0003985,acetyl-CoA C-acetyltransferase activity; GO:0046872,metal ion binding; GO:0006635,fatty acid beta-oxidation; GO:0008299,isoprenoid biosynthetic process; GO:0009846,pollen germination; GO:0009860,pollen tube growth; GO:0016125,sterol metabolic process; GO:0003674,molecular_function; GO:0003824,cat…	K00626	At5g48230	acetyl-CoA acetyltransferase, cytosolic 1
LOC113690721	ko00630: Glyoxylate and dicarboxylate metabolism; ko01100: Metabolic pathways; ko01110: Biosynthesis of secondary metabolites; ko01200: Carbon metabolism; ko04146: Peroxisome	GO:0005777,peroxisome; GO:0010181,FMN binding; GO:0008891,glycolate oxidase activity; GO:0052853,long-chain-(S)-2-hydroxy-long-chain-acid oxidase activity; GO:0052854,medium-chain-(S)-2-hydroxy-acid oxidase activity; GO:0052852,very-long-chain-(S)-2-hydroxy-acid oxidase activity; GO:0009854,oxidative photosynthetic carbon pathway; GO:0000166,nucleotide binding; GO:0003674,molecular_function; GO:0…	K11517	At3g14415	peroxisomal (S)-2-hydroxy-acid oxidase GLO1
LOC113691095	ko00280: Valine, leucine and isoleucine degradation; ko00410: beta-Alanine metabolism; ko00640: Propanoate metabolism; ko01100: Metabolic pathways; ko01200: Carbon metabolism	GO:0005829,cytosol; GO:0005576,extracellular region; GO:0003860,3-hydroxyisobutyryl-CoA hydrolase activity; GO:0080167,response to karrikin; GO:0006574,valine catabolic process; GO:0003674,molecular_function; GO:0003824,catalytic activity; GO:0016289,CoA hydrolase activity; GO:0016787,hydrolase activity; GO:0016788,hydrolase activity, acting on ester bonds; GO:0016790,thiolester hydrolase activit…	K05605	At1g06550	3-hydroxyisobutyryl-CoA hydrolase-like protein 5
LOC113691422	ko00620: Pyruvate metabolism; ko00710: Carbon fixation in photosynthetic organisms; ko01100: Metabolic pathways; ko01200: Carbon metabolism	GO:0005737,cytoplasm; GO:0004471,malate dehydrogenase (decarboxylating) (NAD+) activity; GO:0004473,malate dehydrogenase (decarboxylating) (NADP+) activity; GO:0046872,metal ion binding; GO:0051287,NAD binding; GO:0008948,oxaloacetate decarboxylase activity; GO:0003674,molecular_function; GO:0003824,catalytic activity; GO:0004470,malic enzyme activity; GO:0016491,oxidoreductase activity; GO:00166…	K00029	At5g11670	NADP-dependent malic enzyme
LOC113694634	ko00010: Glycolysis / Gluconeogenesis; ko00051: Fructose and mannose metabolism; ko00562: Inositol phosphate metabolism; ko00710: Carbon fixation in photosynthetic organisms; ko01100: Metabolic pathways; ko01110: Biosynthesis of secondary metabolites; ko01200: Carbon metabolism; ko01230: Biosynthesis of amino acids	GO:0046872,metal ion binding; GO:0003723,RNA binding; GO:0006952,defense response; GO:0003674,molecular_function; GO:0005488,binding; GO:0043167,ion binding; GO:0043169,cation binding; GO:0003676,nucleic acid binding; GO:0097159,organic cyclic compound binding; GO:1901363,heterocyclic compound binding; GO:0006950,response to stress; GO:0008150,biological_process; GO:0050896,response to stimulus	K01803	At3g55470	triosephosphate isomerase, cytosolic
LOC113696193	ko00010: Glycolysis / Gluconeogenesis; ko00710: Carbon fixation in photosynthetic organisms; ko01100: Metabolic pathways; ko01110: Biosynthesis of secondary metabolites; ko01200: Carbon metabolism; ko01230: Biosynthesis of amino acids	GO:0005829,cytosol; GO:0043531,ADP binding; GO:0005524,ATP binding; GO:0004618,phosphoglycerate kinase activity; GO:0006094,gluconeogenesis; GO:0006096,glycolytic process; GO:0000166,nucleotide binding; GO:0003674,molecular_function; GO:0005488,binding; GO:0017076,purine nucleotide binding; GO:0030554,adenyl nucleotide binding; GO:0032553,ribonucleotide binding; GO:0032555,purine ribonucleotide b…	K00927	At1g56190	phosphoglycerate kinase-like
LOC113698165	ko00630: Glyoxylate and dicarboxylate metabolism; ko00710: Carbon fixation in photosynthetic organisms; ko01100: Metabolic pathways; ko01110: Biosynthesis of secondary metabolites; ko01200: Carbon metabolism	GO:0009507,chloroplast; GO:0009853,photorespiration; GO:0019253,reductive pentose-phosphate cycle; GO:0008152,metabolic process; GO:0008150,biological_process; GO:0009987,cellular process; GO:0043094,cellular metabolic compound salvage; GO:0044237,cellular metabolic process; GO:0005975,carbohydrate metabolic process; GO:0009058,biosynthetic process; GO:0015977,carbon fixation; GO:0015979,photosyn…	K01602	At1g67090	ribulose bisphosphate carboxylase small chain, chloropla
LOC113698591	ko00280: Valine, leucine and isoleucine degradation; ko00410: beta-Alanine metabolism; ko00562: Inositol phosphate metabolism; ko00640: Propanoate metabolism; ko01100: Metabolic pathways; ko01200: Carbon metabolism	GO:0005829,cytosol; GO:0005739,mitochondrion; GO:0005507,copper ion binding; GO:0018478,malonate-semialdehyde dehydrogenase (acetylating) activity; GO:0004491,methylmalonate-semialdehyde dehydrogenase (acylating) activity; GO:0006979,response to oxidative stress; GO:0006210,thymine catabolic process; GO:0006574,valine catabolic process; GO:0003674,molecular_function; GO:0005488,binding; GO:004687…	K00140	At2g14170	uncharacterized LOC100254417
LOC113698663	ko00020: Citrate cycle (TCA cycle); ko00270: Cysteine and methionine metabolism; ko00620: Pyruvate metabolism; ko00630: Glyoxylate and dicarboxylate metabolism; ko00710: Carbon fixation in photosynthetic organisms; ko01100: Metabolic pathways; ko01110: Biosynthesis of secondary metabolites; ko01200: Carbon metabolism	GO:0009507,chloroplast; GO:0005737,cytoplasm; GO:0005777,peroxisome; GO:0030060,L-malate dehydrogenase activity; GO:0006097,glyoxylate cycle; GO:0006108,malate metabolic process; GO:0031998,regulation of fatty acid beta-oxidation; GO:0080093,regulation of photorespiration; GO:0006099,tricarboxylic acid cycle; GO:0003674,molecular_function; GO:0003824,catalytic activity; GO:0016491,oxidoreductase …	K00026	At2g22780	malate dehydrogenase, glyoxysomal-like
LOC113699686	ko00010: Glycolysis / Gluconeogenesis; ko00620: Pyruvate metabolism; ko00630: Glyoxylate and dicarboxylate metabolism; ko00640: Propanoate metabolism; ko01100: Metabolic pathways; ko01110: Biosynthesis of secondary metabolites; ko01200: Carbon metabolism	GO:0016021,integral component of membrane; GO:0003987,acetate-CoA ligase activity; GO:0003674,molecular_function; GO:0003824,catalytic activity; GO:0016405,CoA-ligase activity; GO:0016874,ligase activity; GO:0016877,ligase activity, forming carbon-sulfur bonds; GO:0016878,acid-thiol ligase activity; GO:0005575,cellular_component; GO:0016020,membrane; GO:0031224,intrinsic component of membrane; GO…	K01895	At1g55320	ACS2; acetyl CoA synthetase
LOC113700096	ko00020: Citrate cycle (TCA cycle); ko00480: Glutathione metabolism; ko01100: Metabolic pathways; ko01110: Biosynthesis of secondary metabolites; ko01200: Carbon metabolism; ko01210: 2-Oxocarboxylic acid metabolism; ko01230: Biosynthesis of amino acids; ko04146: Peroxisome	GO:0005739,mitochondrion; GO:0004450,isocitrate dehydrogenase (NADP+) activity; GO:0000287,magnesium ion binding; GO:0051287,NAD binding; GO:0006097,glyoxylate cycle; GO:0006102,isocitrate metabolic process; GO:0006739,NADP metabolic process; GO:0006099,tricarboxylic acid cycle; GO:0003674,molecular_function; GO:0003824,catalytic activity; GO:0004448,isocitrate dehydrogenase activity; GO:0016491,…	K00031	At1g65930	isocitrate dehydrogenase [NADP] isoform X1
LOC113700141	ko00020: Citrate cycle (TCA cycle); ko00640: Propanoate metabolism; ko01100: Metabolic pathways; ko01110: Biosynthesis of secondary metabolites; ko01200: Carbon metabolism	GO:0005739,mitochondrion; GO:0009361,succinate-CoA ligase complex (ADP-forming); GO:0000166,nucleotide binding; GO:0004775,succinate-CoA ligase (ADP-forming) activity; GO:0004776,succinate-CoA ligase (GDP-forming) activity; GO:0006105,succinate metabolic process; GO:0006104,succinyl-CoA metabolic process; GO:0006099,tricarboxylic acid cycle; GO:0003674,molecular_function; GO:0005488,binding; GO:0…	K01899	At5g08300	succinyl-CoA ligase [ADP-forming] subunit alpha-2, mitoch
LOC113701240	ko00630: Glyoxylate and dicarboxylate metabolism; ko00710: Carbon fixation in photosynthetic organisms; ko01100: Metabolic pathways; ko01110: Biosynthesis of secondary metabolites; ko01200: Carbon metabolism	GO:0009507,chloroplast; GO:0009853,photorespiration; GO:0019253,reductive pentose-phosphate cycle; GO:0008152,metabolic process; GO:0008150,biological_process; GO:0009987,cellular process; GO:0043094,cellular metabolic compound salvage; GO:0044237,cellular metabolic process; GO:0005975,carbohydrate metabolic process; GO:0009058,biosynthetic process; GO:0015977,carbon fixation; GO:0015979,photosyn…	K01602	At1g67090	ribulose bisphosphate carboxylase small chain, chloropla
LOC113704182	ko00030: Pentose phosphate pathway; ko00230: Purine metabolism; ko01100: Metabolic pathways; ko01110: Biosynthesis of secondary metabolites; ko01200: Carbon metabolism; ko01230: Biosynthesis of amino acids	GO:0009507,chloroplast; GO:0005737,cytoplasm; GO:0002189,ribose phosphate diphosphokinase complex; GO:0005524,ATP binding; GO:0016301,kinase activity; GO:0000287,magnesium ion binding; GO:0004749,ribose phosphate diphosphokinase activity; GO:0006015,5-phosphoribose 1-diphosphate biosynthetic process; GO:0009116,nucleoside metabolic process; GO:0006164,purine nucleotide biosynthetic process; GO:00…	K00948	At1g32380	ribose-phosphate pyrophosphokinase 1-like
LOC113708507	ko00630: Glyoxylate and dicarboxylate metabolism; ko01100: Metabolic pathways; ko01200: Carbon metabolism	GO:0009507,chloroplast; GO:0009326,formate dehydrogenase complex; GO:0005739,mitochondrion; GO:0008863,formate dehydrogenase (NAD+) activity; GO:0051287,NAD binding; GO:0016616,oxidoreductase activity, acting on the CH-OH group of donors, NAD or NADP as acceptor; GO:0042183,formate catabolic process; GO:0003674,molecular_function; GO:0003824,catalytic activity; GO:0016491,oxidoreductase activity;…	K00122	At5g14780	formate dehydrogenase, mitochondrial
LOC113710385	ko00260: Glycine, serine and threonine metabolism; ko01100: Metabolic pathways; ko01110: Biosynthesis of secondary metabolites; ko01200: Carbon metabolism; ko01230: Biosynthesis of amino acids	GO:0009507,chloroplast; GO:0005737,cytoplasm; GO:0009536,plastid; GO:0036425,D-phosphoserine phosphatase activity; GO:0036424,L-phosphoserine phosphatase activity; GO:0000287,magnesium ion binding; GO:0004647,phosphoserine phosphatase activity; GO:0016311,dephosphorylation; GO:0009793,embryo development ending in seed dormancy; GO:0006564,L-serine biosynthetic process; GO:0006563,L-serine metabol…	K01079	At1g18640	phosphoserine phosphatase, chloroplastic
LOC113711659	ko00010: Glycolysis / Gluconeogenesis; ko00260: Glycine, serine and threonine metabolism; ko01100: Metabolic pathways; ko01110: Biosynthesis of secondary metabolites; ko01200: Carbon metabolism; ko01230: Biosynthesis of amino acids	GO:0009507,chloroplast; GO:0004619,phosphoglycerate mutase activity; GO:0006094,gluconeogenesis; GO:0006096,glycolytic process; GO:0003674,molecular_function; GO:0003824,catalytic activity; GO:0016853,isomerase activity; GO:0016866,intramolecular transferase activity; GO:0016868,intramolecular transferase activity, phosphotransferases; GO:0008152,metabolic process; GO:0005975,carbohydrate metabol…	K01834	At1g22170	uncharacterized protein LOC111391082 isoform
LOC113712065	ko00260: Glycine, serine and threonine metabolism; ko00460: Cyanoamino acid metabolism; ko00630: Glyoxylate and dicarboxylate metabolism; ko00670: One carbon pool by folate; ko01100: Metabolic pathways; ko01110: Biosynthesis of secondary metabolites; ko01200: Carbon metabolism; ko01230: Biosynthesis of amino acids; ko01240: Biosynthesis of cofactors	GO:0005737,cytoplasm; GO:0005829,cytosol; GO:0005747,mitochondrial respiratory chain complex I; GO:0005739,mitochondrion; GO:0009536,plastid; GO:0050897,cobalt ion binding; GO:0004372,glycine hydroxymethyltransferase activity; GO:0030170,pyridoxal phosphate binding; GO:0070905,serine binding; GO:0008270,zinc ion binding; GO:0046655,folic acid metabolic process; GO:0019264,glycine biosynthetic pro…	K00600	At4g37930	serine hydroxymethyltransferase, mitochondrial-like
LOC113714675	ko00010: Glycolysis / Gluconeogenesis; ko00020: Citrate cycle (TCA cycle); ko00620: Pyruvate metabolism; ko00710: Carbon fixation in photosynthetic organisms; ko01100: Metabolic pathways; ko01110: Biosynthesis of secondary metabolites; ko01200: Carbon metabolism	GO:0005737,cytoplasm; GO:0005829,cytosol; GO:0005730,nucleolus; GO:0005634,nucleus; GO:0005524,ATP binding; GO:0046872,metal ion binding; GO:0004612,phosphoenolpyruvate carboxykinase (ATP) activity; GO:0016036,cellular response to phosphate starvation; GO:0050832,defense response to fungus; GO:0006094,gluconeogenesis; GO:0046686,response to cadmium ion; GO:0000166,nucleotide binding; GO:0003674,m…	K01610	At4g37870	phosphoenolpyruvate carboxykinase (ATP)-like
LOC113714685	ko00260: Glycine, serine and threonine metabolism; ko00460: Cyanoamino acid metabolism; ko00630: Glyoxylate and dicarboxylate metabolism; ko00670: One carbon pool by folate; ko01100: Metabolic pathways; ko01110: Biosynthesis of secondary metabolites; ko01200: Carbon metabolism; ko01230: Biosynthesis of amino acids; ko01240: Biosynthesis of cofactors	GO:0005737,cytoplasm; GO:0005829,cytosol; GO:0005747,mitochondrial respiratory chain complex I; GO:0005739,mitochondrion; GO:0009536,plastid; GO:0050897,cobalt ion binding; GO:0004372,glycine hydroxymethyltransferase activity; GO:0030170,pyridoxal phosphate binding; GO:0070905,serine binding; GO:0008270,zinc ion binding; GO:0046655,folic acid metabolic process; GO:0019264,glycine biosynthetic pro…	K00600	At4g37930	serine hydroxymethyltransferase, mitochondrial-like
LOC113719543	ko00710: Carbon fixation in photosynthetic organisms; ko01100: Metabolic pathways; ko01200: Carbon metabolism	GO:0048046,apoplast; GO:0009507,chloroplast; GO:0004365,glyceraldehyde-3-phosphate dehydrogenase (NAD+) (phosphorylating) activity; GO:0047100,glyceraldehyde-3-phosphate dehydrogenase (NADP+) (phosphorylating) activity; GO:0051287,NAD binding; GO:0050661,NADP binding; GO:0006006,glucose metabolic process; GO:0019253,reductive pentose-phosphate cycle; GO:0003674,molecular_function; GO:0003824,cata…	K05298	At1g12900	glyceraldehyde-3-phosphate dehydrog
LOC113719654	ko00030: Pentose phosphate pathway; ko01100: Metabolic pathways; ko01110: Biosynthesis of secondary metabolites; ko01200: Carbon metabolism	GO:0005737,cytoplasm; GO:0005829,cytosol; GO:0017057,6-phosphogluconolactonase activity; GO:0005975,carbohydrate metabolic process; GO:0009051,pentose-phosphate shunt, oxidative branch; GO:0003674,molecular_function; GO:0003824,catalytic activity; GO:0016787,hydrolase activity; GO:0016788,hydrolase activity, acting on ester bonds; GO:0052689,carboxylic ester hydrolase activity; GO:0008152,metabol…	K01057	At1g13700	probable 6-phosphogluconolactonase 1
LOC113722933	ko00030: Pentose phosphate pathway; ko00480: Glutathione metabolism; ko01100: Metabolic pathways; ko01110: Biosynthesis of secondary metabolites; ko01200: Carbon metabolism	GO:0005737,cytoplasm; GO:0004345,glucose-6-phosphate dehydrogenase activity; GO:0050661,NADP binding; GO:0006006,glucose metabolic process; GO:0006098,pentose-phosphate shunt; GO:0003674,molecular_function; GO:0003824,catalytic activity; GO:0016491,oxidoreductase activity; GO:0016614,oxidoreductase activity, acting on CH-OH group of donors; GO:0016616,oxidoreductase activity, acting on the CH-OH …	K00036	At5g40760	glucose-6-phosphate 1-dehydrogenase, cytoplasmic isoform
LOC113725078	ko00380: Tryptophan metabolism; ko00630: Glyoxylate and dicarboxylate metabolism; ko01100: Metabolic pathways; ko01110: Biosynthesis of secondary metabolites; ko01200: Carbon metabolism; ko04016: MAPK signaling pathway - plant; ko04146: Peroxisome	--	K03781	At5g52030	catalase-domain-containing protein
LOC113725461	ko00010: Glycolysis / Gluconeogenesis; ko00051: Fructose and mannose metabolism; ko00562: Inositol phosphate metabolism; ko00710: Carbon fixation in photosynthetic organisms; ko01100: Metabolic pathways; ko01110: Biosynthesis of secondary metabolites; ko01200: Carbon metabolism; ko01230: Biosynthesis of amino acids	GO:0046872,metal ion binding; GO:0003723,RNA binding; GO:0006952,defense response; GO:0003674,molecular_function; GO:0005488,binding; GO:0043167,ion binding; GO:0043169,cation binding; GO:0003676,nucleic acid binding; GO:0097159,organic cyclic compound binding; GO:1901363,heterocyclic compound binding; GO:0006950,response to stress; GO:0008150,biological_process; GO:0050896,response to stimulus	K01803	At3g55470	triosephosphate isomerase, cytosolic
LOC113732547	ko00010: Glycolysis / Gluconeogenesis; ko00710: Carbon fixation in photosynthetic organisms; ko01100: Metabolic pathways; ko01110: Biosynthesis of secondary metabolites; ko01200: Carbon metabolism; ko01230: Biosynthesis of amino acids	GO:0008194,UDP-glycosyltransferase activity; GO:0003674,molecular_function; GO:0003824,catalytic activity; GO:0016740,transferase activity; GO:0016757,transferase activity, transferring glycosyl groups	K00927	At2g36970	uncharacterized LOC109182250
LOC113738056	ko00010: Glycolysis / Gluconeogenesis; ko00620: Pyruvate metabolism; ko00630: Glyoxylate and dicarboxylate metabolism; ko00650: Butanoate metabolism; ko01100: Metabolic pathways; ko01110: Biosynthesis of secondary metabolites; ko01200: Carbon metabolism	GO:0003987,acetate-CoA ligase activity; GO:0003674,molecular_function; GO:0003824,catalytic activity; GO:0016405,CoA-ligase activity; GO:0016874,ligase activity; GO:0016877,ligase activity, forming carbon-sulfur bonds; GO:0016878,acid-thiol ligase activity	K01913	At3g16910	acetate/butyrate--CoA ligase AAE7, peroxisomal
LOC113741483	ko00061: Fatty acid biosynthesis; ko00620: Pyruvate metabolism; ko00640: Propanoate metabolism; ko01100: Metabolic pathways; ko01110: Biosynthesis of secondary metabolites; ko01200: Carbon metabolism; ko01212: Fatty acid metabolism	GO:0009317,acetyl-CoA carboxylase complex; GO:0009507,chloroplast; GO:0009941,chloroplast envelope; GO:0009570,chloroplast stroma; GO:0009536,plastid; GO:0003989,acetyl-CoA carboxylase activity; GO:0006633,fatty acid biosynthetic process; GO:0003674,molecular_function; GO:0003824,catalytic activity; GO:0016421,CoA carboxylase activity; GO:0016874,ligase activity; GO:0016885,ligase activity, formi…	K02160	At3g15690	Lj1g3v3008790.1
